# Supplementary material for: Therapeutic Potential of TNFα and IL1β Blockade for CRS/ICANS in CAR-T Therapy via Ameliorating Endothelial Activation
Source: Front Immunol. 2021 May 19;12:623610. doi: 10.3389/fimmu.2021.623610 (PMC8170323; doi:10.3389/fimmu.2021.623610)
Supplement: Supplementary file 4 [file Table_6.xlsx]

## Sheet: 表达量分析表
GO_id	GO_term	Gene_id	Gene_name	Gene_description	CART-tpm	CT-tpm
GO:0006468;GO:0016477;GO:0005794;GO:0030027;GO:0016301;GO:0005515;GO:0004672;GO:000552	BP:protein phosphorylation;BP:cell migration;CC:Golgi apparatus;CC:lamellipodium;MF:kinase activity;MF:protein binding;MF:protein kinase activity;MF:ATP binding;	ENSG00000000457	t	SCY1 like pseudokinase 3 [Source:HGNC Symbol;Acc:HGNC:19285]	4.255	1.395
GO:0006508;GO:0005737;GO:0070062;GO:0005802;GO:0005739;GO:0005654;GO:0005925;GO:0004177;GO:0030145;GO:000823	BP:proteolysis;CC:cytoplasm;CC:extracellular exosome;CC:trans-Golgi network;CC:mitochondrion;CC:nucleoplasm;CC:focal adhesion;MF:aminopeptidase activity;MF:manganese ion binding;MF:metalloexopeptidase activity;	ENSG00000002549	LAP3	leucine aminopeptidase 3 [Source:HGNC Symbol;Acc:HGNC:18449]	352.155	138.9
GO:0006024;GO:0016021;GO:0005796;GO:0008146;GO:000846	BP:glycosaminoglycan biosynthetic process;CC:integral component of membrane;CC:Golgi lumen;MF:sulfotransferase activity;MF:[heparan sulfate]-glucosamine 3-sulfotransferase 1 activity;	ENSG00000002587	HS3ST1	heparan sulfate-glucosamine 3-sulfotransferase 1 [Source:HGNC Symbol;Acc:HGNC:5194]	0.025	0.345
GO:0001709;GO:0030326;GO:0060349;GO:0045580;GO:0010628;GO:0061436;GO:0001768;GO:0055114;GO:2001037;GO:0048387;GO:0043587;GO:0007140;GO:0070268;GO:0007283;GO:0006954;GO:0055114;GO:0034653;GO:0009954;GO:0071300;GO:0005789;GO:0005737;GO:0031090;GO:0016705;GO:0005506;GO:0020037;GO:0008401;GO:0005506;GO:0020037;GO:000197	BP:cell fate determination;BP:embryonic limb morphogenesis;BP:bone morphogenesis;BP:regulation of T cell differentiation;BP:positive regulation of gene expression;BP:establishment of skin barrier;BP:establishment of T cell polarity;BP:oxidation-reduction process;BP:positive regulation of tongue muscle cell differentiation;BP:negative regulation of retinoic acid receptor signaling pathway;BP:tongu…	ENSG00000003137	CYP26B1	cytochrome P450 family 26 subfamily B member 1 [Source:HGNC Symbol;Acc:HGNC:20581]	5.675	29.115
GO:0030225;GO:0008625;GO:0006508;GO:0042981;GO:0043123;GO:0031265;GO:0097342;GO:0031625;GO:0097199;GO:003587	BP:macrophage differentiation;BP:extrinsic apoptotic signaling pathway via death domain receptors;BP:proteolysis;BP:regulation of apoptotic process;BP:positive regulation of I-kappaB kinase/NF-kappaB signaling;CC:CD95 death-inducing signaling complex;CC:ripoptosome;MF:ubiquitin protein ligase binding;MF:cysteine-type endopeptidase activity involved in apoptotic signaling pathway;MF:death effector…	ENSG00000003400	CASP10	caspase 10 [Source:HGNC Symbol;Acc:HGNC:1500]	38.185	12.765
GO:1902042;GO:0097194;GO:0043403;GO:0042981;GO:0043085;GO:0007519;GO:0006508;GO:0014842;GO:0043123;GO:0014866;GO:0060544;GO:0014732;GO:0051092;GO:1901740;GO:0016032;GO:0031264;GO:0031265;GO:0045121;GO:0097342;GO:0005123;GO:0008047;GO:0097200;GO:0002020;GO:0032403;GO:000419	BP:negative regulation of extrinsic apoptotic signaling pathway via death domain receptors;BP:execution phase of apoptosis;BP:skeletal muscle tissue regeneration;BP:regulation of apoptotic process;BP:positive regulation of catalytic activity;BP:skeletal muscle tissue development;BP:proteolysis;BP:regulation of skeletal muscle satellite cell proliferation;BP:positive regulation of I-kappaB kinase/…	ENSG00000003402	CFLAR	CASP8 and FADD like apoptosis regulator [Source:HGNC Symbol;Acc:HGNC:1876]	219.82	92.47
GO:0097639;GO:0097638;GO:0006520;GO:0050727;GO:0097640;GO:1990822;GO:0043030;GO:0006809;GO:0002537;GO:0005887;GO:0005289;GO:0097626;GO:0097627;GO:0005292;GO:001529	BP:L-lysine import across plasma membrane;BP:L-arginine import across plasma membrane;BP:cellular amino acid metabolic process;BP:regulation of inflammatory response;BP:L-ornithine import across plasma membrane;BP:basic amino acid transmembrane transport;BP:regulation of macrophage activation;BP:nitric oxide biosynthetic process;BP:nitric oxide production involved in inflammatory response;CC:inte…	ENSG00000003989	SLC7A2	solute carrier family 7 member 2 [Source:HGNC Symbol;Acc:HGNC:11060]	94.69	17.04
GO:0032024;GO:0045907;GO:0030307;GO:0097190;GO:0001666;GO:0032355;GO:0070555;GO:0043066;GO:0032526;GO:0050853;GO:0030890;GO:0045892;GO:0045893;GO:0045779;GO:0007565;GO:0060292;GO:0042493;GO:0007204;GO:0033194;GO:0032570;GO:0070062;GO:0009986;GO:0005634;GO:0005886;GO:0005829;GO:0016021;GO:0003953;GO:0016849;GO:0016740;GO:0050135;GO:0003953;GO:005013	BP:positive regulation of insulin secretion;BP:positive regulation of vasoconstriction;BP:positive regulation of cell growth;BP:apoptotic signaling pathway;BP:response to hypoxia;BP:response to estradiol;BP:response to interleukin-1;BP:negative regulation of apoptotic process;BP:response to retinoic acid;BP:B cell receptor signaling pathway;BP:positive regulation of B cell proliferation;BP:negati…	ENSG00000004468	CD38	CD38 molecule [Source:HGNC Symbol;Acc:HGNC:1667]	5.545	0.305
GO:0032147;GO:0016310;GO:0006468;GO:0035556;GO:0018105;GO:0018107;GO:0045860;GO:0005634;GO:0005737;GO:0005634;GO:0005634;GO:0005737;GO:0005829;GO:0005829;GO:0004683;GO:0005516;GO:0005515;GO:0016301;GO:0016740;GO:0005524;GO:0005524;GO:0004674;GO:0000166;GO:0004672;GO:0005516;GO:0005516;GO:0004683;GO:0004683;GO:0004683;GO:000552	BP:activation of protein kinase activity;BP:phosphorylation;BP:protein phosphorylation;BP:intracellular signal transduction;BP:peptidyl-serine phosphorylation;BP:peptidyl-threonine phosphorylation;BP:positive regulation of protein kinase activity;CC:nucleus;CC:cytoplasm;CC:nucleus;CC:nucleus;CC:cytoplasm;CC:cytosol;CC:cytosol;MF:calmodulin-dependent protein kinase activity;MF:calmodulin binding;M…	ENSG00000004660	CAMKK1	calcium/calmodulin dependent protein kinase kinase 1 [Source:HGNC Symbol;Acc:HGNC:1469]	0.175	1.195
GO:0036444;GO:0051560;GO:1990246;GO:0016021;GO:0031305;GO:0019855;GO:0005262;GO:001529	BP:calcium ion transmembrane import into mitochondrion;BP:mitochondrial calcium ion homeostasis;CC:uniplex complex;CC:integral component of membrane;CC:integral component of mitochondrial inner membrane;MF:calcium channel inhibitor activity;MF:calcium channel activity;MF:uniporter activity;	ENSG00000005059	MCUB	mitochondrial calcium uniporter dominant negative beta subunit [Source:HGNC Symbol;Acc:HGNC:26076]	79.62	38.84
GO:0006355;GO:0005654;GO:0005634;GO:0043565;GO:0003677;GO:000367	BP:regulation of transcription, DNA-templated;CC:nucleoplasm;CC:nucleus;MF:sequence-specific DNA binding;MF:DNA binding;MF:DNA binding;	ENSG00000005073	HOXA11	homeobox A11 [Source:HGNC Symbol;Acc:HGNC:5101]	1.88	8.125
GO:0006633;GO:0008152;GO:0008217;GO:0008152;GO:0042632;GO:0005759;GO:0015645;GO:0003824;GO:0003824;GO:0047760;GO:0046872;GO:000552	BP:fatty acid biosynthetic process;BP:metabolic process;BP:regulation of blood pressure;BP:metabolic process;BP:cholesterol homeostasis;CC:mitochondrial matrix;MF:fatty acid ligase activity;MF:catalytic activity;MF:catalytic activity;MF:butyrate-CoA ligase activity;MF:metal ion binding;MF:ATP binding;	ENSG00000005187	ACSM3	acyl-CoA synthetase medium-chain family member 3 [Source:HGNC Symbol;Acc:HGNC:10522]	2.15	6.405
GO:0015908;GO:0015936;GO:0010243;GO:0042493;GO:0033540;GO:0006635;GO:0009437;GO:0006091;GO:0051791;GO:0005782;GO:0005777;GO:0005739;GO:0005102;GO:0008458;GO:001674	BP:fatty acid transport;BP:coenzyme A metabolic process;BP:response to organonitrogen compound;BP:response to drug;BP:fatty acid beta-oxidation using acyl-CoA oxidase;BP:fatty acid beta-oxidation;BP:carnitine metabolic process;BP:generation of precursor metabolites and energy;BP:medium-chain fatty acid metabolic process;CC:peroxisomal matrix;CC:peroxisome;CC:mitochondrion;MF:receptor binding;MF:c…	ENSG00000005469	CROT	carnitine O-octanoyltransferase [Source:HGNC Symbol;Acc:HGNC:2366]	0.765	2.365
GO:0006869;GO:0071397;GO:1901800;GO:0097038;GO:0005829;GO:0005886;GO:0005776;GO:0005789;GO:0015485;GO:000551	BP:lipid transport;BP:cellular response to cholesterol;BP:positive regulation of proteasomal protein catabolic process;CC:perinuclear endoplasmic reticulum;CC:cytosol;CC:plasma membrane;CC:autophagosome;CC:endoplasmic reticulum membrane;MF:cholesterol binding;MF:protein binding;	ENSG00000006025	OSBPL7	oxysterol binding protein like 7 [Source:HGNC Symbol;Acc:HGNC:16387]	1.025	4.1
GO:0051041;GO:0070098;GO:0019221;GO:0006955;GO:0045906;GO:0050902;GO:0060326;GO:0060080;GO:0048246;GO:0001666;GO:0048247;GO:0043547;GO:0002052;GO:0071356;GO:0045766;GO:0007186;GO:2001240;GO:0030593;GO:0048661;GO:0032914;GO:0060055;GO:0001774;GO:0002523;GO:0033622;GO:0030168;GO:0002548;GO:0050710;GO:0007568;GO:0071347;GO:0071346;GO:0050729;GO:0010759;GO:0070374;GO:0016021;GO:0005576;GO:0048471;GO:…	BP:positive regulation of calcium-independent cell-cell adhesion;BP:chemokine-mediated signaling pathway;BP:cytokine-mediated signaling pathway;BP:immune response;BP:negative regulation of vasoconstriction;BP:leukocyte adhesive activation;BP:cell chemotaxis;BP:inhibitory postsynaptic potential;BP:macrophage chemotaxis;BP:response to hypoxia;BP:lymphocyte chemotaxis;BP:positive regulation of GTPas…	ENSG00000006210	CX3CL1	C-X3-C motif chemokine ligand 1 [Source:HGNC Symbol;Acc:HGNC:10647]	2193.51	3.35
GO:0071800;GO:0030316;GO:0043547;GO:0016601;GO:0031532;GO:0071526;GO:0016322;GO:0035023;GO:0007155;GO:0033623;GO:0005856;GO:0005829;GO:0005737;GO:0019898;GO:0030676;GO:000809	BP:podosome assembly;BP:osteoclast differentiation;BP:positive regulation of GTPase activity;BP:Rac protein signal transduction;BP:actin cytoskeleton reorganization;BP:semaphorin-plexin signaling pathway;BP:neuron remodeling;BP:regulation of Rho protein signal transduction;BP:cell adhesion;BP:regulation of integrin activation;CC:cytoskeleton;CC:cytosol;CC:cytoplasm;CC:extrinsic component of membr…	ENSG00000006607	FARP2	FERM, ARH/RhoGEF and pleckstrin domain protein 2 [Source:HGNC Symbol;Acc:HGNC:16460]	14.99	9.745
GO:0050901;GO:0007165;GO:0032496;GO:0050727;GO:0030029;GO:0019722;GO:0034612;GO:0002092;GO:0007157;GO:0002523;GO:0007202;GO:0070555;GO:0005901;GO:0005615;GO:0016021;GO:0048471;GO:0030863;GO:0005905;GO:0070492;GO:0043274;GO:0033691;GO:000488	BP:leukocyte tethering or rolling;BP:signal transduction;BP:response to lipopolysaccharide;BP:regulation of inflammatory response;BP:actin filament-based process;BP:calcium-mediated signaling;BP:response to tumor necrosis factor;BP:positive regulation of receptor internalization;BP:heterophilic cell-cell adhesion via plasma membrane cell adhesion molecules;BP:leukocyte migration involved in infla…	ENSG00000007908	SELE	selectin E [Source:HGNC Symbol;Acc:HGNC:10718]	433.075	20.67
GO:0006367;GO:0006915;GO:0050794;GO:0006351;GO:0007049;GO:0005654;GO:0044424;GO:0003700;GO:0008134;GO:0001047;GO:000367	BP:transcription initiation from RNA polymerase II promoter;BP:apoptotic process;BP:regulation of cellular process;BP:transcription, DNA-templated;BP:cell cycle;CC:nucleoplasm;CC:intracellular part;MF:transcription factor activity, sequence-specific DNA binding;MF:transcription factor binding;MF:core promoter binding;MF:DNA binding;	ENSG00000007968	E2F2	E2F transcription factor 2 [Source:HGNC Symbol;Acc:HGNC:3114]	0.17	0.945
GO:2000300;GO:0005794;GO:0030672;GO:0043209;GO:0005829;GO:0048786;GO:0030425;GO:0014069;GO:0000795;GO:0043195;GO:0030054;GO:0048306;GO:0005215;GO:0003779;GO:0019901;GO:0003824;GO:000552	BP:regulation of synaptic vesicle exocytosis;CC:Golgi apparatus;CC:synaptic vesicle membrane;CC:myelin sheath;CC:cytosol;CC:presynaptic active zone;CC:dendrite;CC:postsynaptic density;CC:synaptonemal complex;CC:terminal bouton;CC:cell junction;MF:calcium-dependent protein binding;MF:transporter activity;MF:actin binding;MF:protein kinase binding;MF:catalytic activity;MF:ATP binding;	ENSG00000008056	SYN1	synapsin I [Source:HGNC Symbol;Acc:HGNC:11494]	0.3	0.03
GO:0006468;GO:0005886;GO:0000139;GO:0012505;GO:0043005;GO:0005954;GO:0004683;GO:0004674;GO:0005516;GO:0004672;GO:000552	BP:protein phosphorylation;CC:plasma membrane;CC:Golgi membrane;CC:endomembrane system;CC:neuron projection;CC:calcium- and calmodulin-dependent protein kinase complex;MF:calmodulin-dependent protein kinase activity;MF:protein serine/threonine kinase activity;MF:calmodulin binding;MF:protein kinase activity;MF:ATP binding;	ENSG00000008118	CAMK1G	calcium/calmodulin dependent protein kinase IG [Source:HGNC Symbol;Acc:HGNC:14585]	0.35	0
GO:0006355;GO:0006260;GO:0005634;GO:000370	BP:regulation of transcription, DNA-templated;BP:DNA replication;CC:nucleus;MF:transcription factor activity, sequence-specific DNA binding;	ENSG00000008441	NFIX	nuclear factor I X [Source:HGNC Symbol;Acc:HGNC:7788]	19.565	7.865
GO:0060022;GO:0006954;GO:0006508;GO:0016021;GO:0031012;GO:0005886;GO:0031225;GO:0005578;GO:0004222;GO:0005509;GO:000827	BP:hard palate development;BP:inflammatory response;BP:proteolysis;CC:integral component of membrane;CC:extracellular matrix;CC:plasma membrane;CC:anchored component of membrane;CC:proteinaceous extracellular matrix;MF:metalloendopeptidase activity;MF:calcium ion binding;MF:zinc ion binding;	ENSG00000008516	MMP25	matrix metallopeptidase 25 [Source:HGNC Symbol;Acc:HGNC:14246]	2.335	0.14
GO:0006955;GO:0006955;GO:0007155;GO:0006952;GO:0006952;GO:0006955;GO:0007155;GO:0005576;GO:0016020;GO:0005615;GO:0005829;GO:0005615;GO:0005615;GO:0005829;GO:0016020;GO:0005515;GO:0005125;GO:0005125;GO:000551	BP:immune response;BP:immune response;BP:cell adhesion;BP:defense response;BP:defense response;BP:immune response;BP:cell adhesion;CC:extracellular region;CC:membrane;CC:extracellular space;CC:cytosol;CC:extracellular space;CC:extracellular space;CC:cytosol;CC:membrane;MF:protein binding;MF:cytokine activity;MF:cytokine activity;MF:protein binding;	ENSG00000008517	IL32	interleukin 32 [Source:HGNC Symbol;Acc:HGNC:16830]	2775.05	461.725
GO:0016020;GO:007006	CC:membrane;CC:extracellular exosome;	ENSG00000008869	HEATR5B	HEAT repeat containing 5B [Source:HGNC Symbol;Acc:HGNC:29273]	1.865	5.105
GO:0006355;GO:0006351;GO:0006355;GO:0000122;GO:0030154;GO:0006366;GO:0009887;GO:0000122;GO:0030154;GO:0009887;GO:0005654;GO:0005634;GO:0005634;GO:0005634;GO:0005654;GO:0001227;GO:0043565;GO:0003700;GO:0003677;GO:0005515;GO:0000977;GO:0001227;GO:0000977;GO:000551	BP:regulation of transcription, DNA-templated;BP:transcription, DNA-templated;BP:regulation of transcription, DNA-templated;BP:negative regulation of transcription from RNA polymerase II promoter;BP:cell differentiation;BP:transcription from RNA polymerase II promoter;BP:animal organ morphogenesis;BP:negative regulation of transcription from RNA polymerase II promoter;BP:cell differentiation;BP:a…	ENSG00000010030	ETV7	ETS variant 7 [Source:HGNC Symbol;Acc:HGNC:18160]	65.53	2.27
GO:0006468;GO:0018108;GO:0005737;GO:0043231;GO:0005634;GO:0004674;GO:0004712;GO:0004713;GO:0005515;GO:0046872;GO:000552	BP:protein phosphorylation;BP:peptidyl-tyrosine phosphorylation;CC:cytoplasm;CC:intracellular membrane-bounded organelle;CC:nucleus;MF:protein serine/threonine kinase activity;MF:protein serine/threonine/tyrosine kinase activity;MF:protein tyrosine kinase activity;MF:protein binding;MF:metal ion binding;MF:ATP binding;	ENSG00000010219	DYRK4	dual specificity tyrosine phosphorylation regulated kinase 4 [Source:HGNC Symbol;Acc:HGNC:3095]	85.735	31.56
GO:0001701;GO:0010468;GO:0043086;GO:0007268;GO:0015031;GO:0048471;GO:0001540;GO:0019899;GO:000485	BP:in utero embryonic development;BP:regulation of gene expression;BP:negative regulation of catalytic activity;BP:chemical synaptic transmission;BP:protein transport;CC:perinuclear region of cytoplasm;MF:beta-amyloid binding;MF:enzyme binding;MF:enzyme inhibitor activity;	ENSG00000011132	APBA3	amyloid beta precursor protein binding family A member 3 [Source:HGNC Symbol;Acc:HGNC:580]	33.625	13.56
GO:0006355;GO:0048706;GO:0006355;GO:0005634;GO:0005634;GO:000827	BP:regulation of transcription, DNA-templated;BP:embryonic skeletal system development;BP:regulation of transcription, DNA-templated;CC:nucleus;CC:nucleus;MF:zinc ion binding;	ENSG00000011258	MBTD1	mbt domain containing 1 [Source:HGNC Symbol;Acc:HGNC:19866]	0.685	2.215
GO:0010457;GO:0033365;GO:0005737;GO:0005813;GO:0005634;GO:0030054;GO:0019901;GO:001990	BP:centriole-centriole cohesion;BP:protein localization to organelle;CC:cytoplasm;CC:centrosome;CC:nucleus;CC:cell junction;MF:protein kinase binding;MF:protein domain specific binding;	ENSG00000011523	CEP68	centrosomal protein 68 [Source:HGNC Symbol;Acc:HGNC:29076]	2.62	7.085
GO:1902042;GO:0031572;GO:0046600;GO:2000617;GO:0035067;GO:2000378;GO:0051574;GO:0008630;GO:0009048;GO:0031052;GO:0051571;GO:0071158;GO:0006349;GO:0016925;GO:0010212;GO:0071681;GO:0006301;GO:0030521;GO:0071356;GO:0000729;GO:0045766;GO:0070512;GO:0051865;GO:0006260;GO:0031398;GO:1901796;GO:0043009;GO:0043627;GO:0006303;GO:0042127;GO:0033147;GO:2000620;GO:0006281;GO:0007584;GO:0033160;GO:0032355;GO:…	BP:negative regulation of extrinsic apoptotic signaling pathway via death domain receptors;BP:G2 DNA damage checkpoint;BP:negative regulation of centriole replication;BP:positive regulation of histone H3-K9 acetylation;BP:negative regulation of histone acetylation;BP:negative regulation of reactive oxygen species metabolic process;BP:positive regulation of histone H3-K9 methylation;BP:intrinsic a…	ENSG00000012048	BRCA1	BRCA1, DNA repair associated [Source:HGNC Symbol;Acc:HGNC:1100]	1.8	5.04
GO:0008270;GO:000551	MF:zinc ion binding;MF:protein binding;	ENSG00000012211	PRICKLE3	prickle planar cell polarity protein 3 [Source:HGNC Symbol;Acc:HGNC:6645]	10.32	5.88
GO:0007584;GO:0045907;GO:2001300;GO:0002540;GO:0055093;GO:0019369;GO:0019370;GO:0019233;GO:0002526;GO:0019372;GO:0055114;GO:0042383;GO:0005615;GO:0005829;GO:0031965;GO:0030425;GO:0016363;GO:0005641;GO:0004051;GO:0005515;GO:000550	BP:response to nutrient;BP:positive regulation of vasoconstriction;BP:lipoxin metabolic process;BP:leukotriene production involved in inflammatory response;BP:response to hyperoxia;BP:arachidonic acid metabolic process;BP:leukotriene biosynthetic process;BP:sensory perception of pain;BP:acute inflammatory response;BP:lipoxygenase pathway;BP:oxidation-reduction process;CC:sarcolemma;CC:extracellul…	ENSG00000012779	ALOX5	arachidonate 5-lipoxygenase [Source:HGNC Symbol;Acc:HGNC:435]	0.375	0.03
GO:0030030;GO:1903358;GO:0072661;GO:0007596;GO:0001881;GO:0051260;GO:1903779;GO:1901387;GO:0086036;GO:0072661;GO:0060271;GO:0055117;GO:0015031;GO:0006810;GO:0060271;GO:0030030;GO:0007596;GO:0051260;GO:0090160;GO:0032456;GO:0034498;GO:1903358;GO:0001881;GO:0072661;GO:0086036;GO:0034498;GO:0086036;GO:0090160;GO:0032456;GO:0055038;GO:0030139;GO:0005925;GO:0043209;GO:0005634;GO:0048471;GO:0043209;GO:…	BP:cell projection organization;BP:regulation of Golgi organization;BP:protein targeting to plasma membrane;BP:blood coagulation;BP:receptor recycling;BP:protein homooligomerization;BP:regulation of cardiac conduction;BP:positive regulation of voltage-gated calcium channel activity;BP:regulation of cardiac muscle cell membrane potential;BP:protein targeting to plasma membrane;BP:cilium assembly;B…	ENSG00000013016	EHD3	EH domain containing 3 [Source:HGNC Symbol;Acc:HGNC:3244]	3.25	18.06
GO:0032436;GO:0034612;GO:0034341;GO:0016567;GO:0005634;GO:000551	BP:positive regulation of proteasomal ubiquitin-dependent protein catabolic process;BP:response to tumor necrosis factor;BP:response to interferon-gamma;BP:protein ubiquitination;CC:nucleus;MF:protein binding;	ENSG00000013374	NUB1	negative regulator of ubiquitin like proteins 1 [Source:HGNC Symbol;Acc:HGNC:17623]	62.115	26.275
GO:0045089;GO:0006351;GO:0006351;GO:0032728;GO:0005666;GO:0032549;GO:0003899;GO:0003677;GO:0032549;GO:0003899;GO:000367	BP:positive regulation of innate immune response;BP:transcription, DNA-templated;BP:transcription, DNA-templated;BP:positive regulation of interferon-beta production;CC:DNA-directed RNA polymerase III complex;MF:ribonucleoside binding;MF:DNA-directed RNA polymerase activity;MF:DNA binding;MF:ribonucleoside binding;MF:DNA-directed RNA polymerase activity;MF:DNA binding;	ENSG00000013503	POLR3B	RNA polymerase III subunit B [Source:HGNC Symbol;Acc:HGNC:30348]	1.555	4.21
GO:0031648;GO:0016055;GO:0051260;GO:0031098;GO:0001932;GO:0005737;GO:0030165;GO:004362	BP:protein destabilization;BP:Wnt signaling pathway;BP:protein homooligomerization;BP:stress-activated protein kinase signaling cascade;BP:regulation of protein phosphorylation;CC:cytoplasm;MF:PDZ domain binding;MF:protein self-association;	ENSG00000015133	CCDC88C	coiled-coil domain containing 88C [Source:HGNC Symbol;Acc:HGNC:19967]	2.63	11.13
GO:0090090;GO:0035414;GO:0035264;GO:0001649;GO:0000122;GO:0060993;GO:0008284;GO:0006469;GO:0060271;GO:0032835;GO:0031146;GO:0072307;GO:0035329;GO:0045599;GO:0010718;GO:0060390;GO:0016567;GO:0045944;GO:0017145;GO:0005737;GO:0005654;GO:0005667;GO:0003714;GO:0003713;GO:004280	BP:negative regulation of canonical Wnt signaling pathway;BP:negative regulation of catenin import into nucleus;BP:multicellular organism growth;BP:osteoblast differentiation;BP:negative regulation of transcription from RNA polymerase II promoter;BP:kidney morphogenesis;BP:positive regulation of cell proliferation;BP:negative regulation of protein kinase activity;BP:cilium assembly;BP:glomerulus …	ENSG00000018408	WWTR1	WW domain containing transcription regulator 1 [Source:HGNC Symbol;Acc:HGNC:24042]	51.47	130.96
GO:2000343;GO:0045059;GO:1902166;GO:0019882;GO:0048146;GO:0006955;GO:0002830;GO:0018108;GO:0045582;GO:0002606;GO:0007169;GO:0002906;GO:0016064;GO:0030890;GO:0090023;GO:0051085;GO:0001961;GO:0000187;GO:0019883;GO:0019886;GO:0006461;GO:0006952;GO:0001516;GO:0043518;GO:0045060;GO:0060907;GO:0045581;GO:0050731;GO:0002792;GO:0035691;GO:0043030;GO:0070374;GO:0006886;GO:0009897;GO:0016021;GO:0035693;GO:…	BP:positive regulation of chemokin;BP:positive thymic T cell selection;BP:negative regulation of intrinsic apoptotic signaling pathway in response to DNA damage by p53 class mediator;BP:antigen processing and presentation;BP:positive regulation of fibroblast proliferation;BP:immune response;BP:positive regulation of type 2 immune response;BP:peptidyl-tyrosine phosphorylation;BP:positive regulatio…	ENSG00000019582	CD74	CD74 molecule [Source:HGNC Symbol;Acc:HGNC:1697]	52.31	6.46
GO:2001234;GO:0032269;GO:0016477;GO:0006935;GO:0008283;GO:0045859;GO:0016043;GO:0001817;GO:0070887;GO:0018193;GO:0007166;GO:1902533;GO:0006508;GO:0048732;GO:0009653;GO:0001934;GO:0080135;GO:004340	BP:negative regulation of apoptotic signaling pathway;BP:negative regulation of cellular protein metabolic process;BP:cell migration;BP:chemotaxis;BP:cell proliferation;BP:regulation of protein kinase activity;BP:cellular component organization;BP:regulation of cytokine production;BP:cellular response to chemical stimulus;BP:peptidyl-amino acid modification;BP:cell surface receptor signaling path…	ENSG00000019991	HGF	hepatocyte growth factor [Source:HGNC Symbol;Acc:HGNC:4893]	1.04	0.385
GO:0006468;GO:0030154;GO:0045893;GO:0006366;GO:0048731;GO:0071559;GO:0048523;GO:0005737;GO:0005634;GO:0003700;GO:0097159;GO:1901363;GO:000551	BP:protein phosphorylation;BP:cell differentiation;BP:positive regulation of transcription, DNA-templated;BP:transcription from RNA polymerase II promoter;BP:system development;BP:response to transforming growth factor beta;BP:negative regulation of cellular process;CC:cytoplasm;CC:nucleus;MF:transcription factor activity, sequence-specific DNA binding;MF:organic cyclic compound binding;MF:hetero…	ENSG00000020633	RUNX3	runt related transcription factor 3 [Source:HGNC Symbol;Acc:HGNC:10473]	1.845	0.005
GO:0044267;GO:0032501;GO:0060544;GO:0032101;GO:2000116;GO:0033209;GO:0007249;GO:0043067;GO:0043066;GO:0031398;GO:0002224;GO:0002753;GO:1902531;GO:0051704;GO:0005737;GO:0043229;GO:0005654;GO:0005515;GO:000484	BP:cellular protein metabolic process;BP:multicellular organismal process;BP:regulation of necroptotic process;BP:regulation of response to external stimulus;BP:regulation of cysteine-type endopeptidase activity;BP:tumor necrosis factor-mediated signaling pathway;BP:I-kappaB kinase/NF-kappaB signaling;BP:regulation of programmed cell death;BP:negative regulation of apoptotic process;BP:positive r…	ENSG00000023445	BIRC3	baculoviral IAP repeat containing 3 [Source:HGNC Symbol;Acc:HGNC:591]	15.31	0.995
GO:0035556;GO:0010738;GO:0010738;GO:0043234;GO:0005886;GO:0005829;GO:0005730;GO:0005737;GO:0005856;GO:0005815;GO:0005777;GO:0005777;GO:0005815;GO:0051018;GO:0008157;GO:0008157;GO:0034236;GO:0032947;GO:003423	BP:intracellular signal transduction;BP:regulation of protein kinase A signaling;BP:regulation of protein kinase A signaling;CC:protein complex;CC:plasma membrane;CC:cytosol;CC:nucleolus;CC:cytoplasm;CC:cytoskeleton;CC:microtubule organizing center;CC:peroxisome;CC:peroxisome;CC:microtubule organizing center;MF:protein kinase A binding;MF:protein phosphatase 1 binding;MF:protein phosphatase 1 bin…	ENSG00000023516	AKAP11	A-kinase anchoring protein 11 [Source:HGNC Symbol;Acc:HGNC:369]	1.225	3.66
GO:0006220;GO:0030154;GO:0000002;GO:0006935;GO:0006206;GO:0006213;GO:0043097;GO:0006260;GO:0046135;GO:0008152;GO:0006206;GO:0006213;GO:0001525;GO:0005829;GO:0016154;GO:0005161;GO:0004645;GO:0016757;GO:0016763;GO:0004645;GO:0009032;GO:000808	BP:pyrimidine nucleotide metabolic process;BP:cell differentiation;BP:mitochondrial genome maintenance;BP:chemotaxis;BP:pyrimidine nucleobase metabolic process;BP:pyrimidine nucleoside metabolic process;BP:pyrimidine nucleoside salvage;BP:DNA replication;BP:pyrimidine nucleoside catabolic process;BP:metabolic process;BP:pyrimidine nucleobase metabolic process;BP:pyrimidine nucleoside metabolic pr…	ENSG00000025708	TYMP	thymidine phosphorylase [Source:HGNC Symbol;Acc:HGNC:3148]	41.25	9.89
GO:0000723;GO:0010569;GO:1904358;GO:1904355;GO:0032508;GO:1902990;GO:1904506;GO:0000723;GO:0006281;GO:0032508;GO:0006139;GO:0006281;GO:0006974;GO:0006260;GO:0006310;GO:0000723;GO:0010569;GO:0006260;GO:0000732;GO:0031297;GO:1904430;GO:1904535;GO:0005634;GO:0005654;GO:0005634;GO:0005634;GO:0051539;GO:0004003;GO:0003677;GO:0016818;GO:0008026;GO:0004386;GO:0004003;GO:0003677;GO:0016787;GO:0005524;GO:…	BP:telomere maintenance;BP:regulation of double-strand break repair via homologous recombination;BP:positive regulation of telomere maintenance via telomere lengthening;BP:positive regulation of telomere capping;BP:DNA duplex unwinding;BP:mitotic telomere maintenance via semi-conservative replication;BP:negative regulation of telomere maintenance in response to DNA damage;BP:telomere maintenance;…	ENSG00000026036	RTEL1-TNFRSF6B	RTEL1-TNFRSF6B readthrough (NMD candidate) [Source:HGNC Symbol;Acc:HGNC:44095]	5.43	1.615
GO:0021537;GO:0006925;GO:0006924;GO:0007623;GO:0006954;GO:0071234;GO:0071333;GO:0070230;GO:0033209;GO:0003014;GO:0060135;GO:0032496;GO:1902042;GO:0046898;GO:0002377;GO:0042493;GO:0009636;GO:0070848;GO:0071347;GO:1902617;GO:0071455;GO:0071456;GO:0048536;GO:0032464;GO:0043009;GO:2001241;GO:0010468;GO:0042127;GO:0019724;GO:0071279;GO:0031104;GO:0006919;GO:0070301;GO:0071391;GO:0043410;GO:0007283;GO:…	BP:telencephalon development;BP:inflammatory cell apoptotic process;BP:activation-induced cell death of T cells;BP:circadian rhythm;BP:inflammatory response;BP:cellular response to phenylalanine;BP:cellular response to glucose stimulus;BP:positive regulation of lymphocyte apoptotic process;BP:tumor necrosis factor-mediated signaling pathway;BP:renal system process;BP:maternal process involved in …	ENSG00000026103	FAS	Fas cell surface death receptor [Source:HGNC Symbol;Acc:HGNC:11920]	6.84	2.675
GO:0051092;GO:0018105;GO:0050861;GO:0034351;GO:0060252;GO:2000810;GO:0045618;GO:0010744;GO:0035556;GO:0005829;GO:0005911;GO:0005886;GO:0070062;GO:0017160;GO:0046872;GO:0004697;GO:000552	BP:positive regulation of NF-kappaB transcription factor activity;BP:peptidyl-serine phosphorylation;BP:positive regulation of B cell receptor signaling pathway;BP:negative regulation of glial cell apoptotic process;BP:positive regulation of glial cell proliferation;BP:regulation of bicellular tight junction assembly;BP:positive regulation of keratinocyte differentiation;BP:positive regulation of…	ENSG00000027075	PRKCH	protein kinase C eta [Source:HGNC Symbol;Acc:HGNC:9403]	13.125	50.135
GO:0071222;GO:0033209;GO:0097191;GO:0051044;GO:0042981;GO:0007275;GO:0050728;GO:0042127;GO:0043410;GO:0006955;GO:0007568;GO:0071363;GO:0008630;GO:0050779;GO:0016021;GO:0048471;GO:0043025;GO:0005887;GO:0043196;GO:0045121;GO:0005576;GO:0005634;GO:0005031;GO:003162	BP:cellular response to lipopolysaccharide;BP:tumor necrosis factor-mediated signaling pathway;BP:extrinsic apoptotic signaling pathway;BP:positive regulation of membrane protein ectodomain proteolysis;BP:regulation of apoptotic process;BP:multicellular organism development;BP:negative regulation of inflammatory response;BP:regulation of cell proliferation;BP:positive regulation of MAPK cascade;B…	ENSG00000028137	TNFRSF1B	TNF receptor superfamily member 1B [Source:HGNC Symbol;Acc:HGNC:11917]	86.5	57.275
GO:0009649;GO:0006355;GO:0042753;GO:0045944;GO:0005737;GO:0005730;GO:0005634;GO:0005667;GO:0003700;GO:0070888;GO:0046983;GO:000098	BP:entrainment of circadian clock;BP:regulation of transcription, DNA-templated;BP:positive regulation of circadian rhythm;BP:positive regulation of transcription from RNA polymerase II promoter;CC:cytoplasm;CC:nucleolus;CC:nucleus;CC:transcription factor complex;MF:transcription factor activity, sequence-specific DNA binding;MF:E-box binding;MF:protein dimerization activity;MF:transcription fact…	ENSG00000029153	ARNTL2	aryl hydrocarbon receptor nuclear translocator like 2 [Source:HGNC Symbol;Acc:HGNC:18984]	15.81	11.845
GO:0009314;GO:0071260;GO:0097192;GO:0097193;GO:0001836;GO:0034644;GO:0009653;GO:0042981;GO:0007005;GO:0019835;GO:0097202;GO:0008283;GO:0043065;GO:0048513;GO:0032469;GO:0071214;GO:0006919;GO:0006874;GO:0006811;GO:0006987;GO:0070227;GO:0001776;GO:0042221;GO:0043393;GO:0010605;GO:0008630;GO:1901700;GO:0010248;GO:0051881;GO:0009605;GO:0070059;GO:0043496;GO:0043497;GO:1903896;GO:1902589;GO:0042981;GO:…	BP:response to radiation;BP:cellular response to mechanical stimulus;BP:extrinsic apoptotic signaling pathway in absence of ligand;BP:intrinsic apoptotic signaling pathway;BP:release of cytochrome c from mitochondria;BP:cellular response to UV;BP:anatomical structure morphogenesis;BP:regulation of apoptotic process;BP:mitochondrion organization;BP:cytolysis;BP:activation of cysteine-type endopept…	ENSG00000030110	BAK1	BCL2 antagonist/killer 1 [Source:HGNC Symbol;Acc:HGNC:949]	93.6	23.87
GO:000716	BP:signal transduction;	ENSG00000031081	ARHGAP31	Rho GTPase activating protein 31 [Source:HGNC Symbol;Acc:HGNC:29216]	25.735	14.17
GO:0034080;GO:0034080;GO:0007062;GO:0051310;GO:1905342;GO:0007062;GO:0015629;GO:0005694;GO:0005654;GO:0005634;GO:0000775;GO:0005829;GO:0005654;GO:0015629;GO:0005829;GO:0005654;GO:000077	BP:CENP-A containing nucleosome assembly;BP:CENP-A containing nucleosome assembly;BP:sister chromatid cohesion;BP:metaphase plate congression;BP:positive regulation of protein localization to kinetochore;BP:sister chromatid cohesion;CC:actin cytoskeleton;CC:chromosome;CC:nucleoplasm;CC:nucleus;CC:chromosome, centromeric region;CC:cytosol;CC:nucleoplasm;CC:actin cytoskeleton;CC:cytosol;CC:nucleopl…	ENSG00000031691	CENPQ	centromere protein Q [Source:HGNC Symbol;Acc:HGNC:21347]	0.495	1.69
GO:0016575;GO:0006349;GO:0034773;GO:0097368;GO:0036124;GO:0007283;GO:0045892;GO:0048821;GO:0045944;GO:0080182;GO:0017053;GO:0005654;GO:0044212;GO:0004407;GO:000370	BP:histone deacetylation;BP:regulation of gene expression by genetic imprinting;BP:histone H4-K20 trimethylation;BP:establishment of Sertoli cell barrier;BP:histone H3-K9 trimethylation;BP:spermatogenesis;BP:negative regulation of transcription, DNA-templated;BP:erythrocyte development;BP:positive regulation of transcription from RNA polymerase II promoter;BP:histone H3-K4 trimethylation;CC:trans…	ENSG00000032219	ARID4A	AT-rich interaction domain 4A [Source:HGNC Symbol;Acc:HGNC:9885]	1.125	2.53
GO:003151	CC:motile cilium;	ENSG00000032742	IFT88	intraflagellar transport 88 [Source:HGNC Symbol;Acc:HGNC:20606]	0.545	1.94
GO:0015701;GO:0051453;GO:0098656;GO:0015698;GO:0060117;GO:0005887;GO:000545	BP:bicarbonate transport;BP:regulation of intracellular pH;BP:anion transmembrane transport;BP:inorganic anion transport;BP:auditory receptor cell development;CC:integral component of plasma membrane;MF:inorganic anion exchanger activity;	ENSG00000033867	SLC4A7	solute carrier family 4 member 7 [Source:HGNC Symbol;Acc:HGNC:11033]	1.54	6.02
GO:0030488;GO:0036265;GO:0032259;GO:0008033;GO:0006400;GO:0005737;GO:0005730;GO:0005654;GO:0005634;GO:0043527;GO:0000049;GO:0008176;GO:0106004;GO:0016740;GO:0008168;GO:0003723;GO:0000049;GO:0008176;GO:0008176;GO:000551	BP:tRNA methylation;BP:RN;BP:methylation;BP:tRNA processing;BP:tRNA modification;CC:cytoplasm;CC:nucleolus;CC:nucleoplasm;CC:nucleus;CC:tRNA methyltransferase complex;MF:tRNA binding;MF:tRN;MF:old GO;MF:transferase activity;MF:methyltransferase activity;MF:RNA binding;MF:tRNA binding;MF:tRN;MF:tRN;MF:protein binding;	ENSG00000037897	METTL1	methyltransferase like 1 [Source:HGNC Symbol;Acc:HGNC:7030]	16.99	9.455
GO:0030154;GO:0001501;GO:0006508;GO:0006508;GO:0022617;GO:0005576;GO:0004252;GO:0004222;GO:0005509;GO:0004222;GO:0008237;GO:000827	BP:cell differentiation;BP:skeletal system development;BP:proteolysis;BP:proteolysis;BP:extracellular matrix disassembly;CC:extracellular region;MF:serine-type endopeptidase activity;MF:metalloendopeptidase activity;MF:calcium ion binding;MF:metalloendopeptidase activity;MF:metallopeptidase activity;MF:zinc ion binding;	ENSG00000038295	TLL1	tolloid like 1 [Source:HGNC Symbol;Acc:HGNC:11843]	0.16	0.685
GO:0007507;GO:0021670;GO:0030317;GO:0036158;GO:0003341;GO:0007368;GO:0005737;GO:0036157;GO:0005874;GO:0005524;GO:0016887;GO:000377	BP:heart development;BP:lateral ventricle development;BP:flagellated sperm motility;BP:outer dynein arm assembly;BP:cilium movement;BP:determination of left/right symmetry;CC:cytoplasm;CC:outer dynein arm;CC:microtubule;MF:ATP binding;MF:ATPase activity;MF:microtubule motor activity;	ENSG00000039139	DNAH5	dynein axonemal heavy chain 5 [Source:HGNC Symbol;Acc:HGNC:2950]	0.185	0.545
GO:0007616;GO:0015811;GO:0002088;GO:0008542;GO:0006520;GO:0006749;GO:0007625;GO:0046034;GO:0007628;GO:0042438;GO:0055085;GO:0007420;GO:0050890;GO:0005770;GO:0045111;GO:0070062;GO:0016021;GO:0005886;GO:0042470;GO:0005765;GO:0005769;GO:001518	BP:long-term memory;BP:L-cystine transport;BP:lens development in camera-type eye;BP:visual learning;BP:cellular amino acid metabolic process;BP:glutathione metabolic process;BP:grooming behavior;BP:ATP metabolic process;BP:adult walking behavior;BP:melanin biosynthetic process;BP:transmembrane transport;BP:brain development;BP:cognition;CC:late endosome;CC:intermediate filament cytoskeleton;CC:e…	ENSG00000040531	CTNS	cystinosin, lysosomal cystine transporter [Source:HGNC Symbol;Acc:HGNC:2518]	29.955	16.06
GO:0050663;GO:0050852;GO:0038095;GO:0007169;GO:0035556;GO:0045860;GO:0030168;GO:0045576;GO:0005829;GO:0036398;GO:0005911;GO:0044853;GO:000551	BP:cytokine secretion;BP:T cell receptor signaling pathway;BP:Fc-epsilon receptor signaling pathway;BP:transmembrane receptor protein tyrosine kinase signaling pathway;BP:intracellular signal transduction;BP:positive regulation of protein kinase activity;BP:platelet activation;BP:mast cell activation;CC:cytosol;CC:TCR signalosome;CC:cell-cell junction;CC:plasma membrane raft;MF:protein binding;	ENSG00000043462	LCP2	lymphocyte cytosolic protein 2 [Source:HGNC Symbol;Acc:HGNC:6529]	1.245	0.035
GO:0043547;GO:0048813;GO:0035023;GO:0014065;GO:0007186;GO:0008344;GO:0005886;GO:0005622;GO:0030676;GO:0005089;GO:000509	BP:positive regulation of GTPase activity;BP:dendrite morphogenesis;BP:regulation of Rho protein signal transduction;BP:phosphatidylinositol 3-kinase signaling;BP:G-protein coupled receptor signaling pathway;BP:adult locomotory behavior;CC:plasma membrane;CC:intracellular;MF:Rac guanyl-nucleotide exchange factor activity;MF:Rho guanyl-nucleotide exchange factor activity;MF:GTPase activator activi…	ENSG00000046889	PREX2	phosphatidylinositol-3,4,5-trisphosphate dependent Rac exchange factor 2 [Source:HGNC Symbol;Acc:HGNC:22950]	6.725	21.67
GO:0032438;GO:0007596;GO:0060155;GO:0010628;GO:0043506;GO:0014059;GO:0060159;GO:0031532;GO:0048490;GO:0001956;GO:0048812;GO:0030426;GO:0005789;GO:0030054;GO:0005737;GO:0005634;GO:1904115;GO:0010008;GO:0033162;GO:0042383;GO:0045211;GO:0014069;GO:0030672;GO:0031083;GO:0043197;GO:0016528;GO:000551	BP:melanosome organization;BP:blood coagulation;BP:platelet dense granule organization;BP:positive regulation of gene expression;BP:regulation of JUN kinase activity;BP:regulation of dopamine secretion;BP:regulation of dopamine receptor signaling pathway;BP:actin cytoskeleton reorganization;BP:anterograde synaptic vesicle transport;BP:positive regulation of neurotransmitter secretion;BP:neuron pr…	ENSG00000047579	DTNBP1	dystrobrevin binding protein 1 [Source:HGNC Symbol;Acc:HGNC:17328]	25.6	14.39
GO:0051056;GO:0007165;GO:0043547;GO:0007015;GO:0051497;GO:0009967;GO:0007202;GO:0030041;GO:0007266;GO:0051895;GO:0005829;GO:0005884;GO:0005070;GO:0005096;GO:0017124;GO:0043274;GO:001600	BP:regulation of small GTPase mediated signal transduction;BP:signal transduction;BP:positive regulation of GTPase activity;BP:actin filament organization;BP:negative regulation of stress fiber assembly;BP:positive regulation of signal transduction;BP:activation of phospholipase C activity;BP:actin filament polymerization;BP:Rho protein signal transduction;BP:negative regulation of focal adhesion…	ENSG00000047648	ARHGAP6	Rho GTPase activating protein 6 [Source:HGNC Symbol;Acc:HGNC:676]	0.28	1.425
GO:0046579;GO:0097192;GO:0008584;GO:0043406;GO:0001755;GO:0002763;GO:0001541;GO:0002687;GO:1902035;GO:0045740;GO:0046854;GO:0070668;GO:0035234;GO:0007155;GO:0014066;GO:0035162;GO:0050731;GO:0043547;GO:0007155;GO:0033026;GO:0045636;GO:0005856;GO:0005615;GO:0016021;GO:0005737;GO:0005886;GO:0016020;GO:0005088;GO:0005125;GO:0046934;GO:0005173;GO:0008083;GO:000517	BP:positive regulation of Ras protein signal transduction;BP:extrinsic apoptotic signaling pathway in absence of ligand;BP:male gonad development;BP:positive regulation of MAP kinase activity;BP:neural crest cell migration;BP:positive regulation of myeloid leukocyte differentiation;BP:ovarian follicle development;BP:positive regulation of leukocyte migration;BP:positive regulation of hematopoieti…	ENSG00000049130	KITLG	KIT ligand [Source:HGNC Symbol;Acc:HGNC:6343]	1.485	4.715
GO:0006508;GO:0005578;GO:0004222;GO:000827	BP:proteolysis;CC:proteinaceous extracellular matrix;MF:metalloendopeptidase activity;MF:zinc ion binding;	ENSG00000049192	ADAMTS6	ADAM metallopeptidase with thrombospondin type 1 motif 6 [Source:HGNC Symbol;Acc:HGNC:222]	0.88	5.275
GO:0032922;GO:0000122;GO:0045187;GO:0005737;GO:0005634;GO:0031625;GO:001990	BP:circadian regulation of gene expression;BP:negative regulation of transcription from RNA polymerase II promoter;BP:regulation of circadian sleep/wake cycle, sleep;CC:cytoplasm;CC:nucleus;MF:ubiquitin protein ligase binding;MF:kinase binding;	ENSG00000049246	PER3	period circadian clock 3 [Source:HGNC Symbol;Acc:HGNC:8847]	0.375	0.705
GO:0042127;GO:0008285;GO:0050710;GO:0006954;GO:0050794;GO:0008625;GO:0006955;GO:0032496;GO:0042981;GO:0007275;GO:0044699;GO:0006915;GO:0008285;GO:0016020;GO:0005887;GO:0016021;GO:0016020;GO:0009897;GO:0005031;GO:000487	BP:regulation of cell proliferation;BP:negative regulation of cell proliferation;BP:negative regulation of cytokine secretion;BP:inflammatory response;BP:regulation of cellular process;BP:extrinsic apoptotic signaling pathway via death domain receptors;BP:immune response;BP:response to lipopolysaccharide;BP:regulation of apoptotic process;BP:multicellular organism development;BP:single-organism p…	ENSG00000049249	TNFRSF9	TNF receptor superfamily member 9 [Source:HGNC Symbol;Acc:HGNC:11924]	3.995	0.2
GO:0055010;GO:0050684;GO:0001822;GO:0048747;GO:0001889;GO:0007005;GO:0050684;GO:0005739;GO:0005739;GO:0044822;GO:000551	BP:ventricular cardiac muscle tissue morphogenesis;BP:regulation of mRNA processing;BP:kidney development;BP:muscle fiber development;BP:liver development;BP:mitochondrion organization;BP:regulation of mRNA processing;CC:mitochondrion;CC:mitochondrion;MF:pol;MF:protein binding;	ENSG00000049883	PTCD2	pentatricopeptide repeat domain 2 [Source:HGNC Symbol;Acc:HGNC:25734]	0.405	2.58
GO:0051091;GO:0002408;GO:0043547;GO:0071803;GO:0051496;GO:1904591;GO:0035023;GO:0043507;GO:0070372;GO:0005737;GO:0002102;GO:0005886;GO:0005622;GO:0005654;GO:0042995;GO:0030054;GO:0005089;GO:0008289;GO:0005515;GO:000552	BP:positive regulation of sequence-specific DNA binding transcription factor activity;BP:myeloid dendritic cell chemotaxis;BP:positive regulation of GTPase activity;BP:positive regulation of podosome assembly;BP:positive regulation of stress fiber assembly;BP:positive regulation of protein import;BP:regulation of Rho protein signal transduction;BP:positive regulation of JUN kinase activity;BP:reg…	ENSG00000050327	ARHGEF5	Rho guanine nucleotide exchange factor 5 [Source:HGNC Symbol;Acc:HGNC:13209]	1.07	0.41
GO:0002756;GO:0071222;GO:0006954;GO:0034142;GO:0043124;GO:0043124;GO:0071222;GO:003159	BP:MyD88-independent toll-like receptor signaling pathway;BP:cellular response to lipopolysaccharide;BP:inflammatory response;BP:toll-like receptor 4 signaling pathway;BP:negative regulation of I-kappaB kinase/NF-kappaB signaling;BP:negative regulation of I-kappaB kinase/NF-kappaB signaling;BP:cellular response to lipopolysaccharide;MF:polyubiquitin binding;	ENSG00000050730	TNIP3	TNFAIP3 interacting protein 3 [Source:HGNC Symbol;Acc:HGNC:19315]	1.38	0.615
GO:0006633;GO:0006695;GO:0055114;GO:0016021;GO:0005789;GO:0005886;GO:0016021;GO:0016020;GO:0004497;GO:0000254;GO:0005506;GO:001649	BP:fatty acid biosynthetic process;BP:cholesterol biosynthetic process;BP:oxidation-reduction process;CC:integral component of membrane;CC:endoplasmic reticulum membrane;CC:plasma membrane;CC:integral component of membrane;CC:membrane;MF:monooxygenase activity;MF:C-4 methylsterol oxidase activity;MF:iron ion binding;MF:oxidoreductase activity;	ENSG00000052802	MSMO1	methylsterol monooxygenase 1 [Source:HGNC Symbol;Acc:HGNC:10545]	11.155	33.12
GO:0048671;GO:0061000;GO:0031549;GO:0030141;GO:0005576;GO:0005509;GO:004840	BP:negative regulation of collateral sprouting;BP:negative regulation of dendritic spine development;BP:negative regulation of brain-derived neurotrophic factor receptor signaling pathway;CC:secretory granule;CC:extracellular region;MF:calcium ion binding;MF:brain-derived neurotrophic factor binding;	ENSG00000053108	FSTL4	follistatin like 4 [Source:HGNC Symbol;Acc:HGNC:21389]	0.02	0.33
GO:0051092;GO:2001236;GO:0006461;GO:0010803;GO:0042981;GO:0042981;GO:0007165;GO:0006915;GO:0051092;GO:0051092;GO:0006461;GO:0010803;GO:2001236;GO:0007165;GO:0005829;GO:0005829;GO:0005737;GO:0031625;GO:0031996;GO:0005164;GO:0008270;GO:0005515;GO:0008270;GO:0042802;GO:0005515;GO:0031625;GO:0031996;GO:000516	BP:positive regulation of NF-kappaB transcription factor activity;BP:regulation of extrinsic apoptotic signaling pathway;BP:protein complex assembly;BP:regulation of tumor necrosis factor-mediated signaling pathway;BP:regulation of apoptotic process;BP:regulation of apoptotic process;BP:signal transduction;BP:apoptotic process;BP:positive regulation of NF-kappaB transcription factor activity;BP:p…	ENSG00000056558	TRAF1	TNF receptor associated factor 1 [Source:HGNC Symbol;Acc:HGNC:12031]	60.035	2.725
GO:0048305;GO:0002230;GO:0001783;GO:0006959;GO:0043123;GO:0005623;GO:000510	BP:immunoglobulin secretion;BP:positive regulation of defense response to virus by host;BP:B cell apoptotic process;BP:humoral immune response;BP:positive regulation of I-kappaB kinase/NF-kappaB signaling;CC:cell;MF:receptor binding;	ENSG00000056972	TRAF3IP2	TRAF3 interacting protein 2 [Source:HGNC Symbol;Acc:HGNC:1343]	5.095	11.94
GO:0030522;GO:0030308;GO:0042060;GO:0009986;GO:0005887;GO:000551	BP:intracellular receptor signaling pathway;BP:negative regulation of cell growth;BP:wound healing;CC:cell surface;CC:integral component of plasma membrane;MF:protein binding;	ENSG00000057019	DCBLD2	discoidin, CUB and LCCL domain containing 2 [Source:HGNC Symbol;Acc:HGNC:24627]	4.33	12.79
GO:0034379;GO:0010878;GO:0033344;GO:0034435;GO:0042632;GO:0042986;GO:0010742;GO:0008203;GO:0005783;GO:0016021;GO:0016020;GO:0016021;GO:0005789;GO:0015485;GO:0008374;GO:0000062;GO:0034736;GO:000551	BP:very-low-density lipoprotein particle assembly;BP:cholesterol storage;BP:cholesterol efflux;BP:cholesterol esterification;BP:cholesterol homeostasis;BP:positive regulation of amyloid precursor protein biosynthetic process;BP:macrophage derived foam cell differentiation;BP:cholesterol metabolic process;CC:endoplasmic reticulum;CC:integral component of membrane;CC:membrane;CC:integral component …	ENSG00000057252	SOAT1	sterol O-acyltransferase 1 [Source:HGNC Symbol;Acc:HGNC:11177]	10.15	6.225
GO:0016337;GO:0055010;GO:0034334;GO:2000810;GO:0086064;GO:0045110;GO:0008285;GO:0090002;GO:0010765;GO:0030336;GO:0055088;GO:0086019;GO:0002159;GO:0016264;GO:0086073;GO:0086091;GO:0048496;GO:0098911;GO:0005886;GO:0014704;GO:0030057;GO:0030054;GO:0016021;GO:0005654;GO:0005882;GO:0005912;GO:0044325;GO:0005080;GO:0032947;GO:0017080;GO:0019215;GO:0045294;GO:008608	BP:single organismal cell-cell adhesion;BP:ventricular cardiac muscle tissue morphogenesis;BP:adherens junction maintenance;BP:regulation of bicellular tight junction assembly;BP:cell communication by electrical coupling involved in cardiac conduction;BP:intermediate filament bundle assembly;BP:negative regulation of cell proliferation;BP:establishment of protein localization to plasma membrane;B…	ENSG00000057294	PKP2	plakophilin 2 [Source:HGNC Symbol;Acc:HGNC:9024]	0.29	0.955
GO:0060576;GO:0003281;GO:0009791;GO:0001763;GO:0060976;GO:1990654;GO:0003170;GO:0000122;GO:0048869;GO:0032259;GO:0042462;GO:0060707;GO:0030889;GO:0007281;GO:0001893;GO:0045165;GO:0031665;GO:0045579;GO:0010628;GO:0035904;GO:0048844;GO:0005737;GO:0005634;GO:0005654;GO:0003676;GO:0008168;GO:0001078;GO:0046872;GO:0042826;GO:0003700;GO:000097	BP:intestinal epithelial cell development;BP:ventricular septum development;BP:post-embryonic development;BP:morphogenesis of a branching structure;BP:coronary vasculature development;BP:sebum secreting cell proliferation;BP:heart valve development;BP:negative regulation of transcription from RNA polymerase II promoter;BP:cellular developmental process;BP:methylation;BP:eye photoreceptor cell dev…	ENSG00000057657	PRDM1	PR/SET domain 1 [Source:HGNC Symbol;Acc:HGNC:9346]	0.865	0.295
GO:001602	CC:integral component of membrane;	ENSG00000057704	TMCC3	transmembrane and coiled-coil domain family 3 [Source:HGNC Symbol;Acc:HGNC:29199]	0.595	7.065
GO:1904378;GO:0008283;GO:1904294;GO:0030318;GO:0050821;GO:0006355;GO:0006511;GO:0010506;GO:0070536;GO:0031625;GO:0070628;GO:1904288;GO:0051087;GO:0004197;GO:0043130;GO:0008270;GO:1904454;GO:000484	BP:maintenance of unfolded protein involved in ERAD pathway;BP:cell proliferation;BP:positive regulation of ERAD pathway;BP:melanocyte differentiation;BP:protein stabilization;BP:regulation of transcription, DNA-templated;BP:ubiquitin-dependent protein catabolic process;BP:regulation of autophagy;BP:protein K63-linked deubiquitination;MF:ubiquitin protein ligase binding;MF:proteasome binding;MF:B…	ENSG00000058056	USP13	ubiquitin specific peptidase 13 (isopeptidase T-3) [Source:HGNC Symbol;Acc:HGNC:12611]	1.945	5.215
GO:0005634;GO:0003950;GO:0044822;GO:004687	CC:nucleus;MF:NAD+ ADP-ribosyltransferase activity;MF:pol;MF:metal ion binding;	ENSG00000059378	PARP12	poly(ADP-ribose) polymerase family member 12 [Source:HGNC Symbol;Acc:HGNC:21919]	80.9	40.34
GO:0042127;GO:0006468;GO:0006468;GO:0038083;GO:0030154;GO:0007169;GO:0016477;GO:0045087;GO:0016021;GO:0031234;GO:0005886;GO:0005524;GO:0004672;GO:0004715;GO:0004672;GO:0005102;GO:000552	BP:regulation of cell proliferation;BP:protein phosphorylation;BP:protein phosphorylation;BP:peptidyl-tyrosine autophosphorylation;BP:cell differentiation;BP:transmembrane receptor protein tyrosine kinase signaling pathway;BP:cell migration;BP:innate immune response;CC:integral component of membrane;CC:extrinsic component of cytoplasmic side of plasma membrane;CC:plasma membrane;MF:ATP binding;MF…	ENSG00000060140	STYK1	serine/threonine/tyrosine kinase 1 [Source:HGNC Symbol;Acc:HGNC:18889]	1.55	4.53
GO:0038003;GO:0001558;GO:0005737;GO:0005634;GO:0016020;GO:0016020;GO:0005515;GO:0004872;GO:0004872;GO:000498	BP:opioid receptor signaling pathway;BP:regulation of cell growth;CC:cytoplasm;CC:nucleus;CC:membrane;CC:membrane;MF:protein binding;MF:receptor activity;MF:receptor activity;MF:opioid receptor activity;	ENSG00000060491	OGFR	opioid growth factor receptor [Source:HGNC Symbol;Acc:HGNC:15768]	149.24	60.27
GO:0090305;GO:0006388;GO:0005737;GO:0005813;GO:0005654;GO:0004518;GO:000551	BP:nucleic acid phosphodiester bond hydrolysis;BP:tRNA splicing, via endonucleolytic cleavage and ligation;CC:cytoplasm;CC:centrosome;CC:nucleoplasm;MF:nuclease activity;MF:protein binding;	ENSG00000060982	BCAT1	branched chain amino acid transaminase 1 [Source:HGNC Symbol;Acc:HGNC:976]	8.335	26.62
GO:0006355;GO:0006355;GO:0005634;GO:0005622;GO:0005622;GO:0003700;GO:0003676;GO:0003677;GO:0046872;GO:000367	BP:regulation of transcription, DNA-templated;BP:regulation of transcription, DNA-templated;CC:nucleus;CC:intracellular;CC:intracellular;MF:transcription factor activity, sequence-specific DNA binding;MF:nucleic acid binding;MF:DNA binding;MF:metal ion binding;MF:nucleic acid binding;	ENSG00000062370	ZNF112	zinc finger protein 112 [Source:HGNC Symbol;Acc:HGNC:12892]	0.52	1.805
GO:0002281;GO:1990830;GO:0071348;GO:0071354;GO:0050727;GO:0072675;GO:0061430;GO:0045892;GO:0045944;GO:0071222;GO:003028	BP:macrophage activation involved in immune response;BP:cellular response to leukemia inhibitory factor;BP:cellular response to interleukin-11;BP:cellular response to interleukin-6;BP:regulation of inflammatory response;BP:osteoclast fusion;BP:bone trabecula morphogenesis;BP:negative regulation of transcription, DNA-templated;BP:positive regulation of transcription from RNA polymerase II promoter…	ENSG00000064932	SBNO2	strawberry notch homolog 2 [Source:HGNC Symbol;Acc:HGNC:29158]	160.465	26.26
GO:0016322;GO:0006929;GO:0048013;GO:0005737;GO:0005654;GO:0043005;GO:000551	BP:neuron remodeling;BP:substrate-dependent cell migration;BP:ephrin receptor signaling pathway;CC:cytoplasm;CC:nucleoplasm;CC:neuron projection;MF:protein binding;	ENSG00000064999	ANKS1A	ankyrin repeat and sterile alpha motif domain containing 1A [Source:HGNC Symbol;Acc:HGNC:20961]	3.9	13.035
GO:0000462;GO:0034388;GO:0032040;GO:0005730;GO:0031965;GO:0005654;GO:0044822;GO:003051	BP:maturation of SSU-rRNA from tricistronic rRNA transcrip;CC:Pwp2p-containing subcomplex of 90S preribosome;CC:small-subunit processome;CC:nucleolus;CC:nuclear membrane;CC:nucleoplasm;MF:pol;MF:snoRNA binding;	ENSG00000065183	WDR3	WD repeat domain 3 [Source:HGNC Symbol;Acc:HGNC:12755]	3.705	8.335
GO:0008284;GO:0030334;GO:0016337;GO:2000147;GO:0040023;GO:0042472;GO:0006915;GO:0045773;GO:0033564;GO:0030517;GO:0001764;GO:0060603;GO:0006930;GO:0032488;GO:0005737;GO:0005576;GO:0005604;GO:000551	BP:positive regulation of cell proliferation;BP:regulation of cell migration;BP:single organismal cell-cell adhesion;BP:positive regulation of cell motility;BP:establishment of nucleus localization;BP:inner ear morphogenesis;BP:apoptotic process;BP:positive regulation of axon extension;BP:anterior/posterior axon guidance;BP:negative regulation of axon extension;BP:neuron migration;BP:mammary glan…	ENSG00000065320	NTN1	netrin 1 [Source:HGNC Symbol;Acc:HGNC:8029]	0.295	0.075
GO:0008283;GO:0006270;GO:0000082;GO:0006974;GO:0006260;GO:0005737;GO:0005654;GO:0005730;GO:0031298;GO:0019899;GO:0003688;GO:0046872;GO:0003697;GO:004280	BP:cell proliferation;BP:DNA replication initiation;BP:G1/S transition of mitotic cell cycle;BP:cellular response to DNA damage stimulus;BP:DNA replication;CC:cytoplasm;CC:nucleoplasm;CC:nucleolus;CC:replication fork protection complex;MF:enzyme binding;MF:DNA replication origin binding;MF:metal ion binding;MF:single-stranded DNA binding;MF:identical protein binding;	ENSG00000065328	MCM10	minichromosome maintenance 10 replication initiation factor [Source:HGNC Symbol;Acc:HGNC:18043]	0.9	4
GO:0031338;GO:0043547;GO:0006886;GO:0090630;GO:1902017;GO:0006886;GO:0031338;GO:0090630;GO:0005622;GO:0012505;GO:0005622;GO:0012505;GO:0005096;GO:0017137;GO:0071889;GO:0005515;GO:0005096;GO:0005096;GO:0017137;GO:0005515;GO:007188	BP:regulation of vesicle fusion;BP:positive regulation of GTPase activity;BP:intracellular protein transport;BP:activation of GTPase activity;BP:regulation of cilium assembly;BP:intracellular protein transport;BP:regulation of vesicle fusion;BP:activation of GTPase activity;CC:intracellular;CC:endomembrane system;CC:intracellular;CC:endomembrane system;MF:GTPase activator activity;MF:Rab GTPase b…	ENSG00000065491	TBC1D22B	TBC1 domain family member 22B [Source:HGNC Symbol;Acc:HGNC:21602]	13.17	9.31
GO:0006954;GO:0071260;GO:0033209;GO:0010803;GO:0042742;GO:0032496;GO:0042981;GO:0090002;GO:0050728;GO:0008625;GO:0042511;GO:0071550;GO:0043123;GO:0042127;GO:0050729;GO:0006955;GO:0008630;GO:0006693;GO:0045944;GO:0016032;GO:1903140;GO:2000304;GO:0005615;GO:0016021;GO:0005739;GO:0009986;GO:0005887;GO:0043235;GO:0045121;GO:0000139;GO:0005031;GO:004312	BP:inflammatory response;BP:cellular response to mechanical stimulus;BP:tumor necrosis factor-mediated signaling pathway;BP:regulation of tumor necrosis factor-mediated signaling pathway;BP:defense response to bacterium;BP:response to lipopolysaccharide;BP:regulation of apoptotic process;BP:establishment of protein localization to plasma membrane;BP:negative regulation of inflammatory response;BP…	ENSG00000067182	TNFRSF1A	TNF receptor superfamily member 1A [Source:HGNC Symbol;Acc:HGNC:11916]	144.88	69.03
GO:0006974;GO:0007165;GO:0050821;GO:0031398;GO:0007265;GO:0071157;GO:0005737;GO:0005634;GO:0000922;GO:0005886;GO:0005815;GO:0005874;GO:0047485;GO:0008270;GO:004280	BP:cellular response to DNA damage stimulus;BP:signal transduction;BP:protein stabilization;BP:positive regulation of protein ubiquitination;BP:Ras protein signal transduction;BP:negative regulation of cell cycle arrest;CC:cytoplasm;CC:nucleus;CC:spindle pole;CC:plasma membrane;CC:microtubule organizing center;CC:microtubule;MF:protein N-terminus binding;MF:zinc ion binding;MF:identical protein b…	ENSG00000068028	RASSF1	Ras association domain family member 1 [Source:HGNC Symbol;Acc:HGNC:9882]	38.56	22.87
GO:0060337;GO:0005634;GO:0005829;GO:000551	BP:type I interferon signaling pathway;CC:nucleus;CC:cytosol;MF:protein binding;	ENSG00000068079	IFI35	interferon induced protein 35 [Source:HGNC Symbol;Acc:HGNC:5399]	284.72	76.81
GO:0031338;GO:0043547;GO:0090630;GO:0006886;GO:1901096;GO:0005776;GO:0012505;GO:0031410;GO:0005096;GO:0017137;GO:000848	BP:regulation of vesicle fusion;BP:positive regulation of GTPase activity;BP:activation of GTPase activity;BP:intracellular protein transport;BP:regulation of autophagosome maturation;CC:autophagosome;CC:endomembrane system;CC:cytoplasmic vesicle;MF:GTPase activator activity;MF:Rab GTPase binding;MF:transaminase activity;	ENSG00000068354	TBC1D25	TBC1 domain family member 25 [Source:HGNC Symbol;Acc:HGNC:8092]	12.04	8.3
GO:0034047;GO:0007165;GO:000015	BP:regulation of protein phosphatase type 2A activity;BP:signal transduction;CC:protein phosphatase type 2A complex;	ENSG00000068971	PPP2R5B	protein phosphatase 2 regulatory subunit B'beta [Source:HGNC Symbol;Acc:HGNC:9310]	15.62	9.85
GO:0019730;GO:0051101;GO:0042742;GO:0002455;GO:0051457;GO:0002268;GO:0009615;GO:0042536;GO:0000060;GO:0043066;GO:0032729;GO:0048536;GO:0045727;GO:0030330;GO:0045082;GO:0045892;GO:0010225;GO:0042771;GO:0002467;GO:0042088;GO:0042345;GO:0045415;GO:0045064;GO:0030198;GO:0045944;GO:0002315;GO:0042832;GO:0045171;GO:0005654;GO:0033257;GO:0048471;GO:0032996;GO:0003677;GO:0008134;GO:0030674;GO:000370	BP:antimicrobial humoral response;BP:regulation of DNA binding;BP:defense response to bacterium;BP:humoral immune response mediated by circulating immunoglobulin;BP:maintenance of protein location in nucleus;BP:follicular dendritic cell differentiation;BP:response to virus;BP:negative regulation of tumor necrosis factor biosynthetic process;BP:protein import into nucleus, translocation;BP:negativ…	ENSG00000069399	BCL3	B-cell CLL/lymphoma 3 [Source:HGNC Symbol;Acc:HGNC:998]	72.455	14.96
GO:0050776;GO:0007166;GO:0005887;GO:0009986;GO:0016021;GO:0005783;GO:0030246;GO:000488	BP:regulation of immune response;BP:cell surface receptor signaling pathway;CC:integral component of plasma membrane;CC:cell surface;CC:integral component of membrane;CC:endoplasmic reticulum;MF:carbohydrate binding;MF:transmembrane signaling receptor activity;	ENSG00000069493	CLEC2D	C-type lectin domain family 2 member D [Source:HGNC Symbol;Acc:HGNC:14351]	13.725	0.455
GO:0030509;GO:0035556;GO:0032354;GO:0034695;GO:0034699;GO:0060317;GO:0006955;GO:0007179;GO:0051271;GO:0060389;GO:0009897;GO:0070062;GO:0016021;GO:0034673;GO:0005615;GO:0043235;GO:0005622;GO:0005576;GO:0050431;GO:0005114;GO:0015026;GO:0070123;GO:004633	BP:BMP signaling pathway;BP:intracellular signal transduction;BP:response to follicle-stimulating hormone;BP:response to prostaglandin E;BP:response to luteinizing hormone;BP:cardiac epithelial to mesenchymal transition;BP:immune response;BP:transforming growth factor beta receptor signaling pathway;BP:negative regulation of cellular component movement;BP:pathway-restricted SMAD protein phosphory…	ENSG00000069702	TGFBR3	transforming growth factor beta receptor 3 [Source:HGNC Symbol;Acc:HGNC:11774]	0.69	3.06
GO:1903435;GO:0007596;GO:0010628;GO:1990182;GO:0048489;GO:0050766;GO:1903428;GO:0043320;GO:1903307;GO:0019882;GO:0071985;GO:0036257;GO:0006605;GO:0032402;GO:0007264;GO:0030318;GO:0043316;GO:0097278;GO:0030425;GO:0030667;GO:0070062;GO:0070382;GO:0030141;GO:0005794;GO:0016324;GO:0033093;GO:0001750;GO:0032585;GO:0042470;GO:0005829;GO:0005622;GO:0005764;GO:0003924;GO:0031489;GO:0003924;GO:0005525;GO:…	BP:positive regulation of constitutive secretory pathway;BP:blood coagulation;BP:positive regulation of gene expression;BP:exosomal secretion;BP:synaptic vesicle transport;BP:positive regulation of phagocytosis;BP:positive regulation of reactive oxygen species biosynthetic process;BP:natural killer cell degranulation;BP:positive regulation of regulated secretory pathway;BP:antigen processing and …	ENSG00000069974	RAB27A	RAB27A, member RAS oncogene family [Source:HGNC Symbol;Acc:HGNC:9766]	29.945	13.2
GO:0045944;GO:0030324;GO:0030325;GO:0032926;GO:0001822;GO:0008584;GO:0007283;GO:0001503;GO:0022409;GO:0045671;GO:0071248;GO:0030514;GO:0002244;GO:0005794;GO:0044306;GO:0030141;GO:0005654;GO:0005615;GO:0001968;GO:004818	BP:positive regulation of transcription from RNA polymerase II promoter;BP:lung development;BP:adrenal gland development;BP:negative regulation of activin receptor signaling pathway;BP:kidney development;BP:male gonad development;BP:spermatogenesis;BP:ossification;BP:positive regulation of cell-cell adhesion;BP:negative regulation of osteoclast differentiation;BP:cellular response to metal ion;BP…	ENSG00000070404	FSTL3	follistatin like 3 [Source:HGNC Symbol;Acc:HGNC:3973]	84.215	28.165
GO:0044238;GO:0018395;GO:0070078;GO:0070079;GO:0001568;GO:0048513;GO:0044763;GO:0048024;GO:0044260;GO:0005730;GO:0044424;GO:0005654;GO:0033746;GO:0070815;GO:0003727;GO:0005488;GO:0005506;GO:0033749;GO:004280	BP:primary metabolic process;BP:peptidyl-lysine hydroxylation to 5-hydroxy-L-lysine;BP:histone H3-R2 demethylation;BP:histone H4-R3 demethylation;BP:blood vessel development;BP:animal organ development;BP:single-organism cellular process;BP:regulation of mRNA splicing, via spliceosome;BP:cellular macromolecule metabolic process;CC:nucleolus;CC:intracellular part;CC:nucleoplasm;MF:histone demethyl…	ENSG00000070495	JMJD6	arginine demethylase and lysine hydroxylase [Source:HGNC Symbol;Acc:HGNC:19355]	27.68	15.525
GO:0006468;GO:0018108;GO:0007283;GO:0030036;GO:0048041;GO:0005737;GO:0005654;GO:0004672;GO:0004674;GO:0004712;GO:0005515;GO:0046872;GO:0005524;GO:000471	BP:protein phosphorylation;BP:peptidyl-tyrosine phosphorylation;BP:spermatogenesis;BP:actin cytoskeleton organization;BP:focal adhesion assembly;CC:cytoplasm;CC:nucleoplasm;MF:protein kinase activity;MF:protein serine/threonine kinase activity;MF:protein serine/threonine/tyrosine kinase activity;MF:protein binding;MF:metal ion binding;MF:ATP binding;MF:protein tyrosine kinase activity;	ENSG00000070759	TESK2	testis-specific kinase 2 [Source:HGNC Symbol;Acc:HGNC:11732]	16.715	1.375
GO:000686	BP:lipid transport;	ENSG00000070882	OSBPL3	oxysterol binding protein like 3 [Source:HGNC Symbol;Acc:HGNC:16370]	3.495	10.305
GO:0009411;GO:0042769;GO:0006301;GO:0006281;GO:0060548;GO:0051984;GO:0006513;GO:0051865;GO:0042405;GO:0005737;GO:0005813;GO:0005654;GO:0005657;GO:0035861;GO:0097505;GO:0003677;GO:0031593;GO:0043142;GO:0032403;GO:0042802;GO:0061630;GO:0000403;GO:0031625;GO:0016874;GO:0003684;GO:000827	BP:response to UV;BP:DNA damage response, detection of DNA damage;BP:postreplication repair;BP:DNA repair;BP:negative regulation of cell death;BP:positive regulation of chromosome segregation;BP:protein monoubiquitination;BP:protein autoubiquitination;CC:nuclear inclusion body;CC:cytoplasm;CC:centrosome;CC:nucleoplasm;CC:replication fork;CC:site of double-strand break;CC:Rad6-Rad18 complex;MF:DNA…	ENSG00000070950	RAD18	RAD18, E3 ubiquitin protein ligase [Source:HGNC Symbol;Acc:HGNC:18278]	0.75	2.645
GO:1903779;GO:0048513;GO:0006874;GO:0071396;GO:0006816;GO:0034220;GO:0070588;GO:0099132;GO:1901701;GO:0071407;GO:0070588;GO:0032590;GO:0045177;GO:0070062;GO:0016021;GO:0005887;GO:0016021;GO:0016021;GO:0016020;GO:0005634;GO:0000166;GO:0043167;GO:0046872;GO:0005524;GO:0030165;GO:0005524;GO:0005388;GO:000538	BP:regulation of cardiac conduction;BP:animal organ development;BP:cellular calcium ion homeostasis;BP:cellular response to lipid;BP:calcium ion transport;BP:ion transmembrane transport;BP:calcium ion transmembrane transport;BP:old GO;BP:cellular response to oxygen-containing compound;BP:cellular response to organic cyclic compound;BP:calcium ion transmembrane transport;CC:dendrite membrane;CC:ap…	ENSG00000070961	ATP2B1	ATPase plasma membrane Ca2+ transporting 1 [Source:HGNC Symbol;Acc:HGNC:814]	1.97	6.335
GO:0044267;GO:0010611;GO:0098779;GO:0000122;GO:0002230;GO:0070886;GO:0098792;GO:0005737;GO:0005615;GO:0005634;GO:0031012;GO:0005654;GO:0003714;GO:000827	BP:cellular protein metabolic process;BP:regulation of cardiac muscle hypertrophy;BP:mitophagy in response to mitochondrial depolarization;BP:negative regulation of transcription from RNA polymerase II promoter;BP:positive regulation of defense response to virus by host;BP:positive regulation of calcineurin-NFAT signaling cascade;BP:xenophagy;CC:cytoplasm;CC:extracellular space;CC:nucleus;CC:extr…	ENSG00000071282	LMCD1	LIM and cysteine rich domains 1 [Source:HGNC Symbol;Acc:HGNC:6633]	2.31	14.035
GO:0006301;GO:0006357;GO:0045944;GO:0000209;GO:0005737;GO:0005730;GO:0016020;GO:0005654;GO:0031625;GO:0016887;GO:0016874;GO:0044822;GO:0004386;GO:0008270;GO:0003676;GO:0001077;GO:0000978;GO:0061630;GO:000552	BP:postreplication repair;BP:regulation of transcription from RNA polymerase II promoter;BP:positive regulation of transcription from RNA polymerase II promoter;BP:protein polyubiquitination;CC:cytoplasm;CC:nucleolus;CC:membrane;CC:nucleoplasm;MF:ubiquitin protein ligase binding;MF:ATPase activity;MF:ligase activity;MF:pol;MF:helicase activity;MF:zinc ion binding;MF:nucleic acid binding;MF:transc…	ENSG00000071794	HLTF	helicase like transcription factor [Source:HGNC Symbol;Acc:HGNC:11099]	1.47	4.935
GO:0048741;GO:0051017;GO:0045214;GO:0051764;GO:0001725;GO:0016328;GO:0030486;GO:0097433;GO:0090636;GO:0090637;GO:0005923;GO:0030027;GO:0005915;GO:0042383;GO:0005925;GO:1990357;GO:0017166;GO:0051015;GO:0051393;GO:0005509;GO:004280	BP:skeletal muscle fiber development;BP:actin filament bundle assembly;BP:sarcomere organization;BP:actin crosslink formation;CC:stress fiber;CC:lateral plasma membrane;CC:smooth muscle dense body;CC:dense body;CC:outer dense plaque of desmosome;CC:inner dense plaque of desmosome;CC:bicellular tight junction;CC:lamellipodium;CC:zonula adherens;CC:sarcolemma;CC:focal adhesion;CC:terminal web;MF:vi…	ENSG00000072110	ACTN1	actinin alpha 1 [Source:HGNC Symbol;Acc:HGNC:163]	443.54	287.585
GO:0000910;GO:0000724;GO:0005813;GO:0030496;GO:0005765;GO:0032266;GO:0005515;GO:004687	BP:cytokinesis;BP:double-strand break repair via homologous recombination;CC:centrosome;CC:midbody;CC:lysosomal membrane;MF:phosphatidylinositol-3-phosphate binding;MF:protein binding;MF:metal ion binding;	ENSG00000072121	ZFYVE26	zinc finger FYVE-type containing 26 [Source:HGNC Symbol;Acc:HGNC:20761]	15.025	9.115
GO:0051056;GO:0007264;GO:0005829;GO:0005622;GO:0005886;GO:000552	BP:regulation of small GTPase mediated signal transduction;BP:small GTPase mediated signal transduction;CC:cytosol;CC:intracellular;CC:plasma membrane;MF:GTP binding;	ENSG00000072422	RHOBTB1	Rho related BTB domain containing 1 [Source:HGNC Symbol;Acc:HGNC:18738]	3.83	11.98
GO:0038095;GO:0006954;GO:0006355;GO:0045944;GO:0006355;GO:1902894;GO:0005730;GO:0005634;GO:0005654;GO:0005829;GO:0001227;GO:0003700;GO:0001077;GO:0005515;GO:0003677;GO:0003700;GO:0003677;GO:000097	BP:Fc-epsilon receptor signaling pathway;BP:inflammatory response;BP:regulation of transcription, DNA-templated;BP:positive regulation of transcription from RNA polymerase II promoter;BP:regulation of transcription, DNA-templated;BP:negative regulation of pri-miRNA transcription from RNA polymerase II promoter;CC:nucleolus;CC:nucleus;CC:nucleoplasm;CC:cytosol;MF:transcriptional repressor activity…	ENSG00000072736	NFATC3	nuclear factor of activated T-cells 3 [Source:HGNC Symbol;Acc:HGNC:7777]	2.555	7.16
GO:0031095;GO:0016021;GO:0005789;GO:0016529;GO:0048471;GO:000551	CC:platelet dense tubular network membrane;CC:integral component of membrane;CC:endoplasmic reticulum membrane;CC:sarcoplasmic reticulum;CC:perinuclear region of cytoplasm;MF:protein binding;	ENSG00000072952	MRVI1	murine retrovirus integration site 1 homolog [Source:HGNC Symbol;Acc:HGNC:7237]	0.05	0.385
GO:0035633;GO:0051384;GO:0008285;GO:0042493;GO:0071260;GO:0090362;GO:0007613;GO:0045429;GO:0045907;GO:0008217;GO:0034644;GO:0010042;GO:0045986;GO:0045987;GO:0030282;GO:0071318;GO:0032355;GO:0045786;GO:0043065;GO:0070542;GO:0071456;GO:0019233;GO:0031394;GO:0019372;GO:0034612;GO:0019371;GO:0042127;GO:0032227;GO:0048661;GO:0007612;GO:0033280;GO:0006769;GO:0071498;GO:0090271;GO:0006954;GO:0090336;GO:…	BP:maintenance of permeability of blood-brain barrier;BP:response to glucocorticoid;BP:negative regulation of cell proliferation;BP:response to drug;BP:cellular response to mechanical stimulus;BP:positive regulation of platelet-derived growth factor production;BP:memory;BP:positive regulation of nitric oxide biosynthetic process;BP:positive regulation of vasoconstriction;BP:regulation of blood pr…	ENSG00000073756	PTGS2	prostaglandin-endoperoxide synthase 2 [Source:HGNC Symbol;Acc:HGNC:9605]	30.88	8.385
GO:0042127;GO:0006468;GO:0035507;GO:2000772;GO:0030155;GO:0006974;GO:1901796;GO:0035556;GO:0005737;GO:0015630;GO:0005730;GO:0005654;GO:0004674;GO:0046872;GO:0002039;GO:000552	BP:regulation of cell proliferation;BP:protein phosphorylation;BP:regulation of myosin-light-chain-phosphatase activity;BP:regulation of cellular senescence;BP:regulation of cell adhesion;BP:cellular response to DNA damage stimulus;BP:regulation of signal transduction by p53 class mediator;BP:intracellular signal transduction;CC:cytoplasm;CC:microtubule cytoskeleton;CC:nucleolus;CC:nucleoplasm;MF…	ENSG00000074590	NUAK1	NUAK family kinase 1 [Source:HGNC Symbol;Acc:HGNC:14311]	4.915	16.535
GO:0006707;GO:0006898;GO:0016358;GO:0016322;GO:0048680;GO:0007165;GO:0007155;GO:0030666;GO:0016021;GO:0005886;GO:0005044;GO:0004888;GO:003016	BP:cholesterol catabolic process;BP:receptor-mediated endocytosis;BP:dendrite development;BP:neuron remodeling;BP:positive regulation of axon regeneration;BP:signal transduction;BP:cell adhesion;CC:endocytic vesicle membrane;CC:integral component of membrane;CC:plasma membrane;MF:scavenger receptor activity;MF:transmembrane signaling receptor activity;MF:low-density lipoprotein particle binding;	ENSG00000074660	SCARF1	scavenger receptor class F member 1 [Source:HGNC Symbol;Acc:HGNC:16820]	40.805	25.035
GO:0033617;GO:0032981;GO:0030150;GO:0005744;GO:0016021;GO:000551	BP:mitochondrial respiratory chain complex IV assembly;BP:mitochondrial respiratory chain complex I assembly;BP:protein import into mitochondrial matrix;CC:mitochondrial inner membrane presequence translocase complex;CC:integral component of membrane;MF:protein binding;	ENSG00000075336	TIMM21	translocase of inner mitochondrial membrane 21 [Source:HGNC Symbol;Acc:HGNC:25010]	3.515	12.79
GO:0032092;GO:0006810;GO:0051017;GO:0051016;GO:0022607;GO:0005737;GO:0044464;GO:0008290;GO:0046982;GO:0030507;GO:0051015;GO:0005515;GO:004280	BP:positive regulation of protein binding;BP:transport;BP:actin filament bundle assembly;BP:barbed-end actin filament capping;BP:cellular component assembly;CC:cytoplasm;CC:cell part;CC:F-actin capping protein complex;MF:protein heterodimerization activity;MF:spectrin binding;MF:actin filament binding;MF:protein binding;MF:protein homodimerization activity;	ENSG00000075340	ADD2	adducin 2 [Source:HGNC Symbol;Acc:HGNC:244]	0.17	0.19
GO:0015986;GO:000521	BP:ATP synthesis coupled proton transport;MF:transporter activity;	ENSG00000075399	VPS9D1	VPS9 domain containing 1 [Source:HGNC Symbol;Acc:HGNC:13526]	22.785	7.135
GO:0048146;GO:0003334;GO:0006357;GO:0045944;GO:0008219;GO:0005654;GO:0043565;GO:0003700;GO:0000982;GO:0005515;GO:0003682;GO:000097	BP:positive regulation of fibroblast proliferation;BP:keratinocyte development;BP:regulation of transcription from RNA polymerase II promoter;BP:positive regulation of transcription from RNA polymerase II promoter;BP:cell death;CC:nucleoplasm;MF:sequence-specific DNA binding;MF:transcription factor activity, sequence-specific DNA binding;MF:transcription factor activity, RNA polymerase II core pr…	ENSG00000075426	FOSL2	FOS like 2, AP-1 transcription factor subunit [Source:HGNC Symbol;Acc:HGNC:3798]	85.225	28.815
GO:0006654;GO:0050764;GO:0016042;GO:0030334;GO:0006935;GO:0007265;GO:0048017;GO:0032534;GO:0005789;GO:0030139;GO:0000139;GO:0048471;GO:0031902;GO:0005794;GO:0016324;GO:0005622;GO:0005765;GO:0005768;GO:0004630;GO:0035091;GO:0070290;GO:000551	BP:phosphatidic acid biosynthetic process;BP:regulation of phagocytosis;BP:lipid catabolic process;BP:regulation of cell migration;BP:chemotaxis;BP:Ras protein signal transduction;BP:inositol lipid-mediated signaling;BP:regulation of microvillus assembly;CC:endoplasmic reticulum membrane;CC:endocytic vesicle;CC:Golgi membrane;CC:perinuclear region of cytoplasm;CC:late endosome membrane;CC:Golgi a…	ENSG00000075651	PLD1	phospholipase D1 [Source:HGNC Symbol;Acc:HGNC:9067]	3.2	22.265
GO:0032508;GO:0006270;GO:0000082;GO:0006260;GO:0006268;GO:0042555;GO:0005654;GO:0005634;GO:0000784;GO:0004003;GO:0042802;GO:0003677;GO:0003678;GO:0003697;GO:000552	BP:DNA duplex unwinding;BP:DNA replication initiation;BP:G1/S transition of mitotic cell cycle;BP:DNA replication;BP:DNA unwinding involved in DNA replication;CC:MCM complex;CC:nucleoplasm;CC:nucleus;CC:nuclear chromosome, telomeric region;MF:ATP-dependent DNA helicase activity;MF:identical protein binding;MF:DNA binding;MF:DNA helicase activity;MF:single-stranded DNA binding;MF:ATP binding;	ENSG00000076003	MCM6	minichromosome maintenance complex component 6 [Source:HGNC Symbol;Acc:HGNC:6949]	5.225	14.3
GO:0006306;GO:0000183;GO:0006338;GO:0016575;GO:0005737;GO:0005730;GO:0005654;GO:0033553;GO:0005677;GO:0001164;GO:0003677;GO:0070577;GO:0008270;GO:0003723;GO:001692	BP:DNA methylation;BP:chromatin silencing at rDNA;BP:chromatin remodeling;BP:histone deacetylation;CC:cytoplasm;CC:nucleolus;CC:nucleoplasm;CC:rDNA heterochromatin;CC:chromatin silencing complex;MF:RNA polymerase I CORE element sequence-specific DNA binding;MF:DNA binding;MF:lysine-acetylated histone binding;MF:zinc ion binding;MF:RNA binding;MF:ligand-dependent nuclear receptor binding;	ENSG00000076108	BAZ2A	bromodomain adjacent to zinc finger domain 2A [Source:HGNC Symbol;Acc:HGNC:962]	34.43	24.055
GO:1904447;GO:0006879;GO:1902600;GO:0098829;GO:0051958;GO:0015886;GO:0046655;GO:0005737;GO:0009986;GO:0016021;GO:0031526;GO:0016324;GO:0008517;GO:0015350;GO:0015078;GO:0005542;GO:001523	BP:folic acid import into cell;BP:cellular iron ion homeostasis;BP:hydrogen ion transmembrane transport;BP:intestinal folate absorption;BP:methotrexate transport;BP:heme transport;BP:folic acid metabolic process;CC:cytoplasm;CC:cell surface;CC:integral component of membrane;CC:brush border membrane;CC:apical plasma membrane;MF:folic acid transporter activity;MF:methotrexate transporter activity;M…	ENSG00000076351	SLC46A1	solute carrier family 46 member 1 [Source:HGNC Symbol;Acc:HGNC:30521]	0.43	1.945
GO:0006633;GO:0051289;GO:0031325;GO:0010906;GO:0010629;GO:0043086;GO:2001295;GO:0010884;GO:0097009;GO:0060421;GO:0006853;GO:0006768;GO:0006084;GO:0031999;GO:0031667;GO:0005634;GO:0012505;GO:0005829;GO:0005741;GO:0003989;GO:0005524;GO:0046872;GO:0005515;GO:000407	BP:fatty acid biosynthetic process;BP:protein homotetramerization;BP:positive regulation of cellular metabolic process;BP:regulation of glucose metabolic process;BP:negative regulation of gene expression;BP:negative regulation of catalytic activity;BP:malonyl-CoA biosynthetic process;BP:positive regulation of lipid storage;BP:energy homeostasis;BP:positive regulation of heart growth;BP:carnitine …	ENSG00000076555	ACACB	acetyl-CoA carboxylase beta [Source:HGNC Symbol;Acc:HGNC:85]	0.29	0.88
GO:0030323;GO:0042981;GO:0007250;GO:0007585;GO:0046330;GO:0090073;GO:0016567;GO:0005923;GO:0005737;GO:0005634;GO:0048471;GO:0005856;GO:0005886;GO:0005622;GO:0005164;GO:0008270;GO:0003677;GO:0050699;GO:0019901;GO:0004842;GO:0031625;GO:003199	BP:respiratory tube development;BP:regulation of apoptotic process;BP:activation of NF-kappaB-inducing kinase activity;BP:respiratory gaseous exchange;BP:positive regulation of JNK cascade;BP:positive regulation of protein homodimerization activity;BP:protein ubiquitination;CC:bicellular tight junction;CC:cytoplasm;CC:nucleus;CC:perinuclear region of cytoplasm;CC:cytoskeleton;CC:plasma membrane;C…	ENSG00000076604	TRAF4	TNF receptor associated factor 4 [Source:HGNC Symbol;Acc:HGNC:12034]	9.32	26
GO:0048598;GO:0048589;GO:0048568;GO:0030154;GO:0060348;GO:0060041;GO:0042981;GO:0043068;GO:0042127;GO:0009887;GO:0060429;GO:0061037;GO:0035295;GO:0007507;GO:0007399;GO:0006357;GO:0006351;GO:0048523;GO:0007165;GO:0005634;GO:0038023;GO:0003677;GO:0043565;GO:0046872;GO:000370	BP:embryonic morphogenesis;BP:developmental growth;BP:embryonic organ development;BP:cell differentiation;BP:bone development;BP:retina development in camera-type eye;BP:regulation of apoptotic process;BP:positive regulation of programmed cell death;BP:regulation of cell proliferation;BP:animal organ morphogenesis;BP:epithelium development;BP:negative regulation of cartilage development;BP:tube d…	ENSG00000077092	RARB	retinoic acid receptor beta [Source:HGNC Symbol;Acc:HGNC:9865]	4.855	23.045
GO:0038061;GO:0032496;GO:0002268;GO:0000122;GO:0048511;GO:0048536;GO:0006355;GO:0034097;GO:0051092;GO:0045087;GO:0032481;GO:0006954;GO:0002467;GO:0007568;GO:0007249;GO:0030198;GO:0045944;GO:0005654;GO:0033257;GO:0005737;GO:0005634;GO:0005829;GO:0001077;GO:0003713;GO:0003700;GO:0003677;GO:0005515;GO:0000978;GO:000368	BP:NIK/NF-kappaB signaling;BP:response to lipopolysaccharide;BP:follicular dendritic cell differentiation;BP:negative regulation of transcription from RNA polymerase II promoter;BP:rhythmic process;BP:spleen development;BP:regulation of transcription, DNA-templated;BP:response to cytokine;BP:positive regulation of NF-kappaB transcription factor activity;BP:innate immune response;BP:positive regul…	ENSG00000077150	NFKB2	nuclear factor kappa B subunit 2 [Source:HGNC Symbol;Acc:HGNC:7795]	115.645	21.085
GO:0021591;GO:0007288;GO:0015630;GO:0097228;GO:0005634;GO:199071	BP:ventricular system development;BP:sperm axoneme assembly;CC:microtubule cytoskeleton;CC:sperm principal piece;CC:nucleus;CC:axonemal central apparatus;	ENSG00000077327	SPAG6	sperm associated antigen 6 [Source:HGNC Symbol;Acc:HGNC:11215]	1.78	0.91
GO:1990619;GO:0006471;GO:0048146;GO:0042593;GO:0061647;GO:0046325;GO:0010569;GO:0003247;GO:2000648;GO:0008285;GO:0006284;GO:0045892;GO:0031648;GO:0031667;GO:0045820;GO:0005737;GO:0005730;GO:0005654;GO:0005724;GO:0008270;GO:0003950;GO:0003956;GO:0003714;GO:0070403;GO:0046969;GO:0005515;GO:000368	BP:histone H3-K9 deacetylation;BP:protein ADP-ribosylation;BP:positive regulation of fibroblast proliferation;BP:glucose homeostasis;BP:histone H3-K9 modification;BP:negative regulation of glucose import;BP:regulation of double-strand break repair via homologous recombination;BP:post-embryonic cardiac muscle cell growth involved in heart morphogenesis;BP:positive regulation of stem cell prolifera…	ENSG00000077463	SIRT6	sirtuin 6 [Source:HGNC Symbol;Acc:HGNC:14934]	22.34	14.32
GO:0007268;GO:0006897;GO:0043547;GO:0005737;GO:0005802;GO:0030672;GO:0015629;GO:0031256;GO:0030054;GO:0005543;GO:0005086;GO:000551	BP:chemical synaptic transmission;BP:endocytosis;BP:positive regulation of GTPase activity;CC:cytoplasm;CC:trans-Golgi network;CC:synaptic vesicle membrane;CC:actin cytoskeleton;CC:leading edge membrane;CC:cell junction;MF:phospholipid binding;MF:ARF guanyl-nucleotide exchange factor activity;MF:protein binding;	ENSG00000078053	AMPH	amphiphysin [Source:HGNC Symbol;Acc:HGNC:471]	2.42	9.3
GO:0048706;GO:0009952;GO:0042118;GO:0006355;GO:0060065;GO:0007283;GO:0008584;GO:0035115;GO:0045638;GO:0009954;GO:0007338;GO:0060216;GO:0030879;GO:0005737;GO:0005634;GO:0005667;GO:0043565;GO:001989	BP:embryonic skeletal system development;BP:anterior/posterior pattern specification;BP:endothelial cell activation;BP:regulation of transcription, DNA-templated;BP:uterus development;BP:spermatogenesis;BP:male gonad development;BP:embryonic forelimb morphogenesis;BP:negative regulation of myeloid cell differentiation;BP:proximal/distal pattern formation;BP:single fertilization;BP:definitive hemo…	ENSG00000078399	HOXA9	homeobox A9 [Source:HGNC Symbol;Acc:HGNC:5109]	14.685	49.945
GO:0045892;GO:0046872;GO:000371	BP:negative regulation of transcription, DNA-templated;MF:metal ion binding;MF:transcription corepressor activity;	ENSG00000079102	RUNX1T1	RUNX1 translocation partner 1 [Source:HGNC Symbol;Acc:HGNC:1535]	1.64	3.74
GO:0006954;GO:0010951;GO:0050965;GO:0005737;GO:0070062;GO:0005515;GO:0008191;GO:000820	BP:inflammatory response;BP:negative regulation of endopeptidase activity;BP:detection of temperature stimulus involved in sensory perception of pain;CC:cytoplasm;CC:extracellular exosome;MF:protein binding;MF:metalloendopeptidase inhibitor activity;MF:heparin binding;	ENSG00000079257	LXN	latexin [Source:HGNC Symbol;Acc:HGNC:13347]	22.975	78.38
GO:0015721;GO:0060312;GO:0050860;GO:0042058;GO:0050900;GO:1903670;GO:0032869;GO:2000346;GO:0030853;GO:0035726;GO:0045601;GO:0046850;GO:1901143;GO:0038016;GO:0038158;GO:0090331;GO:1903385;GO:0014066;GO:0010594;GO:0043318;GO:0007229;GO:0044319;GO:0001558;GO:0070372;GO:0045717;GO:0005911;GO:0070062;GO:0009925;GO:0016324;GO:0016328;GO:0009986;GO:0042101;GO:0005912;GO:0005887;GO:0015125;GO:1990782;GO:…	BP:bile acid and bile salt transport;BP:regulation of blood vessel remodeling;BP:negative regulation of T cell receptor signaling pathway;BP:regulation of epidermal growth factor receptor signaling pathway;BP:leukocyte migration;BP:regulation of sprouting angiogenesis;BP:cellular response to insulin stimulus;BP:negative regulation of hepatocyte proliferation;BP:negative regulation of granulocyte …	ENSG00000079385	CEACAM1	carcinoembryonic antigen related cell adhesion molecule 1 [Source:HGNC Symbol;Acc:HGNC:1814]	5.8	2.205
GO:0017085;GO:0051597;GO:0010288;GO:0006783;GO:0006782;GO:0006779;GO:0010039;GO:0046685;GO:0055114;GO:0016020;GO:0005739;GO:0005743;GO:0005758;GO:0004109;GO:0005212;GO:004280	BP:response to insecticide;BP:response to methylmercury;BP:response to lead ion;BP:heme biosynthetic process;BP:protoporphyrinogen IX biosynthetic process;BP:porphyrin-containing compound biosynthetic process;BP:response to iron ion;BP:response to arsenic-containing substance;BP:oxidation-reduction process;CC:membrane;CC:mitochondrion;CC:mitochondrial inner membrane;CC:mitochondrial intermembrane…	ENSG00000080819	CPOX	coproporphyrinogen oxidase [Source:HGNC Symbol;Acc:HGNC:2321]	3.805	10.82
GO:0006357;GO:0007049;GO:0051726;GO:000566	BP:regulation of transcription from RNA polymerase II promoter;BP:cell cycle;BP:regulation of cell cycle;CC:transcription factor complex;	ENSG00000080839	RBL1	RB transcriptional corepressor like 1 [Source:HGNC Symbol;Acc:HGNC:9893]	0.61	1.81
GO:0010457;GO:0032053;GO:0010669;GO:0033365;GO:0051656;GO:0045494;GO:0070062;GO:0035253;GO:0005814;GO:0001917;GO:0005886;GO:0015629;GO:0019894;GO:0003779;GO:000519	BP:centriole-centriole cohesion;BP:ciliary basal body organization;BP:epithelial structure maintenance;BP:protein localization to organelle;BP:establishment of organelle localization;BP:photoreceptor cell maintenance;CC:extracellular exosome;CC:ciliary rootlet;CC:centriole;CC:photoreceptor inner segment;CC:plasma membrane;CC:actin cytoskeleton;MF:kinesin binding;MF:actin binding;MF:structural mol…	ENSG00000080947	CROCCP3	ciliary rootlet coiled-coil, rootletin pseudogene 3 [Source:HGNC Symbol;Acc:HGNC:29405]	0.13	0.935
GO:0051716;GO:0006935;GO:0009605;GO:0009987;GO:0050794;GO:0002237;GO:0042221;GO:0044763;GO:0044699;GO:000510	BP:cellular response to stimulus;BP:chemotaxis;BP:response to external stimulus;BP:cellular process;BP:regulation of cellular process;BP:response to molecule of bacterial origin;BP:response to chemical;BP:single-organism cellular process;BP:single-organism process;MF:receptor binding;	ENSG00000081041	CXCL2	C-X-C motif chemokine ligand 2 [Source:HGNC Symbol;Acc:HGNC:4603]	241.415	13.85
GO:0042127;GO:0048557;GO:0000122;GO:0016055;GO:0048619;GO:0071353;GO:0030538;GO:0044336;GO:0006955;GO:0021915;GO:0046632;GO:1904837;GO:0033153;GO:0005719;GO:0005667;GO:0005634;GO:0005654;GO:0043565;GO:0001227;GO:0003677;GO:0008013;GO:000104	BP:regulation of cell proliferation;BP:embryonic digestive tract morphogenesis;BP:negative regulation of transcription from RNA polymerase II promoter;BP:Wnt signaling pathway;BP:embryonic hindgut morphogenesis;BP:cellular response to interleukin-4;BP:embryonic genitalia morphogenesis;BP:canonical Wnt signaling pathway involved in negative regulation of apoptotic process;BP:immune response;BP:neu…	ENSG00000081059	TCF7	transcription factor 7 (T-cell specific, HMG-box) [Source:HGNC Symbol;Acc:HGNC:11639]	4.415	1.875
GO:0015721;GO:0060119;GO:0008206;GO:0006855;GO:0007605;GO:0034220;GO:0045892;GO:0045332;GO:0021650;GO:0007030;GO:0015914;GO:0045332;GO:0032534;GO:0005783;GO:0005794;GO:0016021;GO:0016324;GO:0032420;GO:0005887;GO:0016021;GO:0031526;GO:0004012;GO:0000287;GO:0005524;GO:0000287;GO:0005524;GO:0000166;GO:0004012;GO:0005515;GO:190161	BP:bile acid and bile salt transport;BP:inner ear receptor cell development;BP:bile acid metabolic process;BP:drug transmembrane transport;BP:sensory perception of sound;BP:ion transmembrane transport;BP:negative regulation of transcription, DNA-templated;BP:phospholipid translocation;BP:vestibulocochlear nerve formation;BP:Golgi organization;BP:phospholipid transport;BP:phospholipid translocatio…	ENSG00000081923	ATP8B1	ATPase phospholipid transporting 8B1 [Source:HGNC Symbol;Acc:HGNC:3706]	3.245	29.86
GO:1903506;GO:0005737;GO:0035145;GO:0035064;GO:0044822;GO:0003713;GO:000368	BP:regulation of nucleic acid-templated transcription;CC:cytoplasm;CC:exon-exon junction complex;MF:methylated histone binding;MF:pol;MF:transcription coactivator activity;MF:chromatin binding;	ENSG00000083544	TDRD3	tudor domain containing 3 [Source:HGNC Symbol;Acc:HGNC:20612]	0.775	2.33
GO:0007015;GO:0007156;GO:0016337;GO:0009653;GO:0007163;GO:0007267;GO:0016477;GO:0070062;GO:0005634;GO:0005911;GO:0030175;GO:0030027;GO:0005887;GO:0048471;GO:0005925;GO:0005515;GO:000550	BP:actin filament organization;BP:homophilic cell adhesion via plasma membrane adhesion molecules;BP:single organismal cell-cell adhesion;BP:anatomical structure morphogenesis;BP:establishment or maintenance of cell polarity;BP:cell-cell signaling;BP:cell migration;CC:extracellular exosome;CC:nucleus;CC:cell-cell junction;CC:filopodium;CC:lamellipodium;CC:integral component of plasma membrane;CC:…	ENSG00000083857	FAT1	FAT atypical cadherin 1 [Source:HGNC Symbol;Acc:HGNC:3595]	1.125	3.47
GO:0008064;GO:0032268;GO:0050770;GO:0030036;GO:0010591;GO:0035335;GO:0071318;GO:0005737;GO:0030027;GO:0030496;GO:0032154;GO:0005654;GO:0005856;GO:0005886;GO:0008138;GO:0004725;GO:0003779;GO:000367	BP:regulation of actin polymerization or depolymerization;BP:regulation of cellular protein metabolic process;BP:regulation of axonogenesis;BP:actin cytoskeleton organization;BP:regulation of lamellipodium assembly;BP:peptidyl-tyrosine dephosphorylation;BP:cellular response to ATP;CC:cytoplasm;CC:lamellipodium;CC:midbody;CC:cleavage furrow;CC:nucleoplasm;CC:cytoskeleton;CC:plasma membrane;MF:prot…	ENSG00000084112	SSH1	slingshot protein phosphatase 1 [Source:HGNC Symbol;Acc:HGNC:30579]	24.845	14.42
GO:0060718;GO:0000186;GO:0006468;GO:1904355;GO:0032212;GO:1900745;GO:0019100;GO:0043507;GO:0010225;GO:0010468;GO:0001890;GO:0051973;GO:0048471;GO:0005515;GO:0004672;GO:0005524;GO:0046872;GO:000470	BP:chorionic trophoblast cell differentiation;BP:activation of MAPKK activity;BP:protein phosphorylation;BP:positive regulation of telomere capping;BP:positive regulation of telomere maintenance via telomerase;BP:positive regulation of p38MAPK cascade;BP:male germ-line sex determination;BP:positive regulation of JUN kinase activity;BP:response to UV-C;BP:regulation of gene expression;BP:placenta …	ENSG00000085511	MAP3K4	mitogen-activated protein kinase kinase kinase 4 [Source:HGNC Symbol;Acc:HGNC:6856]	1.48	5.71
GO:0070124;GO:0006446;GO:0032790;GO:0006413;GO:0005739;GO:0005654;GO:0044822;GO:0003924;GO:0005525;GO:0043024;GO:000374	BP:mitochondrial translational initiation;BP:regulation of translational initiation;BP:ribosome disassembly;BP:translational initiation;CC:mitochondrion;CC:nucleoplasm;MF:pol;MF:GTPase activity;MF:GTP binding;MF:ribosomal small subunit binding;MF:translation initiation factor activity;	ENSG00000085760	MTIF2	mitochondrial translational initiation factor 2 [Source:HGNC Symbol;Acc:HGNC:7441]	2.545	8.22
GO:0008285;GO:0018146;GO:0048754;GO:0050900;GO:0005989;GO:0006487;GO:0045136;GO:0006012;GO:0002064;GO:0060058;GO:0060055;GO:0060054;GO:0007339;GO:0007341;GO:0007155;GO:0002526;GO:0051270;GO:0005975;GO:0060046;GO:0030198;GO:0005975;GO:0009897;GO:0030175;GO:0030112;GO:0030057;GO:0005615;GO:0016021;GO:0005794;GO:0032580;GO:0016323;GO:0070062;GO:0000138;GO:0031526;GO:0005794;GO:0016021;GO:0016020;GO:…	BP:negative regulation of cell proliferation;BP:keratan sulfate biosynthetic process;BP:branching morphogenesis of an epithelial tube;BP:leukocyte migration;BP:lactose biosynthetic process;BP:protein N-linked glycosylation;BP:development of secondary sexual characteristics;BP:galactose metabolic process;BP:epithelial cell development;BP:positive regulation of apoptotic process involved in mammary…	ENSG00000086062	B4GALT1	beta-1,4-galactosyltransferase 1 [Source:HGNC Symbol;Acc:HGNC:924]	128.305	46.695
GO:0016310;GO:0043647;GO:0098779;GO:0016310;GO:0002230;GO:0098792;GO:0005654;GO:0005829;GO:0008440;GO:0008440;GO:0016301;GO:0016740;GO:0005516;GO:000552	BP:phosphorylation;BP:inositol phosphate metabolic process;BP:mitophagy in response to mitochondrial depolarization;BP:phosphorylation;BP:positive regulation of defense response to virus by host;BP:xenophagy;CC:nucleoplasm;CC:cytosol;MF:inositol-1,4,5-trisphosphate 3-kinase activity;MF:inositol-1,4,5-trisphosphate 3-kinase activity;MF:kinase activity;MF:transferase activity;MF:calmodulin binding;…	ENSG00000086544	ITPKC	inositol-trisphosphate 3-kinase C [Source:HGNC Symbol;Acc:HGNC:14897]	19.44	10.185
GO:0071480;GO:0014911;GO:0000302;GO:0043406;GO:0001666;GO:0051897;GO:0042554;GO:0050667;GO:0000902;GO:0051496;GO:0043065;GO:0010467;GO:0034599;GO:0055114;GO:0055114;GO:0055114;GO:0006954;GO:0008285;GO:0007569;GO:0072593;GO:0000902;GO:0042554;GO:0050667;GO:0006801;GO:0010467;GO:0071333;GO:2000573;GO:0008285;GO:2000379;GO:0055007;GO:0006954;GO:0045453;GO:0055114;GO:0007569;GO:0071320;GO:0071560;GO:…	BP:cellular response to gamma radiation;BP:positive regulation of smooth muscle cell migration;BP:response to reactive oxygen species;BP:positive regulation of MAP kinase activity;BP:response to hypoxia;BP:positive regulation of protein kinase B signaling;BP:superoxide anion generation;BP:homocysteine metabolic process;BP:cell morphogenesis;BP:positive regulation of stress fiber assembly;BP:posit…	ENSG00000086991	NOX4	NADPH oxidase 4 [Source:HGNC Symbol;Acc:HGNC:7891]	3.4	12.4
GO:0007165;GO:0036491;GO:1903573;GO:0008219;GO:0014070;GO:0071310;GO:0035307;GO:0045936;GO:0070262;GO:0006915;GO:0035308;GO:0007154;GO:0036496;GO:0043666;GO:0031400;GO:0080135;GO:0005783;GO:0016020;GO:0005739;GO:0012505;GO:0043231;GO:0044444;GO:0019899;GO:001990	BP:signal transduction;BP:regulation of translation initiation in response to endoplasmic reticulum stress;BP:negative regulation of response to endoplasmic reticulum stress;BP:cell death;BP:response to organic cyclic compound;BP:cellular response to organic substance;BP:positive regulation of protein dephosphorylation;BP:negative regulation of phosphate metabolic process;BP:peptidyl-serine depho…	ENSG00000087074	PPP1R15A	protein phosphatase 1 regulatory subunit 15A [Source:HGNC Symbol;Acc:HGNC:14375]	72.575	41.285
GO:0016021;GO:001602	CC:integral component of membrane;CC:membrane;	ENSG00000087085	ACHE	acetylcholinesterase (Cartwright blood group) [Source:HGNC Symbol;Acc:HGNC:108]	0.915	0.21
GO:0030819;GO:0007565;GO:0008285;GO:0008284;GO:0032330;GO:0007189;GO:0007267;GO:0032331;GO:0032330;GO:0008544;GO:0010468;GO:0002076;GO:0005794;GO:0005615;GO:0005654;GO:0005576;GO:0005576;GO:0005179;GO:0051428;GO:000517	BP:positive regulation of cAMP biosynthetic process;BP:female pregnancy;BP:negative regulation of cell proliferation;BP:positive regulation of cell proliferation;BP:regulation of chondrocyte differentiation;BP:adenylate cyclase-activating G-protein coupled receptor signaling pathway;BP:cell-cell signaling;BP:negative regulation of chondrocyte differentiation;BP:regulation of chondrocyte different…	ENSG00000087494	PTHLH	parathyroid hormone like hormone [Source:HGNC Symbol;Acc:HGNC:9607]	1.075	0.25
GO:0035335;GO:0005737;GO:0005856;GO:0009898;GO:0008092;GO:000472	BP:peptidyl-tyrosine dephosphorylation;CC:cytoplasm;CC:cytoskeleton;CC:cytoplasmic side of plasma membrane;MF:cytoskeletal protein binding;MF:non-membrane spanning protein tyrosine phosphatase activity;	ENSG00000088179	PTPN4	protein tyrosine phosphatase, non-receptor type 4 [Source:HGNC Symbol;Acc:HGNC:9656]	0.88	2.32
GO:0001501;GO:0001508;GO:0060158;GO:0007213;GO:0007603;GO:0007165;GO:0007186;GO:0009649;GO:0030168;GO:0007507;GO:0071467;GO:0045634;GO:0070062;GO:0005886;GO:0001750;GO:0005765;GO:0004871;GO:0001664;GO:0046872;GO:0031826;GO:0005525;GO:0031683;GO:0003924;GO:0031683;GO:0019001;GO:0003924;GO:000487	BP:skeletal system development;BP:action potential;BP:phospholipase C-activating dopamine receptor signaling pathway;BP:G-protein coupled acetylcholine receptor signaling pathway;BP:phototransduction, visible light;BP:signal transduction;BP:G-protein coupled receptor signaling pathway;BP:entrainment of circadian clock;BP:platelet activation;BP:heart development;BP:cellular response to pH;BP:regul…	ENSG00000088256	GNA11	G protein subunit alpha 11 [Source:HGNC Symbol;Acc:HGNC:4379]	61.63	38.675
GO:0051056;GO:0005654;GO:0005829;GO:0030054;GO:000509	BP:regulation of small GTPase mediated signal transduction;CC:nucleoplasm;CC:cytosol;CC:cell junction;MF:GTPase activator activity;	ENSG00000088756	ARHGAP28	Rho GTPase activating protein 28 [Source:HGNC Symbol;Acc:HGNC:25509]	0.905	4.92
GO:0000187;GO:0006811;GO:0098655;GO:0060079;GO:0033198;GO:0035590;GO:0006954;GO:0010524;GO:0070230;GO:0007596;GO:0006900;GO:0010628;GO:0014054;GO:0032963;GO:0010043;GO:0030501;GO:0032496;GO:0034767;GO:0007005;GO:0019835;GO:0050830;GO:0000902;GO:0071359;GO:0051495;GO:0042098;GO:0009612;GO:0051209;GO:0043029;GO:0017121;GO:0045919;GO:0043409;GO:1904172;GO:0019233;GO:0051901;GO:0048705;GO:0051259;GO:…	BP:activation of MAPK activity;BP:ion transport;BP:cation transmembrane transport;BP:excitatory postsynaptic potential;BP:response to ATP;BP:purinergic nucleotide receptor signaling pathway;BP:inflammatory response;BP:positive regulation of calcium ion transport into cytosol;BP:positive regulation of lymphocyte apoptotic process;BP:blood coagulation;BP:membrane budding;BP:positive regulation of g…	ENSG00000089041	P2RX7	purinergic receptor P2X 7 [Source:HGNC Symbol;Acc:HGNC:8537]	12.845	3.4
GO:0016021;GO:000551	CC:integral component of membrane;MF:protein binding;	ENSG00000089351	GRAMD1A	GRAM domain containing 1A [Source:HGNC Symbol;Acc:HGNC:29305]	97.215	60.63
GO:0071108;GO:0035871;GO:0006508;GO:0016579;GO:0016579;GO:0070536;GO:0071108;GO:0035871;GO:0070536;GO:0005634;GO:0005634;GO:0019784;GO:0043130;GO:0008234;GO:0008233;GO:0005515;GO:0016787;GO:0016787;GO:0036459;GO:0004843;GO:0004843;GO:0043130;GO:0019784;GO:000484	BP:protein K48-linked deubiquitination;BP:protein K11-linked deubiquitination;BP:proteolysis;BP:protein deubiquitination;BP:protein deubiquitination;BP:protein K63-linked deubiquitination;BP:protein K48-linked deubiquitination;BP:protein K11-linked deubiquitination;BP:protein K63-linked deubiquitination;CC:nucleus;CC:nucleus;MF:NEDD8-specific protease activity;MF:ubiquitin binding;MF:cysteine-typ…	ENSG00000089723	OTUB2	OTU deubiquitinase, ubiquitin aldehyde binding 2 [Source:HGNC Symbol;Acc:HGNC:20351]	0.305	0.97
GO:0010467;GO:0005737;GO:0046872;GO:0003676;GO:000367	BP:gene expression;CC:cytoplasm;MF:metal ion binding;MF:nucleic acid binding;MF:DNA binding;	ENSG00000089775	ZBTB25	zinc finger and BTB domain containing 25 [Source:HGNC Symbol;Acc:HGNC:13112]	0.425	1.695
GO:0046718;GO:0008360;GO:0045907;GO:0016337;GO:0031669;GO:0042493;GO:0030155;GO:0097368;GO:0070234;GO:1902042;GO:0045429;GO:0002457;GO:0071222;GO:0061028;GO:0014070;GO:0002438;GO:0010212;GO:0043547;GO:0010477;GO:0030838;GO:1900027;GO:0046813;GO:0071312;GO:0001910;GO:0046688;GO:0071456;GO:0034698;GO:0033627;GO:0043200;GO:0007605;GO:0071333;GO:2000352;GO:0045471;GO:0051092;GO:0007157;GO:0046006;GO:…	BP:viral entry into host cell;BP:regulation of cell shape;BP:positive regulation of vasoconstriction;BP:single organismal cell-cell adhesion;BP:cellular response to nutrient levels;BP:response to drug;BP:regulation of cell adhesion;BP:establishment of Sertoli cell barrier;BP:positive regulation of T cell apoptotic process;BP:negative regulation of extrinsic apoptotic signaling pathway via death d…	ENSG00000090339	ICAM1	intercellular adhesion molecule 1 [Source:HGNC Symbol;Acc:HGNC:5344]	1905.73	45.62
GO:004698	MF:protein dimerization activity;	ENSG00000090447	TFAP4	transcription factor AP-4 [Source:HGNC Symbol;Acc:HGNC:11745]	0.31	2.935
GO:0001702;GO:0030336;GO:0045785;GO:0021919;GO:0033504;GO:0045668;GO:0002053;GO:0001501;GO:0030900;GO:0030514;GO:0001707;GO:0005615;GO:0019955;GO:0045545;GO:000820	BP:gastrulation with mouth forming second;BP:negative regulation of cell migration;BP:positive regulation of cell adhesion;BP:BMP signaling pathway involved in spinal cord dorsal/ventral patterning;BP:floor plate development;BP:negative regulation of osteoblast differentiation;BP:positive regulation of mesenchymal cell proliferation;BP:skeletal system development;BP:forebrain development;BP:negat…	ENSG00000090539	CHRD	chordin [Source:HGNC Symbol;Acc:HGNC:1949]	0.61	0.43
GO:0030885;GO:0048873;GO:0090290;GO:0032825;GO:0045663;GO:0045787;GO:0035162;GO:0045944;GO:1901741;GO:0071866;GO:0016310;GO:0071864;GO:0001934;GO:0007165;GO:0005615;GO:0016021;GO:0031233;GO:0005125;GO:0016301;GO:0030971;GO:004280	BP:regulation of myeloid dendritic cell activation;BP:homeostasis of number of cells within a tissue;BP:positive regulation of osteoclast proliferation;BP:positive regulation of natural killer cell differentiation;BP:positive regulation of myoblast differentiation;BP:positive regulation of cell cycle;BP:embryonic hemopoiesis;BP:positive regulation of transcription from RNA polymerase II promoter;…	ENSG00000090554	FLT3LG	fms related tyrosine kinase 3 ligand [Source:HGNC Symbol;Acc:HGNC:3766]	11.425	5.055
GO:0043547;GO:0043065;GO:0035023;GO:0005829;GO:0005089;GO:000551	BP:positive regulation of GTPase activity;BP:positive regulation of apoptotic process;BP:regulation of Rho protein signal transduction;CC:cytosol;MF:Rho guanyl-nucleotide exchange factor activity;MF:protein binding;	ENSG00000090924	PLEKHG2	pleckstrin homology and RhoGEF domain containing G2 [Source:HGNC Symbol;Acc:HGNC:29515]	28.14	11.165
GO:2001237;GO:0048565;GO:0007160;GO:0050900;GO:0010668;GO:0043547;GO:0035878;GO:0043065;GO:0022409;GO:0043588;GO:0033627;GO:0097186;GO:0031581;GO:0050873;GO:0031668;GO:0072001;GO:0042327;GO:0007229;GO:0030198;GO:0045944;GO:0046847;GO:0009897;GO:0005925;GO:0030056;GO:0009925;GO:0008305;GO:0005604;GO:0046872;GO:0005178;GO:0038132;GO:003199	BP:negative regulation of extrinsic apoptotic signaling pathway;BP:digestive tract development;BP:cell-matrix adhesion;BP:leukocyte migration;BP:ectodermal cell differentiation;BP:positive regulation of GTPase activity;BP:nail development;BP:positive regulation of apoptotic process;BP:positive regulation of cell-cell adhesion;BP:skin development;BP:cell adhesion mediated by integrin;BP:amelogenes…	ENSG00000091409	ITGA6	integrin subunit alpha 6 [Source:HGNC Symbol;Acc:HGNC:6142]	7.965	21.815
GO:0009314;GO:0050900;GO:0045766;GO:0060135;GO:0001666;GO:0050928;GO:0014070;GO:0072012;GO:0009612;GO:0007275;GO:0030154;GO:0050900;GO:0007165;GO:0001525;GO:0043537;GO:0048014;GO:0050928;GO:0072012;GO:0010812;GO:0031100;GO:0014823;GO:0007281;GO:0048014;GO:0043537;GO:0071363;GO:0009749;GO:0016525;GO:0005615;GO:0005634;GO:0005576;GO:0005615;GO:0005576;GO:0005615;GO:0005886;GO:0042995;GO:0030971;GO:…	BP:response to radiation;BP:leukocyte migration;BP:positive regulation of angiogenesis;BP:maternal process involved in female pregnancy;BP:response to hypoxia;BP:negative regulation of positive chemotaxis;BP:response to organic cyclic compound;BP:glomerulus vasculature development;BP:response to mechanical stimulus;BP:multicellular organism development;BP:cell differentiation;BP:leukocyte migrati…	ENSG00000091879	ANGPT2	angiopoietin 2 [Source:HGNC Symbol;Acc:HGNC:485]	13.59	46.965
GO:0008037;GO:0050776;GO:0050776;GO:0043031;GO:0007156;GO:0007157;GO:0043031;GO:0016021;GO:0005913;GO:0005887;GO:0005886;GO:0050839;GO:0004872;GO:0005102;GO:004280	BP:cell recognition;BP:regulation of immune response;BP:regulation of immune response;BP:negative regulation of macrophage activation;BP:homophilic cell adhesion via plasma membrane adhesion molecules;BP:heterophilic cell-cell adhesion via plasma membrane cell adhesion molecules;BP:negative regulation of macrophage activation;CC:integral component of membrane;CC:cell-cell adherens junction;CC:int…	ENSG00000091972	CD200	CD200 molecule [Source:HGNC Symbol;Acc:HGNC:7203]	2.21	7.365
GO:0044710;GO:0002429;GO:0019884;GO:0043161;GO:1903050;GO:0060828;GO:1903047;GO:0048523;GO:1901990;GO:1904666;GO:0045862;GO:0035556;GO:0043085;GO:0005737;GO:0070062;GO:000050	BP:single-organism metabolic process;BP:immune response-activating cell surface receptor signaling pathway;BP:antigen processing and presentation of exogenous antigen;BP:proteasome-mediated ubiquitin-dependent protein catabolic process;BP:regulation of proteolysis involved in cellular protein catabolic process;BP:regulation of canonical Wnt signaling pathway;BP:mitotic cell cycle process;BP:negat…	ENSG00000092010	PSME1	proteasome activator subunit 1 [Source:HGNC Symbol;Acc:HGNC:9568]	304.86	186.53
GO:0009887;GO:0006915;GO:0007010;GO:0071526;GO:0048843;GO:0050919;GO:0001755;GO:2001224;GO:0016021;GO:0030424;GO:0005887;GO:0030215;GO:004549	BP:animal organ morphogenesis;BP:apoptotic process;BP:cytoskeleton organization;BP:semaphorin-plexin signaling pathway;BP:negative regulation of axon extension involved in axon guidance;BP:negative chemotaxis;BP:neural crest cell migration;BP:positive regulation of neuron migration;CC:integral component of membrane;CC:axon;CC:integral component of plasma membrane;MF:semaphorin receptor binding;MF…	ENSG00000092421	SEMA6A	semaphorin 6A [Source:HGNC Symbol;Acc:HGNC:10738]	0.72	0.305
GO:000697	BP:cellular response to DNA damage stimulus;	ENSG00000092470	WDR76	WD repeat domain 76 [Source:HGNC Symbol;Acc:HGNC:25773]	2.185	4.67
GO:0033314;GO:0018105;GO:0031572;GO:0006921;GO:0006281;GO:0032147;GO:0006260;GO:0005737;GO:0005654;GO:0003677;GO:001099	BP:mitotic DNA replication checkpoint;BP:peptidyl-serine phosphorylation;BP:G2 DNA damage checkpoint;BP:cellular component disassembly involved in execution phase of apoptosis;BP:DNA repair;BP:activation of protein kinase activity;BP:DNA replication;CC:cytoplasm;CC:nucleoplasm;MF:DNA binding;MF:anaphase-promoting complex binding;	ENSG00000092853	CLSPN	claspin [Source:HGNC Symbol;Acc:HGNC:19715]	1.665	5.49
GO:1904385;GO:0000076;GO:0008285;GO:1904117;GO:0006270;GO:0000083;GO:0030071;GO:0008156;GO:0045737;GO:0051301;GO:0048146;GO:0051984;GO:0007089;GO:0032467;GO:0005794;GO:0005829;GO:0005654;GO:0000922;GO:0051233;GO:0019900;GO:000552	BP:cellular response to angiotensin;BP:DNA replication checkpoint;BP:negative regulation of cell proliferation;BP:cellular response to vasopressin;BP:DNA replication initiation;BP:regulation of transcription involved in G1/S transition of mitotic cell cycle;BP:regulation of mitotic metaphase/anaphase transition;BP:negative regulation of DNA replication;BP:positive regulation of cyclin-dependent p…	ENSG00000094804	CDC6	cell division cycle 6 [Source:HGNC Symbol;Acc:HGNC:1744]	1.845	8.385
GO:0031032;GO:0045785;GO:0051549;GO:0042060;GO:0010837;GO:0010628;GO:0010628;GO:0045785;GO:0042060;GO:0051549;GO:0031032;GO:0005856;GO:0005737;GO:0045177;GO:0019898;GO:0019898;GO:0005856;GO:0005886;GO:0005829;GO:0005737;GO:0005737;GO:0005737;GO:0030054;GO:0005923;GO:0005856;GO:0005856;GO:0045177;GO:0005923;GO:0005200;GO:0008092;GO:0008092;GO:000520	BP:actomyosin structure organization;BP:positive regulation of cell adhesion;BP:positive regulation of keratinocyte migration;BP:wound healing;BP:regulation of keratinocyte proliferation;BP:positive regulation of gene expression;BP:positive regulation of gene expression;BP:positive regulation of cell adhesion;BP:wound healing;BP:positive regulation of keratinocyte migration;BP:actomyosin structur…	ENSG00000095203	EPB41L4B	erythrocyte membrane protein band 4.1 like 4B [Source:HGNC Symbol;Acc:HGNC:19818]	0.015	0.175
GO:0007254;GO:0043547;GO:0009967;GO:0007264;GO:0005737;GO:0016020;GO:0005622;GO:0005070;GO:000508	BP:JNK cascade;BP:positive regulation of GTPase activity;BP:positive regulation of signal transduction;BP:small GTPase mediated signal transduction;CC:cytoplasm;CC:membrane;CC:intracellular;MF:SH3/SH2 adaptor activity;MF:guanyl-nucleotide exchange factor activity;	ENSG00000095370	SH2D3C	SH2 domain containing 3C [Source:HGNC Symbol;Acc:HGNC:16884]	4.49	38.225
GO:0016051;GO:0009103;GO:0070062;GO:0005829;GO:0047444;GO:0008781;GO:0003824;GO:005046	BP:carbohydrate biosynthetic process;BP:lipopolysaccharide biosynthetic process;CC:extracellular exosome;CC:cytosol;MF:N-acylneuraminate-9-phosphate synthase activity;MF:N-acylneuraminate cytidylyltransferase activity;MF:catalytic activity;MF:N-acetylneuraminate synthase activity;	ENSG00000095380	NANS	N-acetylneuraminate synthase [Source:HGNC Symbol;Acc:HGNC:19237]	130.905	78.695
GO:0008284;GO:0032092;GO:0016477;GO:0010718;GO:0090263;GO:0008360;GO:0045893;GO:0035413;GO:0030512;GO:0007179;GO:0030512;GO:0008284;GO:0090263;GO:0045893;GO:0032092;GO:0030512;GO:0030512;GO:0030512;GO:0016477;GO:0010718;GO:0090263;GO:0035413;GO:0008360;GO:0005737;GO:0016021;GO:0005886;GO:0016021;GO:0016020;GO:0005737;GO:0005886;GO:0005737;GO:0005886;GO:0005109;GO:0005114;GO:0005109;GO:000511	BP:positive regulation of cell proliferation;BP:positive regulation of protein binding;BP:cell migration;BP:positive regulation of epithelial to mesenchymal transition;BP:positive regulation of canonical Wnt signaling pathway;BP:regulation of cell shape;BP:positive regulation of transcription, DNA-templated;BP:positive regulation of catenin import into nucleus;BP:negative regulation of transformi…	ENSG00000095739	BAMBI	BMP and activin membrane bound inhibitor [Source:HGNC Symbol;Acc:HGNC:30251]	0.755	2.225
GO:0032922;GO:0030154;GO:0042752;GO:0006631;GO:0048384;GO:0007283;GO:0051591;GO:0045892;GO:0006687;GO:0045944;GO:0006006;GO:0007275;GO:0005737;GO:0005634;GO:0005667;GO:0003700;GO:0008140;GO:000104	BP:circadian regulation of gene expression;BP:cell differentiation;BP:regulation of circadian rhythm;BP:fatty acid metabolic process;BP:retinoic acid receptor signaling pathway;BP:spermatogenesis;BP:response to cAMP;BP:negative regulation of transcription, DNA-templated;BP:glycosphingolipid metabolic process;BP:positive regulation of transcription from RNA polymerase II promoter;BP:glucose metabo…	ENSG00000095794	CREM	cAMP responsive element modulator [Source:HGNC Symbol;Acc:HGNC:2352]	61.93	34.465
GO:0090630;GO:0051056;GO:0005829;GO:000509	BP:activation of GTPase activity;BP:regulation of small GTPase mediated signal transduction;CC:cytosol;MF:GTPase activator activity;	ENSG00000097096	SYDE2	synapse defective Rho GTPase homolog 2 [Source:HGNC Symbol;Acc:HGNC:25841]	0.06	0.39
GO:0008360;GO:0008360;GO:0005737;GO:0016020;GO:0016020;GO:0005737;GO:0030425;GO:0042995;GO:0043197;GO:004319	BP:regulation of cell shape;BP:regulation of cell shape;CC:cytoplasm;CC:membrane;CC:membrane;CC:cytoplasm;CC:dendrite;CC:cell projection;CC:dendritic spine;CC:dendritic spine;	ENSG00000099260	PALMD	palmdelphin [Source:HGNC Symbol;Acc:HGNC:15846]	18.54	92.475
GO:0003677;GO:000827	MF:DNA binding;MF:zinc ion binding;	ENSG00000099364	FBXL19	F-box and leucine rich repeat protein 19 [Source:HGNC Symbol;Acc:HGNC:25300]	28.155	18.3
GO:0006367;GO:0006357;GO:0005737;GO:0016020;GO:0016592;GO:0001104;GO:000551	BP:transcription initiation from RNA polymerase II promoter;BP:regulation of transcription from RNA polymerase II promoter;CC:cytoplasm;CC:membrane;CC:mediator complex;MF:RNA polymerase II transcription cofactor activity;MF:protein binding;	ENSG00000099917	MED15	mediator complex subunit 15 [Source:HGNC Symbol;Acc:HGNC:14248]	82.335	45.04
GO:0031338;GO:0097202;GO:0090630;GO:0042147;GO:1902017;GO:0006886;GO:0070062;GO:0005829;GO:0005902;GO:0012505;GO:0005886;GO:0005085;GO:0017137;GO:0005096;GO:003016	BP:regulation of vesicle fusion;BP:activation of cysteine-type endopeptidase activity;BP:activation of GTPase activity;BP:retrograde transport, endosome to Golgi;BP:regulation of cilium assembly;BP:intracellular protein transport;CC:extracellular exosome;CC:cytosol;CC:microvillus;CC:endomembrane system;CC:plasma membrane;MF:guanyl-nucleotide exchange factor activity;MF:Rab GTPase binding;MF:GTPas…	ENSG00000099992	TBC1D10A	TBC1 domain family member 10A [Source:HGNC Symbol;Acc:HGNC:23609]	13.175	8.645
GO:0019483;GO:0006807;GO:0046135;GO:0070062;GO:0005829;GO:0003837;GO:0046872;GO:001681	BP:beta-alanine biosynthetic process;BP:nitrogen compound metabolic process;BP:pyrimidine nucleoside catabolic process;CC:extracellular exosome;CC:cytosol;MF:beta-ureidopropionase activity;MF:metal ion binding;MF:hydrolase activity, acting on carbon-nitroge;	ENSG00000100024	UPB1	beta-ureidopropionase 1 [Source:HGNC Symbol;Acc:HGNC:16297]	0	0.435
GO:0007250;GO:0006461;GO:0042981;GO:0032449;GO:0030159;GO:000551	BP:activation of NF-kappaB-inducing kinase activity;BP:protein complex assembly;BP:regulation of apoptotic process;CC:CBM complex;MF:receptor signaling complex scaffold activity;MF:protein binding;	ENSG00000100065	CARD10	caspase recruitment domain family member 10 [Source:HGNC Symbol;Acc:HGNC:16422]	4.395	17.88
GO:0061304;GO:0045840;GO:0042074;GO:0060349;GO:0033690;GO:0008217;GO:0006897;GO:0060042;GO:0060612;GO:0071901;GO:0042981;GO:0001702;GO:0061178;GO:0046850;GO:0060444;GO:0048539;GO:0045668;GO:1904886;GO:1902262;GO:0035426;GO:0060070;GO:0060033;GO:0035019;GO:0042632;GO:0044332;GO:0042733;GO:0060764;GO:0008203;GO:0051091;GO:0009952;GO:0045600;GO:0002053;GO:0045944;GO:0006007;GO:0060828;GO:0002076;GO:…	BP:retinal blood vessel morphogenesis;BP:positive regulation of mitotic nuclear division;BP:cell migration involved in gastrulation;BP:bone morphogenesis;BP:positive regulation of osteoblast proliferation;BP:regulation of blood pressure;BP:endocytosis;BP:retina morphogenesis in camera-type eye;BP:adipose tissue development;BP:negative regulation of protein serine/threonine kinase activity;BP:regu…	ENSG00000100068	LRP5L	LDL receptor related protein 5 like [Source:HGNC Symbol;Acc:HGNC:25323]	0.21	0.88
GO:0043553;GO:0014067;GO:0070062;GO:0016021;GO:0005886;GO:003631	BP:negative regulation of phosphatidylinositol 3-kinase activity;BP:negative regulation of phosphatidylinositol 3-kinase signaling;CC:extracellular exosome;CC:integral component of membrane;CC:plasma membrane;MF:phosphatidylinositol 3-kinase catalytic subunit binding;	ENSG00000100100	PIK3IP1	phosphoinositide-3-kinase interacting protein 1 [Source:HGNC Symbol;Acc:HGNC:24942]	3.01	11.13
GO:1900026;GO:0051016;GO:0030047;GO:0007067;GO:0051301;GO:0005737;GO:0015629;GO:0005634;GO:0030496;GO:0005815;GO:0005925;GO:0031625;GO:0051015;GO:0017049;GO:004515	BP:positive regulation of substrate adhesion-dependent cell spreading;BP:barbed-end actin filament capping;BP:actin modification;BP:mitotic nuclear division;BP:cell division;CC:cytoplasm;CC:actin cytoskeleton;CC:nucleus;CC:midbody;CC:microtubule organizing center;CC:focal adhesion;MF:ubiquitin protein ligase binding;MF:actin filament binding;MF:GTP-Rho binding;MF:myosin II binding;	ENSG00000100101	Z83844.1	-	1.345	0.355
GO:0006612;GO:0006898;GO:1990126;GO:0032456;GO:0036010;GO:0097320;GO:0031175;GO:0032458;GO:0055038;GO:0005770;GO:0019898;GO:0005769;GO:0005802;GO:0046872;GO:0008270;GO:0017137;GO:0070300;GO:0017137;GO:0046872;GO:004280	BP:protein targeting to membrane;BP:receptor-mediated endocytosis;BP:retrograde transport, endosome to plasma membrane;BP:endocytic recycling;BP:protein localization to endosome;BP:membrane tubulation;BP:neuron projection development;BP:slow endocytic recycling;CC:recycling endosome membrane;CC:late endosome;CC:extrinsic component of membrane;CC:early endosome;CC:trans-Golgi network;MF:metal ion …	ENSG00000100139	MICALL1	MICAL like 1 [Source:HGNC Symbol;Acc:HGNC:29804]	35.96	23.575
GO:0006633;GO:2000347;GO:0031062;GO:1900102;GO:0036500;GO:0035356;GO:0045582;GO:0051024;GO:0060612;GO:1900413;GO:0071222;GO:0042632;GO:0001525;GO:0071230;GO:0016049;GO:0000122;GO:0031670;GO:0045348;GO:0071353;GO:0010508;GO:0045600;GO:0071332;GO:0071333;GO:0048666;GO:1990440;GO:0071499;GO:1903071;GO:2000353;GO:0036498;GO:2000778;GO:0032869;GO:0035272;GO:0010832;GO:0002070;GO:0042149;GO:0048010;GO:…	BP:fatty acid biosynthetic process;BP:positive regulation of hepatocyte proliferation;BP:positive regulation of histone methylation;BP:negative regulation of endoplasmic reticulum unfolded protein response;BP:ATF6-mediated unfolded protein response;BP:cellular triglyceride homeostasis;BP:positive regulation of T cell differentiation;BP:positive regulation of immunoglobulin secretion;BP:adipose ti…	ENSG00000100219	XBP1	X-box binding protein 1 [Source:HGNC Symbol;Acc:HGNC:12801]	164.365	81.39
GO:0043547;GO:0006470;GO:0007283;GO:0016021;GO:0005634;GO:0008138;GO:0017112;GO:001920	BP:positive regulation of GTPase activity;BP:protein dephosphorylation;BP:spermatogenesis;CC:integral component of membrane;CC:nucleus;MF:protein tyrosine/serine/threonine phosphatase activity;MF:Rab guanyl-nucleotide exchange factor activity;MF:phosphatase regulator activity;	ENSG00000100241	SBF1	SET binding factor 1 [Source:HGNC Symbol;Acc:HGNC:10542]	36.425	22.985
GO:0090200;GO:0008584;GO:0007283;GO:0032464;GO:0008637;GO:0008584;GO:0007283;GO:0006915;GO:0042981;GO:0006915;GO:0006915;GO:0032464;GO:0090200;GO:0016021;GO:0005740;GO:0012505;GO:0031966;GO:0005740;GO:0005739;GO:0016021;GO:0016020;GO:0031966;GO:0012505;GO:0046982;GO:0051400;GO:0051400;GO:0046982;GO:0005515;GO:000551	BP:positive regulation of release of cytochrome c from mitochondria;BP:male gonad development;BP:spermatogenesis;BP:positive regulation of protein homooligomerization;BP:apoptotic mitochondrial changes;BP:male gonad development;BP:spermatogenesis;BP:apoptotic process;BP:regulation of apoptotic process;BP:apoptotic process;BP:apoptotic process;BP:positive regulation of protein homooligomerization;…	ENSG00000100290	BIK	BCL2 interacting killer [Source:HGNC Symbol;Acc:HGNC:1051]	0.88	0.12
GO:0032148;GO:0045737;GO:0031954;GO:0048146;GO:0038001;GO:0043406;GO:0018105;GO:0045893;GO:0050921;GO:1902895;GO:0032868;GO:0001666;GO:0010512;GO:0032091;GO:0032355;GO:0016049;GO:0002576;GO:0048661;GO:0070528;GO:0014911;GO:0010544;GO:0045740;GO:1905176;GO:0045840;GO:1904754;GO:0070374;GO:2000573;GO:1904707;GO:2000379;GO:0007507;GO:0046854;GO:0002548;GO:0061098;GO:0072255;GO:0045892;GO:0014068;GO:…	BP:activation of protein kinase B activity;BP:positive regulation of cyclin-dependent protein serine/threonine kinase activity;BP:positive regulation of protein autophosphorylation;BP:positive regulation of fibroblast proliferation;BP:paracrine signaling;BP:positive regulation of MAP kinase activity;BP:peptidyl-serine phosphorylation;BP:positive regulation of transcription, DNA-templated;BP:posit…	ENSG00000100311	PDGFB	platelet derived growth factor subunit B [Source:HGNC Symbol;Acc:HGNC:8800]	49.44	141.85
GO:0006810;GO:0006954;GO:0006869;GO:0006953;GO:0042157;GO:0060135;GO:0008203;GO:0007275;GO:0043123;GO:0016020;GO:0005789;GO:0005576;GO:0005319;GO:0008035;GO:0008289;GO:0004871;GO:000510	BP:transport;BP:inflammatory response;BP:lipid transport;BP:acute-phase response;BP:lipoprotein metabolic process;BP:maternal process involved in female pregnancy;BP:cholesterol metabolic process;BP:multicellular organism development;BP:positive regulation of I-kappaB kinase/NF-kappaB signaling;CC:membrane;CC:endoplasmic reticulum membrane;CC:extracellular region;MF:lipid transporter activity;MF:…	ENSG00000100336	APOL4	apolipoprotein L4 [Source:HGNC Symbol;Acc:HGNC:14867]	6.005	0.205
GO:0019835;GO:0006898;GO:0006869;GO:0008202;GO:1902476;GO:0045087;GO:0031640;GO:0042157;GO:0008203;GO:0034361;GO:0034364;GO:0016020;GO:0072562;GO:0005576;GO:0031224;GO:0008289;GO:0005515;GO:000525	BP:cytolysis;BP:receptor-mediated endocytosis;BP:lipid transport;BP:steroid metabolic process;BP:chloride transmembrane transport;BP:innate immune response;BP:killing of cells of other organism;BP:lipoprotein metabolic process;BP:cholesterol metabolic process;CC:very-low-density lipoprotein particle;CC:high-density lipoprotein particle;CC:membrane;CC:blood microparticle;CC:extracellular region;CC…	ENSG00000100342	APOL1	apolipoprotein L1 [Source:HGNC Symbol;Acc:HGNC:618]	370.065	57.71
GO:0006955;GO:0002479;GO:0043085;GO:0048010;GO:0045454;GO:0055114;GO:0005829;GO:0032010;GO:0043020;GO:0010008;GO:0035091;GO:0032266;GO:0016176;GO:004698	BP:immune response;BP:antigen processing and presentation of exogenous peptide antigen via MHC class I, TAP-dependent;BP:positive regulation of catalytic activity;BP:vascular endothelial growth factor receptor signaling pathway;BP:cell redox homeostasis;BP:oxidation-reduction process;CC:cytosol;CC:phagolysosome;CC:NADPH oxidase complex;CC:endosome membrane;MF:phosphatidylinositol binding;MF:phosp…	ENSG00000100365	NCF4	neutrophil cytosolic factor 4 [Source:HGNC Symbol;Acc:HGNC:7662]	11.87	0.37
GO:0038156;GO:0019221;GO:0043547;GO:0000165;GO:0018108;GO:0038043;GO:0036016;GO:0007585;GO:0030526;GO:0016021;GO:0005622;GO:0004914;GO:0004912;GO:0005088;GO:0004713;GO:0005515;GO:000489	BP:interleukin-3-mediated signaling pathway;BP:cytokine-mediated signaling pathway;BP:positive regulation of GTPase activity;BP:MAPK cascade;BP:peptidyl-tyrosine phosphorylation;BP:interleukin-5-mediated signaling pathway;BP:cellular response to interleukin-3;BP:respiratory gaseous exchange;CC:granulocyte macrophage colony-stimulating factor receptor complex;CC:integral component of membrane;CC:i…	ENSG00000100368	CSF2RB	colony stimulating factor 2 receptor beta common subunit [Source:HGNC Symbol;Acc:HGNC:2436]	224.59	45.65
GO:0043547;GO:0007165;GO:0043547;GO:0031965;GO:0005829;GO:0043231;GO:0005096;GO:000509	BP:positive regulation of GTPase activity;BP:signal transduction;BP:positive regulation of GTPase activity;CC:nuclear membrane;CC:cytosol;CC:intracellular membrane-bounded organelle;MF:GTPase activator activity;MF:GTPase activator activity;	ENSG00000100401	RANGAP1	Ran GTPase activating protein 1 [Source:HGNC Symbol;Acc:HGNC:9854]	206.45	101.39
GO:0016032;GO:0005634;GO:0044822;GO:0046872;GO:000551	BP:viral process;CC:nucleus;MF:pol;MF:metal ion binding;MF:protein binding;	ENSG00000100403	ZC3H7B	zinc finger CCCH-type containing 7B [Source:HGNC Symbol;Acc:HGNC:30869]	127.1	63.5
GO:0070201;GO:0060271;GO:0007224;GO:0005737;GO:0036064;GO:000581	BP:regulation of establishment of protein localization;BP:cilium assembly;BP:smoothened signaling pathway;CC:cytoplasm;CC:ciliary basal body;CC:centrosome;	ENSG00000100578	KIAA0586	KIAA0586 [Source:HGNC Symbol;Acc:HGNC:19960]	1.69	3.54
GO:0034504;GO:0008582;GO:0061551;GO:0008584;GO:0043524;GO:0045892;GO:0051451;GO:0072075;GO:0032880;GO:0030910;GO:0006355;GO:0048538;GO:0072095;GO:0061197;GO:0048701;GO:0030238;GO:0060037;GO:0090190;GO:0098528;GO:0061055;GO:0048699;GO:0042472;GO:0050678;GO:0072107;GO:0006355;GO:0045944;GO:0045214;GO:1902725;GO:0005737;GO:0005634;GO:0005634;GO:0001077;GO:0043565;GO:0043565;GO:0003677;GO:0003677;GO:…	BP:protein localization to nucleus;BP:regulation of synaptic growth at neuromuscular junction;BP:trigeminal ganglion development;BP:male gonad development;BP:negative regulation of neuron apoptotic process;BP:negative regulation of transcription, DNA-templated;BP:myoblast migration;BP:metanephric mesenchyme development;BP:regulation of protein localization;BP:olfactory placode formation;BP:regula…	ENSG00000100625	SIX4	SIX homeobox 4 [Source:HGNC Symbol;Acc:HGNC:10890]	0.39	1.45
GO:0051049;GO:0031325;GO:0010604;GO:0032496;GO:0035556;GO:0014070;GO:0007253;GO:0070417;GO:0071310;GO:0043066;GO:0032270;GO:0010745;GO:0002221;GO:0002223;GO:0050852;GO:0006606;GO:0038095;GO:0043392;GO:0051235;GO:0010033;GO:0010875;GO:1901700;GO:0051092;GO:0009605;GO:0070423;GO:0032088;GO:0006355;GO:0045944;GO:1901698;GO:0048523;GO:0010888;GO:0005634;GO:0033256;GO:0005886;GO:0005829;GO:0044424;GO:…	BP:regulation of transport;BP:positive regulation of cellular metabolic process;BP:positive regulation of macromolecule metabolic process;BP:response to lipopolysaccharide;BP:intracellular signal transduction;BP:response to organic cyclic compound;BP:cytoplasmic sequestering of NF-kappaB;BP:cellular response to cold;BP:cellular response to organic substance;BP:negative regulation of apoptotic pro…	ENSG00000100906	NFKBIA	NFKB inhibitor alpha [Source:HGNC Symbol;Acc:HGNC:7797]	318.65	51.96
GO:0000398;GO:0006355;GO:0007155;GO:0016607;GO:0035145;GO:0005886;GO:0030057;GO:0005882;GO:0071013;GO:0044822;GO:0005198;GO:000367	BP:mRNA splicing, via spliceosome;BP:regulation of transcription, DNA-templated;BP:cell adhesion;CC:nuclear speck;CC:exon-exon junction complex;CC:plasma membrane;CC:desmosome;CC:intermediate filament;CC:catalytic step 2 spliceosome;MF:pol;MF:structural molecule activity;MF:DNA binding;	ENSG00000100941	PNN	pinin, desmosome associated protein [Source:HGNC Symbol;Acc:HGNC:9162]	4.505	12.89
GO:0000086;GO:0005829;GO:0005815;GO:0005874;GO:0005509;GO:000551	BP:G2/M transition of mitotic cell cycle;CC:cytosol;CC:microtubule organizing center;CC:microtubule;MF:calcium ion binding;MF:protein binding;	ENSG00000101004	NINL	ninein like [Source:HGNC Symbol;Acc:HGNC:29163]	2.035	5.115
GO:0071222;GO:0048304;GO:0071260;GO:0033209;GO:0097190;GO:0051023;GO:0043547;GO:0042511;GO:0043123;GO:0030890;GO:0051092;GO:0006874;GO:0006461;GO:2000353;GO:0006954;GO:0030168;GO:0090037;GO:0051607;GO:0043406;GO:0043491;GO:0045944;GO:0002768;GO:0032735;GO:0042832;GO:0035631;GO:0009897;GO:0005737;GO:0005615;GO:0070062;GO:0043231;GO:0005031;GO:0031625;GO:000382	BP:cellular response to lipopolysaccharide;BP:positive regulation of isotype switching to IgG isotypes;BP:cellular response to mechanical stimulus;BP:tumor necrosis factor-mediated signaling pathway;BP:apoptotic signaling pathway;BP:regulation of immunoglobulin secretion;BP:positive regulation of GTPase activity;BP:positive regulation of tyrosine phosphorylation of Stat1 protein;BP:positive regul…	ENSG00000101017	CD40	CD40 molecule [Source:HGNC Symbol;Acc:HGNC:11919]	93.925	23.675
GO:0051386;GO:0007399;GO:0000165;GO:0005622;GO:0005057;GO:000515	BP:regulation of neurotrophin TRK receptor signaling pathway;BP:nervous system development;BP:MAPK cascade;CC:intracellular;MF:signal transducer activity, downstream of receptor;MF:insulin receptor binding;	ENSG00000101134	DOK5	docking protein 5 [Source:HGNC Symbol;Acc:HGNC:16173]	13.065	6.55
GO:0016079;GO:0043524;GO:0043312;GO:0007269;GO:0016079;GO:0006887;GO:0045055;GO:0043524;GO:0008021;GO:0043195;GO:0070062;GO:0042470;GO:0005829;GO:0043195;GO:0008021;GO:0042470;GO:0005886;GO:0005886;GO:0005739;GO:0005765;GO:0016020;GO:0016020;GO:0005886;GO:0070062;GO:0035579;GO:0035577;GO:0061202;GO:0005739;GO:0005765;GO:0005886;GO:0016021;GO:0061202;GO:0001948;GO:0043008;GO:0001948;GO:004300	BP:synaptic vesicle exocytosis;BP:negative regulation of neuron apoptotic process;BP:neutrophil degranulation;BP:neurotransmitter secretion;BP:synaptic vesicle exocytosis;BP:exocytosis;BP:regulated exocytosis;BP:negative regulation of neuron apoptotic process;CC:synaptic vesicle;CC:terminal bouton;CC:extracellular exosome;CC:melanosome;CC:cytosol;CC:terminal bouton;CC:synaptic vesicle;CC:melanoso…	ENSG00000101152	DNAJC5	DnaJ heat shock protein family (Hsp40) member C5 [Source:HGNC Symbol;Acc:HGNC:16235]	48.78	31.905
GO:0051602;GO:0010035;GO:0090218;GO:0006412;GO:0006414;GO:0006414;GO:1904714;GO:0090218;GO:1904714;GO:0043065;GO:0006414;GO:0005737;GO:0005853;GO:0043209;GO:0005634;GO:0098574;GO:0005737;GO:0005737;GO:0098574;GO:0043025;GO:0003924;GO:0003924;GO:0005515;GO:0005525;GO:0000166;GO:0005525;GO:0003746;GO:0003746;GO:0003924;GO:0008135;GO:0019901;GO:0003746;GO:0019901;GO:0003746;GO:000552	BP:response to electrical stimulus;BP:response to inorganic substance;BP:positive regulation of lipid kinase activity;BP:translation;BP:translational elongation;BP:translational elongation;BP:regulation of chaperone-mediated autophagy;BP:positive regulation of lipid kinase activity;BP:regulation of chaperone-mediated autophagy;BP:positive regulation of apoptotic process;BP:translational elongatio…	ENSG00000101210	EEF1A2	eukaryotic translation elongation factor 1 alpha 2 [Source:HGNC Symbol;Acc:HGNC:3192]	0.9	0.5
GO:0043161;GO:0042787;GO:0000209;GO:0043161;GO:0042787;GO:0000209;GO:0016021;GO:0000139;GO:0005794;GO:0005794;GO:0016021;GO:0016020;GO:0000139;GO:0008270;GO:0005515;GO:0061630;GO:0005515;GO:0046872;GO:0008270;GO:006163	BP:proteasome-mediated ubiquitin-dependent protein catabolic process;BP:protein ubiquitination involved in ubiquitin-dependent protein catabolic process;BP:protein polyubiquitination;BP:proteasome-mediated ubiquitin-dependent protein catabolic process;BP:protein ubiquitination involved in ubiquitin-dependent protein catabolic process;BP:protein polyubiquitination;CC:integral component of membrane…	ENSG00000101236	RNF24	ring finger protein 24 [Source:HGNC Symbol;Acc:HGNC:13779]	13.845	3.17
GO:0032436;GO:1903507;GO:0010827;GO:0032869;GO:0032092;GO:0000122;GO:0006468;GO:0006469;GO:1903507;GO:0045599;GO:0051443;GO:0043405;GO:0070059;GO:0045717;GO:0005654;GO:0005730;GO:0031965;GO:0005886;GO:0005829;GO:0003714;GO:0055106;GO:0003714;GO:0004672;GO:0005524;GO:0016301;GO:0004860;GO:0019901;GO:0031625;GO:003143	BP:positive regulation of proteasomal ubiquitin-dependent protein catabolic process;BP:negative regulation of nucleic acid-templated transcription;BP:regulation of glucose transport;BP:cellular response to insulin stimulus;BP:positive regulation of protein binding;BP:negative regulation of transcription from RNA polymerase II promoter;BP:protein phosphorylation;BP:negative regulation of protein k…	ENSG00000101255	TRIB3	tribbles pseudokinase 3 [Source:HGNC Symbol;Acc:HGNC:16228]	4.63	16.185
GO:0043065;GO:0045670;GO:0038168;GO:0031954;GO:0033137;GO:0007165;GO:0046330;GO:0050821;GO:0001501;GO:0045667;GO:1901223;GO:0046849;GO:0045860;GO:0007049;GO:0048872;GO:0005737;GO:0005634;GO:0043234;GO:0005515;GO:000467	BP:positive regulation of apoptotic process;BP:regulation of osteoclast differentiation;BP:epidermal growth factor receptor signaling pathway via I-kappaB kinase/NF-kappaB cascade;BP:positive regulation of protein autophosphorylation;BP:negative regulation of peptidyl-serine phosphorylation;BP:signal transduction;BP:positive regulation of JNK cascade;BP:protein stabilization;BP:skeletal system de…	ENSG00000101265	RASSF2	Ras association domain family member 2 [Source:HGNC Symbol;Acc:HGNC:9883]	4.245	14.06
GO:0055017;GO:0032091;GO:0034111;GO:0003209;GO:0042060;GO:0090271;GO:000322	BP:cardiac muscle tissue growth;BP:negative regulation of protein binding;BP:negative regulation of homotypic cell-cell adhesion;BP:cardiac atrium morphogenesis;BP:wound healing;BP:positive regulation of fibroblast growth factor production;BP:ventricular trabecula myocardium morphogenesis;	ENSG00000101331	CCM2L	CCM2 like scaffolding protein [Source:HGNC Symbol;Acc:HGNC:16153]	2.265	6.175
GO:2000737;GO:0061309;GO:0003215;GO:0061444;GO:0002011;GO:0002456;GO:0045445;GO:0032495;GO:0045446;GO:0072070;GO:0072015;GO:0001525;GO:0001709;GO:0045665;GO:0045747;GO:0045669;GO:0061314;GO:0042127;GO:0030334;GO:0030216;GO:0072017;GO:0061073;GO:0035909;GO:0045599;GO:0061156;GO:0097150;GO:0007220;GO:0042491;GO:0001974;GO:0003184;GO:0045639;GO:0045944;GO:0060411;GO:0016021;GO:0005576;GO:0016324;GO:…	BP:negative regulation of stem cell differentiation;BP:cardiac neural crest cell development involved in outflow tract morphogenesis;BP:cardiac right ventricle morphogenesis;BP:endocardial cushion cell development;BP:morphogenesis of an epithelial sheet;BP:T cell mediated immunity;BP:myoblast differentiation;BP:response to muramyl dipeptide;BP:endothelial cell differentiation;BP:loop of Henle dev…	ENSG00000101384	JAG1	jagged 1 [Source:HGNC Symbol;Acc:HGNC:6188]	20.15	9.47
GO:0051298;GO:0000086;GO:0010923;GO:0051225;GO:0000242;GO:0005813;GO:0005829;GO:0005814;GO:001990	BP:centrosome duplication;BP:G2/M transition of mitotic cell cycle;BP:negative regulation of phosphatase activity;BP:spindle assembly;CC:pericentriolar material;CC:centrosome;CC:cytosol;CC:centriole;MF:phosphatase binding;	ENSG00000101639	CEP192	centrosomal protein 192 [Source:HGNC Symbol;Acc:HGNC:25515]	1.255	4.545
GO:0036265;GO:0006370;GO:0006366;GO:0005845;GO:0043235;GO:0005730;GO:0005634;GO:0005654;GO:0004482;GO:0003723;GO:000551	BP:RN;BP:7-methylguanosine mRNA capping;BP:transcription from RNA polymerase II promoter;CC:mRNA cap binding complex;CC:receptor complex;CC:nucleolus;CC:nucleus;CC:nucleoplasm;MF:mRN;MF:RNA binding;MF:protein binding;	ENSG00000101654	RNMT	RNA guanine-7 methyltransferase [Source:HGNC Symbol;Acc:HGNC:10075]	2.125	6.27
GO:0009395;GO:0034375;GO:0010983;GO:0008283;GO:0032376;GO:0043691;GO:0050746;GO:0042632;GO:0044241;GO:0007584;GO:0055091;GO:0006629;GO:0005794;GO:0005615;GO:0005576;GO:0005769;GO:0009986;GO:0008201;GO:0008970;GO:000446	BP:phospholipid catabolic process;BP:high-density lipoprotein particle remodeling;BP:positive regulation of high-density lipoprotein particle clearance;BP:cell proliferation;BP:positive regulation of cholesterol transport;BP:reverse cholesterol transport;BP:regulation of lipoprotein metabolic process;BP:cholesterol homeostasis;BP:lipid digestion;BP:response to nutrient;BP:phospholipid homeostasis…	ENSG00000101670	LIPG	lipase G, endothelial type [Source:HGNC Symbol;Acc:HGNC:6623]	20.57	7.61
GO:0032436;GO:0016567;GO:0000209;GO:0002250;GO:0000139;GO:0031624;GO:0061630;GO:0036435;GO:0008270;GO:001687	BP:positive regulation of proteasomal ubiquitin-dependent protein catabolic process;BP:protein ubiquitination;BP:protein polyubiquitination;BP:adaptive immune response;CC:Golgi membrane;MF:ubiquitin conjugating enzyme binding;MF:ubiquitin protein ligase activity;MF:K48-linked polyubiquitin binding;MF:zinc ion binding;MF:ligase activity;	ENSG00000101695	RNF125	ring finger protein 125 [Source:HGNC Symbol;Acc:HGNC:21150]	0.005	0.085
GO:0042276;GO:0006281;GO:0006260;GO:0005654;GO:0005634;GO:0003887;GO:0005515;GO:0046872;GO:000368	BP:error-prone translesion synthesis;BP:DNA repair;BP:DNA replication;CC:nucleoplasm;CC:nucleus;MF:DNA-directed DNA polymerase activity;MF:protein binding;MF:metal ion binding;MF:damaged DNA binding;	ENSG00000101751	POLI	DNA polymerase iota [Source:HGNC Symbol;Acc:HGNC:9182]	1.755	4.745
GO:0045087;GO:0030154;GO:0045944;GO:0045087;GO:0001787;GO:0001866;GO:0045944;GO:0001866;GO:0001787;GO:0005794;GO:0016605;GO:0031965;GO:0005634;GO:0043565;GO:0000981;GO:0001077;GO:0005515;GO:0000978;GO:000098	BP:innate immune response;BP:cell differentiation;BP:positive regulation of transcription from RNA polymerase II promoter;BP:innate immune response;BP:natural killer cell proliferation;BP:NK T cell proliferation;BP:positive regulation of transcription from RNA polymerase II promoter;BP:NK T cell proliferation;BP:natural killer cell proliferation;CC:Golgi apparatus;CC:PML body;CC:nuclear membrane;…	ENSG00000102034	ELF4	E74 like ETS transcription factor 4 [Source:HGNC Symbol;Acc:HGNC:3319]	28.89	18.205
GO:0051045;GO:0010951;GO:0002576;GO:0043066;GO:1901164;GO:0022617;GO:0008284;GO:0034097;GO:2001044;GO:0042060;GO:0001775;GO:0010951;GO:0043434;GO:0051216;GO:0007568;GO:0005576;GO:0005615;GO:0031093;GO:0005604;GO:0005581;GO:0070062;GO:0005576;GO:0005125;GO:0008191;GO:0008083;GO:0002020;GO:0046872;GO:000819	BP:negative regulation of membrane protein ectodomain proteolysis;BP:negative regulation of endopeptidase activity;BP:platelet degranulation;BP:negative regulation of apoptotic process;BP:negative regulation of trophoblast cell migration;BP:extracellular matrix disassembly;BP:positive regulation of cell proliferation;BP:response to cytokine;BP:regulation of integrin-mediated signaling pathway;BP:…	ENSG00000102265	TIMP1	TIMP metallopeptidase inhibitor 1 [Source:HGNC Symbol;Acc:HGNC:11820]	258	148.055
GO:0016567;GO:0016567;GO:0008150;GO:0005737;GO:0005856;GO:0015630;GO:0005737;GO:0005737;GO:0005815;GO:0005856;GO:0031463;GO:0031463;GO:0003779;GO:0003779;GO:0004842;GO:0003674;GO:000484	BP:protein ubiquitination;BP:protein ubiquitination;BP:biological_process;CC:cytoplasm;CC:cytoskeleton;CC:microtubule cytoskeleton;CC:cytoplasm;CC:cytoplasm;CC:microtubule organizing center;CC:cytoskeleton;CC:Cul3-RING ubiquitin ligase complex;CC:Cul3-RING ubiquitin ligase complex;MF:actin binding;MF:actin binding;MF:ubiquitin-protein transferase activity;MF:molecular_function;MF:ubiquitin-protei…	ENSG00000102271	KLHL4	kelch like family member 4 [Source:HGNC Symbol;Acc:HGNC:6355]	1.085	6.205
GO:0034080;GO:0042699;GO:0034508;GO:0034508;GO:0007062;GO:0005737;GO:0005829;GO:0005654;GO:0000776;GO:0005634;GO:0000776;GO:000551	BP:CENP-A containing nucleosome assembly;BP:follicle-stimulating hormone signaling pathway;BP:centromere complex assembly;BP:centromere complex assembly;BP:sister chromatid cohesion;CC:cytoplasm;CC:cytosol;CC:nucleoplasm;CC:kinetochore;CC:nucleus;CC:kinetochore;MF:protein binding;	ENSG00000102384	CENPI	centromere protein I [Source:HGNC Symbol;Acc:HGNC:3968]	1.59	3.88
GO:1903506;GO:0000124;GO:000371	BP:regulation of nucleic acid-templated transcription;CC:SAGA complex;MF:transcription cofactor activity;	ENSG00000102710	SUPT20H	SPT20 homolog, SAGA complex component [Source:HGNC Symbol;Acc:HGNC:20596]	7.28	19.125
GO:0045600;GO:000573	BP:positive regulation of fat cell differentiation;CC:cytoplasm;	ENSG00000102802	MEDAG	mesenteric estrogen dependent adipogenesis [Source:HGNC Symbol;Acc:HGNC:25926]	1.765	11.805
GO:0008333;GO:0043951;GO:0006513;GO:0045744;GO:0000209;GO:0070062;GO:0005829;GO:0005769;GO:0005886;GO:0005634;GO:0061630;GO:0008270;GO:0005515;GO:001687	BP:endosome to lysosome transport;BP:negative regulation of cAMP-mediated signaling;BP:protein monoubiquitination;BP:negative regulation of G-protein coupled receptor protein signaling pathway;BP:protein polyubiquitination;CC:extracellular exosome;CC:cytosol;CC:early endosome;CC:plasma membrane;CC:nucleus;MF:ubiquitin protein ligase activity;MF:zinc ion binding;MF:protein binding;MF:ligase activi…	ENSG00000102858	MGRN1	mahogunin ring finger 1 [Source:HGNC Symbol;Acc:HGNC:20254]	57.055	25.55
GO:0048613;GO:0090131;GO:0071407;GO:0071345;GO:0061030;GO:0060463;GO:0060461;GO:0060441;GO:0060438;GO:0060425;GO:0051150;GO:0051145;GO:0050728;GO:0048617;GO:0048566;GO:0048371;GO:0048286;GO:0045944;GO:0045198;GO:0043305;GO:0030335;GO:0030324;GO:0030198;GO:0016337;GO:0014822;GO:0010811;GO:0009887;GO:0007498;GO:0007368;GO:0007224;GO:0002053;GO:0001756;GO:0001701;GO:0001570;GO:0000122;GO:0006355;GO:…	BP:embryonic ectodermal digestive tract morphogenesis;BP:mesenchyme migration;BP:cellular response to organic cyclic compound;BP:cellular response to cytokine stimulus;BP:epithelial cell differentiation involved in mammary gland alveolus development;BP:lung lobe morphogenesis;BP:right lung morphogenesis;BP:epithelial tube branching involved in lung morphogenesis;BP:trachea development;BP:lung mor…	ENSG00000103241	FOXF1	forkhead box F1 [Source:HGNC Symbol;Acc:HGNC:3809]	0.73	0.425
GO:0033634;GO:0098655;GO:0033625;GO:0031258;GO:0016021;GO:0033116;GO:0005789;GO:0005261;GO:000838	BP:positive regulation of cell-cell adhesion mediated by integrin;BP:cation transmembrane transport;BP:positive regulation of integrin activation;CC:lamellipodium membrane;CC:integral component of membrane;CC:endoplasmic reticulum-Golgi intermediate compartment membrane;CC:endoplasmic reticulum membrane;MF:cation channel activity;MF:mechanically-gated ion channel activity;	ENSG00000103335	PIEZO1	piezo type mechanosensitive ion channel component 1 [Source:HGNC Symbol;Acc:HGNC:28993]	299.195	191.25
GO:0006879;GO:0042167;GO:0055114;GO:0006788;GO:0001666;GO:0055114;GO:0043231;GO:0016020;GO:0005789;GO:0005886;GO:0004392;GO:0004392;GO:0005515;GO:001649	BP:cellular iron ion homeostasis;BP:heme catabolic process;BP:oxidation-reduction process;BP:heme oxidation;BP:response to hypoxia;BP:oxidation-reduction process;CC:intracellular membrane-bounded organelle;CC:membrane;CC:endoplasmic reticulum membrane;CC:plasma membrane;MF:heme oxygenas;MF:heme oxygenas;MF:protein binding;MF:oxidoreductase activity;	ENSG00000103415	HMOX2	heme oxygenase 2 [Source:HGNC Symbol;Acc:HGNC:5014]	153.115	64
GO:0016021;GO:0005739;GO:001678	CC:integral component of membrane;CC:mitochondrion;MF:hydrolase activity;	ENSG00000103642	LACTB	lactamase beta [Source:HGNC Symbol;Acc:HGNC:16468]	51.12	18.015
GO:0030335;GO:0030213;GO:0030214;GO:0010800;GO:0007605;GO:1900020;GO:0051281;GO:0090314;GO:0030665;GO:0005783;GO:0005634;GO:0005576;GO:0005905;GO:0005886;GO:0032050;GO:0005540;GO:0046923;GO:000441	BP:positive regulation of cell migration;BP:hyaluronan biosynthetic process;BP:hyaluronan catabolic process;BP:positive regulation of peptidyl-threonine phosphorylation;BP:sensory perception of sound;BP:positive regulation of protein kinase C activity;BP:positive regulation of release of sequestered calcium ion into cytosol;BP:positive regulation of protein targeting to membrane;CC:clathrin-coate…	ENSG00000103888	CEMIP	cell migration inducing hyaluronan binding protein [Source:HGNC Symbol;Acc:HGNC:29213]	3.375	0.515
GO:0030030;GO:0000086;GO:0007099;GO:0098535;GO:0005654;GO:0000242;GO:0005829;GO:0005814;GO:0098536;GO:001990	BP:cell projection organization;BP:G2/M transition of mitotic cell cycle;BP:centriole replication;BP:de novo centriole assembly involved in multi-ciliated epithelial cell differentiation;CC:nucleoplasm;CC:pericentriolar material;CC:cytosol;CC:centriole;CC:deuterosome;MF:protein kinase binding;	ENSG00000103995	CEP152	centrosomal protein 152 [Source:HGNC Symbol;Acc:HGNC:29298]	0.31	1.135
GO:0006915;GO:2001244;GO:0090200;GO:1900740;GO:0043276;GO:0032464;GO:0016459;GO:0005829;GO:0005741;GO:0001669;GO:0005886;GO:000551	BP:apoptotic process;BP:positive regulation of intrinsic apoptotic signaling pathway;BP:positive regulation of release of cytochrome c from mitochondria;BP:positive regulation of protein insertion into mitochondrial membrane involved in apoptotic signaling pathway;BP:anoikis;BP:positive regulation of protein homooligomerization;CC:myosin complex;CC:cytosol;CC:mitochondrial outer membrane;CC:acros…	ENSG00000104081	BMF	Bcl2 modifying factor [Source:HGNC Symbol;Acc:HGNC:24132]	0.69	3.87
GO:0030672;GO:0005615;GO:0030054;GO:001713	CC:synaptic vesicle membrane;CC:extracellular space;CC:cell junction;MF:Rab GTPase binding;	ENSG00000104093	DMXL2	Dmx like 2 [Source:HGNC Symbol;Acc:HGNC:2938]	1.165	2.01
GO:0007186;GO:0035791;GO:0005576;GO:0005019;GO:000499	BP:G-protein coupled receptor signaling pathway;BP:platelet-derived growth factor receptor-beta signaling pathway;CC:extracellular region;MF:platelet-derived growth factor beta-receptor activity;MF:platelet activating factor receptor activity;	ENSG00000104213	PDGFRL	platelet derived growth factor receptor like [Source:HGNC Symbol;Acc:HGNC:8805]	15.76	10.6
GO:0009887;GO:0048873;GO:0045453;GO:0010468;GO:0046622;GO:2001240;GO:0030890;GO:0045582;GO:2001237;GO:0002360;GO:0007267;GO:0006959;GO:0043086;GO:0006955;GO:0005576;GO:0005615;GO:0005125;GO:0008083;GO:0005139;GO:0008083;GO:000513	BP:animal organ morphogenesis;BP:homeostasis of number of cells within a tissue;BP:bone resorption;BP:regulation of gene expression;BP:positive regulation of organ growth;BP:negative regulation of extrinsic apoptotic signaling pathway in absence of ligand;BP:positive regulation of B cell proliferation;BP:positive regulation of T cell differentiation;BP:negative regulation of extrinsic apoptotic s…	ENSG00000104432	IL7	interleukin 7 [Source:HGNC Symbol;Acc:HGNC:6023]	1.685	0.02
GO:0031668;GO:0045087;GO:0050718;GO:0070269;GO:0006954;GO:0072559;GO:0005654;GO:000551	BP:cellular response to extracellular stimulus;BP:innate immune response;BP:positive regulation of interleukin-1 beta secretion;BP:pyroptosis;BP:inflammatory response;CC:NLRP3 inflammasome complex;CC:nucleoplasm;MF:protein binding;	ENSG00000104518	GSDMD	gasdermin D [Source:HGNC Symbol;Acc:HGNC:25697]	115.125	66.38
GO:0010923;GO:0005737;GO:001990	BP:negative regulation of phosphatase activity;CC:cytoplasm;MF:phosphatase binding;	ENSG00000104611	SH2D4A	SH2 domain containing 4A [Source:HGNC Symbol;Acc:HGNC:26102]	0.23	1.06
GO:0051092;GO:0007165;GO:0005829;GO:0004871;GO:0003713;GO:000551	BP:positive regulation of NF-kappaB transcription factor activity;BP:signal transduction;CC:cytosol;MF:signal transducer activity;MF:transcription coactivator activity;MF:protein binding;	ENSG00000104825	NFKBIB	NFKB inhibitor beta [Source:HGNC Symbol;Acc:HGNC:7798]	53.335	23.14
GO:0006357;GO:0005737;GO:0005634;GO:0003700;GO:000367	BP:regulation of transcription from RNA polymerase II promoter;CC:cytoplasm;CC:nucleus;MF:transcription factor activity, sequence-specific DNA binding;MF:DNA binding;	ENSG00000104856	RELB	RELB proto-oncogene, NF-kB subunit [Source:HGNC Symbol;Acc:HGNC:9956]	113.615	15.135
GO:0030183;GO:0001955;GO:0006355;GO:0045893;GO:0060216;GO:0030097;GO:0005634;GO:0005488;GO:0003677;GO:0005515;GO:0000981;GO:000097	BP:B cell differentiation;BP:blood vessel maturation;BP:regulation of transcription, DNA-templated;BP:positive regulation of transcription, DNA-templated;BP:definitive hemopoiesis;BP:hemopoiesis;CC:nucleus;MF:binding;MF:DNA binding;MF:protein binding;MF:RNA polymerase II transcription factor activity, sequence-specific DNA binding;MF:RNA polymerase II regulatory region sequence-specific DNA bindi…	ENSG00000104903	LYL1	LYL1, basic helix-loop-helix family member [Source:HGNC Symbol;Acc:HGNC:6734]	8.24	71.675
GO:0006559;GO:0055114;GO:0005576;GO:0016491;GO:0016491;GO:000171	BP:L-phenylalanine catabolic process;BP:oxidation-reduction process;CC:extracellular region;MF:oxidoreductase activity;MF:oxidoreductase activity;MF:L-amino-acid oxidase activity;	ENSG00000104951	IL4I1	interleukin 4 induced 1 [Source:HGNC Symbol;Acc:HGNC:19094]	69.915	15.765
GO:0007626;GO:0009306;GO:0007601;GO:0051152;GO:0097060;GO:0032281;GO:0005634;GO:0005737;GO:0005576;GO:0030054;GO:000551	BP:locomotory behavior;BP:protein secretion;BP:visual perception;BP:positive regulation of smooth muscle cell differentiation;CC:synaptic membrane;CC:AMPA glutamate receptor complex;CC:nucleus;CC:cytoplasm;CC:extracellular region;CC:cell junction;MF:protein binding;	ENSG00000105088	OLFM2	olfactomedin 2 [Source:HGNC Symbol;Acc:HGNC:17189]	29.025	5.1
GO:0046641;GO:0042098;GO:0042088;GO:0019221;GO:0045078;GO:0006959;GO:0005615;GO:0016020;GO:0005886;GO:0005125;GO:0045523;GO:000489	BP:positive regulation of alpha-beta T cell proliferation;BP:T cell proliferation;BP:T-helper 1 type immune response;BP:cytokine-mediated signaling pathway;BP:positive regulation of interferon-gamma biosynthetic process;BP:humoral immune response;CC:extracellular space;CC:membrane;CC:plasma membrane;MF:cytokine activity;MF:interleukin-27 receptor binding;MF:cytokine receptor activity;	ENSG00000105246	EBI3	Epstein-Barr virus induced 3 [Source:HGNC Symbol;Acc:HGNC:3129]	10.405	2.79
GO:0008284;GO:0090344;GO:0031572;GO:0006281;GO:0070979;GO:0070306;GO:0050790;GO:0031145;GO:0051437;GO:0040020;GO:0051436;GO:0007067;GO:0051301;GO:0005829;GO:0031965;GO:0005654;GO:0005680;GO:0097027;GO:001099	BP:positive regulation of cell proliferation;BP:negative regulation of cell aging;BP:G2 DNA damage checkpoint;BP:DNA repair;BP:protein K11-linked ubiquitination;BP:lens fiber cell differentiation;BP:regulation of catalytic activity;BP:anaphase-promoting complex-dependent catabolic process;BP:positive regulation of ubiquitin-protein ligase activity involved in regulation of mitotic cell cycle tran…	ENSG00000105325	FZR1	fizzy and cell division cycle 20 related 1 [Source:HGNC Symbol;Acc:HGNC:24824]	29.98	18.085
GO:0006974;GO:0045926;GO:0006919;GO:0097194;GO:0090200;GO:1902237;GO:0051209;GO:1903896;GO:0008340;GO:1900740;GO:0043525;GO:0071456;GO:0032464;GO:0070245;GO:0097193;GO:0032471;GO:0005739;GO:0005783;GO:0005829;GO:0005741;GO:000551	BP:cellular response to DNA damage stimulus;BP:negative regulation of growth;BP:activation of cysteine-type endopeptidase activity involved in apoptotic process;BP:execution phase of apoptosis;BP:positive regulation of release of cytochrome c from mitochondria;BP:positive regulation of endoplasmic reticulum stress-induced intrinsic apoptotic signaling pathway;BP:release of sequestered calcium ion…	ENSG00000105327	BBC3	BCL2 binding component 3 [Source:HGNC Symbol;Acc:HGNC:17868]	58.515	28.935
GO:0050776;GO:0016337;GO:0007155;GO:0016337;GO:0050776;GO:0007155;GO:0030198;GO:0030198;GO:0005737;GO:0005615;GO:0005576;GO:0005886;GO:0016020;GO:0016021;GO:0016020;GO:0005886;GO:0005887;GO:0005886;GO:0016021;GO:0005887;GO:0005178;GO:000517	BP:regulation of immune response;BP:single organismal cell-cell adhesion;BP:cell adhesion;BP:single organismal cell-cell adhesion;BP:regulation of immune response;BP:cell adhesion;BP:extracellular matrix organization;BP:extracellular matrix organization;CC:cytoplasm;CC:extracellular space;CC:extracellular region;CC:plasma membrane;CC:membrane;CC:integral component of membrane;CC:membrane;CC:plasm…	ENSG00000105371	ICAM4	intercellular adhesion molecule 4 (Landsteiner-Wiener blood group) [Source:HGNC Symbol;Acc:HGNC:5347]	1.245	0.285
GO:0050776;GO:0016337;GO:0030198;GO:0006909;GO:0016021;GO:0005887;GO:000517	BP:regulation of immune response;BP:single organismal cell-cell adhesion;BP:extracellular matrix organization;BP:phagocytosis;CC:integral component of membrane;CC:integral component of plasma membrane;MF:integrin binding;	ENSG00000105376	ICAM5	intercellular adhesion molecule 5 [Source:HGNC Symbol;Acc:HGNC:5348]	0.23	0.055
GO:0006919;GO:0050718;GO:0043124;GO:0072559;GO:0005654;GO:0008656;GO:0032089;GO:004280	BP:activation of cysteine-type endopeptidase activity involved in apoptotic process;BP:positive regulation of interleukin-1 beta secretion;BP:negative regulation of I-kappaB kinase/NF-kappaB signaling;CC:NLRP3 inflammasome complex;CC:nucleoplasm;MF:cysteine-type endopeptidase activator activity involved in apoptotic process;MF:NACHT domain binding;MF:protein homodimerization activity;	ENSG00000105483	CARD8	caspase recruitment domain family member 8 [Source:HGNC Symbol;Acc:HGNC:17057]	10.625	32.525
GO:0045453;GO:0015031;GO:0006810;GO:0006887;GO:0043312;GO:0045453;GO:1903307;GO:0015031;GO:1903307;GO:0007264;GO:0018125;GO:0070062;GO:0005886;GO:0005739;GO:0005881;GO:0005886;GO:0016020;GO:0005886;GO:0070062;GO:0035577;GO:0005881;GO:0099503;GO:0042588;GO:0030133;GO:0005622;GO:0031489;GO:0003924;GO:0051020;GO:0003924;GO:0005525;GO:0000166;GO:0005525;GO:0031489;GO:0003924;GO:000552	BP:bone resorption;BP:protein transport;BP:transport;BP:exocytosis;BP:neutrophil degranulation;BP:bone resorption;BP:positive regulation of regulated secretory pathway;BP:protein transport;BP:positive regulation of regulated secretory pathway;BP:small GTPase mediated signal transduction;BP:peptidyl-cysteine methylation;CC:extracellular exosome;CC:plasma membrane;CC:mitochondrion;CC:cytoplasmic mi…	ENSG00000105514	RAB3D	RAB3D, member RAS oncogene family [Source:HGNC Symbol;Acc:HGNC:9779]	2.475	7.655
GO:0005737;GO:0016020;GO:000554	CC:cytoplasm;CC:membrane;MF:1-phosphatidylinositol binding;	ENSG00000105559	PLEKHA4	pleckstrin homology domain containing A4 [Source:HGNC Symbol;Acc:HGNC:14339]	25.87	13.225
GO:0035771;GO:0071104;GO:0018108;GO:0050778;GO:0035556;GO:0045221;GO:0043547;GO:0038083;GO:0000165;GO:0043029;GO:0032693;GO:0032695;GO:0070669;GO:0016477;GO:0045626;GO:0030183;GO:0042104;GO:0045087;GO:0007262;GO:0002731;GO:0070244;GO:0051928;GO:0060397;GO:0007204;GO:0042506;GO:0070672;GO:0005856;GO:0016020;GO:0031234;GO:0012505;GO:0005829;GO:0005088;GO:0004715;GO:0005524;GO:0019903;GO:000510	BP:interleukin-4-mediated signaling pathway;BP:response to interleukin-9;BP:peptidyl-tyrosine phosphorylation;BP:positive regulation of immune response;BP:intracellular signal transduction;BP:negative regulation of FasL biosynthetic process;BP:positive regulation of GTPase activity;BP:peptidyl-tyrosine autophosphorylation;BP:MAPK cascade;BP:T cell homeostasis;BP:negative regulation of interleukin…	ENSG00000105639	JAK3	Janus kinase 3 [Source:HGNC Symbol;Acc:HGNC:6193]	6.045	1.74
GO:0001701;GO:0010923;GO:0006368;GO:0045945;GO:0042795;GO:0042796;GO:0006414;GO:0032968;GO:0016607;GO:0005737;GO:0008023;GO:0015629;GO:0035363;GO:0035327;GO:0005886;GO:0015030;GO:0019902;GO:000374	BP:in utero embryonic development;BP:negative regulation of phosphatase activity;BP:transcription elongation from RNA polymerase II promoter;BP:positive regulation of transcription from RNA polymerase III promoter;BP:snRNA transcription from RNA polymerase II promoter;BP:snRNA transcription from RNA polymerase III promoter;BP:translational elongation;BP:positive regulation of transcription elonga…	ENSG00000105656	ELL	elongation factor for RNA polymerase II [Source:HGNC Symbol;Acc:HGNC:23114]	11.355	7.245
GO:0006355;GO:0005622;GO:0046872;GO:0003676;GO:000367	BP:regulation of transcription, DNA-templated;CC:intracellular;MF:metal ion binding;MF:nucleic acid binding;MF:nucleic acid binding;	ENSG00000105750	ZNF85	zinc finger protein 85 [Source:HGNC Symbol;Acc:HGNC:13160]	1.13	3.895
GO:0042254;GO:0005730;GO:0005739;GO:0005694;GO:0044822;GO:0000287;GO:0003924;GO:0005515;GO:000552	BP:ribosome biogenesis;CC:nucleolus;CC:mitochondrion;CC:chromosome;MF:pol;MF:magnesium ion binding;MF:GTPase activity;MF:protein binding;MF:GTP binding;	ENSG00000105793	GTPBP10	GTP binding protein 10 [Source:HGNC Symbol;Acc:HGNC:25106]	1.75	4.17
GO:0008286;GO:0048661;GO:0007565;GO:0006769;GO:0032922;GO:0009435;GO:0014070;GO:0060612;GO:0007267;GO:0045944;GO:0051770;GO:0005615;GO:0005829;GO:0005654;GO:0030054;GO:0070062;GO:0005125;GO:0004514;GO:0008144;GO:0047280;GO:004280	BP:insulin receptor signaling pathway;BP:positive regulation of smooth muscle cell proliferation;BP:female pregnancy;BP:nicotinamide metabolic process;BP:circadian regulation of gene expression;BP:NAD biosynthetic process;BP:response to organic cyclic compound;BP:adipose tissue development;BP:cell-cell signaling;BP:positive regulation of transcription from RNA polymerase II promoter;BP:positive r…	ENSG00000105835	NAMPT	nicotinamide phosphoribosyltransferase [Source:HGNC Symbol;Acc:HGNC:30092]	89.97	32.5
GO:0006361;GO:0006363;GO:0006362;GO:0006351;GO:0045815;GO:0005736;GO:0015630;GO:0005730;GO:0005654;GO:0001054;GO:000389	BP:transcription initiation from RNA polymerase I promoter;BP:termination of RNA polymerase I transcription;BP:transcription elongation from RNA polymerase I promoter;BP:transcription, DNA-templated;BP:positive regulation of gene expression, epigenetic;CC:DNA-directed RNA polymerase I complex;CC:microtubule cytoskeleton;CC:nucleolus;CC:nucleoplasm;MF:RNA polymerase I activity;MF:DNA-directed RNA …	ENSG00000105849	TWISTNB	TWIST neighbor [Source:HGNC Symbol;Acc:HGNC:18027]	1.875	5.105
GO:0005737;GO:0003950;GO:004687	CC:cytoplasm;MF:NAD+ ADP-ribosyltransferase activity;MF:metal ion binding;	ENSG00000105939	ZC3HAV1	zinc finger CCCH-type containing, antiviral 1 [Source:HGNC Symbol;Acc:HGNC:23721]	25.94	12.715
GO:0043547;GO:000509	BP:positive regulation of GTPase activity;MF:GTPase activator activity;	ENSG00000105963	ADAP1	ArfGAP with dual PH domains 1 [Source:HGNC Symbol;Acc:HGNC:16486]	2.33	0.54
GO:0034504;GO:0006457;GO:0060710;GO:0060715;GO:0030036;GO:0060717;GO:0090084;GO:0032880;GO:0032781;GO:0045892;GO:0045109;GO:1900034;GO:0043154;GO:0030198;GO:0016020;GO:0030018;GO:0005654;GO:0048471;GO:0005829;GO:0031072;GO:0003677;GO:0051087;GO:0051082;GO:000167	BP:protein localization to nucleus;BP:protein folding;BP:chorio-allantoic fusion;BP:syncytiotrophoblast cell differentiation involved in labyrinthine layer development;BP:actin cytoskeleton organization;BP:chorion development;BP:negative regulation of inclusion body assembly;BP:regulation of protein localization;BP:positive regulation of ATPase activity;BP:negative regulation of transcription, DN…	ENSG00000105993	DNAJB6	DnaJ heat shock protein family (Hsp40) member B6 [Source:HGNC Symbol;Acc:HGNC:14888]	127.59	100.6
GO:0060017;GO:0048704;GO:0051216;GO:0010159;GO:0009952;GO:0001974;GO:0048645;GO:0008284;GO:0006355;GO:0021615;GO:0048538;GO:0001525;GO:0030878;GO:0007275;GO:0005634;GO:0005654;GO:0043565;GO:0003700;GO:007183	BP:parathyroid gland development;BP:embryonic skeletal system morphogenesis;BP:cartilage development;BP:specification of animal organ position;BP:anterior/posterior pattern specification;BP:blood vessel remodeling;BP:animal organ formation;BP:positive regulation of cell proliferation;BP:regulation of transcription, DNA-templated;BP:glossopharyngeal nerve morphogenesis;BP:thymus development;BP:ang…	ENSG00000105997	HOXA3	homeobox A3 [Source:HGNC Symbol;Acc:HGNC:5104]	0.98	3.165
GO:0009887;GO:1902367;GO:0001541;GO:0030217;GO:0032092;GO:0007386;GO:0045747;GO:0002315;GO:0007143;GO:0030173;GO:1903561;GO:0046872;GO:003382	BP:animal organ morphogenesis;BP:negative regulation of Notch signaling pathway involved in somitogenesis;BP:ovarian follicle development;BP:T cell differentiation;BP:positive regulation of protein binding;BP:compartment pattern specification;BP:positive regulation of Notch signaling pathway;BP:marginal zone B cell differentiation;BP:female meiotic division;CC:integral component of Golgi membrane…	ENSG00000106003	LFNG	LFNG O-fucosylpeptide 3-beta-N-acetylglucosaminyltransferase [Source:HGNC Symbol;Acc:HGNC:6560]	0.32	2.475
GO:0006355;GO:0007275;GO:0005634;GO:0003700;GO:004356	BP:regulation of transcription, DNA-templated;BP:multicellular organism development;CC:nucleus;MF:transcription factor activity, sequence-specific DNA binding;MF:sequence-specific DNA binding;	ENSG00000106004	HOXA5	homeobox A5 [Source:HGNC Symbol;Acc:HGNC:5106]	1.865	9.58
GO:0045765;GO:0010842;GO:0007166;GO:0005887;GO:0016021;GO:0016021;GO:0016021;GO:0016020;GO:0042813;GO:000551	BP:regulation of angiogenesis;BP:retina layer formation;BP:cell surface receptor signaling pathway;CC:integral component of plasma membrane;CC:integral component of membrane;CC:integral component of membrane;CC:integral component of membrane;CC:membrane;MF:Wnt-activated receptor activity;MF:protein binding;	ENSG00000106025	TSPAN12	tetraspanin 12 [Source:HGNC Symbol;Acc:HGNC:21641]	4.425	11.03
GO:0030154;GO:0007283;GO:0006511;GO:0016579;GO:0036459;GO:0005515;GO:000484	BP:cell differentiation;BP:spermatogenesis;BP:ubiquitin-dependent protein catabolic process;BP:protein deubiquitination;MF:thiol-dependent ubiquitinyl hydrolase activity;MF:protein binding;MF:thiol-dependent ubiquitin-specific protease activity;	ENSG00000106346	USP42	ubiquitin specific peptidase 42 [Source:HGNC Symbol;Acc:HGNC:20068]	9.06	4.555
GO:0006355;GO:0070997;GO:0006366;GO:0009888;GO:0060173;GO:0060021;GO:0007519;GO:0001757;GO:0001525;GO:0006355;GO:0006351;GO:0006366;GO:0006355;GO:0007275;GO:0007275;GO:0045944;GO:0045944;GO:0090051;GO:0008015;GO:0061053;GO:0070997;GO:0008015;GO:0045944;GO:0048731;GO:0048646;GO:0005737;GO:0005634;GO:0016607;GO:0005737;GO:0005634;GO:0005634;GO:0044424;GO:0043565;GO:0003700;GO:0003677;GO:0003677;GO:…	BP:regulation of transcription, DNA-templated;BP:neuron death;BP:transcription from RNA polymerase II promoter;BP:tissue development;BP:limb development;BP:palate development;BP:skeletal muscle tissue development;BP:somite specification;BP:angiogenesis;BP:regulation of transcription, DNA-templated;BP:transcription, DNA-templated;BP:transcription from RNA polymerase II promoter;BP:regulation of tr…	ENSG00000106511	MEOX2	mesenchyme homeobox 2 [Source:HGNC Symbol;Acc:HGNC:7014]	0.52	7.07
GO:0070126;GO:0070125;GO:0006412;GO:0015934;GO:0005739;GO:0005743;GO:0005762;GO:0044822;GO:000373	BP:mitochondrial translational termination;BP:mitochondrial translational elongation;BP:translation;CC:large ribosomal subunit;CC:mitochondrion;CC:mitochondrial inner membrane;CC:mitochondrial large ribosomal subunit;MF:pol;MF:structural constituent of ribosome;	ENSG00000106591	MRPL32	mitochondrial ribosomal protein L32 [Source:HGNC Symbol;Acc:HGNC:14035]	61.88	39.02
GO:1901588;GO:0035371;GO:0005881;GO:0042599;GO:0005875;GO:005101	CC:dendritic microtubule;CC:microtubule plus-end;CC:cytoplasmic microtubule;CC:lamellar body;CC:microtubule associated complex;MF:microtubule plus-end binding;	ENSG00000106665	CLIP2	CAP-Gly domain containing linker protein 2 [Source:HGNC Symbol;Acc:HGNC:2586]	30.355	12.855
GO:0089711;GO:0070779;GO:0051260;GO:0014047;GO:0051938;GO:0006835;GO:0010460;GO:0007268;GO:1903712;GO:0055085;GO:0005887;GO:0016324;GO:0016021;GO:0070062;GO:0015501;GO:0017153;GO:0005314;GO:0033229;GO:0005515;GO:001659	BP:L-glutamate transmembrane transport;BP:D-aspartate import;BP:protein homooligomerization;BP:glutamate secretion;BP:L-glutamate import;BP:dicarboxylic acid transport;BP:positive regulation of heart rate;BP:chemical synaptic transmission;BP:cysteine transmembrane transport;BP:transmembrane transport;CC:integral component of plasma membrane;CC:apical plasma membrane;CC:integral component of membr…	ENSG00000106688	SLC1A1	solute carrier family 1 member 1 [Source:HGNC Symbol;Acc:HGNC:10939]	0.71	4.82
GO:001602	CC:integral component of membrane;	ENSG00000106771	TMEM245	transmembrane protein 245 [Source:HGNC Symbol;Acc:HGNC:1363]	6.69	17.785
GO:0008150;GO:0005604;GO:0016021;GO:0016020;GO:0005575;GO:001602	BP:biological_process;CC:basement membrane;CC:integral component of membrane;CC:membrane;CC:cellular_component;CC:membrane;	ENSG00000106780	MEGF9	multiple EGF like domains 9 [Source:HGNC Symbol;Acc:HGNC:3234]	0.895	3.71
GO:0048469;GO:0021799;GO:0021853;GO:0021800;GO:0005634;GO:0003700;GO:000551	BP:cell maturation;BP:cerebral cortex radially oriented cell migration;BP:cerebral cortex GABAergic interneuron migration;BP:cerebral cortex tangential migration;CC:nucleus;MF:transcription factor activity, sequence-specific DNA binding;MF:protein binding;	ENSG00000106852	LHX6	LIM homeobox 6 [Source:HGNC Symbol;Acc:HGNC:21735]	0.5	3.1
GO:0019046;GO:2000326;GO:0019043;GO:1902236;GO:0090026;GO:0045786;GO:0090045;GO:0002230;GO:0042127;GO:0050930;GO:0042994;GO:0030968;GO:0006990;GO:0051928;GO:0001558;GO:0045944;GO:0043025;GO:0030176;GO:0016604;GO:0005829;GO:0000139;GO:0008140;GO:0001077;GO:0043565;GO:0042803;GO:0031726;GO:0035497;GO:0003700;GO:0000978;GO:000368	BP:release from viral latency;BP:negative regulation of ligand-dependent nuclear receptor transcription coactivator activity;BP:establishment of viral latency;BP:negative regulation of endoplasmic reticulum stress-induced intrinsic apoptotic signaling pathway;BP:positive regulation of monocyte chemotaxis;BP:negative regulation of cell cycle;BP:positive regulation of deacetylase activity;BP:positi…	ENSG00000107175	CREB3	cAMP responsive element binding protein 3 [Source:HGNC Symbol;Acc:HGNC:2347]	88.53	42.685
GO:0009597;GO:0039529;GO:0002230;GO:0032728;GO:0032727;GO:0032725;GO:0030334;GO:0034344;GO:0032480;GO:0042993;GO:0051091;GO:0045944;GO:0043330;GO:0032757;GO:0032755;GO:0015629;GO:0005923;GO:0032587;GO:0005829;GO:0005829;GO:0008270;GO:0003676;GO:0005524;GO:0003690;GO:0042802;GO:0004386;GO:0008270;GO:0005524;GO:0046872;GO:0003676;GO:0003727;GO:000372	BP:detection of virus;BP:RIG-I signaling pathway;BP:positive regulation of defense response to virus by host;BP:positive regulation of interferon-beta production;BP:positive regulation of interferon-alpha production;BP:positive regulation of granulocyte macrophage colony-stimulating factor production;BP:regulation of cell migration;BP:regulation of type III interferon production;BP:negative regul…	ENSG00000107201	DDX58	DExD/H-box helicase 58 [Source:HGNC Symbol;Acc:HGNC:19102]	39.66	17.86
GO:0006357;GO:0000122;GO:0006357;GO:0045944;GO:0005794;GO:0005634;GO:0005634;GO:0005654;GO:0003676;GO:0003677;GO:004687	BP:regulation of transcription from RNA polymerase II promoter;BP:negative regulation of transcription from RNA polymerase II promoter;BP:regulation of transcription from RNA polymerase II promoter;BP:positive regulation of transcription from RNA polymerase II promoter;CC:Golgi apparatus;CC:nucleus;CC:nucleus;CC:nucleoplasm;MF:nucleic acid binding;MF:DNA binding;MF:metal ion binding;	ENSG00000107249	GLIS3	GLIS family zinc finger 3 [Source:HGNC Symbol;Acc:HGNC:28510]	1.805	1.025
GO:0045931;GO:0050852;GO:0030154;GO:1900194;GO:0071425;GO:0050852;GO:0048514;GO:0045931;GO:0045624;GO:0042100;GO:0030097;GO:0006469;GO:0001568;GO:0009967;GO:0006915;GO:0007275;GO:0030154;GO:0007165;GO:0048010;GO:0001525;GO:0071425;GO:1900194;GO:0009967;GO:0042100;GO:0045624;GO:0006469;GO:0048514;GO:0048010;GO:0001525;GO:0007275;GO:0006915;GO:0005886;GO:0005654;GO:0005829;GO:0016020;GO:0005737;GO:…	BP:positive regulation of mitotic cell cycle;BP:T cell receptor signaling pathway;BP:cell differentiation;BP:negative regulation of oocyte maturation;BP:hematopoietic stem cell proliferation;BP:T cell receptor signaling pathway;BP:blood vessel morphogenesis;BP:positive regulation of mitotic cell cycle;BP:positive regulation of T-helper cell differentiation;BP:B cell proliferation;BP:hemopoiesis;B…	ENSG00000107338	SHB	SH2 domain containing adaptor protein B [Source:HGNC Symbol;Acc:HGNC:10838]	24.26	8.16
GO:0043547;GO:0035023;GO:0005737;GO:0005856;GO:0045202;GO:0005795;GO:0030054;GO:0005089;GO:000551	BP:positive regulation of GTPase activity;BP:regulation of Rho protein signal transduction;CC:cytoplasm;CC:cytoskeleton;CC:synapse;CC:Golgi stack;CC:cell junction;MF:Rho guanyl-nucleotide exchange factor activity;MF:protein binding;	ENSG00000107554	DNMBP	dynamin binding protein [Source:HGNC Symbol;Acc:HGNC:30373]	5.645	19.935
GO:0070098;GO:1902230;GO:0008064;GO:0001764;GO:0007411;GO:0001666;GO:0090026;GO:0045785;GO:0048842;GO:0009612;GO:0022029;GO:0045666;GO:2000406;GO:0009314;GO:0007186;GO:0008284;GO:0033603;GO:0031100;GO:0008015;GO:0006874;GO:0050930;GO:0006955;GO:0006935;GO:0006935;GO:0006935;GO:0006952;GO:0050918;GO:0007186;GO:0006935;GO:0006955;GO:0007165;GO:0007155;GO:0060326;GO:1903237;GO:2000107;GO:2000406;GO:…	BP:chemokine-mediated signaling pathway;BP:negative regulation of intrinsic apoptotic signaling pathway in response to DNA damage;BP:regulation of actin polymerization or depolymerization;BP:neuron migration;BP:axon guidance;BP:response to hypoxia;BP:positive regulation of monocyte chemotaxis;BP:positive regulation of cell adhesion;BP:positive regulation of axon extension involved in axon guidanc…	ENSG00000107562	CXCL12	C-X-C motif chemokine ligand 12 [Source:HGNC Symbol;Acc:HGNC:10672]	0.585	2.315
GO:0007165;GO:0006915;GO:0007275;GO:0043524;GO:0001525;GO:0014068;GO:2001240;GO:0033564;GO:0043524;GO:0014068;GO:0001525;GO:2001240;GO:0005886;GO:0016021;GO:0016020;GO:0045121;GO:0016021;GO:0045121;GO:0005886;GO:0005515;GO:0005515;GO:000551	BP:signal transduction;BP:apoptotic process;BP:multicellular organism development;BP:negative regulation of neuron apoptotic process;BP:angiogenesis;BP:positive regulation of phosphatidylinositol 3-kinase signaling;BP:negative regulation of extrinsic apoptotic signaling pathway in absence of ligand;BP:anterior/posterior axon guidance;BP:negative regulation of neuron apoptotic process;BP:positive …	ENSG00000107731	UNC5B	unc-5 netrin receptor B [Source:HGNC Symbol;Acc:HGNC:12568]	1.98	1.12
GO:0010628;GO:0090131;GO:0005737;GO:0030027;GO:0044297;GO:0030175;GO:000552	BP:positive regulation of gene expression;BP:mesenchyme migration;CC:cytoplasm;CC:lamellipodium;CC:cell body;CC:filopodium;MF:ATP binding;	ENSG00000107796	ACTA2	actin, alpha 2, smooth muscle, aorta [Source:HGNC Symbol;Acc:HGNC:130]	23.84	8.38
GO:0044707;GO:0001558;GO:0030154;GO:0016043;GO:0044767;GO:0001503;GO:0044763;GO:0030198;GO:0007275;GO:0005614;GO:0005578;GO:000552	BP:single-multicellular organism process;BP:regulation of cell growth;BP:cell differentiation;BP:cellular component organization;BP:single-organism developmental process;BP:ossification;BP:single-organism cellular process;BP:extracellular matrix organization;BP:multicellular organism development;CC:interstitial matrix;CC:proteinaceous extracellular matrix;MF:insulin-like growth factor binding;	ENSG00000107821	KAZALD1	Kazal type serine peptidase inhibitor domain 1 [Source:HGNC Symbol;Acc:HGNC:25460]	0.705	2.26
GO:000581	CC:centrosome;	ENSG00000107890	ANKRD26	ankyrin repeat domain 26 [Source:HGNC Symbol;Acc:HGNC:29186]	0.375	1.39
GO:0016485;GO:0043085;GO:0005759;GO:0004222;GO:0008047;GO:000827	BP:protein processing;BP:positive regulation of catalytic activity;CC:mitochondrial matrix;MF:metalloendopeptidase activity;MF:enzyme activator activity;MF:zinc ion binding;	ENSG00000107959	PITRM1	pitrilysin metallopeptidase 1 [Source:HGNC Symbol;Acc:HGNC:17663]	97.08	55.34
GO:0000186;GO:0006468;GO:0007049;GO:0006915;GO:0051403;GO:0031295;GO:0005737;GO:0005829;GO:0000287;GO:0005515;GO:0004672;GO:0004709;GO:000552	BP:activation of MAPKK activity;BP:protein phosphorylation;BP:cell cycle;BP:apoptotic process;BP:stress-activated MAPK cascade;BP:T cell costimulation;CC:cytoplasm;CC:cytosol;MF:magnesium ion binding;MF:protein binding;MF:protein kinase activity;MF:MAP kinase kinase kinase activity;MF:ATP binding;	ENSG00000107968	MAP3K8	mitogen-activated protein kinase kinase kinase 8 [Source:HGNC Symbol;Acc:HGNC:6860]	9.955	2.665
GO:0090082;GO:0030326;GO:0033137;GO:0050807;GO:0032526;GO:0042662;GO:0042663;GO:0060325;GO:0090244;GO:1904693;GO:0002090;GO:0032091;GO:0000904;GO:0000122;GO:0001942;GO:0007275;GO:0048642;GO:1900116;GO:1904723;GO:0030178;GO:1904338;GO:0061743;GO:0030514;GO:0060394;GO:1901296;GO:0030900;GO:0051966;GO:0051964;GO:0005886;GO:0031901;GO:0005615;GO:0005576;GO:0004871;GO:0008083;GO:0050750;GO:0048019;GO:…	BP:positive regulation of heart induction by negative regulation of canonical Wnt signaling pathway;BP:embryonic limb morphogenesis;BP:negative regulation of peptidyl-serine phosphorylation;BP:regulation of synapse organization;BP:response to retinoic acid;BP:negative regulation of mesodermal cell fate specification;BP:regulation of endodermal cell fate specification;BP:face morphogenesis;BP:Wnt …	ENSG00000107984	DKK1	dickkopf WNT signaling pathway inhibitor 1 [Source:HGNC Symbol;Acc:HGNC:2891]	8.095	55.05
GO:0006457;GO:0090201;GO:0090200;GO:0071243;GO:1902445;GO:0090324;GO:0010849;GO:0000413;GO:2001243;GO:0070266;GO:2000276;GO:0010939;GO:0032780;GO:0070301;GO:0071277;GO:0002931;GO:0005739;GO:0005753;GO:0005759;GO:0003755;GO:0005515;GO:001601	BP:protein folding;BP:negative regulation of release of cytochrome c from mitochondria;BP:positive regulation of release of cytochrome c from mitochondria;BP:cellular response to arsenic-containing substance;BP:regulation of mitochondrial membrane permeability involved in programmed necrotic cell death;BP:negative regulation of oxidative phosphorylation;BP:regulation of proton-transporting ATPase…	ENSG00000108179	PPIF	peptidylprolyl isomerase F [Source:HGNC Symbol;Acc:HGNC:9259]	65.86	32.59
GO:0051604;GO:0045747;GO:0043312;GO:0045747;GO:0090002;GO:0051604;GO:0090002;GO:0009986;GO:0097197;GO:0005886;GO:0005886;GO:0016021;GO:0016021;GO:0016020;GO:0005886;GO:0005887;GO:0035579;GO:0070821;GO:0005887;GO:0019899;GO:001989	BP:protein maturation;BP:positive regulation of Notch signaling pathway;BP:neutrophil degranulation;BP:positive regulation of Notch signaling pathway;BP:establishment of protein localization to plasma membrane;BP:protein maturation;BP:establishment of protein localization to plasma membrane;CC:cell surface;CC:tetraspanin-enriched microdomain;CC:plasma membrane;CC:plasma membrane;CC:integral compo…	ENSG00000108219	TSPAN14	tetraspanin 14 [Source:HGNC Symbol;Acc:HGNC:23303]	36.61	94.22
GO:0033138;GO:0019221;GO:0071222;GO:0051897;GO:0032092;GO:0030838;GO:0030851;GO:0045639;GO:0008284;GO:2000251;GO:0014068;GO:0006955;GO:1901215;GO:0042993;GO:0050731;GO:0071345;GO:0045944;GO:0005615;GO:0005576;GO:0005125;GO:0019899;GO:0008083;GO:000513	BP:positive regulation of peptidyl-serine phosphorylation;BP:cytokine-mediated signaling pathway;BP:cellular response to lipopolysaccharide;BP:positive regulation of protein kinase B signaling;BP:positive regulation of protein binding;BP:positive regulation of actin filament polymerization;BP:granulocyte differentiation;BP:positive regulation of myeloid cell differentiation;BP:positive regulation…	ENSG00000108342	CSF3	colony stimulating factor 3 [Source:HGNC Symbol;Acc:HGNC:2438]	4.36	1.37
GO:0016180;GO:0042795;GO:0016021;GO:0016020;GO:0031965;GO:0032039;GO:000551	BP:snRNA processing;BP:snRNA transcription from RNA polymerase II promoter;CC:integral component of membrane;CC:membrane;CC:nuclear membrane;CC:integrator complex;MF:protein binding;	ENSG00000108506	INTS2	integrator complex subunit 2 [Source:HGNC Symbol;Acc:HGNC:29241]	0.655	2.165
GO:0007186;GO:0045892;GO:0007264;GO:0007263;GO:0007165;GO:0007186;GO:0007165;GO:0005634;GO:0016020;GO:0005622;GO:0016529;GO:0005886;GO:0048471;GO:0005886;GO:0016020;GO:0016020;GO:0005737;GO:0005634;GO:0048471;GO:0003924;GO:0005515;GO:0003924;GO:0005515;GO:0005525;GO:0000166;GO:0005525;GO:0003924;GO:000552	BP:G-protein coupled receptor signaling pathway;BP:negative regulation of transcription, DNA-templated;BP:small GTPase mediated signal transduction;BP:nitric oxide mediated signal transduction;BP:signal transduction;BP:G-protein coupled receptor signaling pathway;BP:signal transduction;CC:nucleus;CC:membrane;CC:intracellular;CC:sarcoplasmic reticulum;CC:plasma membrane;CC:perinuclear region of cy…	ENSG00000108551	RASD1	ras related dexamethasone induced 1 [Source:HGNC Symbol;Acc:HGNC:15828]	0.755	8
GO:0016192;GO:0030155;GO:0032012;GO:0043547;GO:0031234;GO:0000139;GO:0005829;GO:0008289;GO:0005086;GO:000551	BP:vesicle-mediated transport;BP:regulation of cell adhesion;BP:regulation of ARF protein signal transduction;BP:positive regulation of GTPase activity;CC:extrinsic component of cytoplasmic side of plasma membrane;CC:Golgi membrane;CC:cytosol;MF:lipid binding;MF:ARF guanyl-nucleotide exchange factor activity;MF:protein binding;	ENSG00000108669	CYTH1	cytohesin 1 [Source:HGNC Symbol;Acc:HGNC:9501]	73.065	23.18
GO:0006968;GO:0002576;GO:0006898;GO:0007165;GO:0007155;GO:0006898;GO:0016020;GO:0070062;GO:0072562;GO:0031089;GO:0016020;GO:0031012;GO:0005578;GO:0005044;GO:000504	BP:cellular defense response;BP:platelet degranulation;BP:receptor-mediated endocytosis;BP:signal transduction;BP:cell adhesion;BP:receptor-mediated endocytosis;CC:membrane;CC:extracellular exosome;CC:blood microparticle;CC:platelet dense granule lumen;CC:membrane;CC:extracellular matrix;CC:proteinaceous extracellular matrix;MF:scavenger receptor activity;MF:scavenger receptor activity;	ENSG00000108679	LGALS3BP	galectin 3 binding protein [Source:HGNC Symbol;Acc:HGNC:6564]	9.895	4.55
GO:0070098;GO:2000503;GO:0060326;GO:0048245;GO:0050729;GO:0071356;GO:0010332;GO:0007186;GO:0030593;GO:0006874;GO:0008360;GO:0006955;GO:0007267;GO:0043547;GO:0002548;GO:0007010;GO:0071361;GO:0071347;GO:0071346;GO:0070374;GO:0005615;GO:0005623;GO:0008009;GO:0031727;GO:0031726;GO:000820	BP:chemokine-mediated signaling pathway;BP:positive regulation of natural killer cell chemotaxis;BP:cell chemotaxis;BP:eosinophil chemotaxis;BP:positive regulation of inflammatory response;BP:cellular response to tumor necrosis factor;BP:response to gamma radiation;BP:G-protein coupled receptor signaling pathway;BP:neutrophil chemotaxis;BP:cellular calcium ion homeostasis;BP:regulation of cell sh…	ENSG00000108688	CCL7	C-C motif chemokine ligand 7 [Source:HGNC Symbol;Acc:HGNC:10634]	115.73	1.75
GO:0034351;GO:0043524;GO:0060326;GO:0043200;GO:0050729;GO:0009611;GO:0009612;GO:2000427;GO:0030593;GO:0031100;GO:0014823;GO:0008360;GO:0007179;GO:0031663;GO:0033552;GO:0001912;GO:0009887;GO:0090265;GO:0051770;GO:0043547;GO:0071356;GO:0071354;GO:0044344;GO:0007186;GO:0007187;GO:0032760;GO:0006954;GO:0006955;GO:0048010;GO:0006959;GO:0002523;GO:0036006;GO:0036499;GO:0043491;GO:0071347;GO:0071346;GO:…	BP:negative regulation of glial cell apoptotic process;BP:negative regulation of neuron apoptotic process;BP:cell chemotaxis;BP:response to amino acid;BP:positive regulation of inflammatory response;BP:response to wounding;BP:response to mechanical stimulus;BP:positive regulation of apoptotic cell clearance;BP:neutrophil chemotaxis;BP:animal organ regeneration;BP:response to activity;BP:regulatio…	ENSG00000108691	CCL2	C-C motif chemokine ligand 2 [Source:HGNC Symbol;Acc:HGNC:10618]	3756.47	481.01
GO:0070098;GO:0006955;GO:0006468;GO:0006816;GO:0006954;GO:0006935;GO:0007186;GO:0002548;GO:0006954;GO:0030593;GO:0043547;GO:0048247;GO:0070098;GO:0070374;GO:0071346;GO:0071347;GO:0071356;GO:0006887;GO:0006935;GO:0007165;GO:0009615;GO:0007267;GO:0006874;GO:0060326;GO:0048247;GO:0043085;GO:0050729;GO:0071356;GO:0009615;GO:0006887;GO:0002687;GO:0007186;GO:0070664;GO:0006468;GO:0030593;GO:0006874;GO:…	BP:chemokine-mediated signaling pathway;BP:immune response;BP:protein phosphorylation;BP:calcium ion transport;BP:inflammatory response;BP:chemotaxis;BP:G-protein coupled receptor signaling pathway;BP:monocyte chemotaxis;BP:inflammatory response;BP:neutrophil chemotaxis;BP:positive regulation of GTPase activity;BP:lymphocyte chemotaxis;BP:chemokine-mediated signaling pathway;BP:positive regulatio…	ENSG00000108700	CCL8	C-C motif chemokine ligand 8 [Source:HGNC Symbol;Acc:HGNC:10635]	58.74	0
GO:0002548;GO:0070098;GO:0070374;GO:0030593;GO:0071356;GO:0006874;GO:0071347;GO:0071346;GO:0050729;GO:0051384;GO:0016032;GO:0006955;GO:0060326;GO:0048247;GO:0007186;GO:0090026;GO:0051384;GO:0007204;GO:0006935;GO:0006955;GO:0006935;GO:0007186;GO:0002548;GO:0006954;GO:0030593;GO:0043547;GO:0048247;GO:0070098;GO:0070374;GO:0071346;GO:0071347;GO:0071356;GO:0006935;GO:0007165;GO:0006874;GO:0016032;GO:…	BP:monocyte chemotaxis;BP:chemokine-mediated signaling pathway;BP:positive regulation of ERK1 and ERK2 cascade;BP:neutrophil chemotaxis;BP:cellular response to tumor necrosis factor;BP:cellular calcium ion homeostasis;BP:cellular response to interleukin-1;BP:cellular response to interferon-gamma;BP:positive regulation of inflammatory response;BP:response to glucocorticoid;BP:viral process;BP:immu…	ENSG00000108702	CCL1	C-C motif chemokine ligand 1 [Source:HGNC Symbol;Acc:HGNC:10609]	1.06	0
GO:0039536;GO:0039534;GO:0032480;GO:1900246;GO:1900245;GO:0032481;GO:0045824;GO:0005737;GO:0016817;GO:0004386;GO:0003727;GO:0008270;GO:0005515;GO:0003677;GO:0003725;GO:000552	BP:negative regulation of RIG-I signaling pathway;BP:negative regulation of MDA-5 signaling pathway;BP:negative regulation of type I interferon production;BP:positive regulation of RIG-I signaling pathway;BP:positive regulation of MDA-5 signaling pathway;BP:positive regulation of type I interferon production;BP:negative regulation of innate immune response;CC:cytoplasm;MF:hydrolase activity, acti…	ENSG00000108771	DHX58	DExH-box helicase 58 [Source:HGNC Symbol;Acc:HGNC:29517]	47.92	15.095
GO:0006310;GO:0006281;GO:0072429;GO:0036297;GO:0090305;GO:0005720;GO:0005730;GO:0005654;GO:0048476;GO:0005737;GO:0004518;GO:0004519;GO:0004520;GO:0005515;GO:0003677;GO:004687	BP:DNA recombination;BP:DNA repair;BP:response to intra-S DNA damage checkpoint signaling;BP:interstrand cross-link repair;BP:nucleic acid phosphodiester bond hydrolysis;CC:nuclear heterochromatin;CC:nucleolus;CC:nucleoplasm;CC:Holliday junction resolvase complex;CC:cytoplasm;MF:nuclease activity;MF:endonuclease activity;MF:endodeoxyribonuclease activity;MF:protein binding;MF:DNA binding;MF:metal…	ENSG00000108829	LRRC59	leucine rich repeat containing 59 [Source:HGNC Symbol;Acc:HGNC:28817]	179.3	110.225
GO:0016021;GO:001602	CC:integral component of membrane;CC:membrane;	ENSG00000108932	SLC16A6	solute carrier family 16 member 6 [Source:HGNC Symbol;Acc:HGNC:10927]	0.02	0.29
GO:0000187;GO:0022602;GO:0042493;GO:0018108;GO:0060048;GO:0072709;GO:0051770;GO:0043065;GO:0035897;GO:0006468;GO:0006975;GO:0002931;GO:0007050;GO:0070423;GO:0006355;GO:0032308;GO:0005856;GO:0005654;GO:0005829;GO:0004674;GO:0004713;GO:0005524;GO:0019901;GO:0004702;GO:000470	BP:activation of MAPK activity;BP:ovulation cycle process;BP:response to drug;BP:peptidyl-tyrosine phosphorylation;BP:cardiac muscle contraction;BP:cellular response to sorbitol;BP:positive regulation of nitric-oxide synthase biosynthetic process;BP:positive regulation of apoptotic process;BP:proteolysis in other organism;BP:protein phosphorylation;BP:DNA damage induced protein phosphorylation;BP…	ENSG00000108984	MAP2K6	mitogen-activated protein kinase kinase 6 [Source:HGNC Symbol;Acc:HGNC:6846]	1.185	3.665
GO:0009790;GO:0043161;GO:0051260;GO:0035024;GO:0016567;GO:0006260;GO:0045740;GO:0006955;GO:0016477;GO:0006915;GO:0043149;GO:0031463;GO:0005634;GO:0005730;GO:0005768;GO:0017049;GO:0019904;GO:000484	BP:embryo development;BP:proteasome-mediated ubiquitin-dependent protein catabolic process;BP:protein homooligomerization;BP:negative regulation of Rho protein signal transduction;BP:protein ubiquitination;BP:DNA replication;BP:positive regulation of DNA replication;BP:immune response;BP:cell migration;BP:apoptotic process;BP:stress fiber assembly;CC:Cul3-RING ubiquitin ligase complex;CC:nucleus;…	ENSG00000109079	TNFAIP1	TNF alpha induced protein 1 [Source:HGNC Symbol;Acc:HGNC:11894]	161.275	43.66
GO:0071347;GO:0071222;GO:0090263;GO:0038061;GO:0010744;GO:0007165;GO:0050728;GO:0071375;GO:0000122;GO:0071356;GO:0043066;GO:0071316;GO:0031293;GO:0045944;GO:0071260;GO:0002223;GO:0035994;GO:0050852;GO:0046688;GO:0045083;GO:0032481;GO:0051403;GO:0045893;GO:0038095;GO:0006979;GO:0010956;GO:0051092;GO:0032269;GO:1904630;GO:0071322;GO:0071359;GO:0007249;GO:0032375;GO:0010884;GO:1900127;GO:1990416;GO:…	BP:cellular response to interleukin-1;BP:cellular response to lipopolysaccharide;BP:positive regulation of canonical Wnt signaling pathway;BP:NIK/NF-kappaB signaling;BP:positive regulation of macrophage derived foam cell differentiation;BP:signal transduction;BP:negative regulation of inflammatory response;BP:cellular response to peptide hormone stimulus;BP:negative regulation of transcription fr…	ENSG00000109320	NFKB1	nuclear factor kappa B subunit 1 [Source:HGNC Symbol;Acc:HGNC:7794]	96.94	18.415
GO:000550	MF:calcium ion binding;	ENSG00000109436	TBC1D9	TBC1 domain family member 9 [Source:HGNC Symbol;Acc:HGNC:21710]	27.935	16.14
GO:0046688;GO:0001666;GO:0019430;GO:0055114;GO:0005796;GO:0070062;GO:0005634;GO:0005802;GO:0031012;GO:0005615;GO:0046872;GO:0008270;GO:0005515;GO:0004784;GO:0005507;GO:000820	BP:response to copper ion;BP:response to hypoxia;BP:removal of superoxide radicals;BP:oxidation-reduction process;CC:Golgi lumen;CC:extracellular exosome;CC:nucleus;CC:trans-Golgi network;CC:extracellular matrix;CC:extracellular space;MF:metal ion binding;MF:zinc ion binding;MF:protein binding;MF:superoxide dismutase activity;MF:copper ion binding;MF:heparin binding;	ENSG00000109610	SOD3	superoxide dismutase 3 [Source:HGNC Symbol;Acc:HGNC:11181]	0.325	0.03
GO:0006284;GO:0006289;GO:0090305;GO:0005654;GO:0003697;GO:0000405;GO:0019104;GO:0003906;GO:0008270;GO:0003690;GO:000368	BP:base-excision repair;BP:nucleotide-excision repair;BP:nucleic acid phosphodiester bond hydrolysis;CC:nucleoplasm;MF:single-stranded DNA binding;MF:bubble DNA binding;MF:DNA N-glycosylase activity;MF:DNA;MF:zinc ion binding;MF:double-stranded DNA binding;MF:damaged DNA binding;	ENSG00000109674	NEIL3	nei like DNA glycosylase 3 [Source:HGNC Symbol;Acc:HGNC:24573]	0.87	3.225
GO:0043066;GO:0006412;GO:0070062;GO:0005730;GO:0005840;GO:0005925;GO:0022627;GO:0044822;GO:000373	BP:negative regulation of apoptotic process;BP:translation;CC:extracellular exosome;CC:nucleolus;CC:ribosome;CC:focal adhesion;CC:cytosolic small ribosomal subunit;MF:pol;MF:structural constituent of ribosome;	ENSG00000109686	SH3D19	SH3 domain containing 19 [Source:HGNC Symbol;Acc:HGNC:30418]	4.16	33.63
GO:0043200;GO:0007218;GO:0060012;GO:0007399;GO:1902476;GO:0001964;GO:0005737;GO:0016021;GO:0030425;GO:0045211;GO:0016935;GO:0030054;GO:0016934;GO:001659	BP:response to amino acid;BP:neuropeptide signaling pathway;BP:synaptic transmission, glycinergic;BP:nervous system development;BP:chloride transmembrane transport;BP:startle response;CC:cytoplasm;CC:integral component of membrane;CC:dendrite;CC:postsynaptic membrane;CC:glycine-gated chloride channel complex;CC:cell junction;MF:extracellular-glycine-gated chloride channel activity;MF:glycine bind…	ENSG00000109738	GLRB	glycine receptor beta [Source:HGNC Symbol;Acc:HGNC:4329]	0.515	1.27
GO:0006633;GO:0033490;GO:0033489;GO:0055114;GO:0016021;GO:0005789;GO:0000248;GO:0005506;GO:001649	BP:fatty acid biosynthetic process;BP:cholesterol biosynthetic process via lathosterol;BP:cholesterol biosynthetic process via desmosterol;BP:oxidation-reduction process;CC:integral component of membrane;CC:endoplasmic reticulum membrane;MF:C-5 sterol desaturase activity;MF:iron ion binding;MF:oxidoreductase activity;	ENSG00000109929	SC5D	sterol-C5-desaturase [Source:HGNC Symbol;Acc:HGNC:10547]	3.19	10.375
GO:1990090;GO:0007596;GO:0061512;GO:2001137;GO:0031175;GO:0006886;GO:0051260;GO:0060271;GO:0042632;GO:0006897;GO:0034383;GO:0010886;GO:1901741;GO:0032456;GO:0055038;GO:0030139;GO:0031095;GO:0070062;GO:0043209;GO:0005811;GO:0020018;GO:0048471;GO:0031901;GO:0005622;GO:0005524;GO:0005509;GO:0005525;GO:0005515;GO:001713	BP:cellular response to nerve growth factor stimulus;BP:blood coagulation;BP:protein localization to cilium;BP:positive regulation of endocytic recycling;BP:neuron projection development;BP:intracellular protein transport;BP:protein homooligomerization;BP:cilium assembly;BP:cholesterol homeostasis;BP:endocytosis;BP:low-density lipoprotein particle clearance;BP:positive regulation of cholesterol s…	ENSG00000110047	EHD1	EH domain containing 1 [Source:HGNC Symbol;Acc:HGNC:3242]	79.195	45.575
GO:0034214;GO:0033198;GO:0007267;GO:0002931;GO:0050717;GO:0050718;GO:0070588;GO:0006811;GO:0006810;GO:0006816;GO:0006816;GO:0070588;GO:0007267;GO:0034214;GO:0050718;GO:0006812;GO:0005783;GO:0005789;GO:0005921;GO:0016021;GO:0032059;GO:0005886;GO:0043234;GO:0005886;GO:0005789;GO:0005783;GO:0005783;GO:0016021;GO:0016020;GO:0016020;GO:0005921;GO:0005921;GO:0030054;GO:0005886;GO:0005886;GO:0032059;GO:…	BP:protein hexamerization;BP:response to ATP;BP:cell-cell signaling;BP:response to ischemia;BP:positive regulation of interleukin-1 alpha secretion;BP:positive regulation of interleukin-1 beta secretion;BP:calcium ion transmembrane transport;BP:ion transport;BP:transport;BP:calcium ion transport;BP:calcium ion transport;BP:calcium ion transmembrane transport;BP:cell-cell signaling;BP:protein hexa…	ENSG00000110218	PANX1	pannexin 1 [Source:HGNC Symbol;Acc:HGNC:8599]	14.635	6.55
GO:0006355;GO:0051865;GO:0016020;GO:0008270;GO:0003677;GO:000484	BP:regulation of transcription, DNA-templated;BP:protein autoubiquitination;CC:membrane;MF:zinc ion binding;MF:DNA binding;MF:ubiquitin-protein transferase activity;	ENSG00000110315	RNF141	ring finger protein 141 [Source:HGNC Symbol;Acc:HGNC:21159]	4.24	8.72
GO:0030030;GO:0031122;GO:1905515;GO:0007052;GO:0031122;GO:0007052;GO:0005737;GO:0005813;GO:0005813;GO:0097546;GO:0030496;GO:0097546;GO:000551	BP:cell projection organization;BP:cytoplasmic microtubule organization;BP:non-motile cilium assembly;BP:mitotic spindle organization;BP:cytoplasmic microtubule organization;BP:mitotic spindle organization;CC:cytoplasm;CC:centrosome;CC:centrosome;CC:ciliary base;CC:midbody;CC:ciliary base;MF:protein binding;	ENSG00000110318	CEP126	centrosomal protein 126 [Source:HGNC Symbol;Acc:HGNC:29264]	0.075	0.8
GO:0019221;GO:0032496;GO:0016021;GO:0005886;GO:0004920;GO:001996	BP:cytokine-mediated signaling pathway;BP:response to lipopolysaccharide;CC:integral component of membrane;CC:plasma membrane;MF:interleukin-10 receptor activity;MF:interleukin-10 binding;	ENSG00000110324	IL10RA	interleukin 10 receptor subunit alpha [Source:HGNC Symbol;Acc:HGNC:5964]	0.735	0.28
GO:0006810;GO:0006811;GO:0006810;GO:0016020;GO:0005765;GO:0016021;GO:0005215;GO:0005215;GO:001533	BP:transport;BP:ion transport;BP:transport;CC:membrane;CC:lysosomal membrane;CC:integral component of membrane;MF:transporter activity;MF:transporter activity;MF:peptid;	ENSG00000110446	SLC15A3	solute carrier family 15 member 3 [Source:HGNC Symbol;Acc:HGNC:18068]	114.02	25.565
GO:0035690;GO:0007165;GO:0009897;GO:0016021;GO:0005887;GO:0005515;GO:0030246;GO:0004888;GO:000550	BP:cellular response to drug;BP:signal transduction;CC:external side of plasma membrane;CC:integral component of membrane;CC:integral component of plasma membrane;MF:protein binding;MF:carbohydrate binding;MF:transmembrane signaling receptor activity;MF:calcium ion binding;	ENSG00000110848	CD69	CD69 molecule [Source:HGNC Symbol;Acc:HGNC:1694]	55.82	0.84
GO:0045892;GO:000551	BP:negative regulation of transcription, DNA-templated;MF:protein binding;	ENSG00000110987	BCL7A	BCL tumor suppressor 7A [Source:HGNC Symbol;Acc:HGNC:1004]	0.55	3.105
GO:0006470;GO:0005737;GO:0005634;GO:000472	BP:protein dephosphorylation;CC:cytoplasm;CC:nucleus;MF:protein serine/threonine phosphatase activity;	ENSG00000111110	PPM1H	protein phosphatase, Mg2+/Mn2+ dependent 1H [Source:HGNC Symbol;Acc:HGNC:18583]	0.065	0.425
GO:0006355;GO:0005634;GO:0043565;GO:0003700;GO:000367	BP:regulation of transcription, DNA-templated;CC:nucleus;MF:sequence-specific DNA binding;MF:transcription factor activity, sequence-specific DNA binding;MF:DNA binding;	ENSG00000111145	ELK3	ELK3, ETS transcription factor [Source:HGNC Symbol;Acc:HGNC:3325]	7.585	37.96
GO:0051607;GO:0051607;GO:0050896;GO:0045071;GO:0060700;GO:0002376;GO:0060333;GO:0060337;GO:0005654;GO:0005886;GO:0005829;GO:0005615;GO:0003725;GO:0016740;GO:0003725;GO:0003723;GO:0005515;GO:0001730;GO:000552	BP:defense response to virus;BP:defense response to virus;BP:response to stimulus;BP:negative regulation of viral genome replication;BP:regulation of ribonuclease activity;BP:immune system process;BP:interferon-gamma-mediated signaling pathway;BP:type I interferon signaling pathway;CC:nucleoplasm;CC:plasma membrane;CC:cytosol;CC:extracellular space;MF:double-stranded RNA binding;MF:transferase ac…	ENSG00000111331	OAS3	2'-5'-oligoadenylate synthetase 3 [Source:HGNC Symbol;Acc:HGNC:8088]	135.78	63.615
GO:0051607;GO:0006486;GO:0018377;GO:0006955;GO:0060333;GO:0006164;GO:0006401;GO:0060337;GO:0016020;GO:0005634;GO:0005739;GO:0048471;GO:0005783;GO:0005829;GO:0016779;GO:0003725;GO:0008270;GO:0005515;GO:0001730;GO:000552	BP:defense response to virus;BP:protein glycosylation;BP:protein myristoylation;BP:immune response;BP:interferon-gamma-mediated signaling pathway;BP:purine nucleotide biosynthetic process;BP:RNA catabolic process;BP:type I interferon signaling pathway;CC:membrane;CC:nucleus;CC:mitochondrion;CC:perinuclear region of cytoplasm;CC:endoplasmic reticulum;CC:cytosol;MF:nucleotidyltransferase activity;M…	ENSG00000111335	OAS2	2'-5'-oligoadenylate synthetase 2 [Source:HGNC Symbol;Acc:HGNC:8087]	108.995	72.345
GO:0016311;GO:0043235;GO:0005829;GO:0005739;GO:0008253;GO:004687	BP:dephosphorylation;CC:receptor complex;CC:cytosol;CC:mitochondrion;MF:5'-nucleotidase activity;MF:metal ion binding;	ENSG00000111696	NT5DC3	5'-nucleotidase domain containing 3 [Source:HGNC Symbol;Acc:HGNC:30826]	0.28	0.825
GO:0048227;GO:0031175;GO:0019882;GO:0006888;GO:0007264;GO:0000910;GO:0036010;GO:0032456;GO:0005789;GO:0005622;GO:0010008;GO:0045171;GO:0070062;GO:0005739;GO:0031253;GO:0045334;GO:0000139;GO:0005905;GO:0005546;GO:0005525;GO:0003924;GO:001900	BP:plasma membrane to endosome transport;BP:neuron projection development;BP:antigen processing and presentation;BP:ER to Golgi vesicle-mediated transport;BP:small GTPase mediated signal transduction;BP:cytokinesis;BP:protein localization to endosome;BP:endocytic recycling;CC:endoplasmic reticulum membrane;CC:intracellular;CC:endosome membrane;CC:intercellular bridge;CC:extracellular exosome;CC:m…	ENSG00000111737	RAB35	RAB35, member RAS oncogene family [Source:HGNC Symbol;Acc:HGNC:9774]	74.195	44
GO:0002456;GO:0016021;GO:0005886;GO:0005794;GO:000573	BP:T cell mediated immunity;CC:integral component of membrane;CC:plasma membrane;CC:Golgi apparatus;CC:nucleolus;	ENSG00000111801	BTN3A3	butyrophilin subfamily 3 member A3 [Source:HGNC Symbol;Acc:HGNC:1140]	19.145	8.89
GO:0031936;GO:0006281;GO:0006336;GO:0006335;GO:0006333;GO:0042692;GO:0001649;GO:0043234;GO:0005634;GO:0005654;GO:0000790;GO:0042393;GO:000368	BP:negative regulation of chromatin silencing;BP:DNA repair;BP:DNA replication-independent nucleosome assembly;BP:DNA replication-dependent nucleosome assembly;BP:chromatin assembly or disassembly;BP:muscle cell differentiation;BP:osteoblast differentiation;CC:protein complex;CC:nucleus;CC:nucleoplasm;CC:nuclear chromatin;MF:histone binding;MF:chromatin binding;	ENSG00000111875	ASF1A	anti-silencing function 1A histone chaperone [Source:HGNC Symbol;Acc:HGNC:20995]	2.76	7.93
GO:0045944;GO:0005634;GO:0035257;GO:003037	BP:positive regulation of transcription from RNA polymerase II promoter;CC:nucleus;MF:nuclear hormone receptor binding;MF:ligand-dependent nuclear receptor transcription coactivator activity;	ENSG00000111912	NCOA7	nuclear receptor coactivator 7 [Source:HGNC Symbol;Acc:HGNC:21081]	73.78	17.33
GO:0006281;GO:0006974;GO:0036297;GO:0036297;GO:0005634;GO:0005634;GO:0043240;GO:0005654;GO:0043240;GO:000367	BP:DNA repair;BP:cellular response to DNA damage stimulus;BP:interstrand cross-link repair;BP:interstrand cross-link repair;CC:nucleus;CC:nucleus;CC:Fanconi anaemia nuclear complex;CC:nucleoplasm;CC:Fanconi anaemia nuclear complex;MF:molecular_function;	ENSG00000112039	FANCE	Fanconi anemia complementation group E [Source:HGNC Symbol;Acc:HGNC:3586]	1.105	4.295
GO:0000165;GO:0005622;GO:0004707;GO:000552	BP:MAPK cascade;CC:intracellular;MF:MAP kinase activity;MF:ATP binding;	ENSG00000112062	MAPK14	mitogen-activated protein kinase 14 [Source:HGNC Symbol;Acc:HGNC:6876]	7.01	20.64
GO:0001315;GO:0008285;GO:1902176;GO:0051289;GO:0003069;GO:0032364;GO:0001836;GO:0019430;GO:0006357;GO:0043524;GO:0055114;GO:0070062;GO:0005759;GO:0030145;GO:0004784;GO:0046872;GO:004280	BP:age-dependent response to reactive oxygen species;BP:negative regulation of cell proliferation;BP:negative regulation of oxidative stress-induced intrinsic apoptotic signaling pathway;BP:protein homotetramerization;BP:vasodilation by acetylcholine involved in regulation of systemic arterial blood pressure;BP:oxygen homeostasis;BP:release of cytochrome c from mitochondria;BP:removal of superoxi…	ENSG00000112096	SOD2	superoxide dismutase 2 [Source:HGNC Symbol;Acc:HGNC:11180]	833.835	70.35
GO:0031532;GO:0050790;GO:0043086;GO:0003779;GO:0008157;GO:0004864;GO:000551	BP:actin cytoskeleton reorganization;BP:regulation of catalytic activity;BP:negative regulation of catalytic activity;MF:actin binding;MF:protein phosphatase 1 binding;MF:protein phosphatase inhibitor activity;MF:protein binding;	ENSG00000112137	PHACTR1	phosphatase and actin regulator 1 [Source:HGNC Symbol;Acc:HGNC:20990]	2.25	1.005
GO:0043372;GO:0032743;GO:0006952;GO:0032713;GO:0007165;GO:0006959;GO:0032733;GO:0014070;GO:0009897;GO:0016021;GO:0016021;GO:0016020;GO:000588	BP:positive regulation of CD4-positive, alpha-beta T cell differentiation;BP:positive regulation of interleukin-2 production;BP:defense response;BP:negative regulation of interleukin-4 production;BP:signal transduction;BP:humoral immune response;BP:positive regulation of interleukin-10 production;BP:response to organic cyclic compound;CC:external side of plasma membrane;CC:integral component of m…	ENSG00000112149	CD83	CD83 molecule [Source:HGNC Symbol;Acc:HGNC:1703]	4.48	0.6
GO:0000122;GO:0005634;GO:0001206;GO:000098	BP:negative regulation of transcription from RNA polymerase II promoter;CC:nucleus;MF:transcriptional repressor activity, RNA polymerase II distal enhancer sequence-specific binding;MF:RNA polymerase II distal enhancer sequence-specific DNA binding;	ENSG00000112182	BACH2	BTB domain and CNC homolog 2 [Source:HGNC Symbol;Acc:HGNC:14078]	0.22	0.73
GO:0030154;GO:0050789;GO:0005654;GO:0005829;GO:000372	BP:cell differentiation;BP:regulation of biological process;CC:nucleoplasm;CC:cytosol;MF:RNA binding;	ENSG00000112183	RBM24	RNA binding motif protein 24 [Source:HGNC Symbol;Acc:HGNC:21539]	0.345	0.92
GO:0050790;GO:0006457;GO:0019538;GO:1900034;GO:0050790;GO:1900034;GO:0006457;GO:0019538;GO:0005829;GO:0005829;GO:0051087;GO:0000774;GO:0042802;GO:0005515;GO:0051087;GO:0042802;GO:0005515;GO:0000774;GO:000077	BP:regulation of catalytic activity;BP:protein folding;BP:protein metabolic process;BP:regulation of cellular response to heat;BP:regulation of catalytic activity;BP:regulation of cellular response to heat;BP:protein folding;BP:protein metabolic process;CC:cytosol;CC:cytosol;MF:chaperone binding;MF:adenyl-nucleotide exchange factor activity;MF:identical protein binding;MF:protein binding;MF:chape…	ENSG00000112208	BAG2	BCL2 associated athanogene 2 [Source:HGNC Symbol;Acc:HGNC:938]	0.26	1.09
GO:0006511;GO:0000209;GO:0006511;GO:0043687;GO:0000209;GO:0005829;GO:0000151;GO:0005654;GO:0005739;GO:0016607;GO:0005737;GO:0005634;GO:0005758;GO:0005829;GO:0000151;GO:0005758;GO:0004842;GO:0004842;GO:000484	BP:ubiquitin-dependent protein catabolic process;BP:protein polyubiquitination;BP:ubiquitin-dependent protein catabolic process;BP:post-translational protein modification;BP:protein polyubiquitination;CC:cytosol;CC:ubiquitin ligase complex;CC:nucleoplasm;CC:mitochondrion;CC:nuclear speck;CC:cytoplasm;CC:nucleus;CC:mitochondrial intermembrane space;CC:cytosol;CC:ubiquitin ligase complex;CC:mitocho…	ENSG00000112234	FBXL4	F-box and leucine rich repeat protein 4 [Source:HGNC Symbol;Acc:HGNC:13601]	0.615	2.19
GO:0042552;GO:0019933;GO:0007166;GO:0007186;GO:0016021;GO:0005622;GO:0005886;GO:0004930;GO:0050840;GO:000551	BP:myelination;BP:cAMP-mediated signaling;BP:cell surface receptor signaling pathway;BP:G-protein coupled receptor signaling pathway;CC:integral component of membrane;CC:intracellular;CC:plasma membrane;MF:G-protein coupled receptor activity;MF:extracellular matrix binding;MF:collagen binding;	ENSG00000112414	ADGRG6	adhesion G protein-coupled receptor G6 [Source:HGNC Symbol;Acc:HGNC:13841]	9.795	38.615
GO:0030334;GO:0030155;GO:0050873;GO:0030198;GO:0045995;GO:0001568;GO:0070062;GO:0005605;GO:0005201;GO:000510	BP:regulation of cell migration;BP:regulation of cell adhesion;BP:brown fat cell differentiation;BP:extracellular matrix organization;BP:regulation of embryonic development;BP:blood vessel development;CC:extracellular exosome;CC:basal lamina;MF:extracellular matrix structural constituent;MF:receptor binding;	ENSG00000112769	LAMA4	laminin subunit alpha 4 [Source:HGNC Symbol;Acc:HGNC:6484]	96.675	224.18
GO:0030193;GO:0010468;GO:0044822;GO:000551	BP:regulation of blood coagulation;BP:regulation of gene expression;MF:pol;MF:protein binding;	ENSG00000112773	FAM46A	family with sequence similarity 46 member A [Source:HGNC Symbol;Acc:HGNC:18345]	0.96	0.215
GO:0019677;GO:0006769;GO:0006742;GO:0005777;GO:0005634;GO:0005782;GO:0016787;GO:0000210;GO:0005515;GO:0046872;GO:003552	BP:NAD catabolic process;BP:nicotinamide metabolic process;BP:NADP catabolic process;CC:peroxisome;CC:nucleus;CC:peroxisomal matrix;MF:hydrolase activity;MF:NAD+ diphosphatase activity;MF:protein binding;MF:metal ion binding;MF:NADH pyrophosphatase activity;	ENSG00000112874	NUDT12	nudix hydrolase 12 [Source:HGNC Symbol;Acc:HGNC:18826]	0.615	2.12
GO:0030307;GO:0060326;GO:0018108;GO:0090303;GO:0035313;GO:0038128;GO:0051897;GO:0051545;GO:0007517;GO:0048661;GO:0046854;GO:0051549;GO:0008016;GO:0007173;GO:0014066;GO:0043547;GO:0000165;GO:0016021;GO:0030669;GO:0009986;GO:0005887;GO:0005615;GO:0005088;GO:0008083;GO:0004713;GO:0046934;GO:0005154;GO:000820	BP:positive regulation of cell growth;BP:cell chemotaxis;BP:peptidyl-tyrosine phosphorylation;BP:positive regulation of wound healing;BP:wound healing, spreading of epidermal cells;BP:ERBB2 signaling pathway;BP:positive regulation of protein kinase B signaling;BP:negative regulation of elastin biosynthetic process;BP:muscle organ development;BP:positive regulation of smooth muscle cell proliferat…	ENSG00000113070	HBEGF	heparin binding EGF like growth factor [Source:HGNC Symbol;Acc:HGNC:3059]	3.71	24.66
GO:0015936;GO:0051262;GO:0043407;GO:0008299;GO:0006695;GO:0008542;GO:0055114;GO:0005778;GO:0016021;GO:0005789;GO:0004420;GO:0042282;GO:007040	BP:coenzyme A metabolic process;BP:protein tetramerization;BP:negative regulation of MAP kinase activity;BP:isoprenoid biosynthetic process;BP:cholesterol biosynthetic process;BP:visual learning;BP:oxidation-reduction process;CC:peroxisomal membrane;CC:integral component of membrane;CC:endoplasmic reticulum membrane;MF:hydroxymethylglutaryl-CoA reductas;MF:hydroxymethylglutaryl-CoA reductase acti…	ENSG00000113161	HMGCR	3-hydroxy-3-methylglutaryl-CoA reductase [Source:HGNC Symbol;Acc:HGNC:5006]	6.97	21.27
GO:0005638;GO:0005637;GO:0005654;GO:0016363;GO:0005198;GO:004327	CC:lamin filament;CC:nuclear inner membrane;CC:nucleoplasm;CC:nuclear matrix;MF:structural molecule activity;MF:phospholipase binding;	ENSG00000113368	LMNB1	lamin B1 [Source:HGNC Symbol;Acc:HGNC:6637]	11.555	32.44
GO:0031651;GO:0051443;GO:0044252;GO:0071879;GO:0060613;GO:0043588;GO:0090327;GO:0005764;GO:0005886;GO:0005768;GO:0005769;GO:003169	BP:negative regulation of heat generation;BP:positive regulation of ubiquitin-protein transferase activity;BP:negative regulation of multicellular organismal metabolic process;BP:positive regulation of adrenergic receptor signaling pathway;BP:fat pad development;BP:skin development;BP:negative regulation of locomotion involved in locomotory behavior;CC:lysosome;CC:plasma membrane;CC:endosome;CC:e…	ENSG00000113369	ARRDC3	arrestin domain containing 3 [Source:HGNC Symbol;Acc:HGNC:29263]	2.46	8.56
GO:0071805;GO:0006884;GO:1902476;GO:0007268;GO:0005887;GO:0019901;GO:0015379;GO:002282	BP:potassium ion transmembrane transport;BP:cell volume homeostasis;BP:chloride transmembrane transport;BP:chemical synaptic transmission;CC:integral component of plasma membrane;MF:protein kinase binding;MF:potassiu;MF:potassium ion symporter activity;	ENSG00000113504	SLC12A7	solute carrier family 12 member 7 [Source:HGNC Symbol;Acc:HGNC:10915]	71.065	12.325
GO:0080090;GO:0016233;GO:0090305;GO:0007004;GO:0000722;GO:0000724;GO:0060255;GO:0032508;GO:0007131;GO:0042327;GO:0070192;GO:0006259;GO:0000784;GO:0005634;GO:0030870;GO:0000790;GO:0000794;GO:0035861;GO:0004017;GO:0008408;GO:0043047;GO:0003691;GO:0004003;GO:0000014;GO:005188	BP:regulation of primary metabolic process;BP:telomere capping;BP:nucleic acid phosphodiester bond hydrolysis;BP:telomere maintenance via telomerase;BP:telomere maintenance via recombination;BP:double-strand break repair via homologous recombination;BP:regulation of macromolecule metabolic process;BP:DNA duplex unwinding;BP:reciprocal meiotic recombination;BP:positive regulation of phosphorylatio…	ENSG00000113522	RAD50	RAD50 double strand break repair protein [Source:HGNC Symbol;Acc:HGNC:9816]	1.045	3.89
GO:0006491;GO:0007399;GO:0097503;GO:0001574;GO:0030173;GO:0033691;GO:000382	BP:N-glycan processing;BP:nervous system development;BP:sialylation;BP:ganglioside biosynthetic process;CC:integral component of Golgi membrane;MF:sialic acid binding;MF:alpha-N-acetylneuraminate alpha-2,8-sialyltransferase activity;	ENSG00000113532	ST8SIA4	ST8 alpha-N-acetyl-neuraminide alpha-2,8-sialyltransferase 4 [Source:HGNC Symbol;Acc:HGNC:10871]	0.5	2.68
GO:0036228;GO:0006606;GO:1900034;GO:0019083;GO:0006913;GO:0075733;GO:0000972;GO:0006409;GO:0010827;GO:0031047;GO:0007077;GO:0016925;GO:0006406;GO:0086014;GO:0005643;GO:0031965;GO:0044611;GO:0017056;GO:0005515;GO:000521	BP:protein targeting to nuclear inner membrane;BP:protein import into nucleus;BP:regulation of cellular response to heat;BP:viral transcription;BP:nucleocytoplasmic transport;BP:intracellular transport of virus;BP:transcription-dependent tethering of RNA polymerase II gene DNA at nuclear periphery;BP:tRNA export from nucleus;BP:regulation of glucose transport;BP:gene silencing by RNA;BP:mitotic n…	ENSG00000113569	NUP155	nucleoporin 155 [Source:HGNC Symbol;Acc:HGNC:8063]	2.595	8.45
GO:0032516;GO:0014911;GO:0036120;GO:0018108;GO:0035793;GO:0043406;GO:0055003;GO:0072284;GO:0010863;GO:0072262;GO:0032355;GO:0072075;GO:0043547;GO:0009636;GO:0046777;GO:0043066;GO:0046854;GO:0045840;GO:0007186;GO:0071670;GO:0032526;GO:2000379;GO:0048661;GO:0090280;GO:0042060;GO:0072278;GO:0060981;GO:0043552;GO:0014068;GO:0032956;GO:0043627;GO:0055093;GO:0035441;GO:0061298;GO:0072277;GO:0048839;GO:…	BP:positive regulation of phosphoprotein phosphatase activity;BP:positive regulation of smooth muscle cell migration;BP:cellular response to platelet-derived growth factor stimulus;BP:peptidyl-tyrosine phosphorylation;BP:positive regulation of metanephric mesenchymal cell migration by platelet-derived growth factor receptor-beta signaling pathway;BP:positive regulation of MAP kinase activity;BP:c…	ENSG00000113721	PDGFRB	platelet derived growth factor receptor beta [Source:HGNC Symbol;Acc:HGNC:8804]	1.64	0.6
GO:0006631;GO:0006635;GO:0006475;GO:0055114;GO:0005782;GO:0005777;GO:0005829;GO:0005739;GO:0004165;GO:0019899;GO:0004300;GO:0016508;GO:0005102;GO:000385	BP:fatty acid metabolic process;BP:fatty acid beta-oxidation;BP:internal protein amino acid acetylation;BP:oxidation-reduction process;CC:peroxisomal matrix;CC:peroxisome;CC:cytosol;CC:mitochondrion;MF:dodecenoyl-CoA delta-isomerase activity;MF:enzyme binding;MF:enoyl-CoA hydratase activity;MF:long-chain-enoyl-CoA hydratase activity;MF:receptor binding;MF:3-hydroxyacyl-CoA dehydrogenase activity;	ENSG00000113790	EHHADH	enoyl-CoA hydratase and 3-hydroxyacyl CoA dehydrogenase [Source:HGNC Symbol;Acc:HGNC:3247]	0.54	2.385
GO:0030308;GO:0032764;GO:0030036;GO:0043380;GO:0043087;GO:0045746;GO:0000902;GO:0000122;GO:0030183;GO:0000060;GO:0050727;GO:0043065;GO:0045666;GO:0048821;GO:0035024;GO:0008285;GO:0030890;GO:0051272;GO:0043066;GO:0006974;GO:0048294;GO:0007283;GO:0002467;GO:0031065;GO:0001953;GO:0045629;GO:2000773;GO:0005657;GO:0005634;GO:0031490;GO:0003676;GO:0046872;GO:0001161;GO:0001227;GO:000097	BP:negative regulation of cell growth;BP:negative regulation of mast cell cytokine production;BP:actin cytoskeleton organization;BP:regulation of memory T cell differentiation;BP:regulation of GTPase activity;BP:negative regulation of Notch signaling pathway;BP:cell morphogenesis;BP:negative regulation of transcription from RNA polymerase II promoter;BP:B cell differentiation;BP:protein import in…	ENSG00000113916	BCL6	B-cell CLL/lymphoma 6 [Source:HGNC Symbol;Acc:HGNC:1001]	22.43	3.34
GO:0000002;GO:0051881;GO:0006864;GO:0055085;GO:0006412;GO:0005739;GO:0005743;GO:0016021;GO:0003735;GO:001521	BP:mitochondrial genome maintenance;BP:regulation of mitochondrial membrane potential;BP:pyrimidine nucleotide transport;BP:transmembrane transport;BP:translation;CC:mitochondrion;CC:mitochondrial inner membrane;CC:integral component of membrane;MF:structural constituent of ribosome;MF:pyrimidine nucleotide transmembrane transporter activity;	ENSG00000114120	SLC25A36	solute carrier family 25 member 36 [Source:HGNC Symbol;Acc:HGNC:25554]	3.175	9.265
GO:0071028;GO:0016075;GO:0043488;GO:0071044;GO:0090305;GO:0005794;GO:0045111;GO:0005829;GO:0005886;GO:0005634;GO:0004527;GO:0005515;GO:0003677;GO:004482	BP:nuclear mRNA surveillance;BP:rRNA catabolic process;BP:regulation of mRNA stability;BP:histone mRNA catabolic process;BP:nucleic acid phosphodiester bond hydrolysis;CC:Golgi apparatus;CC:intermediate filament cytoskeleton;CC:cytosol;CC:plasma membrane;CC:nucleus;MF:exonuclease activity;MF:protein binding;MF:DNA binding;MF:pol;	ENSG00000114127	XRN1	5'-3' exoribonuclease 1 [Source:HGNC Symbol;Acc:HGNC:30654]	8.775	4.435
GO:0006355;GO:0005634;GO:0046983;GO:000367	BP:regulation of transcription, DNA-templated;CC:nucleus;MF:protein dimerization activity;MF:DNA binding;	ENSG00000114315	HES1	hes family bHLH transcription factor 1 [Source:HGNC Symbol;Acc:HGNC:5192]	4.065	12.22
GO:0048208;GO:0043123;GO:0070062;GO:0005829;GO:0000139;GO:0005515;GO:000487	BP:COPII vesicle coating;BP:positive regulation of I-kappaB kinase/NF-kappaB signaling;CC:extracellular exosome;CC:cytosol;CC:Golgi membrane;MF:protein binding;MF:signal transducer activity;	ENSG00000114354	TFG	TRK-fused gene [Source:HGNC Symbol;Acc:HGNC:11758]	130.335	73.83
GO:0006469;GO:0046426;GO:0019221;GO:0007205;GO:0046627;GO:0016567;GO:0001558;GO:0035556;GO:0035556;GO:0016567;GO:0040008;GO:0006469;GO:0019221;GO:0046426;GO:0001558;GO:0035556;GO:0009968;GO:0046627;GO:0043687;GO:0005829;GO:0005886;GO:0005622;GO:0005737;GO:0005575;GO:0005829;GO:0004860;GO:0005515;GO:0005515;GO:0003674;GO:000486	BP:negative regulation of protein kinase activity;BP:negative regulation of JAK-STAT cascade;BP:cytokine-mediated signaling pathway;BP:protein kinase C-activating G-protein coupled receptor signaling pathway;BP:negative regulation of insulin receptor signaling pathway;BP:protein ubiquitination;BP:regulation of cell growth;BP:intracellular signal transduction;BP:intracellular signal transduction;B…	ENSG00000114737	CISH	cytokine inducible SH2 containing protein [Source:HGNC Symbol;Acc:HGNC:1984]	13.71	1.825
GO:0045840;GO:0034605;GO:0097192;GO:2000391;GO:0097192;GO:0071639;GO:0070498;GO:0045944;GO:0045766;GO:0045086;GO:0035234;GO:0032755;GO:0010575;GO:0006954;GO:0002248;GO:0006955;GO:0006954;GO:0006954;GO:0010628;GO:0006954;GO:0006915;GO:0008283;GO:0051781;GO:2001240;GO:0019221;GO:0008285;GO:0034605;GO:0045840;GO:0010575;GO:0050715;GO:0001660;GO:0045086;GO:0045766;GO:0046688;GO:0050714;GO:0001660;GO:…	BP:positive regulation of mitotic nuclear division;BP:cellular response to heat;BP:extrinsic apoptotic signaling pathway in absence of ligand;BP:positive regulation of neutrophil extravasation;BP:extrinsic apoptotic signaling pathway in absence of ligand;BP:positive regulation of monocyte chemotactic protein-1 production;BP:interleukin-1-mediated signaling pathway;BP:positive regulation of transc…	ENSG00000115008	IL1A	interleukin 1 alpha [Source:HGNC Symbol;Acc:HGNC:5991]	2.16	0.255
GO:0070098;GO:0048247;GO:2000406;GO:0071356;GO:0071219;GO:0016477;GO:0007186;GO:0030593;GO:0006935;GO:0002548;GO:0006954;GO:0007267;GO:0043547;GO:1901701;GO:0071347;GO:0071346;GO:0002376;GO:0010557;GO:0070374;GO:0050896;GO:0005615;GO:0005576;GO:0005125;GO:0008009;GO:004802	BP:chemokine-mediated signaling pathway;BP:lymphocyte chemotaxis;BP:positive regulation of T cell migration;BP:cellular response to tumor necrosis factor;BP:cellular response to molecule of bacterial origin;BP:cell migration;BP:G-protein coupled receptor signaling pathway;BP:neutrophil chemotaxis;BP:chemotaxis;BP:monocyte chemotaxis;BP:inflammatory response;BP:cell-cell signaling;BP:positive regu…	ENSG00000115009	CCL20	C-C motif chemokine ligand 20 [Source:HGNC Symbol;Acc:HGNC:10619]	5.405	1.005
GO:0009597;GO:0009615;GO:0032728;GO:0032727;GO:0034344;GO:0045087;GO:0032481;GO:0032480;GO:0016925;GO:0039530;GO:0005829;GO:0008270;GO:0000166;GO:1901363;GO:0043167;GO:0043021;GO:0016787;GO:0097159;GO:0016817;GO:0003727;GO:0003725;GO:0003723;GO:000551	BP:detection of virus;BP:response to virus;BP:positive regulation of interferon-beta production;BP:positive regulation of interferon-alpha production;BP:regulation of type III interferon production;BP:innate immune response;BP:positive regulation of type I interferon production;BP:negative regulation of type I interferon production;BP:protein sumoylation;BP:MDA-5 signaling pathway;CC:cytosol;MF:z…	ENSG00000115267	IFIH1	interferon induced with helicase C domain 1 [Source:HGNC Symbol;Acc:HGNC:18873]	64.475	14.56
GO:0009967;GO:0050900;GO:0007165;GO:0005737;GO:0043231;GO:0005829;GO:0005886;GO:0010008;GO:0005070;GO:000551	BP:positive regulation of signal transduction;BP:leukocyte migration;BP:signal transduction;CC:cytoplasm;CC:intracellular membrane-bounded organelle;CC:cytosol;CC:plasma membrane;CC:endosome membrane;MF:SH3/SH2 adaptor activity;MF:protein binding;	ENSG00000115290	GRB14	growth factor receptor bound protein 14 [Source:HGNC Symbol;Acc:HGNC:4565]	0.385	2.18
GO:0009314;GO:0070498;GO:0030728;GO:0070849;GO:0050727;GO:0071333;GO:0071559;GO:0019221;GO:0070498;GO:0010286;GO:0006955;GO:0071731;GO:0030424;GO:0005615;GO:0016021;GO:0009986;GO:0014069;GO:0005887;GO:0043234;GO:0005634;GO:0005161;GO:0002020;GO:0004908;GO:0004909;GO:0035255;GO:000490	BP:response to radiation;BP:interleukin-1-mediated signaling pathway;BP:ovulation;BP:response to epidermal growth factor;BP:regulation of inflammatory response;BP:cellular response to glucose stimulus;BP:response to transforming growth factor beta;BP:cytokine-mediated signaling pathway;BP:interleukin-1-mediated signaling pathway;BP:heat acclimation;BP:immune response;BP:response to nitric oxide;C…	ENSG00000115594	IL1R1	interleukin 1 receptor type 1 [Source:HGNC Symbol;Acc:HGNC:5993]	6.83	3.335
GO:0045063;GO:0042346;GO:0035655;GO:0032729;GO:0030101;GO:0016021;GO:0005886;GO:0004908;GO:0005515;GO:004200	BP:T-helper 1 cell differentiation;BP:positive regulation of NF-kappaB import into nucleus;BP:interleukin-18-mediated signaling pathway;BP:positive regulation of interferon-gamma production;BP:natural killer cell activation;CC:integral component of membrane;CC:plasma membrane;MF:interleukin-1 receptor activity;MF:protein binding;MF:interleukin-18 receptor activity;	ENSG00000115604	IL18R1	interleukin 18 receptor 1 [Source:HGNC Symbol;Acc:HGNC:5988]	17.945	2.92
GO:0006954;GO:0071345;GO:0070301;GO:0007166;GO:0006955;GO:0007165;GO:0016021;GO:0005886;GO:000487	BP:inflammatory response;BP:cellular response to cytokine stimulus;BP:cellular response to hydrogen peroxide;BP:cell surface receptor signaling pathway;BP:immune response;BP:signal transduction;CC:integral component of membrane;CC:plasma membrane;MF:receptor activity;	ENSG00000115607	IL18RAP	interleukin 18 receptor accessory protein [Source:HGNC Symbol;Acc:HGNC:5989]	0.455	0.03
GO:0008104;GO:0001764;GO:0002052;GO:0030177;GO:0030900;GO:0010975;GO:0000226;GO:0065008;GO:0005813;GO:0016020;GO:0005739;GO:0044456;GO:0097546;GO:000551	BP:protein localization;BP:neuron migration;BP:positive regulation of neuroblast proliferation;BP:positive regulation of Wnt signaling pathway;BP:forebrain development;BP:regulation of neuron projection development;BP:microtubule cytoskeleton organization;BP:regulation of biological quality;CC:centrosome;CC:membrane;CC:mitochondrion;CC:synapse part;CC:ciliary base;MF:protein binding;	ENSG00000115641	FHL2	four and a half LIM domains 2 [Source:HGNC Symbol;Acc:HGNC:3703]	63.375	176.705
GO:0016567;GO:0016021;GO:0080008;GO:000573	BP:protein ubiquitination;CC:integral component of membrane;CC:Cul4-RING E3 ubiquitin ligase complex;CC:nucleolus;	ENSG00000115827	DCAF17	DDB1 and CUL4 associated factor 17 [Source:HGNC Symbol;Acc:HGNC:25784]	1.175	3.77
GO:0000122;GO:0006270;GO:0000082;GO:0006260;GO:0000792;GO:0016020;GO:0000808;GO:0005813;GO:0005634;GO:0000939;GO:0005664;GO:0005654;GO:0000784;GO:0003688;GO:000551	BP:negative regulation of transcription from RNA polymerase II promoter;BP:DNA replication initiation;BP:G1/S transition of mitotic cell cycle;BP:DNA replication;CC:heterochromatin;CC:membrane;CC:origin recognition complex;CC:centrosome;CC:nucleus;CC:condensed chromosome inner kinetochore;CC:nuclear origin of replication recognition complex;CC:nucleoplasm;CC:nuclear chromosome, telomeric region;M…	ENSG00000115942	ORC2	origin recognition complex subunit 2 [Source:HGNC Symbol;Acc:HGNC:8488]	1.835	5.535
GO:0006298;GO:0009411;GO:0045830;GO:0045910;GO:0008340;GO:0007131;GO:0043570;GO:0051096;GO:0008630;GO:0000710;GO:0016032;GO:0016446;GO:0005654;GO:0005794;GO:0000790;GO:0005886;GO:0032301;GO:0035064;GO:0032142;GO:0032143;GO:0030983;GO:0016887;GO:0032357;GO:0000287;GO:0032137;GO:0032405;GO:0042803;GO:0043531;GO:0000400;GO:0005524;GO:000368	BP:mismatch repair;BP:response to UV;BP:positive regulation of isotype switching;BP:negative regulation of DNA recombination;BP:determination of adult lifespan;BP:reciprocal meiotic recombination;BP:maintenance of DNA repeat elements;BP:positive regulation of helicase activity;BP:intrinsic apoptotic signaling pathway in response to DNA damage;BP:meiotic mismatch repair;BP:viral process;BP:somatic…	ENSG00000116062	MSH6	mutS homolog 6 [Source:HGNC Symbol;Acc:HGNC:7329]	2.795	10.865
GO:0007169;GO:0070062;GO:0005615;GO:000510	BP:transmembrane receptor protein tyrosine kinase signaling pathway;CC:extracellular exosome;CC:extracellular space;MF:receptor binding;	ENSG00000116194	ANGPTL1	angiopoietin like 1 [Source:HGNC Symbol;Acc:HGNC:489]	0.235	1.15
GO:0031953;GO:0032966;GO:0032869;GO:0060426;GO:0043547;GO:0042536;GO:0036120;GO:0071474;GO:0032691;GO:1903243;GO:0043589;GO:0061469;GO:0060428;GO:0007175;GO:0071549;GO:0071364;GO:0048286;GO:0045616;GO:0070373;GO:0005737;GO:0031234;GO:0005829;GO:0005634;GO:0017124;GO:0031267;GO:0005096;GO:001990	BP:negative regulation of protein autophosphorylation;BP:negative regulation of collagen biosynthetic process;BP:cellular response to insulin stimulus;BP:lung vasculature development;BP:positive regulation of GTPase activity;BP:negative regulation of tumor necrosis factor biosynthetic process;BP:cellular response to platelet-derived growth factor stimulus;BP:cellular hyperosmotic response;BP:nega…	ENSG00000116285	ERRFI1	ERBB receptor feedback inhibitor 1 [Source:HGNC Symbol;Acc:HGNC:18185]	3.995	13.82
GO:0032436;GO:0016567;GO:0016567;GO:0002376;GO:0002250;GO:0000209;GO:0042787;GO:0000209;GO:0032436;GO:0042787;GO:0000209;GO:0002250;GO:0005737;GO:0016021;GO:0005829;GO:0044194;GO:0000151;GO:0005829;GO:0016021;GO:0016020;GO:0000151;GO:0005829;GO:0044194;GO:0031624;GO:0061630;GO:0005515;GO:0004842;GO:0016740;GO:0046872;GO:0008270;GO:0061630;GO:0004842;GO:0004842;GO:0031624;GO:0008270;GO:001687	BP:positive regulation of proteasomal ubiquitin-dependent protein catabolic process;BP:protein ubiquitination;BP:protein ubiquitination;BP:immune system process;BP:adaptive immune response;BP:protein polyubiquitination;BP:protein ubiquitination involved in ubiquitin-dependent protein catabolic process;BP:protein polyubiquitination;BP:positive regulation of proteasomal ubiquitin-dependent protein …	ENSG00000116514	RNF19B	ring finger protein 19B [Source:HGNC Symbol;Acc:HGNC:26886]	96.07	13.095
GO:0006986;GO:0000077;GO:0006281;GO:0031146;GO:0016567;GO:0006516;GO:0030433;GO:0000209;GO:0005829;GO:0044322;GO:0019005;GO:0001948;GO:0030246;GO:006163	BP:response to unfolded protein;BP:DNA damage checkpoint;BP:DNA repair;BP:SCF-dependent proteasomal ubiquitin-dependent protein catabolic process;BP:protein ubiquitination;BP:glycoprotein catabolic process;BP:ER-associated ubiquitin-dependent protein catabolic process;BP:protein polyubiquitination;CC:cytosol;CC:endoplasmic reticulum quality control compartment;CC:SCF ubiquitin ligase complex;MF:g…	ENSG00000116663	FBXO6	F-box protein 6 [Source:HGNC Symbol;Acc:HGNC:13585]	28.665	6.965
GO:0009615;GO:2001243;GO:0006383;GO:0008380;GO:0005737;GO:0015629;GO:0005634;GO:0005654;GO:0005667;GO:000568	BP:response to virus;BP:negative regulation of intrinsic apoptotic signaling pathway;BP:transcription from RNA polymerase III promoter;BP:RNA splicing;CC:cytoplasm;CC:actin cytoskeleton;CC:nucleus;CC:nucleoplasm;CC:transcription factor complex;CC:spliceosomal complex;	ENSG00000116679	IVNS1ABP	influenza virus NS1A binding protein [Source:HGNC Symbol;Acc:HGNC:16951]	6.475	17.46
GO:0010972;GO:0044763;GO:0048523;GO:0030336;GO:000551	BP:negative regulation of G2/M transition of mitotic cell cycle;BP:single-organism cellular process;BP:negative regulation of cellular process;BP:negative regulation of cell migration;MF:protein binding;	ENSG00000116691	MIIP	migration and invasion inhibitory protein [Source:HGNC Symbol;Acc:HGNC:25715]	25.25	16.43
GO:0000185;GO:0000086;GO:0071260;GO:2000379;GO:0043065;GO:0071479;GO:0006469;GO:1900745;GO:0006281;GO:0006950;GO:0006977;GO:0071850;GO:0042770;GO:0051726;GO:0000079;GO:0046330;GO:0007098;GO:0005737;GO:0005634;GO:0005654;GO:0001047;GO:000551	BP:activation of MAPKKK activity;BP:G2/M transition of mitotic cell cycle;BP:cellular response to mechanical stimulus;BP:positive regulation of reactive oxygen species metabolic process;BP:positive regulation of apoptotic process;BP:cellular response to ionizing radiation;BP:negative regulation of protein kinase activity;BP:positive regulation of p38MAPK cascade;BP:DNA repair;BP:response to stres…	ENSG00000116717	GADD45A	growth arrest and DNA damage inducible alpha [Source:HGNC Symbol;Acc:HGNC:4095]	5.64	48.045
GO:0044707;GO:0009968;GO:0009966;GO:0050790;GO:0008277;GO:0003012;GO:0090257;GO:0048519;GO:0005737;GO:0044464;GO:0005634;GO:0005886;GO:0044424;GO:0005096;GO:0001965;GO:000551	BP:single-multicellular organism process;BP:negative regulation of signal transduction;BP:regulation of signal transduction;BP:regulation of catalytic activity;BP:regulation of G-protein coupled receptor protein signaling pathway;BP:muscle system process;BP:regulation of muscle system process;BP:negative regulation of biological process;CC:cytoplasm;CC:cell part;CC:nucleus;CC:plasma membrane;CC:i…	ENSG00000116741	RGS2	regulator of G protein signaling 2 [Source:HGNC Symbol;Acc:HGNC:9998]	13.485	3.655
GO:0055114;GO:0051289;GO:0007601;GO:0042178;GO:0055114;GO:0070062;GO:0005829;GO:0016491;GO:0008270;GO:0003960;GO:0070404;GO:0003730;GO:0070402;GO:000827	BP:oxidation-reduction process;BP:protein homotetramerization;BP:visual perception;BP:xenobiotic catabolic process;BP:oxidation-reduction process;CC:extracellular exosome;CC:cytosol;MF:oxidoreductase activity;MF:zinc ion binding;MF:NADP;MF:NADH binding;MF:mRNA 3'-UTR binding;MF:NADPH binding;MF:zinc ion binding;	ENSG00000116791	CRYZ	crystallin zeta [Source:HGNC Symbol;Acc:HGNC:2419]	2.74	6.935
GO:0046872;GO:000367	MF:metal ion binding;MF:nucleic acid binding;	ENSG00000116809	ZBTB17	zinc finger and BTB domain containing 17 [Source:HGNC Symbol;Acc:HGNC:12936]	33.655	20.485
GO:0042592;GO:0009790;GO:0044699;GO:0009755;GO:0045070;GO:0006367;GO:0006366;GO:0009888;GO:0050794;GO:0045893;GO:0006351;GO:0005634;GO:0005654;GO:0005737;GO:0005488;GO:0004871;GO:0003677;GO:0005543;GO:0004879;GO:0000981;GO:0000977;GO:0003705;GO:0000976;GO:000551	BP:homeostatic process;BP:embryo development;BP:single-organism process;BP:hormone-mediated signaling pathway;BP:positive regulation of viral genome replication;BP:transcription initiation from RNA polymerase II promoter;BP:transcription from RNA polymerase II promoter;BP:tissue development;BP:regulation of cellular process;BP:positive regulation of transcription, DNA-templated;BP:transcription, …	ENSG00000116833	NR5A2	nuclear receptor subfamily 5 group A member 2 [Source:HGNC Symbol;Acc:HGNC:7984]	0.035	0.43
GO:0071451;GO:0071451;GO:0005739;GO:0005654;GO:0005759;GO:0005739;GO:0005737;GO:0005634;GO:0016604;GO:0005739;GO:0005654;GO:0005737;GO:0005634;GO:0005759;GO:0005759;GO:0004649;GO:0016787;GO:0046872;GO:0016787;GO:0046872;GO:0004649;GO:000464	BP:cellular response to superoxide;BP:cellular response to superoxide;CC:mitochondrion;CC:nucleoplasm;CC:mitochondrial matrix;CC:mitochondrion;CC:cytoplasm;CC:nucleus;CC:nuclear body;CC:mitochondrion;CC:nucleoplasm;CC:cytoplasm;CC:nucleus;CC:mitochondrial matrix;CC:mitochondrial matrix;MF:pol;MF:hydrolase activity;MF:metal ion binding;MF:hydrolase activity;MF:metal ion binding;MF:pol;MF:pol;	ENSG00000116863	ADPRHL2	ADP-ribosylhydrolase like 2 [Source:HGNC Symbol;Acc:HGNC:21304]	97.605	37.22
GO:0000226;GO:0015630;GO:001563	BP:microtubule cytoskeleton organization;CC:microtubule cytoskeleton;CC:microtubule cytoskeleton;	ENSG00000116871	MAP7D1	MAP7 domain containing 1 [Source:HGNC Symbol;Acc:HGNC:25514]	182.04	109.895
GO:0030154;GO:0007283;GO:0031047;GO:0015031;GO:0007275;GO:0005794;GO:0005829;GO:0005634;GO:0005737;GO:0048471;GO:0008565;GO:0043565;GO:0044822;GO:0005515;GO:004687	BP:cell differentiation;BP:spermatogenesis;BP:gene silencing by RNA;BP:protein transport;BP:multicellular organism development;CC:Golgi apparatus;CC:cytosol;CC:nucleus;CC:cytoplasm;CC:perinuclear region of cytoplasm;MF:protein transporter activity;MF:sequence-specific DNA binding;MF:pol;MF:protein binding;MF:metal ion binding;	ENSG00000116918	TSNAX	translin associated factor X [Source:HGNC Symbol;Acc:HGNC:12380]	3.575	7.925
GO:0071230;GO:0032008;GO:0034198;GO:0010506;GO:0034448;GO:0005634;GO:1990131;GO:0005764;GO:0003924;GO:0019003;GO:0046982;GO:000552	BP:cellular response to amino acid stimulus;BP:positive regulation of TOR signaling;BP:cellular response to amino acid starvation;BP:regulation of autophagy;CC:EGO complex;CC:nucleus;CC:Gtr1-Gtr2 GTPase complex;CC:lysosome;MF:GTPase activity;MF:GDP binding;MF:protein heterodimerization activity;MF:GTP binding;	ENSG00000116954	RRAGC	Ras related GTP binding C [Source:HGNC Symbol;Acc:HGNC:19902]	25.85	15.94
GO:0006355;GO:0050794;GO:0005634;GO:0005634;GO:0005634;GO:0003700;GO:000367	BP:regulation of transcription, DNA-templated;BP:regulation of cellular process;CC:nucleus;CC:nucleus;CC:nucleus;MF:transcription factor activity, sequence-specific DNA binding;MF:DNA binding;	ENSG00000116990	MYCL	MYCL proto-oncogene, bHLH transcription factor [Source:HGNC Symbol;Acc:HGNC:7555]	0.11	1.525
GO:0007166;GO:0007186;GO:0016021;GO:0016020;GO:0004930;GO:0030246;GO:001652	BP:cell surface receptor signaling pathway;BP:G-protein coupled receptor signaling pathway;CC:integral component of membrane;CC:membrane;MF:G-protein coupled receptor activity;MF:carbohydrate binding;MF:latrotoxin receptor activity;	ENSG00000117114	ADGRL2	adhesion G protein-coupled receptor L2 [Source:HGNC Symbol;Acc:HGNC:18582]	5.57	24.47
GO:0043547;GO:0000188;GO:0045744;GO:0005737;GO:0043234;GO:0005634;GO:0005886;GO:0005829;GO:0005096;GO:0001965;GO:000551	BP:positive regulation of GTPase activity;BP:inactivation of MAPK activity;BP:negative regulation of G-protein coupled receptor protein signaling pathway;CC:cytoplasm;CC:protein complex;CC:nucleus;CC:plasma membrane;CC:cytosol;MF:GTPase activator activity;MF:G-protein alpha-subunit binding;MF:calmodulin binding;	ENSG00000117152	RGS4	regulator of G protein signaling 4 [Source:HGNC Symbol;Acc:HGNC:10000]	3.03	12.555
GO:0044444;GO:0003924;GO:0005525;GO:000551	CC:cytoplasmic part;MF:GTPase activity;MF:GTP binding;MF:protein binding;	ENSG00000117226	GBP3	guanylate binding protein 3 [Source:HGNC Symbol;Acc:HGNC:4184]	24.81	8.4
GO:1903077;GO:0051607;GO:1900025;GO:0050860;GO:0060333;GO:1900041;GO:0070373;GO:0050848;GO:0005829;GO:0000139;GO:0005576;GO:0005886;GO:0019955;GO:0051879;GO:0003924;GO:0019899;GO:0003779;GO:0005525;GO:0042802;GO:003050	BP:negative regulation of protein localization to plasma membrane;BP:defense response to virus;BP:negative regulation of substrate adhesion-dependent cell spreading;BP:negative regulation of T cell receptor signaling pathway;BP:interferon-gamma-mediated signaling pathway;BP:negative regulation of interleukin-2 secretion;BP:negative regulation of ERK1 and ERK2 cascade;BP:regulation of calcium-medi…	ENSG00000117228	GBP1	guanylate binding protein 1 [Source:HGNC Symbol;Acc:HGNC:4182]	818.605	37.215
GO:0008104;GO:0030030;GO:0006810;GO:0007018;GO:0022008;GO:0005829;GO:0044441;GO:0005871;GO:0008574;GO:000016	BP:protein localization;BP:cell projection organization;BP:transport;BP:microtubule-based movement;BP:neurogenesis;CC:cytosol;CC:ciliary part;CC:kinesin complex;MF:ATP-dependent microtubule motor activity, plus-end-directed;MF:nucleotide binding;	ENSG00000117245	KIF17	kinesin family member 17 [Source:HGNC Symbol;Acc:HGNC:19167]	9.44	1.04
GO:0044424;GO:000548	CC:intracellular part;MF:binding;	ENSG00000117318	ID3	inhibitor of DNA binding 3, HLH protein [Source:HGNC Symbol;Acc:HGNC:5362]	385.295	247.35
GO:0048856;GO:0044767;GO:0044763;GO:0007165;GO:0016021;GO:0016020;GO:0097108;GO:000511	BP:anatomical structure development;BP:single-organism developmental process;BP:single-organism cellular process;BP:signal transduction;CC:integral component of membrane;CC:membrane;MF:hedgehog family protein binding;MF:smoothened binding;	ENSG00000117425	PTCH2	patched 2 [Source:HGNC Symbol;Acc:HGNC:9586]	0.08	0.805
GO:0019221;GO:0014911;GO:0007596;GO:0050927;GO:0009612;GO:0055098;GO:0032496;GO:0051897;GO:0007598;GO:0032355;GO:0010641;GO:0045766;GO:0006919;GO:0070301;GO:0009266;GO:0007568;GO:0002541;GO:0002543;GO:0001938;GO:0034405;GO:0031012;GO:0005737;GO:0005886;GO:0005615;GO:0016021;GO:0009986;GO:0031233;GO:0070062;GO:0005543;GO:0002020;GO:000489	BP:cytokine-mediated signaling pathway;BP:positive regulation of smooth muscle cell migration;BP:blood coagulation;BP:positive regulation of positive chemotaxis;BP:response to mechanical stimulus;BP:response to low-density lipoprotein particle;BP:response to lipopolysaccharide;BP:positive regulation of protein kinase B signaling;BP:blood coagulation, extrinsic pathway;BP:response to estradiol;BP:…	ENSG00000117525	F3	coagulation factor III, tissue factor [Source:HGNC Symbol;Acc:HGNC:3541]	20.64	0.525
GO:0043616;GO:0008285;GO:0030216;GO:0060333;GO:0048468;GO:0007050;GO:0006355;GO:0045893;GO:0060644;GO:0060337;GO:0070062;GO:0005829;GO:0005737;GO:0005634;GO:0003700;GO:0005515;GO:000097	BP:keratinocyte proliferation;BP:negative regulation of cell proliferation;BP:keratinocyte differentiation;BP:interferon-gamma-mediated signaling pathway;BP:cell development;BP:cell cycle arrest;BP:regulation of transcription, DNA-templated;BP:positive regulation of transcription, DNA-templated;BP:mammary gland epithelial cell differentiation;BP:type I interferon signaling pathway;CC:extracellula…	ENSG00000117595	IRF6	interferon regulatory factor 6 [Source:HGNC Symbol;Acc:HGNC:6121]	11.85	36.905
GO:0000462;GO:0007275;GO:0032040;GO:0005730;GO:0005654;GO:0005634;GO:0005634;GO:0005634;GO:0044822;GO:0019843;GO:0005515;GO:003451	BP:maturation of SSU-rRNA from tricistronic rRNA transcrip;BP:multicellular organism development;CC:small-subunit processome;CC:nucleolus;CC:nucleoplasm;CC:nucleus;CC:nucleus;CC:nucleus;MF:pol;MF:rRNA binding;MF:protein binding;MF:U3 snoRNA binding;	ENSG00000117597	DIEXF	digestive organ expansion factor homolog (zebrafish) [Source:HGNC Symbol;Acc:HGNC:28440]	0.845	3.265
GO:0001709;GO:0030324;GO:0055010;GO:0030240;GO:0045071;GO:0030910;GO:0060421;GO:2000979;GO:0021707;GO:0046619;GO:0031667;GO:0043049;GO:0000122;GO:0001822;GO:0001946;GO:0045737;GO:2000179;GO:0008285;GO:0060059;GO:0070309;GO:0021915;GO:0055005;GO:0055009;GO:0021542;GO:0061114;GO:0042752;GO:0060214;GO:0090425;GO:0048845;GO:0043433;GO:0097150;GO:0060298;GO:0048839;GO:0010595;GO:0072574;GO:0006355;GO:…	BP:cell fate determination;BP:lung development;BP:ventricular cardiac muscle tissue morphogenesis;BP:skeletal muscle thin filament assembly;BP:negative regulation of viral genome replication;BP:olfactory placode formation;BP:positive regulation of heart growth;BP:positive regulation of forebrain neuron differentiation;BP:cerebellar granule cell differentiation;BP:optic placode formation involved …	ENSG00000117707	PROX1	prospero homeobox 1 [Source:HGNC Symbol;Acc:HGNC:9459]	0.675	0.35
GO:0034446;GO:0007018;GO:0030155;GO:0021772;GO:0032147;GO:0007019;GO:0021766;GO:0043524;GO:0021987;GO:0030705;GO:1903429;GO:0007080;GO:0032467;GO:0033624;GO:0021693;GO:0008284;GO:0030334;GO:0007018;GO:0021987;GO:0008284;GO:0008284;GO:0007018;GO:0001558;GO:0043524;GO:0043066;GO:0043161;GO:0021693;GO:0032467;GO:0007080;GO:0030155;GO:0031641;GO:0032147;GO:0021846;GO:0045184;GO:0031146;GO:0010389;GO:…	BP:substrate adhesion-dependent cell spreading;BP:microtubule-based movement;BP:regulation of cell adhesion;BP:olfactory bulb development;BP:activation of protein kinase activity;BP:microtubule depolymerization;BP:hippocampus development;BP:negative regulation of neuron apoptotic process;BP:cerebral cortex development;BP:cytoskeleton-dependent intracellular transport;BP:regulation of cell maturat…	ENSG00000118193	KIF14	kinesin family member 14 [Source:HGNC Symbol;Acc:HGNC:19181]	0.345	1.175
GO:0005975;GO:0006486;GO:0018146;GO:0005975;GO:0016021;GO:0032580;GO:0016757;GO:0016757;GO:0003831;GO:004687	BP:carbohydrate metabolic process;BP:protein glycosylation;BP:keratan sulfate biosynthetic process;BP:carbohydrate metabolic process;CC:integral component of membrane;CC:Golgi cisterna membrane;MF:transferase activity, transferring glycosyl groups;MF:transferase activity, transferring glycosyl groups;MF:beta-N-acetylglucosaminylglycopeptide beta-1,4-galactosyltransferase activity;MF:metal ion bin…	ENSG00000118276	B4GALT6	beta-1,4-galactosyltransferase 6 [Source:HGNC Symbol;Acc:HGNC:929]	0.92	2.835
GO:0005856;GO:000573	CC:cytoskeleton;CC:cytoplasm;	ENSG00000118407	FILIP1	filamin A interacting protein 1 [Source:HGNC Symbol;Acc:HGNC:21015]	1.075	7.66
GO:0008625;GO:0006919;GO:0036337;GO:1903507;GO:0006355;GO:0071260;GO:0007049;GO:0016605;GO:0005739;GO:0008656;GO:0032184;GO:0003714;GO:0003677;GO:000512	BP:extrinsic apoptotic signaling pathway via death domain receptors;BP:activation of cysteine-type endopeptidase activity involved in apoptotic process;BP:Fas signaling pathway;BP:negative regulation of nucleic acid-templated transcription;BP:regulation of transcription, DNA-templated;BP:cellular response to mechanical stimulus;BP:cell cycle;CC:PML body;CC:mitochondrion;MF:cysteine-type endopepti…	ENSG00000118412	CASP8AP2	caspase 8 associated protein 2 [Source:HGNC Symbol;Acc:HGNC:1510]	0.88	2.545
GO:0070318;GO:0030324;GO:0034059;GO:0050867;GO:0051385;GO:0070278;GO:0007160;GO:0010629;GO:0001503;GO:0010628;GO:0032967;GO:0008544;GO:0008543;GO:0043434;GO:0043200;GO:0032355;GO:0001525;GO:0051496;GO:0009611;GO:0007229;GO:0032330;GO:0070542;GO:0006367;GO:0043280;GO:0016477;GO:0072593;GO:0070542;GO:0070318;GO:0070278;GO:0061448;GO:0060548;GO:0060452;GO:0060401;GO:0051385;GO:0050867;GO:0043434;GO:…	BP:positive regulation of G0 to G1 transition;BP:lung development;BP:response to anoxia;BP:positive regulation of cell activation;BP:response to mineralocorticoid;BP:extracellular matrix constituent secretion;BP:cell-matrix adhesion;BP:negative regulation of gene expression;BP:ossification;BP:positive regulation of gene expression;BP:positive regulation of collagen biosynthetic process;BP:epiderm…	ENSG00000118523	CTGF	connective tissue growth factor [Source:HGNC Symbol;Acc:HGNC:2500]	779.475	2148.62
GO:0038092;GO:0000122;GO:0006355;GO:0045666;GO:0060041;GO:0010470;GO:0006355;GO:0005634;GO:0005654;GO:0005654;GO:0005634;GO:0003700;GO:0003677;GO:0003677;GO:000367	BP:nodal signaling pathway;BP:negative regulation of transcription from RNA polymerase II promoter;BP:regulation of transcription, DNA-templated;BP:positive regulation of neuron differentiation;BP:retina development in camera-type eye;BP:regulation of gastrulation;BP:regulation of transcription, DNA-templated;CC:nucleus;CC:nucleoplasm;CC:nucleoplasm;CC:nucleus;MF:transcription factor activity, se…	ENSG00000118707	TGIF2	TGFB induced factor homeobox 2 [Source:HGNC Symbol;Acc:HGNC:15764]	15.23	9.285
GO:0042127;GO:0021510;GO:0072177;GO:0045429;GO:0072284;GO:0060674;GO:0072075;GO:0072208;GO:2000134;GO:0071805;GO:0050982;GO:0030814;GO:0071470;GO:0035725;GO:0001947;GO:0071158;GO:0008285;GO:0021915;GO:0051298;GO:0061441;GO:0034614;GO:0071498;GO:0035502;GO:0031587;GO:0060315;GO:0003127;GO:0001658;GO:0060078;GO:0042994;GO:0001892;GO:0072218;GO:0072219;GO:0071910;GO:0072235;GO:0072214;GO:0071464;GO:…	BP:regulation of cell proliferation;BP:spinal cord development;BP:mesonephric duct development;BP:positive regulation of nitric oxide biosynthetic process;BP:metanephric S-shaped body morphogenesis;BP:placenta blood vessel development;BP:metanephric mesenchyme development;BP:metanephric smooth muscle tissue development;BP:negative regulation of G1/S transition of mitotic cell cycle;BP:potassium i…	ENSG00000118762	PKD2	polycystin 2, transient receptor potential cation channel [Source:HGNC Symbol;Acc:HGNC:9009]	2.425	10.255
GO:0042908;GO:0071549;GO:0006879;GO:0055085;GO:0006855;GO:0055085;GO:0051593;GO:0010039;GO:0046618;GO:0060136;GO:0015886;GO:0046415;GO:0016324;GO:0016021;GO:0016021;GO:0031966;GO:0005634;GO:0015232;GO:0008559;GO:0042626;GO:0005524;GO:0042626;GO:0005524;GO:004280	BP:xenobiotic transport;BP:cellular response to dexamethasone stimulus;BP:cellular iron ion homeostasis;BP:transmembrane transport;BP:drug transmembrane transport;BP:transmembrane transport;BP:response to folic acid;BP:response to iron ion;BP:drug export;BP:embryonic process involved in female pregnancy;BP:heme transport;BP:urate metabolic process;CC:apical plasma membrane;CC:integral component o…	ENSG00000118777	ABCG2	ATP binding cassette subfamily G member 2 (Junior blood group) [Source:HGNC Symbol;Acc:HGNC:74]	0.375	2.35
GO:0007155;GO:0007156;GO:0005886;GO:0016021;GO:0005886;GO:000550	BP:cell adhesion;BP:homophilic cell adhesion via plasma membrane adhesion molecules;CC:plasma membrane;CC:integral component of membrane;CC:plasma membrane;MF:calcium ion binding;	ENSG00000118946	PCDH17	protocadherin 17 [Source:HGNC Symbol;Acc:HGNC:14267]	3.63	0.675
GO:0006355;GO:0006368;GO:0042795;GO:0006414;GO:0005737;GO:0008023;GO:0005813;GO:000374	BP:regulation of transcription, DNA-templated;BP:transcription elongation from RNA polymerase II promoter;BP:snRNA transcription from RNA polymerase II promoter;BP:translational elongation;CC:cytoplasm;CC:transcription elongation factor complex;CC:centrosome;MF:translation elongation factor activity;	ENSG00000118985	ELL2	elongation factor for RNA polymerase II 2 [Source:HGNC Symbol;Acc:HGNC:17064]	21.82	8.915
GO:0007155;GO:0007266;GO:0005856;GO:0005829;GO:0005886;GO:0051015;GO:004529	BP:cell adhesion;BP:Rho protein signal transduction;CC:cytoskeleton;CC:cytosol;CC:plasma membrane;MF:actin filament binding;MF:cadherin binding;	ENSG00000119326	CTNNAL1	catenin alpha like 1 [Source:HGNC Symbol;Acc:HGNC:2512]	18.12	55.505
GO:0000278;GO:0000086;GO:0018108;GO:0051301;GO:0005813;GO:0005829;GO:0016020;GO:0004713;GO:000551	BP:mitotic cell cycle;BP:G2/M transition of mitotic cell cycle;BP:peptidyl-tyrosine phosphorylation;BP:cell division;CC:centrosome;CC:cytosol;CC:membrane;MF:protein tyrosine kinase activity;MF:protein binding;	ENSG00000119397	CNTRL	centriolin [Source:HGNC Symbol;Acc:HGNC:1858]	0.64	3.855
GO:0030148;GO:0055114;GO:0006666;GO:0005615;GO:0016021;GO:0016020;GO:0005789;GO:0005783;GO:004756	BP:sphingolipid biosynthetic process;BP:oxidation-reduction process;BP:3-keto-sphinganine metabolic process;CC:extracellular space;CC:integral component of membrane;CC:membrane;CC:endoplasmic reticulum membrane;CC:endoplasmic reticulum;MF:3-dehydrosphinganine reductase activity;	ENSG00000119537	KDSR	3-ketodihydrosphingosine reductase [Source:HGNC Symbol;Acc:HGNC:4021]	34.34	13.79
GO:0031100;GO:0007565;GO:0030154;GO:0042493;GO:0032870;GO:0045766;GO:0001938;GO:0051781;GO:0007275;GO:0030154;GO:0008284;GO:0007165;GO:0007267;GO:0048010;GO:0001525;GO:0051781;GO:0001525;GO:0001666;GO:0001938;GO:0008284;GO:0045766;GO:0048010;GO:0050930;GO:0060754;GO:0007267;GO:0060688;GO:0001658;GO:0048010;GO:0001666;GO:0002040;GO:0016020;GO:0005615;GO:0005576;GO:0016020;GO:0005615;GO:0005576;GO:…	BP:animal organ regeneration;BP:female pregnancy;BP:cell differentiation;BP:response to drug;BP:cellular response to hormone stimulus;BP:positive regulation of angiogenesis;BP:positive regulation of endothelial cell proliferation;BP:positive regulation of cell division;BP:multicellular organism development;BP:cell differentiation;BP:positive regulation of cell proliferation;BP:signal transduction…	ENSG00000119630	PGF	placental growth factor [Source:HGNC Symbol;Acc:HGNC:8893]	13.295	79.825
GO:0046543;GO:0000122;GO:0045944;GO:0045944;GO:0000122;GO:0046543;GO:0005615;GO:0005654;GO:0005654;GO:0005634;GO:0005634;GO:0005615;GO:0005634;GO:0046872;GO:0046872;GO:0008270;GO:000367	BP:development of secondary female sexual characteristics;BP:negative regulation of transcription from RNA polymerase II promoter;BP:positive regulation of transcription from RNA polymerase II promoter;BP:positive regulation of transcription from RNA polymerase II promoter;BP:negative regulation of transcription from RNA polymerase II promoter;BP:development of secondary female sexual characteris…	ENSG00000119669	IRF2BPL	interferon regulatory factor 2 binding protein like [Source:HGNC Symbol;Acc:HGNC:14282]	15.49	8.995
GO:0008104;GO:0007140;GO:0006298;GO:0007144;GO:0007131;GO:0007130;GO:0005712;GO:0032300;GO:0000795;GO:0001673;GO:0030983;GO:0005515;GO:0003696;GO:0003682;GO:0003697;GO:0016887;GO:0019237;GO:000552	BP:protein localization;BP:male meiosis;BP:mismatch repair;BP:female meiosis I;BP:reciprocal meiotic recombination;BP:synaptonemal complex assembly;CC:chiasma;CC:mismatch repair complex;CC:synaptonemal complex;CC:male germ cell nucleus;MF:mismatched DNA binding;MF:protein binding;MF:satellite DNA binding;MF:chromatin binding;MF:single-stranded DNA binding;MF:ATPase activity;MF:centromeric DNA bin…	ENSG00000119684	MLH3	mutL homolog 3 [Source:HGNC Symbol;Acc:HGNC:7128]	1.05	3.54
GO:0008285;GO:0051607;GO:0060337;GO:0002376;GO:0045087;GO:0051607;GO:0035457;GO:0009615;GO:0008285;GO:0043066;GO:0051607;GO:0060337;GO:0009615;GO:0043066;GO:0045087;GO:0035457;GO:0005739;GO:0005739;GO:0005739;GO:0005829;GO:0005737;GO:0005737;GO:0005829;GO:0005829;GO:0005739;GO:0005515;GO:0042802;GO:0005515;GO:0003674;GO:0042802;GO:000372	BP:negative regulation of cell proliferation;BP:defense response to virus;BP:type I interferon signaling pathway;BP:immune system process;BP:innate immune response;BP:defense response to virus;BP:cellular response to interferon-alpha;BP:response to virus;BP:negative regulation of cell proliferation;BP:negative regulation of apoptotic process;BP:defense response to virus;BP:type I interferon signa…	ENSG00000119917	IFIT3	interferon induced protein with tetratricopeptide repeats 3 [Source:HGNC Symbol;Acc:HGNC:5411]	115.32	35.115
GO:0032091;GO:0008637;GO:0051607;GO:0009615;GO:0043065;GO:0060337;GO:0035457;GO:0005829;GO:0005783;GO:0005515;GO:004482	BP:negative regulation of protein binding;BP:apoptotic mitochondrial changes;BP:defense response to virus;BP:response to virus;BP:positive regulation of apoptotic process;BP:type I interferon signaling pathway;BP:cellular response to interferon-alpha;CC:cytosol;CC:endoplasmic reticulum;MF:protein binding;MF:pol;	ENSG00000119922	IFIT2	interferon induced protein with tetratricopeptide repeats 2 [Source:HGNC Symbol;Acc:HGNC:5409]	22.81	7.64
GO:0005977;GO:0006470;GO:0050790;GO:0005978;GO:0005977;GO:0050790;GO:0006470;GO:0005975;GO:0005978;GO:0005978;GO:0005977;GO:0005977;GO:0005978;GO:0005829;GO:0005829;GO:0019888;GO:0004722;GO:0019903;GO:0005515;GO:0019888;GO:0005515;GO:0019903;GO:0004722;GO:001990	BP:glycogen metabolic process;BP:protein dephosphorylation;BP:regulation of catalytic activity;BP:glycogen biosynthetic process;BP:glycogen metabolic process;BP:regulation of catalytic activity;BP:protein dephosphorylation;BP:carbohydrate metabolic process;BP:glycogen biosynthetic process;BP:glycogen biosynthetic process;BP:glycogen metabolic process;BP:glycogen metabolic process;BP:glycogen bios…	ENSG00000119938	PPP1R3C	protein phosphatase 1 regulatory subunit 3C [Source:HGNC Symbol;Acc:HGNC:9293]	0.025	1.53
GO:0010216;GO:0031508;GO:0006346;GO:0046651;GO:0007067;GO:0007275;GO:0051301;GO:0005721;GO:0005634;GO:0004386;GO:0005524;GO:000551	BP:maintenance of DNA methylation;BP:pericentric heterochromatin assembly;BP:methylation-dependent chromatin silencing;BP:lymphocyte proliferation;BP:mitotic nuclear division;BP:multicellular organism development;BP:cell division;CC:pericentric heterochromatin;CC:nucleus;MF:helicase activity;MF:ATP binding;MF:protein binding;	ENSG00000119969	HELLS	helicase, lymphoid-specific [Source:HGNC Symbol;Acc:HGNC:4861]	2.625	5.325
GO:0051384;GO:0032869;GO:0006536;GO:0006094;GO:0007219;GO:0006520;GO:0019550;GO:0006114;GO:0006531;GO:0006103;GO:0055089;GO:0009058;GO:0008652;GO:0006107;GO:0019551;GO:0006532;GO:0006533;GO:0005737;GO:0043679;GO:0005634;GO:0005739;GO:0070062;GO:0005829;GO:0005764;GO:0030170;GO:0047801;GO:0004069;GO:0042802;GO:0031406;GO:0080130;GO:000460	BP:response to glucocorticoid;BP:cellular response to insulin stimulus;BP:glutamate metabolic process;BP:gluconeogenesis;BP:Notch signaling pathway;BP:cellular amino acid metabolic process;BP:glutamate catabolic process to aspartate;BP:glycerol biosynthetic process;BP:aspartate metabolic process;BP:2-oxoglutarate metabolic process;BP:fatty acid homeostasis;BP:biosynthetic process;BP:cellular amin…	ENSG00000120053	GOT1	glutamic-oxaloacetic transaminase 1 [Source:HGNC Symbol;Acc:HGNC:4432]	65.495	24.6
GO:0060347;GO:0034446;GO:0018108;GO:0043627;GO:0050900;GO:0007169;GO:0051897;GO:0046777;GO:0051894;GO:0050728;GO:0001666;GO:0043547;GO:0045766;GO:2000251;GO:0016525;GO:0043434;GO:0002040;GO:0031100;GO:2000352;GO:0051591;GO:0014068;GO:0060216;GO:0007267;GO:0032878;GO:0048014;GO:0051259;GO:0043552;GO:0010595;GO:0001958;GO:0001938;GO:0070374;GO:0043114;GO:0005911;GO:0005925;GO:0005737;GO:0001725;GO:…	BP:heart trabecula formation;BP:substrate adhesion-dependent cell spreading;BP:peptidyl-tyrosine phosphorylation;BP:response to estrogen;BP:leukocyte migration;BP:transmembrane receptor protein tyrosine kinase signaling pathway;BP:positive regulation of protein kinase B signaling;BP:protein autophosphorylation;BP:positive regulation of focal adhesion assembly;BP:negative regulation of inflammator…	ENSG00000120156	TEK	TEK receptor tyrosine kinase [Source:HGNC Symbol;Acc:HGNC:11724]	8.51	23.14
GO:2001181;GO:0034097;GO:0046007;GO:0070232;GO:0030335;GO:0042102;GO:0032693;GO:1903556;GO:0007166;GO:0006955;GO:0032689;GO:1901998;GO:0031295;GO:0009897;GO:0012505;GO:0016021;GO:0070062;GO:000551	BP:positive regulation of interleukin-10 secretion;BP:response to cytokine;BP:negative regulation of activated T cell proliferation;BP:regulation of T cell apoptotic process;BP:positive regulation of cell migration;BP:positive regulation of T cell proliferation;BP:negative regulation of interleukin-10 production;BP:negative regulation of tumor necrosis factor superfamily cytokine production;BP:ce…	ENSG00000120217	CD274	CD274 molecule [Source:HGNC Symbol;Acc:HGNC:17635]	65.75	12.06
GO:0005654;GO:0043231;GO:0016021;GO:001602	CC:nucleoplasm;CC:intracellular membrane-bounded organelle;CC:integral component of membrane;CC:membrane;	ENSG00000120279	MYCT1	MYC target 1 [Source:HGNC Symbol;Acc:HGNC:23172]	8.81	32.97
GO:0000165;GO:0016567;GO:0016567;GO:0008150;GO:0000165;GO:0043687;GO:0005829;GO:0005575;GO:0005829;GO:0031463;GO:0031463;GO:0005515;GO:0004842;GO:0003674;GO:0005515;GO:000484	BP:MAPK cascade;BP:protein ubiquitination;BP:protein ubiquitination;BP:biological_process;BP:MAPK cascade;BP:post-translational protein modification;CC:cytosol;CC:cellular_component;CC:cytosol;CC:Cul3-RING ubiquitin ligase complex;CC:Cul3-RING ubiquitin ligase complex;MF:protein binding;MF:ubiquitin-protein transferase activity;MF:molecular_function;MF:protein binding;MF:ubiquitin-protein transfe…	ENSG00000120696	KBTBD7	kelch repeat and BTB domain containing 7 [Source:HGNC Symbol;Acc:HGNC:25266]	0.145	1.02
GO:0071480;GO:0030509;GO:0070498;GO:0032868;GO:0042981;GO:2000182;GO:0090090;GO:0071480;GO:0071310;GO:0061418;GO:0050725;GO:0046886;GO:0045944;GO:0045893;GO:0045080;GO:0044849;GO:0042981;GO:0035914;GO:0032868;GO:0030509;GO:0030217;GO:0009749;GO:0006355;GO:0002931;GO:0001666;GO:0000122;GO:0006355;GO:0006351;GO:0006366;GO:0045893;GO:0045944;GO:0045944;GO:0001666;GO:0045944;GO:0045944;GO:0060337;GO:…	BP:cellular response to gamma radiation;BP:BMP signaling pathway;BP:interleukin-1-mediated signaling pathway;BP:response to insulin;BP:regulation of apoptotic process;BP:regulation of progesterone biosynthetic process;BP:negative regulation of canonical Wnt signaling pathway;BP:cellular response to gamma radiation;BP:cellular response to organic substance;BP:regulation of transcription from RNA p…	ENSG00000120738	EGR1	early growth response 1 [Source:HGNC Symbol;Acc:HGNC:3238]	31.785	10.385
GO:0006355;GO:0006355;GO:0005622;GO:0005622;GO:0046872;GO:0003676;GO:000367	BP:regulation of transcription, DNA-templated;BP:regulation of transcription, DNA-templated;CC:intracellular;CC:intracellular;MF:metal ion binding;MF:nucleic acid binding;MF:nucleic acid binding;	ENSG00000120784	ZFP30	ZFP30 zinc finger protein [Source:HGNC Symbol;Acc:HGNC:29555]	0.585	1.59
GO:0001706;GO:0000188;GO:0035335;GO:0016311;GO:0006470;GO:0016311;GO:0035335;GO:0070373;GO:0035970;GO:0000188;GO:0001706;GO:0005654;GO:0005654;GO:0005634;GO:0005634;GO:0005654;GO:0008330;GO:0004725;GO:0017017;GO:0017017;GO:0004721;GO:0016791;GO:0008138;GO:0004725;GO:0016787;GO:0004725;GO:0004725;GO:0016791;GO:0004725;GO:0008330;GO:199043	BP:endoderm formation;BP:inactivation of MAPK activity;BP:peptidyl-tyrosine dephosphorylation;BP:dephosphorylation;BP:protein dephosphorylation;BP:dephosphorylation;BP:peptidyl-tyrosine dephosphorylation;BP:negative regulation of ERK1 and ERK2 cascade;BP:peptidyl-threonine dephosphorylation;BP:inactivation of MAPK activity;BP:endoderm formation;CC:nucleoplasm;CC:nucleoplasm;CC:nucleus;CC:nucleus;…	ENSG00000120875	DUSP4	dual specificity phosphatase 4 [Source:HGNC Symbol;Acc:HGNC:3070]	0.365	1.63
GO:0060325;GO:007006	BP:face morphogenesis;CC:extracellular exosome;	ENSG00000121005	CRISPLD1	cysteine rich secretory protein LCCL domain containing 1 [Source:HGNC Symbol;Acc:HGNC:18206]	2.37	1.485
GO:0060431;GO:0031076;GO:0042572;GO:0042574;GO:0014032;GO:0001701;GO:0008406;GO:0043584;GO:0043583;GO:0060449;GO:0048703;GO:0007601;GO:0035115;GO:0001656;GO:0055114;GO:0002138;GO:0042572;GO:0055114;GO:0002138;GO:0005789;GO:0031090;GO:0016021;GO:0005737;GO:0044297;GO:0043231;GO:0005634;GO:0052650;GO:0016491;GO:0052650;GO:000474	BP:primary lung bud formation;BP:embryonic camera-type eye development;BP:retinol metabolic process;BP:retinal metabolic process;BP:neural crest cell development;BP:in utero embryonic development;BP:gonad development;BP:nose development;BP:ear development;BP:bud elongation involved in lung branching;BP:embryonic viscerocranium morphogenesis;BP:visual perception;BP:embryonic forelimb morphogenesis…	ENSG00000121039	RDH10	retinol dehydrogenase 10 [Source:HGNC Symbol;Acc:HGNC:19975]	2.135	10.87
GO:0016310;GO:0007596;GO:0071375;GO:0010738;GO:0010614;GO:0035308;GO:0051534;GO:0071320;GO:0010738;GO:0031594;GO:0016021;GO:0005811;GO:0005739;GO:0005759;GO:0005739;GO:0045211;GO:0030061;GO:0005829;GO:0005741;GO:0048487;GO:0030346;GO:0034237;GO:0008017;GO:0003723;GO:0034237;GO:0044822;GO:0016301;GO:0019901;GO:0019904;GO:0003723;GO:003294	BP:phosphorylation;BP:blood coagulation;BP:cellular response to peptide hormone stimulus;BP:regulation of protein kinase A signaling;BP:negative regulation of cardiac muscle hypertrophy;BP:negative regulation of protein dephosphorylation;BP:negative regulation of NFAT protein import into nucleus;BP:cellular response to cAMP;BP:regulation of protein kinase A signaling;CC:neuromuscular junction;CC:…	ENSG00000121057	AKAP1	A-kinase anchoring protein 1 [Source:HGNC Symbol;Acc:HGNC:367]	3.145	8.295
GO:0033138;GO:2000737;GO:0060340;GO:0010800;GO:0035458;GO:0010628;GO:0002741;GO:0000209;GO:0045071;GO:0010994;GO:0098586;GO:0070206;GO:0032496;GO:0045892;GO:0002230;GO:2000679;GO:1901222;GO:0005634;GO:0005829;GO:0005622;GO:0008270;GO:0016874;GO:1990782;GO:0008134;GO:0061630;GO:003067	BP:positive regulation of peptidyl-serine phosphorylation;BP:negative regulation of stem cell differentiation;BP:positive regulation of type I interferon-mediated signaling pathway;BP:positive regulation of peptidyl-threonine phosphorylation;BP:cellular response to interferon-beta;BP:positive regulation of gene expression;BP:positive regulation of cytokine secretion involved in immune response;BP…	ENSG00000121236	TRIM6	tripartite motif containing 6 [Source:HGNC Symbol;Acc:HGNC:16277]	0.18	1.345
GO:0022604;GO:0007010;GO:0018108;GO:0006357;GO:0007275;GO:0005829;GO:0016605;GO:0031624;GO:0008270;GO:0003677;GO:0000981;GO:000471	BP:regulation of cell morphogenesis;BP:cytoskeleton organization;BP:peptidyl-tyrosine phosphorylation;BP:regulation of transcription from RNA polymerase II promoter;BP:multicellular organism development;CC:cytosol;CC:PML body;MF:ubiquitin conjugating enzyme binding;MF:zinc ion binding;MF:DNA binding;MF:RNA polymerase II transcription factor activity, sequence-specific DNA binding;MF:protein tyros…	ENSG00000121741	ZMYM2	zinc finger MYM-type containing 2 [Source:HGNC Symbol;Acc:HGNC:12989]	3.6	16
GO:1902042;GO:0043280;GO:0006919;GO:2001238;GO:0090200;GO:0006955;GO:0007267;GO:0097296;GO:0043123;GO:0005615;GO:0070062;GO:0016021;GO:0005887;GO:0005125;GO:0005164;GO:004687	BP:negative regulation of extrinsic apoptotic signaling pathway via death domain receptors;BP:positive regulation of cysteine-type endopeptidase activity involved in apoptotic process;BP:activation of cysteine-type endopeptidase activity involved in apoptotic process;BP:positive regulation of extrinsic apoptotic signaling pathway;BP:positive regulation of release of cytochrome c from mitochondria…	ENSG00000121858	TNFSF10	TNF superfamily member 10 [Source:HGNC Symbol;Acc:HGNC:11925]	147.14	56.145
GO:0009249;GO:0046487;GO:0001843;GO:0009107;GO:0006954;GO:0032496;GO:0006979;GO:0005759;GO:0051539;GO:0016992;GO:004687	BP:protein lipoylation;BP:glyoxylate metabolic process;BP:neural tube closure;BP:lipoate biosynthetic process;BP:inflammatory response;BP:response to lipopolysaccharide;BP:response to oxidative stress;CC:mitochondrial matrix;MF:4 iron, 4 sulfur cluster binding;MF:lipoate synthase activity;MF:metal ion binding;	ENSG00000121897	LIAS	lipoic acid synthetase [Source:HGNC Symbol;Acc:HGNC:16429]	1.54	4.54
GO:0016021;GO:001602	CC:integral component of membrane;CC:membrane;	ENSG00000121900	TMEM54	transmembrane protein 54 [Source:HGNC Symbol;Acc:HGNC:24143]	47.6	29.74
GO:0050790;GO:0005737;GO:003069	BP:regulation of catalytic activity;CC:cytoplasm;MF:GTPase regulator activity;	ENSG00000121957	GPSM2	G protein signaling modulator 2 [Source:HGNC Symbol;Acc:HGNC:29501]	1.39	4.165
GO:0000187;GO:0070098;GO:0002407;GO:0019064;GO:0048714;GO:0050920;GO:0001666;GO:0060048;GO:0009615;GO:0043067;GO:0002064;GO:0030334;GO:0006935;GO:0019722;GO:0006915;GO:0008038;GO:0006954;GO:0022029;GO:0043217;GO:0007186;GO:0051924;GO:0007204;GO:0001764;GO:0030054;GO:0070062;GO:0016021;GO:0005770;GO:0009986;GO:0031252;GO:0005886;GO:0005764;GO:0005769;GO:0019955;GO:0008144;GO:0016494;GO:0003779;GO:…	BP:activation of MAPK activity;BP:chemokine-mediated signaling pathway;BP:dendritic cell chemotaxis;BP:fusion of virus membrane with host plasma membrane;BP:positive regulation of oligodendrocyte differentiation;BP:regulation of chemotaxis;BP:response to hypoxia;BP:cardiac muscle contraction;BP:response to virus;BP:regulation of programmed cell death;BP:epithelial cell development;BP:regulation o…	ENSG00000121966	CXCR4	C-X-C motif chemokine receptor 4 [Source:HGNC Symbol;Acc:HGNC:2561]	0.165	3.355
GO:0016020;GO:0016021;GO:001602	CC:membrane;CC:integral component of membrane;CC:membrane;	ENSG00000122490	PQLC1	PQ loop repeat containing 1 [Source:HGNC Symbol;Acc:HGNC:26188]	44.135	24.765
GO:0050873;GO:0007264;GO:0007264;GO:0005737;GO:0005730;GO:0005622;GO:0005654;GO:0005886;GO:0005886;GO:0005622;GO:0005654;GO:0005829;GO:0016020;GO:0005737;GO:0005634;GO:0005634;GO:0005730;GO:0005730;GO:0005886;GO:0005515;GO:0005525;GO:0005525;GO:0000166;GO:0005525;GO:0005515;GO:0005515;GO:000552	BP:brown fat cell differentiation;BP:small GTPase mediated signal transduction;BP:small GTPase mediated signal transduction;CC:cytoplasm;CC:nucleolus;CC:intracellular;CC:nucleoplasm;CC:plasma membrane;CC:plasma membrane;CC:intracellular;CC:nucleoplasm;CC:cytosol;CC:membrane;CC:cytoplasm;CC:nucleus;CC:nucleus;CC:nucleolus;CC:nucleolus;CC:plasma membrane;MF:protein binding;MF:GTP binding;MF:GTP bin…	ENSG00000122644	ARL4A	ADP ribosylation factor like GTPase 4A [Source:HGNC Symbol;Acc:HGNC:695]	6.99	21.95
GO:0006611;GO:0008045;GO:0007611;GO:0021660;GO:0021666;GO:0032868;GO:0045444;GO:0035284;GO:0048168;GO:0042552;GO:0014037;GO:0071310;GO:0035914;GO:0007622;GO:0021612;GO:0030278;GO:0016925;GO:0006355;GO:0006351;GO:0006355;GO:0045944;GO:0005737;GO:0005634;GO:0005634;GO:0071837;GO:0046872;GO:0003677;GO:0001102;GO:0016874;GO:0003677;GO:0046872;GO:0031625;GO:0001077;GO:0000978;GO:000368	BP:protein export from nucleus;BP:motor neuron axon guidance;BP:learning or memory;BP:rhombomere 3 formation;BP:rhombomere 5 formation;BP:response to insulin;BP:fat cell differentiation;BP:brain segmentation;BP:regulation of neuronal synaptic plasticity;BP:myelination;BP:Schwann cell differentiation;BP:cellular response to organic substance;BP:skeletal muscle cell differentiation;BP:rhythmic beha…	ENSG00000122877	EGR2	early growth response 2 [Source:HGNC Symbol;Acc:HGNC:3239]	4.33	0.405
GO:0042073;GO:0007283;GO:0035735;GO:0030992;GO:0097228;GO:0036064;GO:0005813;GO:0097225;GO:0097542;GO:0005929;GO:001563	BP:intraciliary transport;BP:spermatogenesis;BP:intraciliary transport involved in cilium assembly;CC:intraciliary transport particle B;CC:sperm principal piece;CC:ciliary basal body;CC:centrosome;CC:sperm midpiece;CC:ciliary tip;CC:cilium;MF:tubulin binding;	ENSG00000122970	IFT81	intraflagellar transport 81 [Source:HGNC Symbol;Acc:HGNC:14313]	0.66	2.77
GO:0000086;GO:0050829;GO:0008219;GO:0000042;GO:0090161;GO:0043001;GO:0043124;GO:0001920;GO:0006914;GO:0006914;GO:0016192;GO:0016192;GO:0098792;GO:0055037;GO:0005776;GO:0031410;GO:0005654;GO:0005794;GO:0048471;GO:0005794;GO:0031410;GO:0005829;GO:0005802;GO:0000139;GO:0008022;GO:0070530;GO:0042802;GO:0017137;GO:0043130;GO:0030674;GO:004313	BP:G2/M transition of mitotic cell cycle;BP:defense response to Gram-negative bacterium;BP:cell death;BP:protein targeting to Golgi;BP:Golgi ribbon formation;BP:Golgi to plasma membrane protein transport;BP:negative regulation of I-kappaB kinase/NF-kappaB signaling;BP:negative regulation of receptor recycling;BP:autophagy;BP:autophagy;BP:vesicle-mediated transport;BP:vesicle-mediated transport;BP…	ENSG00000123240	OPTN	optineurin [Source:HGNC Symbol;Acc:HGNC:17142]	140.825	58.53
GO:0006914;GO:0000045;GO:0000407;GO:0032403;GO:004280	BP:autophagy;BP:autophagosome assembly;CC:pre-autophagosomal structure;MF:protein complex binding;MF:identical protein binding;	ENSG00000123395	ATG101	autophagy related 101 [Source:HGNC Symbol;Acc:HGNC:25679]	86.895	45.885
GO:0046872;GO:000367	MF:metal ion binding;MF:nucleic acid binding;	ENSG00000123411	IKZF4	IKAROS family zinc finger 4 [Source:HGNC Symbol;Acc:HGNC:13179]	2.36	1.635
GO:0008285;GO:0007567;GO:0007256;GO:0016310;GO:0006468;GO:0060721;GO:0005737;GO:0005737;GO:0016301;GO:0016740;GO:0005524;GO:0005524;GO:0004674;GO:0000166;GO:0004672;GO:0004702;GO:0004702;GO:000552	BP:negative regulation of cell proliferation;BP:parturition;BP:activation of JNKK activity;BP:phosphorylation;BP:protein phosphorylation;BP:regulation of spongiotrophoblast cell proliferation;CC:cytoplasm;CC:cytoplasm;MF:kinase activity;MF:transferase activity;MF:ATP binding;MF:ATP binding;MF:protein serine/threonine kinase activity;MF:nucleotide binding;MF:protein kinase activity;MF:receptor sig…	ENSG00000123572	NRK	Nik related kinase [Source:HGNC Symbol;Acc:HGNC:25391]	0.45	0.255
GO:0007155;GO:0050728;GO:0007267;GO:0007165;GO:000554	BP:cell adhesion;BP:negative regulation of inflammatory response;BP:cell-cell signaling;BP:signal transduction;MF:hyaluronic acid binding;	ENSG00000123610	TNFAIP6	TNF alpha induced protein 6 [Source:HGNC Symbol;Acc:HGNC:11898]	0.8	0.035
GO:0000122;GO:0009615;GO:0043011;GO:0005634;GO:0003714;GO:0005515;GO:0000978;GO:000107	BP:negative regulation of transcription from RNA polymerase II promoter;BP:response to virus;BP:myeloid dendritic cell differentiation;CC:nucleus;MF:transcription corepressor activity;MF:protein binding;MF:RNA polymerase II core promoter proximal region sequence-specific DNA binding;MF:transcriptional repressor activity, RNA polymerase II core promoter proximal region sequence-specific binding;	ENSG00000123685	BATF3	basic leucine zipper ATF-like transcription factor 3 [Source:HGNC Symbol;Acc:HGNC:28915]	21.545	0.475
GO:0006508;GO:0005737;GO:0072562;GO:0005654;GO:0004177;GO:0008270;GO:000823	BP:proteolysis;CC:cytoplasm;CC:blood microparticle;CC:nucleoplasm;MF:aminopeptidase activity;MF:zinc ion binding;MF:metallopeptidase activity;	ENSG00000123992	DNPEP	aspartyl aminopeptidase [Source:HGNC Symbol;Acc:HGNC:2981]	83.71	38.875
GO:0005739;GO:0005654;GO:0005634;GO:0005515;GO:000551	CC:mitochondrion;CC:nucleoplasm;CC:nucleus;MF:protein binding;MF:protein binding;	ENSG00000124019	FAM124B	family with sequence similarity 124 member B [Source:HGNC Symbol;Acc:HGNC:26224]	3.515	42.96
GO:0071805;GO:0071805;GO:0051260;GO:0034765;GO:0006813;GO:0006813;GO:0006813;GO:0006811;GO:0006811;GO:0055085;GO:0006810;GO:0006813;GO:1902259;GO:0051260;GO:1902259;GO:0034765;GO:0005886;GO:0005886;GO:0008076;GO:0016020;GO:0016021;GO:0016020;GO:0048471;GO:0005886;GO:0008076;GO:0008076;GO:0048471;GO:0005515;GO:0005267;GO:0005249;GO:0005244;GO:0005216;GO:0005515;GO:0015459;GO:0015459;GO:0005251;GO:…	BP:potassium ion transmembrane transport;BP:potassium ion transmembrane transport;BP:protein homooligomerization;BP:regulation of ion transmembrane transport;BP:potassium ion transport;BP:potassium ion transport;BP:potassium ion transport;BP:ion transport;BP:ion transport;BP:transmembrane transport;BP:transport;BP:potassium ion transport;BP:regulation of delayed rectifier potassium channel activi…	ENSG00000124134	KCNS1	potassium voltage-gated channel modifier subfamily S member 1 [Source:HGNC Symbol;Acc:HGNC:6300]	0.175	0.52
GO:0060122;GO:0051894;GO:0051496;GO:0045860;GO:0042060;GO:0010762;GO:0001843;GO:0001657;GO:0007165;GO:0050900;GO:0001523;GO:0006024;GO:0006027;GO:0030203;GO:1903543;GO:1903553;GO:0042130;GO:1903553;GO:0007165;GO:0001523;GO:0051894;GO:0051496;GO:0010762;GO:0001843;GO:0042060;GO:0060122;GO:0001657;GO:1903543;GO:0045860;GO:0006027;GO:0006024;GO:0045121;GO:0043034;GO:0009986;GO:0009986;GO:0005925;GO:…	BP:inner ear receptor stereocilium organization;BP:positive regulation of focal adhesion assembly;BP:positive regulation of stress fiber assembly;BP:positive regulation of protein kinase activity;BP:wound healing;BP:regulation of fibroblast migration;BP:neural tube closure;BP:ureteric bud development;BP:signal transduction;BP:leukocyte migration;BP:retinoid metabolic process;BP:glycosaminoglycan …	ENSG00000124145	SDC4	syndecan 4 [Source:HGNC Symbol;Acc:HGNC:10661]	54.455	25.06
GO:0032436;GO:0030154;GO:0000209;GO:0007283;GO:0007275;GO:0005737;GO:0005622;GO:0005829;GO:0005634;GO:0031624;GO:0061630;GO:0008270;GO:001687	BP:positive regulation of proteasomal ubiquitin-dependent protein catabolic process;BP:cell differentiation;BP:protein polyubiquitination;BP:spermatogenesis;BP:multicellular organism development;CC:cytoplasm;CC:intracellular;CC:cytosol;CC:nucleus;MF:ubiquitin conjugating enzyme binding;MF:ubiquitin protein ligase activity;MF:zinc ion binding;MF:ligase activity;	ENSG00000124226	RNF114	ring finger protein 114 [Source:HGNC Symbol;Acc:HGNC:13094]	213.065	59.055
GO:0006694;GO:0006707;GO:0006355;GO:0006351;GO:0007275;GO:0045893;GO:0006694;GO:0006357;GO:0042592;GO:0046885;GO:0006707;GO:0042592;GO:0006357;GO:0045893;GO:0007275;GO:0046885;GO:0000118;GO:0005654;GO:0005829;GO:0005730;GO:0005634;GO:0005634;GO:0005634;GO:0005667;GO:0000118;GO:0005667;GO:0001104;GO:0044212;GO:0003700;GO:0008134;GO:0003700;GO:0003677;GO:0003677;GO:0046872;GO:0003676;GO:0030374;GO:…	BP:steroid biosynthetic process;BP:cholesterol catabolic process;BP:regulation of transcription, DNA-templated;BP:transcription, DNA-templated;BP:multicellular organism development;BP:positive regulation of transcription, DNA-templated;BP:steroid biosynthetic process;BP:regulation of transcription from RNA polymerase II promoter;BP:homeostatic process;BP:regulation of hormone biosynthetic process…	ENSG00000124496	TRERF1	transcriptional regulating factor 1 [Source:HGNC Symbol;Acc:HGNC:18273]	0.13	1.01
GO:0008150;GO:0005634;GO:0005634;GO:0008270;GO:0046872;GO:0008270;GO:000367	BP:biological_process;CC:nucleus;CC:nucleus;MF:zinc ion binding;MF:metal ion binding;MF:zinc ion binding;MF:molecular_function;	ENSG00000124593	AL365205.1	Prickle-like protein 4 [Source:UniProtKB/Swiss-Prot;Acc:Q2TBC4]	0.91	2.805
GO:0042278;GO:0019213;GO:0005515;GO:000188	BP:purine nucleoside metabolic process;MF:deacetylase activity;MF:protein binding;MF:purine nucleoside binding;	ENSG00000124596	OARD1	O-acyl-ADP-ribose deacylase 1 [Source:HGNC Symbol;Acc:HGNC:21257]	2.975	9.14
GO:0007021;GO:0009987;GO:0006457;GO:0007023;GO:0007023;GO:0007021;GO:0007023;GO:0000902;GO:0007023;GO:0005737;GO:0032391;GO:0005829;GO:0005737;GO:0005737;GO:0005856;GO:0032391;GO:0005874;GO:0044464;GO:0005874;GO:0015631;GO:0003924;GO:0051087;GO:0051087;GO:0003924;GO:001563	BP:tubulin complex assembly;BP:cellular process;BP:protein folding;BP:post-chaperonin tubulin folding pathway;BP:post-chaperonin tubulin folding pathway;BP:tubulin complex assembly;BP:post-chaperonin tubulin folding pathway;BP:cell morphogenesis;BP:post-chaperonin tubulin folding pathway;CC:cytoplasm;CC:photoreceptor connecting cilium;CC:cytosol;CC:cytoplasm;CC:cytoplasm;CC:cytoskeleton;CC:photor…	ENSG00000124659	TBCC	tubulin folding cofactor C [Source:HGNC Symbol;Acc:HGNC:11580]	21.355	13.855
GO:0016055;GO:0031328;GO:0023056;GO:0010628;GO:0007165;GO:0010647;GO:0051223;GO:0003206;GO:0032270;GO:0031399;GO:0065008;GO:0042127;GO:0008283;GO:0006366;GO:0006974;GO:0045893;GO:0051173;GO:0007267;GO:0003231;GO:0022008;GO:0032268;GO:0031647;GO:0010941;GO:0006355;GO:0010557;GO:0090263;GO:0071333;GO:0060993;GO:0060563;GO:0060548;GO:0060412;GO:0060174;GO:0060070;GO:0050821;GO:0048485;GO:0045944;GO:…	BP:Wnt signaling pathway;BP:positive regulation of cellular biosynthetic process;BP:positive regulation of signaling;BP:positive regulation of gene expression;BP:signal transduction;BP:positive regulation of cell communication;BP:regulation of protein transport;BP:cardiac chamber morphogenesis;BP:positive regulation of cellular protein metabolic process;BP:regulation of protein modification proce…	ENSG00000124766	SOX4	SRY-box 4 [Source:HGNC Symbol;Acc:HGNC:11200]	3.695	22.755
GO:001602	CC:integral component of membrane;	ENSG00000125247	TMTC4	transmembrane and tetratricopeptide repeat containing 4 [Source:HGNC Symbol;Acc:HGNC:25904]	3.7	11.92
GO:0071260;GO:0007596;GO:0002819;GO:0035458;GO:0032728;GO:0008285;GO:0045084;GO:0034124;GO:0006915;GO:0007050;GO:0060333;GO:0045892;GO:0060337;GO:0045590;GO:0050776;GO:0051607;GO:0006355;GO:0045944;GO:2000564;GO:0043374;GO:0005737;GO:0005634;GO:0005654;GO:0000790;GO:0005829;GO:0001077;GO:0003700;GO:0005515;GO:0000975;GO:000097	BP:cellular response to mechanical stimulus;BP:blood coagulation;BP:regulation of adaptive immune response;BP:cellular response to interferon-beta;BP:positive regulation of interferon-beta production;BP:negative regulation of cell proliferation;BP:positive regulation of interleukin-12 biosynthetic process;BP:regulation of MyD88-dependent toll-like receptor signaling pathway;BP:apoptotic process;B…	ENSG00000125347	IRF1	interferon regulatory factor 1 [Source:HGNC Symbol;Acc:HGNC:6116]	1260.76	31.665
GO:0043547;GO:0043547;GO:0000165;GO:0007399;GO:0007417;GO:0007411;GO:0000165;GO:0007417;GO:0005576;GO:0005622;GO:0005576;GO:0005622;GO:0005576;GO:0005088;GO:0008083;GO:0008083;GO:0005102;GO:0005088;GO:000808	BP:positive regulation of GTPase activity;BP:positive regulation of GTPase activity;BP:MAPK cascade;BP:nervous system development;BP:central nervous system development;BP:axon guidance;BP:MAPK cascade;BP:central nervous system development;CC:extracellular region;CC:intracellular;CC:extracellular region;CC:intracellular;CC:extracellular region;MF:Ras guanyl-nucleotide exchange factor activity;MF:g…	ENSG00000125650	PSPN	persephin [Source:HGNC Symbol;Acc:HGNC:9579]	0.66	0.345
GO:0006508;GO:0006508;GO:0006914;GO:0015031;GO:0006810;GO:0006914;GO:0005737;GO:0008234;GO:0008233;GO:0016787;GO:000419	BP:proteolysis;BP:proteolysis;BP:autophagy;BP:protein transport;BP:transport;BP:autophagy;CC:cytoplasm;MF:cysteine-type peptidase activity;MF:peptidase activity;MF:hydrolase activity;MF:cysteine-type endopeptidase activity;	ENSG00000125703	ATG4C	autophagy related 4C cysteine peptidase [Source:HGNC Symbol;Acc:HGNC:16040]	0.805	2.01
GO:0030449;GO:0006954;GO:0010828;GO:0014070;GO:0010866;GO:0033993;GO:0010884;GO:2000427;GO:0045745;GO:0044767;GO:0006956;GO:0006957;GO:0010951;GO:0010575;GO:0001934;GO:0070062;GO:0072562;GO:0005886;GO:0005576;GO:0004252;GO:0031715;GO:000486	BP:regulation of complement activation;BP:inflammatory response;BP:positive regulation of glucose transport;BP:response to organic cyclic compound;BP:regulation of triglyceride biosynthetic process;BP:response to lipid;BP:positive regulation of lipid storage;BP:positive regulation of apoptotic cell clearance;BP:positive regulation of G-protein coupled receptor protein signaling pathway;BP:single-…	ENSG00000125730	C3	complement C3 [Source:HGNC Symbol;Acc:HGNC:1318]	1.255	0.37
GO:0051056;GO:0006897;GO:0030036;GO:0043547;GO:0005856;GO:0001891;GO:0070062;GO:0005829;GO:0005802;GO:0005764;GO:0005938;GO:0048471;GO:0042995;GO:0005654;GO:0005096;GO:0008289;GO:0005086;GO:004280	BP:regulation of small GTPase mediated signal transduction;BP:endocytosis;BP:actin cytoskeleton organization;BP:positive regulation of GTPase activity;CC:cytoskeleton;CC:phagocytic cup;CC:extracellular exosome;CC:cytosol;CC:trans-Golgi network;CC:lysosome;CC:cell cortex;CC:perinuclear region of cytoplasm;CC:cell projection;CC:nucleoplasm;MF:GTPase activator activity;MF:lipid binding;MF:ARF guanyl…	ENSG00000125733	TRIP10	thyroid hormone receptor interactor 10 [Source:HGNC Symbol;Acc:HGNC:12304]	56.555	32.74
GO:0006629;GO:2001070;GO:000808	BP:lipid metabolic process;MF:starch binding;MF:phosphoric diester hydrolase activity;	ENSG00000125772	GPCPD1	glycerophosphocholine phosphodiesterase 1 [Source:HGNC Symbol;Acc:HGNC:26957]	0.41	2.93
GO:0016021;GO:0043025;GO:0030133;GO:000588	CC:integral component of membrane;CC:neuronal cell body;CC:transport vesicle;CC:plasma membrane;	ENSG00000125841	NRSN2	neurensin 2 [Source:HGNC Symbol;Acc:HGNC:16229]	77.58	35.63
GO:0000187;GO:0035630;GO:0051042;GO:0048711;GO:0003308;GO:0045666;GO:0072138;GO:0021537;GO:0003130;GO:0030501;GO:0010862;GO:1902895;GO:0072138;GO:0071407;GO:0071363;GO:0061036;GO:0060804;GO:0060129;GO:0060128;GO:0060039;GO:0055008;GO:0055007;GO:0048839;GO:0048711;GO:0045944;GO:0045778;GO:0045669;GO:0045666;GO:0045600;GO:0045597;GO:0045165;GO:0042487;GO:0042482;GO:0042475;GO:0035054;GO:0033690;GO:…	BP:activation of MAPK activity;BP:bone mineralization involved in bone maturation;BP:negative regulation of calcium-independent cell-cell adhesion;BP:positive regulation of astrocyte differentiation;BP:negative regulation of Wnt signaling pathway involved in heart development;BP:positive regulation of neuron differentiation;BP:mesenchymal cell proliferation involved in ureteric bud development;BP…	ENSG00000125845	BMP2	bone morphogenetic protein 2 [Source:HGNC Symbol;Acc:HGNC:1069]	34.73	15.16
GO:0006264;GO:0090305;GO:0043504;GO:0005739;GO:000829	BP:mitochondrial DNA replication;BP:nucleic acid phosphodiester bond hydrolysis;BP:mitochondrial DNA repair;CC:mitochondrion;MF:single-stranded DNA exodeoxyribonuclease activity;	ENSG00000125871	MGME1	mitochondrial genome maintenance exonuclease 1 [Source:HGNC Symbol;Acc:HGNC:16205]	2.53	7.385
GO:0009653;GO:0060429;GO:0048513;GO:0044763;GO:1903053;GO:0060231;GO:0050884;GO:0048705;GO:0048644;GO:0048339;GO:0045198;GO:0043588;GO:0043583;GO:0042755;GO:0036342;GO:0010468;GO:0009952;GO:0007517;GO:0003016;GO:0001756;GO:0006355;GO:0006351;GO:0007275;GO:0006357;GO:0007498;GO:0005634;GO:0003677;GO:0046983;GO:000370	BP:anatomical structure morphogenesis;BP:epithelium development;BP:animal organ development;BP:single-organism cellular process;BP:regulation of extracellular matrix organization;BP:mesenchymal to epithelial transition;BP:neuromuscular process controlling posture;BP:skeletal system morphogenesis;BP:muscle organ morphogenesis;BP:paraxial mesoderm development;BP:establishment of epithelial cell api…	ENSG00000125878	TCF15	transcription factor 15 [Source:HGNC Symbol;Acc:HGNC:11627]	0.3	1.25
GO:0000724;GO:0048232;GO:0000082;GO:0007292;GO:0006974;GO:0007049;GO:0006281;GO:0006974;GO:0006974;GO:0006260;GO:0006260;GO:0000082;GO:0006260;GO:0007292;GO:0048232;GO:0006260;GO:0005654;GO:0005634;GO:0097362;GO:0005634;GO:0005634;GO:0005654;GO:0097362;GO:0004386;GO:0005515;GO:0003677;GO:0004386;GO:0003677;GO:0016787;GO:0005524;GO:0005524;GO:0000166;GO:0005515;GO:0003677;GO:000552	BP:double-strand break repair via homologous recombination;BP:male gamete generation;BP:G1/S transition of mitotic cell cycle;BP:female gamete generation;BP:cellular response to DNA damage stimulus;BP:cell cycle;BP:DNA repair;BP:cellular response to DNA damage stimulus;BP:cellular response to DNA damage stimulus;BP:DNA replication;BP:DNA replication;BP:G1/S transition of mitotic cell cycle;BP:DNA…	ENSG00000125885	MCM8	minichromosome maintenance 8 homologous recombination repair factor [Source:HGNC Symbol;Acc:HGNC:16147]	0.7	2.15
GO:0005737;GO:0000922;GO:0005815;GO:000551	CC:cytoplasm;CC:spindle pole;CC:microtubule organizing center;MF:protein binding;	ENSG00000125898	FAM110A	family with sequence similarity 110 member A [Source:HGNC Symbol;Acc:HGNC:16188]	6.055	2.63
GO:0003376;GO:0007202;GO:0007204;GO:0007189;GO:0006955;GO:0007186;GO:0016020;GO:0016021;GO:0005887;GO:0004930;GO:0038036;GO:000828	BP:sphingosine-1-phosphate signaling pathway;BP:activation of phospholipase C activity;BP:positive regulation of cytosolic calcium ion concentration;BP:adenylate cyclase-activating G-protein coupled receptor signaling pathway;BP:immune response;BP:G-protein coupled receptor signaling pathway;CC:membrane;CC:integral component of membrane;CC:integral component of plasma membrane;MF:G-protein couple…	ENSG00000125910	S1PR4	sphingosine-1-phosphate receptor 4 [Source:HGNC Symbol;Acc:HGNC:3170]	0.455	1.865
GO:0048678;GO:0010629;GO:0060041;GO:0032868;GO:0048264;GO:0071375;GO:0070206;GO:0006461;GO:0051402;GO:0009267;GO:0006357;GO:0030097;GO:0030425;GO:0005737;GO:0016605;GO:0071339;GO:0071141;GO:0003713;GO:0032403;GO:0000983;GO:0042803;GO:0000978;GO:0000975;GO:0046983;GO:004698	BP:response to axon injury;BP:negative regulation of gene expression;BP:retina development in camera-type eye;BP:response to insulin;BP:determination of ventral identity;BP:cellular response to peptide hormone stimulus;BP:protein trimerization;BP:protein complex assembly;BP:neuron apoptotic process;BP:cellular response to starvation;BP:regulation of transcription from RNA polymerase II promoter;B…	ENSG00000125952	MAX	MYC associated factor X [Source:HGNC Symbol;Acc:HGNC:6913]	86.815	48.51
GO:0030326;GO:2001054;GO:0050680;GO:0098779;GO:0043524;GO:0060591;GO:0010862;GO:0007267;GO:0042981;GO:0032332;GO:0051216;GO:0007179;GO:0010862;GO:0043408;GO:0048468;GO:0060395;GO:0007184;GO:0050680;GO:0060591;GO:0030513;GO:0032331;GO:0043408;GO:0032332;GO:0032331;GO:0045666;GO:0007184;GO:0035136;GO:0035137;GO:0007267;GO:0040007;GO:0030513;GO:0007179;GO:0040014;GO:0060395;GO:0005576;GO:0005886;GO:…	BP:embryonic limb morphogenesis;BP:negative regulation of mesenchymal cell apoptotic process;BP:negative regulation of epithelial cell proliferation;BP:mitophagy in response to mitochondrial depolarization;BP:negative regulation of neuron apoptotic process;BP:chondroblast differentiation;BP:positive regulation of pathway-restricted SMAD protein phosphorylation;BP:cell-cell signaling;BP:regulation…	ENSG00000125965	GDF5	growth differentiation factor 5 [Source:HGNC Symbol;Acc:HGNC:4220]	0.89	0.405
GO:0006629;GO:0034378;GO:0009791;GO:1903955;GO:0045944;GO:2001244;GO:0045944;GO:0034378;GO:0009791;GO:0006629;GO:0006351;GO:0006355;GO:0006351;GO:0006366;GO:1903955;GO:0034378;GO:2001244;GO:0005634;GO:0005634;GO:0005634;GO:0005634;GO:0005634;GO:0043565;GO:0001077;GO:0003700;GO:0003677;GO:0046872;GO:0003676;GO:0003700;GO:0043565;GO:0001077;GO:004687	BP:lipid metabolic process;BP:chylomicron assembly;BP:post-embryonic development;BP:positive regulation of protein targeting to mitochondrion;BP:positive regulation of transcription from RNA polymerase II promoter;BP:positive regulation of intrinsic apoptotic signaling pathway;BP:positive regulation of transcription from RNA polymerase II promoter;BP:chylomicron assembly;BP:post-embryonic develop…	ENSG00000126003	PLAGL2	PLAG1 like zinc finger 2 [Source:HGNC Symbol;Acc:HGNC:9047]	12.65	6.35
GO:0032922;GO:0071222;GO:2000189;GO:2000188;GO:0043401;GO:0070859;GO:0061178;GO:0030522;GO:0000122;GO:2000188;GO:0070859;GO:0061469;GO:0061178;GO:0060086;GO:0045893;GO:0045892;GO:0045598;GO:0044321;GO:0042752;GO:0032922;GO:0019216;GO:0010498;GO:0007623;GO:0006355;GO:0005978;GO:0048511;GO:0043401;GO:0030522;GO:0006355;GO:0006351;GO:0006355;GO:0030154;GO:0045893;GO:0000122;GO:0005978;GO:0071222;GO:…	BP:circadian regulation of gene expression;BP:cellular response to lipopolysaccharide;BP:positive regulation of cholesterol homeostasis;BP:regulation of cholesterol homeostasis;BP:steroid hormone mediated signaling pathway;BP:positive regulation of bile acid biosynthetic process;BP:regulation of insulin secretion involved in cellular response to glucose stimulus;BP:intracellular receptor signalin…	ENSG00000126368	NR1D1	nuclear receptor subfamily 1 group D member 1 [Source:HGNC Symbol;Acc:HGNC:7962]	0.46	1.67
GO:0006631;GO:0007595;GO:0007165;GO:0006355;GO:0018108;GO:0038161;GO:0007165;GO:0006549;GO:0006355;GO:0046449;GO:0000255;GO:0006103;GO:0006600;GO:0043536;GO:0019530;GO:0006573;GO:0040014;GO:0060397;GO:0006105;GO:0001938;GO:0006107;GO:0006357;GO:0006101;GO:0005634;GO:0005737;GO:0005634;GO:0005654;GO:0005829;GO:0004871;GO:0003700;GO:0004871;GO:0003677;GO:0004713;GO:0003700;GO:000551	BP:fatty acid metabolic process;BP:lactation;BP:signal transduction;BP:regulation of transcription, DNA-templated;BP:peptidyl-tyrosine phosphorylation;BP:prolactin signaling pathway;BP:signal transduction;BP:isoleucine metabolic process;BP:regulation of transcription, DNA-templated;BP:creatinine metabolic process;BP:allantoin metabolic process;BP:2-oxoglutarate metabolic process;BP:creatine metab…	ENSG00000126561	STAT5A	signal transducer and activator of transcription 5A [Source:HGNC Symbol;Acc:HGNC:11366]	53.28	15.37
GO:0006355;GO:0006351;GO:0006366;GO:0006355;GO:0045893;GO:0045944;GO:0030154;GO:0045944;GO:0045944;GO:0045893;GO:0071774;GO:0030154;GO:0006355;GO:0045944;GO:0005654;GO:0005634;GO:0005634;GO:0005634;GO:0005634;GO:0005654;GO:0043565;GO:0005515;GO:0043565;GO:0003700;GO:0003700;GO:0003677;GO:0005515;GO:0000978;GO:0001077;GO:0001085;GO:0003700;GO:0001077;GO:0003677;GO:000097	BP:regulation of transcription, DNA-templated;BP:transcription, DNA-templated;BP:transcription from RNA polymerase II promoter;BP:regulation of transcription, DNA-templated;BP:positive regulation of transcription, DNA-templated;BP:positive regulation of transcription from RNA polymerase II promoter;BP:cell differentiation;BP:positive regulation of transcription from RNA polymerase II promoter;BP:…	ENSG00000126767	ELK1	ELK1, ETS transcription factor [Source:HGNC Symbol;Acc:HGNC:3321]	30.945	13.535
GO:0090084;GO:0007141;GO:0042026;GO:1901896;GO:0007286;GO:0009409;GO:0009408;GO:0070194;GO:0031662;GO:0000795;GO:0005739;GO:0072562;GO:0072687;GO:0036128;GO:0070062;GO:0043209;GO:0005634;GO:0016020;GO:0009986;GO:0001673;GO:0005829;GO:0019899;GO:0051082;GO:0005524;GO:005186	BP:negative regulation of inclusion body assembly;BP:male meiosis I;BP:protein refolding;BP:positive regulation of calcium-transporting ATPase activity;BP:spermatid development;BP:response to cold;BP:response to heat;BP:synaptonemal complex disassembly;BP:positive regulation of cyclin-dependent protein serine/threonine kinase activity involved in G2/M transition of mitotic cell cycle;CC:synaptone…	ENSG00000126803	HSPA2	heat shock protein family A (Hsp70) member 2 [Source:HGNC Symbol;Acc:HGNC:5235]	9.395	39.41
GO:0016020;GO:000577	CC:membrane;CC:peroxisome;	ENSG00000126950	TMEM35A	transmembrane protein 35A [Source:HGNC Symbol;Acc:HGNC:25864]	1.745	5.72
GO:1902042;GO:0010803;GO:0043507;GO:0002726;GO:1902531;GO:0007250;GO:0043623;GO:0006919;GO:0071550;GO:0070534;GO:0043123;GO:0070207;GO:0010939;GO:0032743;GO:2001238;GO:0050870;GO:1901215;GO:0051092;GO:0070059;GO:0090073;GO:0051865;GO:0097296;GO:0001932;GO:0035631;GO:0009898;GO:1990604;GO:0005829;GO:0000151;GO:0097057;GO:0004871;GO:0046872;GO:0042802;GO:0046625;GO:0005174;GO:0019901;GO:0019903;GO:…	BP:negative regulation of extrinsic apoptotic signaling pathway via death domain receptors;BP:regulation of tumor necrosis factor-mediated signaling pathway;BP:positive regulation of JUN kinase activity;BP:positive regulation of T cell cytokine production;BP:regulation of intracellular signal transduction;BP:activation of NF-kappaB-inducing kinase activity;BP:cellular protein complex assembly;BP:…	ENSG00000127191	TRAF2	TNF receptor associated factor 2 [Source:HGNC Symbol;Acc:HGNC:12032]	25.035	10.4
GO:0006468;GO:0007224;GO:0051534;GO:0018108;GO:1901796;GO:0045725;GO:0042771;GO:0005737;GO:0000151;GO:0005654;GO:0030529;GO:0000287;GO:0030145;GO:0004674;GO:0043130;GO:0004712;GO:0004713;GO:000552	BP:protein phosphorylation;BP:smoothened signaling pathway;BP:negative regulation of NFAT protein import into nucleus;BP:peptidyl-tyrosine phosphorylation;BP:regulation of signal transduction by p53 class mediator;BP:positive regulation of glycogen biosynthetic process;BP:intrinsic apoptotic signaling pathway in response to DNA damage by p53 class mediator;CC:cytoplasm;CC:ubiquitin ligase complex…	ENSG00000127334	DYRK2	dual specificity tyrosine phosphorylation regulated kinase 2 [Source:HGNC Symbol;Acc:HGNC:3093]	0.89	1.905
GO:0048738;GO:0000122;GO:0007519;GO:0016575;GO:0006355;GO:0044255;GO:0005737;GO:0016580;GO:0000806;GO:0000805;GO:0030849;GO:0001741;GO:0004407;GO:0001106;GO:0005515;GO:000368	BP:cardiac muscle tissue development;BP:negative regulation of transcription from RNA polymerase II promoter;BP:skeletal muscle tissue development;BP:histone deacetylation;BP:regulation of transcription, DNA-templated;BP:cellular lipid metabolic process;CC:cytoplasm;CC:Sin3 complex;CC:Y chromosome;CC:X chromosome;CC:autosome;CC:XY body;MF:histone deacetylase activity;MF:RNA polymerase II transcri…	ENSG00000127511	SIN3B	SIN3 transcription regulator family member B [Source:HGNC Symbol;Acc:HGNC:19354]	45.04	23.315
GO:0040029;GO:0045429;GO:0043249;GO:0035264;GO:0036003;GO:0001701;GO:0000902;GO:0071356;GO:0051247;GO:0060509;GO:0070301;GO:0071499;GO:0071409;GO:0071347;GO:0032715;GO:1901653;GO:0005634;GO:0003676;GO:0043565;GO:0046872;GO:0003700;GO:000551	BP:regulation of gene expression, epigenetic;BP:positive regulation of nitric oxide biosynthetic process;BP:erythrocyte maturation;BP:multicellular organism growth;BP:positive regulation of transcription from RNA polymerase II promoter in response to stress;BP:in utero embryonic development;BP:cell morphogenesis;BP:cellular response to tumor necrosis factor;BP:positive regulation of protein metab…	ENSG00000127528	KLF2	Kruppel like factor 2 [Source:HGNC Symbol;Acc:HGNC:6347]	4.885	21.36
GO:0097190;GO:0032816;GO:0045429;GO:0007165;GO:0032496;GO:0032092;GO:0002281;GO:0030890;GO:0044260;GO:0044093;GO:0035666;GO:0043123;GO:0032760;GO:0070266;GO:0042108;GO:0034128;GO:0045087;GO:0002252;GO:0045080;GO:0050871;GO:0032481;GO:0043393;GO:0051171;GO:0006954;GO:0051092;GO:0007165;GO:0045087;GO:0044271;GO:0051607;GO:0045359;GO:0031663;GO:0043496;GO:0031398;GO:0043330;GO:0032755;GO:0010008;GO:…	BP:apoptotic signaling pathway;BP:positive regulation of natural killer cell activation;BP:positive regulation of nitric oxide biosynthetic process;BP:signal transduction;BP:response to lipopolysaccharide;BP:positive regulation of protein binding;BP:macrophage activation involved in immune response;BP:positive regulation of B cell proliferation;BP:cellular macromolecule metabolic process;BP:posit…	ENSG00000127666	TICAM1	toll like receptor adaptor molecule 1 [Source:HGNC Symbol;Acc:HGNC:18348]	32.665	11.395
GO:0033138;GO:0000086;GO:0016310;GO:0060307;GO:0007020;GO:0043547;GO:0000165;GO:0007165;GO:0007268;GO:1901018;GO:0071320;GO:0086091;GO:0005813;GO:0005795;GO:0008076;GO:0005801;GO:0005829;GO:0005088;GO:0032947;GO:0003677;GO:0044325;GO:0015459;GO:0016301;GO:0005102;GO:003423	BP:positive regulation of peptidyl-serine phosphorylation;BP:G2/M transition of mitotic cell cycle;BP:phosphorylation;BP:regulation of ventricular cardiac muscle cell membrane repolarization;BP:microtubule nucleation;BP:positive regulation of GTPase activity;BP:MAPK cascade;BP:signal transduction;BP:chemical synaptic transmission;BP:positive regulation of potassium ion transmembrane transporter a…	ENSG00000127914	AKAP9	A-kinase anchoring protein 9 [Source:HGNC Symbol;Acc:HGNC:379]	1.7	5.835
GO:0006457;GO:1904322;GO:0050805;GO:0051301;GO:0007188;GO:0007049;GO:0043949;GO:0043434;GO:0007193;GO:0005737;GO:0070062;GO:0005834;GO:0005813;GO:0005634;GO:0005886;GO:0045121;GO:0030496;GO:0005765;GO:0032794;GO:0004871;GO:0001664;GO:0000287;GO:0031821;GO:0005525;GO:0031683;GO:0003924;GO:001900	BP:protein folding;BP:cellular response to forskolin;BP:negative regulation of synaptic transmission;BP:cell division;BP:adenylate cyclase-modulating G-protein coupled receptor signaling pathway;BP:cell cycle;BP:regulation of cAMP-mediated signaling;BP:response to peptide hormone;BP:adenylate cyclase-inhibiting G-protein coupled receptor signaling pathway;CC:cytoplasm;CC:extracellular exosome;CC:…	ENSG00000127955	GNAI1	G protein subunit alpha i1 [Source:HGNC Symbol;Acc:HGNC:4384]	1.015	5.26
GO:0016558;GO:0060152;GO:0005778;GO:0070062;GO:0005829;GO:0008022;GO:0042623;GO:0032403;GO:000552	BP:protein import into peroxisome matrix;BP:microtubule-based peroxisome localization;CC:peroxisomal membrane;CC:extracellular exosome;CC:cytosol;MF:protein C-terminus binding;MF:ATPase activity, coupled;MF:protein complex binding;MF:ATP binding;	ENSG00000127980	PEX1	peroxisomal biogenesis factor 1 [Source:HGNC Symbol;Acc:HGNC:8850]	0.915	2.47
GO:0006355;GO:0005622;GO:000367	BP:regulation of transcription, DNA-templated;CC:intracellular;MF:nucleic acid binding;	ENSG00000128000	ZNF780B	zinc finger protein 780B [Source:HGNC Symbol;Acc:HGNC:33109]	0.28	1.335
GO:0007409;GO:0007409;GO:0007268;GO:0009986;GO:0005886;GO:0016021;GO:0016020;GO:0030054;GO:0045202;GO:0045211;GO:0005615;GO:0005886;GO:0014069;GO:0005578;GO:0009986;GO:0045211;GO:0014069;GO:0016021;GO:003005	BP:axonogenesis;BP:axonogenesis;BP:chemical synaptic transmission;CC:cell surface;CC:plasma membrane;CC:integral component of membrane;CC:membrane;CC:cell junction;CC:synapse;CC:postsynaptic membrane;CC:extracellular space;CC:plasma membrane;CC:postsynaptic density;CC:proteinaceous extracellular matrix;CC:cell surface;CC:postsynaptic membrane;CC:postsynaptic density;CC:integral component of membr…	ENSG00000128011	LRFN1	leucine rich repeat and fibronectin type III domain containing 1 [Source:HGNC Symbol;Acc:HGNC:29290]	0.035	0.465
GO:0000122;GO:0032680;GO:0060213;GO:0044763;GO:0042594;GO:0070935;GO:0010494;GO:0005829;GO:0005634;GO:0046872;GO:0046872;GO:0019957;GO:0019901;GO:0071889;GO:003592	BP:negative regulation of transcription from RNA polymerase II promoter;BP:regulation of tumor necrosis factor production;BP:positive regulation of nuclear-transcribed mRNA pol;BP:single-organism cellular process;BP:response to starvation;BP:3'-UTR-mediated mRNA stabilization;CC:cytoplasmic stress granule;CC:cytosol;CC:nucleus;MF:metal ion binding;MF:metal ion binding;MF:C-C chemokine binding;MF:…	ENSG00000128016	ZFP36	ZFP36 ring finger protein [Source:HGNC Symbol;Acc:HGNC:12862]	60.765	8.425
GO:0016239;GO:2001214;GO:0018108;GO:0035162;GO:0050927;GO:0046777;GO:0051894;GO:0038084;GO:0038083;GO:0003158;GO:0090141;GO:0045766;GO:0035584;GO:0051770;GO:0038033;GO:2000352;GO:0008360;GO:0014068;GO:0048010;GO:0010595;GO:0001938;GO:0030198;GO:0051901;GO:0002042;GO:0016032;GO:0070374;GO:0005783;GO:0005794;GO:0030054;GO:0005634;GO:0005576;GO:0016021;GO:0005887;GO:0045121;GO:0097443;GO:0005768;GO:…	BP:positive regulation of macroautophagy;BP:positive regulation of vasculogenesis;BP:peptidyl-tyrosine phosphorylation;BP:embryonic hemopoiesis;BP:positive regulation of positive chemotaxis;BP:protein autophosphorylation;BP:positive regulation of focal adhesion assembly;BP:vascular endothelial growth factor signaling pathway;BP:peptidyl-tyrosine autophosphorylation;BP:endothelium development;BP:p…	ENSG00000128052	KDR	kinase insert domain receptor [Source:HGNC Symbol;Acc:HGNC:6307]	17.03	51.435
GO:0007631;GO:0006468;GO:0007586;GO:0045776;GO:0045766;GO:0007189;GO:0010628;GO:0010628;GO:0006468;GO:0001525;GO:0045766;GO:0005576;GO:0005576;GO:0005576;GO:0005576;GO:0005179;GO:0032403;GO:0005179;GO:0005179;GO:003240	BP:feeding behavior;BP:protein phosphorylation;BP:digestion;BP:negative regulation of blood pressure;BP:positive regulation of angiogenesis;BP:adenylate cyclase-activating G-protein coupled receptor signaling pathway;BP:positive regulation of gene expression;BP:positive regulation of gene expression;BP:protein phosphorylation;BP:angiogenesis;BP:positive regulation of angiogenesis;CC:extracellular…	ENSG00000128165	ADM2	adrenomedullin 2 [Source:HGNC Symbol;Acc:HGNC:28898]	0.875	0.32
GO:0018193;GO:0018193;GO:0055114;GO:0055114;GO:0016021;GO:0016020;GO:0016021;GO:0016020;GO:0016020;GO:0051213;GO:0016491;GO:0046872;GO:0051213;GO:004687	BP:peptidyl-amino acid modification;BP:peptidyl-amino acid modification;BP:oxidation-reduction process;BP:oxidation-reduction process;CC:integral component of membrane;CC:membrane;CC:integral component of membrane;CC:membrane;CC:membrane;MF:dioxygenase activity;MF:oxidoreductase activity;MF:metal ion binding;MF:dioxygenase activity;MF:metal ion binding;	ENSG00000128203	ASPHD2	aspartate beta-hydroxylase domain containing 2 [Source:HGNC Symbol;Acc:HGNC:30437]	17.64	3.625
GO:0006954;GO:0006869;GO:0042157;GO:0043123;GO:0005737;GO:0016020;GO:0005576;GO:0005319;GO:0008289;GO:000487	BP:inflammatory response;BP:lipid transport;BP:lipoprotein metabolic process;BP:positive regulation of I-kappaB kinase/NF-kappaB signaling;CC:cytoplasm;CC:membrane;CC:extracellular region;MF:lipid transporter activity;MF:lipid binding;MF:signal transducer activity;	ENSG00000128284	APOL3	apolipoprotein L3 [Source:HGNC Symbol;Acc:HGNC:14868]	274.655	43.26
GO:0006869;GO:0006953;GO:0042157;GO:0060135;GO:0007275;GO:0008203;GO:0016021;GO:0005789;GO:0005576;GO:0008035;GO:0008289;GO:000510	BP:lipid transport;BP:acute-phase response;BP:lipoprotein metabolic process;BP:maternal process involved in female pregnancy;BP:multicellular organism development;BP:cholesterol metabolic process;CC:integral component of membrane;CC:endoplasmic reticulum membrane;CC:extracellular region;MF:high-density lipoprotein particle binding;MF:lipid binding;MF:receptor binding;	ENSG00000128335	APOL2	apolipoprotein L2 [Source:HGNC Symbol;Acc:HGNC:619]	447.81	43.285
GO:0048666;GO:0048711;GO:0006955;GO:0060041;GO:0033141;GO:0048861;GO:0048863;GO:0006955;GO:0008284;GO:0045944;GO:0007275;GO:0045944;GO:0008284;GO:0008284;GO:1900182;GO:0033141;GO:0033138;GO:0043410;GO:0050731;GO:0042531;GO:0046888;GO:0045651;GO:0048861;GO:0072108;GO:0072307;GO:1901676;GO:0060708;GO:0042517;GO:0045835;GO:0048644;GO:0060463;GO:0008284;GO:0008285;GO:0060426;GO:0031100;GO:0060707;GO:…	BP:neuron development;BP:positive regulation of astrocyte differentiation;BP:immune response;BP:retina development in camera-type eye;BP:positive regulation of peptidyl-serine phosphorylation of STAT protein;BP:leukemia inhibitory factor signaling pathway;BP:stem cell differentiation;BP:immune response;BP:positive regulation of cell proliferation;BP:positive regulation of transcription from RNA p…	ENSG00000128342	LIF	LIF, interleukin 6 family cytokine [Source:HGNC Symbol;Acc:HGNC:6596]	2.18	0.425
GO:0080111;GO:0016553;GO:0070383;GO:0045869;GO:0002230;GO:0009972;GO:0045087;GO:0010529;GO:0030895;GO:0000932;GO:0044822;GO:0016814;GO:0004126;GO:0008270;GO:000551	BP:DNA demethylation;BP:base conversion or substitution editing;BP:DNA cytosine deamination;BP:negative regulation of single stranded viral RNA replication via double stranded DNA intermediate;BP:positive regulation of defense response to virus by host;BP:cytidine deamination;BP:innate immune response;BP:negative regulation of transposition;CC:apolipoprotein B mRNA editing enzyme complex;CC:cytop…	ENSG00000128394	APOBEC3F	apolipoprotein B mRNA editing enzyme catalytic subunit 3F [Source:HGNC Symbol;Acc:HGNC:17356]	12.5	9.14
GO:0005634;GO:000551	CC:nucleus;MF:protein binding;	ENSG00000128408	RIBC2	RIB43A domain with coiled-coils 2 [Source:HGNC Symbol;Acc:HGNC:13241]	0.37	2.235
GO:0006469;GO:0046426;GO:0019221;GO:0050807;GO:0097119;GO:0005737;GO:0043197;GO:0016021;GO:0016021;GO:0016020;GO:0045211;GO:0060076;GO:0030054;GO:0004860;GO:000551	BP:negative regulation of protein kinase activity;BP:negative regulation of JAK-STAT cascade;BP:cytokine-mediated signaling pathway;BP:regulation of synapse organization;BP:postsynaptic density protein 95 clustering;CC:cytoplasm;CC:dendritic spine;CC:integral component of membrane;CC:integral component of membrane;CC:membrane;CC:postsynaptic membrane;CC:excitatory synapse;CC:cell junction;MF:prot…	ENSG00000128594	LRRC4	leucine rich repeat containing 4 [Source:HGNC Symbol;Acc:HGNC:15586]	0.18	0.605
GO:0006355;GO:0006351;GO:0006357;GO:0006355;GO:0019221;GO:0051607;GO:0051607;GO:0032495;GO:0032494;GO:0043065;GO:0060333;GO:0006357;GO:0045944;GO:0032728;GO:0032735;GO:0032727;GO:0019221;GO:0060337;GO:0005737;GO:0005634;GO:0005829;GO:0005634;GO:0003700;GO:0003677;GO:0000975;GO:0005515;GO:0000975;GO:000370	BP:regulation of transcription, DNA-templated;BP:transcription, DNA-templated;BP:regulation of transcription from RNA polymerase II promoter;BP:regulation of transcription, DNA-templated;BP:cytokine-mediated signaling pathway;BP:defense response to virus;BP:defense response to virus;BP:response to muramyl dipeptide;BP:response to peptidoglycan;BP:positive regulation of apoptotic process;BP:interf…	ENSG00000128604	IRF5	interferon regulatory factor 5 [Source:HGNC Symbol;Acc:HGNC:6120]	1.335	0.69
GO:0048706;GO:0030182;GO:0019233;GO:0006355;GO:0006351;GO:0006355;GO:0007275;GO:0048706;GO:0030182;GO:0009987;GO:0006355;GO:0019233;GO:0048731;GO:0005634;GO:0005654;GO:0005634;GO:0005634;GO:0043565;GO:0003677;GO:0003677;GO:0043565;GO:000367	BP:embryonic skeletal system development;BP:neuron differentiation;BP:sensory perception of pain;BP:regulation of transcription, DNA-templated;BP:transcription, DNA-templated;BP:regulation of transcription, DNA-templated;BP:multicellular organism development;BP:embryonic skeletal system development;BP:neuron differentiation;BP:cellular process;BP:regulation of transcription, DNA-templated;BP:sens…	ENSG00000128645	HOXD1	homeobox D1 [Source:HGNC Symbol;Acc:HGNC:5132]	16.105	9.32
GO:0006508;GO:0002949;GO:0000408;GO:0005739;GO:0004222;GO:0061711;GO:0016747;GO:004687	BP:proteolysis;BP:tRNA threonylcarbamoyladenosine modification;CC:EKC/KEOPS complex;CC:mitochondrion;MF:metalloendopeptidase activity;MF:;MF:transferase activity, transferring acyl groups other than amino-acyl groups;MF:metal ion binding;	ENSG00000128694	OSGEPL1	O-sialoglycoprotein endopeptidase like 1 [Source:HGNC Symbol;Acc:HGNC:23075]	0.395	2.645
GO:0016021;GO:0012505;GO:0019898;GO:000554	CC:integral component of membrane;CC:endomembrane system;CC:extrinsic component of membrane;MF:phospholipid binding;	ENSG00000128815	WDFY4	WDFY family member 4 [Source:HGNC Symbol;Acc:HGNC:29323]	15.44	3.15
GO:0070062;GO:0016459;GO:0003779;GO:0005516;GO:0003774;GO:000552	CC:extracellular exosome;CC:myosin complex;MF:actin binding;MF:calmodulin binding;MF:motor activity;MF:ATP binding;	ENSG00000128833	MYO5C	myosin VC [Source:HGNC Symbol;Acc:HGNC:7604]	1.04	2.935
GO:0006936;GO:0030239;GO:0051694;GO:0007611;GO:0045745;GO:0007270;GO:0051694;GO:0005865;GO:0005523;GO:000552	BP:muscle contraction;BP:myofibril assembly;BP:pointed-end actin filament capping;BP:learning or memory;BP:positive regulation of G-protein coupled receptor protein signaling pathway;BP:neuron-neuron synaptic transmission;BP:pointed-end actin filament capping;CC:striated muscle thin filament;MF:tropomyosin binding;MF:tropomyosin binding;	ENSG00000128872	TMOD2	tropomodulin 2 [Source:HGNC Symbol;Acc:HGNC:11872]	0.085	0.395
GO:0045945;GO:0042795;GO:0042796;GO:0008023;GO:0035363;GO:0035327;GO:0015030;GO:000551	BP:positive regulation of transcription from RNA polymerase III promoter;BP:snRNA transcription from RNA polymerase II promoter;BP:snRNA transcription from RNA polymerase III promoter;CC:transcription elongation factor complex;CC:histone locus body;CC:transcriptionally active chromatin;CC:Cajal body;MF:protein binding;	ENSG00000128915	ICE2	interactor of little elongation complex ELL subunit 2 [Source:HGNC Symbol;Acc:HGNC:29885]	3.365	6.15
GO:0060718;GO:0000122;GO:0008283;GO:0060707;GO:0070365;GO:0045944;GO:0032877;GO:0033301;GO:0032466;GO:0002040;GO:0005667;GO:0005634;GO:0001078;GO:0003714;GO:0001047;GO:0000978;GO:004280	BP:chorionic trophoblast cell differentiation;BP:negative regulation of transcription from RNA polymerase II promoter;BP:cell proliferation;BP:trophoblast giant cell differentiation;BP:hepatocyte differentiation;BP:positive regulation of transcription from RNA polymerase II promoter;BP:positive regulation of DNA endoreduplication;BP:cell cycle comprising mitosis without cytokinesis;BP:negative re…	ENSG00000129173	E2F8	E2F transcription factor 8 [Source:HGNC Symbol;Acc:HGNC:24727]	0.79	3.26
GO:0008033;GO:0001522;GO:0001522;GO:0009451;GO:0009982;GO:0003723;GO:0005515;GO:0003723;GO:000998	BP:tRNA processing;BP:pseudouridine synthesis;BP:pseudouridine synthesis;BP:RNA modification;MF:pseudouridine synthase activity;MF:RNA binding;MF:protein binding;MF:RNA binding;MF:pseudouridine synthase activity;	ENSG00000129317	PUS7L	pseudouridylate synthase 7 like [Source:HGNC Symbol;Acc:HGNC:25276]	0.855	1.675
GO:0015630;GO:0005615;GO:0016020;GO:0044444;GO:0044430;GO:004323	CC:microtubule cytoskeleton;CC:extracellular space;CC:membrane;CC:cytoplasmic part;CC:cytoskeletal part;CC:intracellular membrane-bounded organelle;	ENSG00000129422	MTUS1	microtubule associated scaffold protein 1 [Source:HGNC Symbol;Acc:HGNC:29789]	29.36	117.485
GO:0050709;GO:0016485;GO:0006508;GO:0042058;GO:0016021;GO:0005789;GO:0005886;GO:0004252;GO:001983	BP:negative regulation of protein secretion;BP:protein processing;BP:proteolysis;BP:regulation of epidermal growth factor receptor signaling pathway;CC:integral component of membrane;CC:endoplasmic reticulum membrane;CC:plasma membrane;MF:serine-type endopeptidase activity;MF:growth factor binding;	ENSG00000129667	RHBDF2	rhomboid 5 homolog 2 [Source:HGNC Symbol;Acc:HGNC:20788]	113.855	19.555
GO:0046785;GO:0000226;GO:0005737;GO:0005819;GO:0015629;GO:0005813;GO:0016020;GO:0005654;GO:0015630;GO:0008017;GO:000519	BP:microtubule polymerization;BP:microtubule cytoskeleton organization;CC:cytoplasm;CC:spindle;CC:actin cytoskeleton;CC:centrosome;CC:membrane;CC:nucleoplasm;CC:microtubule cytoskeleton;MF:microtubule binding;MF:structural molecule activity;	ENSG00000129680	MAP7D3	MAP7 domain containing 3 [Source:HGNC Symbol;Acc:HGNC:25742]	1.785	5.915
GO:0008612;GO:0055114;GO:0005829;GO:0019135;GO:0005515;GO:004687	BP:peptidyl-lysine modification to peptidyl-hypusine;BP:oxidation-reduction process;CC:cytosol;MF:deoxyhypusine monooxygenase activity;MF:protein binding;MF:metal ion binding;	ENSG00000129932	DOHH	deoxyhypusine hydroxylase [Source:HGNC Symbol;Acc:HGNC:28662]	32.155	19.69
GO:0006310;GO:0032199;GO:0090305;GO:0009036;GO:0003964;GO:004687	BP:DNA recombination;BP:reverse transcription involved in RNA-mediated transposition;BP:nucleic acid phosphodiester bond hydrolysis;MF:Type II site-specific deoxyribonuclease activity;MF:RNA-directed DNA polymerase activity;MF:metal ion binding;	ENSG00000130052	STARD8	StAR related lipid transfer domain containing 8 [Source:HGNC Symbol;Acc:HGNC:19161]	32.06	3.73
GO:0042127;GO:0009447;GO:0006596;GO:0001525;GO:0005622;GO:0005829;GO:0005515;GO:000414	BP:regulation of cell proliferation;BP:putrescine catabolic process;BP:polyamine biosynthetic process;BP:angiogenesis;CC:intracellular;CC:cytosol;MF:protein binding;MF:diamine N-acetyltransferase activity;	ENSG00000130066	SAT1	spermidine/spermine N1-acetyltransferase 1 [Source:HGNC Symbol;Acc:HGNC:10540]	792.125	254.565
GO:0046718;GO:0019064;GO:0034332;GO:0046596;GO:0007155;GO:0007165;GO:0051654;GO:0002891;GO:0042271;GO:0001675;GO:0030382;GO:0046814;GO:0008037;GO:0060370;GO:0007286;GO:0007289;GO:0007157;GO:0007156;GO:0044782;GO:0007010;GO:0032990;GO:0009566;GO:0002860;GO:0033005;GO:0005911;GO:0005886;GO:0005925;GO:0070062;GO:0016021;GO:0009986;GO:0005915;GO:0005887;GO:0050839;GO:0015026;GO:0042803;GO:0001618;GO:…	BP:viral entry into host cell;BP:fusion of virus membrane with host plasma membrane;BP:adherens junction organization;BP:regulation of viral entry into host cell;BP:cell adhesion;BP:signal transduction;BP:establishment of mitochondrion localization;BP:positive regulation of immunoglobulin mediated immune response;BP:susceptibility to natural killer cell mediated cytotoxicity;BP:acrosome assembly;…	ENSG00000130202	NECTIN2	nectin cell adhesion molecule 2 [Source:HGNC Symbol;Acc:HGNC:9707]	242.345	156.515
GO:0000185;GO:0051726;GO:0030154;GO:0046330;GO:0043065;GO:0006950;GO:1900745;GO:0007275;GO:0005737;GO:0005634;GO:000551	BP:activation of MAPKKK activity;BP:regulation of cell cycle;BP:cell differentiation;BP:positive regulation of JNK cascade;BP:positive regulation of apoptotic process;BP:response to stress;BP:positive regulation of p38MAPK cascade;BP:multicellular organism development;CC:cytoplasm;CC:nucleus;MF:protein binding;	ENSG00000130222	GADD45G	growth arrest and DNA damage inducible gamma [Source:HGNC Symbol;Acc:HGNC:4097]	2.305	0.64
GO:0007165;GO:000588	BP:signal transduction;CC:plasma membrane;	ENSG00000130224	LRCH2	leucine rich repeats and calponin homology domain containing 2 [Source:HGNC Symbol;Acc:HGNC:29292]	3.51	1.415
GO:003016	MF:PDZ domain binding;	ENSG00000130307	USHBP1	USH1 protein network component harmonin binding protein 1 [Source:HGNC Symbol;Acc:HGNC:24058]	1.54	3.97
GO:0001701;GO:0006878;GO:0045454;GO:0055114;GO:0001654;GO:0006825;GO:0006878;GO:0008535;GO:0014823;GO:0022904;GO:0008535;GO:0003012;GO:0001654;GO:0006825;GO:0005654;GO:0005743;GO:0005739;GO:0005739;GO:0005759;GO:0030016;GO:0030016;GO:0005743;GO:0005759;GO:0046872;GO:0005507;GO:0005515;GO:0005507;GO:0005515;GO:000550	BP:in utero embryonic development;BP:cellular copper ion homeostasis;BP:cell redox homeostasis;BP:oxidation-reduction process;BP:eye development;BP:copper ion transport;BP:cellular copper ion homeostasis;BP:respiratory chain complex IV assembly;BP:response to activity;BP:respiratory electron transport chain;BP:respiratory chain complex IV assembly;BP:muscle system process;BP:eye development;BP:co…	ENSG00000130489	SCO2	SCO2, cytochrome c oxidase assembly protein [Source:HGNC Symbol;Acc:HGNC:10604]	52.665	26.5
GO:0006508;GO:0006508;GO:0005829;GO:0005829;GO:0008234;GO:0016920;GO:0008233;GO:001692	BP:proteolysis;BP:proteolysis;CC:cytosol;CC:cytosol;MF:cysteine-type peptidase activity;MF:pyroglutamyl-peptidase activity;MF:peptidase activity;MF:pyroglutamyl-peptidase activity;	ENSG00000130517	PGPEP1	pyroglutamyl-peptidase I [Source:HGNC Symbol;Acc:HGNC:13568]	1.605	4.715
GO:0045944;GO:0044255;GO:0016020;GO:0005654;GO:0044822;GO:0030374;GO:0005515;GO:0003677;GO:0004386;GO:0046872;GO:000552	BP:positive regulation of transcription from RNA polymerase II promoter;BP:cellular lipid metabolic process;CC:membrane;CC:nucleoplasm;MF:pol;MF:ligand-dependent nuclear receptor transcription coactivator activity;MF:protein binding;MF:DNA binding;MF:helicase activity;MF:metal ion binding;MF:ATP binding;	ENSG00000130589	HELZ2	helicase with zinc finger 2 [Source:HGNC Symbol;Acc:HGNC:30021]	109.13	39.88
GO:0050852;GO:0006954;GO:0007155;GO:0005737;GO:0005634;GO:000551	BP:T cell receptor signaling pathway;BP:inflammatory response;BP:cell adhesion;CC:cytoplasm;CC:nucleus;MF:protein binding;	ENSG00000130775	THEMIS2	thymocyte selection associated family member 2 [Source:HGNC Symbol;Acc:HGNC:16839]	22.87	10.495
GO:0051607;GO:0034342;GO:0045071;GO:0034340;GO:0034341;GO:0005737;GO:0005634;GO:0003723;GO:000551	BP:defense response to virus;BP:response to type III interferon;BP:negative regulation of viral genome replication;BP:response to type I interferon;BP:response to interferon-gamma;CC:cytoplasm;CC:nucleus;MF:RNA binding;MF:protein binding;	ENSG00000130813	C19orf66	chromosome 19 open reading frame 66 [Source:HGNC Symbol;Acc:HGNC:25649]	88.06	40.44
GO:0006355;GO:0007275;GO:0005737;GO:0005654;GO:0003677;GO:004687	BP:regulation of transcription, DNA-templated;BP:multicellular organism development;CC:cytoplasm;CC:nucleoplasm;MF:DNA binding;MF:metal ion binding;	ENSG00000130940	CASZ1	castor zinc finger 1 [Source:HGNC Symbol;Acc:HGNC:26002]	5.66	1.36
GO:0007030;GO:0090286;GO:0090292;GO:0040023;GO:0042692;GO:0005856;GO:0005794;GO:0016021;GO:0005640;GO:0030017;GO:0005654;GO:0045211;GO:0034993;GO:0051015;GO:0005521;GO:0044822;GO:004280	BP:Golgi organization;BP:cytoskeletal anchoring at nuclear membrane;BP:nuclear matrix anchoring at nuclear membrane;BP:establishment of nucleus localization;BP:muscle cell differentiation;CC:cytoskeleton;CC:Golgi apparatus;CC:integral component of membrane;CC:nuclear outer membrane;CC:sarcomere;CC:nucleoplasm;CC:postsynaptic membrane;CC:LINC complex;MF:actin filament binding;MF:lamin binding;MF:p…	ENSG00000131018	SYNE1	spectrin repeat containing nuclear envelope protein 1 [Source:HGNC Symbol;Acc:HGNC:17089]	3.79	16.23
GO:0042130;GO:0046006;GO:0034276;GO:0070233;GO:0002830;GO:0070234;GO:0032496;GO:0002534;GO:0019441;GO:0002666;GO:0032693;GO:0002678;GO:0036269;GO:0055114;GO:0007565;GO:0033555;GO:0032735;GO:0030485;GO:0032421;GO:0005829;GO:0004833;GO:0046872;GO:0033754;GO:0020037;GO:000905	BP:negative regulation of T cell proliferation;BP:regulation of activated T cell proliferation;BP:kynurenic acid biosynthetic process;BP:negative regulation of T cell apoptotic process;BP:positive regulation of type 2 immune response;BP:positive regulation of T cell apoptotic process;BP:response to lipopolysaccharide;BP:cytokine production involved in inflammatory response;BP:tryptophan catabolic…	ENSG00000131203	IDO1	indoleamine 2,3-dioxygenase 1 [Source:HGNC Symbol;Acc:HGNC:6059]	382.1	2.95
GO:0043330;GO:0050852;GO:0050853;GO:0040007;GO:0034138;GO:0033227;GO:0032620;GO:0001765;GO:0002457;GO:0032596;GO:0043234;GO:0045121;GO:0005886;GO:0005768;GO:0070062;GO:000372	BP:response to exogenous dsRNA;BP:T cell receptor signaling pathway;BP:B cell receptor signaling pathway;BP:growth;BP:toll-like receptor 3 signaling pathway;BP:dsRNA transport;BP:interleukin-17 production;BP:membrane raft assembly;BP:T cell antigen processing and presentation;BP:protein transport into membrane raft;CC:protein complex;CC:membrane raft;CC:plasma membrane;CC:endosome;CC:extracellula…	ENSG00000131378	RFTN1	raftlin, lipid raft linker 1 [Source:HGNC Symbol;Acc:HGNC:30278]	47.02	23.635
GO:0016266;GO:0006486;GO:0016021;GO:0000139;GO:0030133;GO:0004653;GO:0030246;GO:0016757;GO:004687	BP:O-glycan processing;BP:protein glycosylation;CC:integral component of membrane;CC:Golgi membrane;CC:transport vesicle;MF:polypeptide N-acetylgalactosaminyltransferase activity;MF:carbohydrate binding;MF:transferase activity, transferring glycosyl groups;MF:metal ion binding;	ENSG00000131386	GALNT15	polypeptide N-acetylgalactosaminyltransferase 15 [Source:HGNC Symbol;Acc:HGNC:21531]	0.66	3.015
GO:0006048;GO:0005975;GO:1901137;GO:0006541;GO:0006112;GO:0006002;GO:0005829;GO:0004360;GO:0030246;GO:0008483;GO:000551	BP:UDP-N-acetylglucosamine biosynthetic process;BP:carbohydrate metabolic process;BP:carbohydrate derivative biosynthetic process;BP:glutamine metabolic process;BP:energy reserve metabolic process;BP:fructose 6-phosphate metabolic process;CC:cytosol;MF:glutamine-fructose-6-phosphate transaminas;MF:carbohydrate binding;MF:transaminase activity;MF:protein binding;	ENSG00000131459	GFPT2	glutamine-fructose-6-phosphate transaminase 2 [Source:HGNC Symbol;Acc:HGNC:4242]	18.78	4.15
GO:001602	CC:membrane;	ENSG00000131591	C1orf159	chromosome 1 open reading frame 159 [Source:HGNC Symbol;Acc:HGNC:26062]	14.835	8.25
GO:0030947;GO:0048856;GO:0001945;GO:0044767;GO:0051145;GO:0044763;GO:0016020;GO:0016021;GO:0005912;GO:0005886;GO:0005886;GO:0016021;GO:0016020;GO:0030054;GO:000591	BP:regulation of vascular endothelial growth factor receptor signaling pathway;BP:anatomical structure development;BP:lymph vessel development;BP:single-organism developmental process;BP:smooth muscle cell differentiation;BP:single-organism cellular process;CC:membrane;CC:integral component of membrane;CC:adherens junction;CC:plasma membrane;CC:plasma membrane;CC:integral component of membrane;CC…	ENSG00000131634	TMEM204	transmembrane protein 204 [Source:HGNC Symbol;Acc:HGNC:14158]	5.105	17.34
GO:0007399;GO:0001954;GO:0042246;GO:1990384;GO:0016021;GO:000551	BP:nervous system development;BP:positive regulation of cell-matrix adhesion;BP:tissue regeneration;BP:hyaloid vascular plexus regression;CC:integral component of membrane;MF:protein binding;	ENSG00000131669	NINJ1	ninjurin 1 [Source:HGNC Symbol;Acc:HGNC:7824]	343.3	53.725
GO:0048468;GO:0009653;GO:0048384;GO:0032736;GO:0045787;GO:0030853;GO:0071391;GO:0006367;GO:0032720;GO:0008284;GO:0006468;GO:0048608;GO:0060429;GO:0032753;GO:0044702;GO:0045892;GO:0043277;GO:0044703;GO:0051216;GO:0007399;GO:0051099;GO:0071300;GO:0045944;GO:0032689;GO:0045630;GO:0032754;GO:0015629;GO:0005737;GO:0005654;GO:0097458;GO:0009986;GO:0000790;GO:0031490;GO:0051393;GO:0044323;GO:0043422;GO:…	BP:cell development;BP:anatomical structure morphogenesis;BP:retinoic acid receptor signaling pathway;BP:positive regulation of interleukin-13 production;BP:positive regulation of cell cycle;BP:negative regulation of granulocyte differentiation;BP:cellular response to estrogen stimulus;BP:transcription initiation from RNA polymerase II promoter;BP:negative regulation of tumor necrosis factor prod…	ENSG00000131759	RARA	retinoic acid receptor alpha [Source:HGNC Symbol;Acc:HGNC:9864]	4.62	18.38
GO:0005783;GO:0005739;GO:0044446;GO:0044444;GO:0044425;GO:004323	CC:endoplasmic reticulum;CC:mitochondrion;CC:intracellular organelle part;CC:cytoplasmic part;CC:membrane part;CC:intracellular membrane-bounded organelle;	ENSG00000131943	C19orf12	chromosome 19 open reading frame 12 [Source:HGNC Symbol;Acc:HGNC:25443]	21.435	10.21
GO:0035998;GO:0014916;GO:0051000;GO:0042311;GO:0032496;GO:0046654;GO:0048265;GO:0050884;GO:0051260;GO:0006809;GO:0006729;GO:0051291;GO:0034612;GO:0034341;GO:0042416;GO:2000121;GO:0045776;GO:0008217;GO:0005737;GO:0031410;GO:0005654;GO:0031965;GO:0043234;GO:0005829;GO:0003934;GO:0008270;GO:0050662;GO:0030742;GO:0005509;GO:0042803;GO:000552	BP:7,8-dihydroneopterin 3'-triphosphate biosynthetic process;BP:regulation of lung blood pressure;BP:positive regulation of nitric-oxide synthase activity;BP:vasodilation;BP:response to lipopolysaccharide;BP:tetrahydrofolate biosynthetic process;BP:response to pain;BP:neuromuscular process controlling posture;BP:protein homooligomerization;BP:nitric oxide biosynthetic process;BP:tetrahydrobiopter…	ENSG00000131979	GCH1	GTP cyclohydrolase 1 [Source:HGNC Symbol;Acc:HGNC:4193]	59.615	3.63
GO:000827	MF:zinc ion binding;	ENSG00000132003	ZSWIM4	zinc finger SWIM-type containing 4 [Source:HGNC Symbol;Acc:HGNC:25704]	14.39	8.89
GO:0090086;GO:1902187;GO:0032088;GO:0000209;GO:0046598;GO:0045787;GO:0016567;GO:0010508;GO:0070206;GO:0060333;GO:0032897;GO:0051091;GO:0031648;GO:0006513;GO:0051865;GO:0032479;GO:0031410;GO:0005634;GO:0005776;GO:0005829;GO:0000932;GO:0005622;GO:0019005;GO:0008270;GO:0003677;GO:0042802;GO:0003723;GO:0004842;GO:001687	BP:negative regulation of protein deubiquitination;BP:negative regulation of viral release from host cell;BP:negative regulation of NF-kappaB transcription factor activity;BP:protein polyubiquitination;BP:positive regulation of viral entry into host cell;BP:positive regulation of cell cycle;BP:protein ubiquitination;BP:positive regulation of autophagy;BP:protein trimerization;BP:interferon-gamma-…	ENSG00000132109	TRIM21	tripartite motif containing 21 [Source:HGNC Symbol;Acc:HGNC:11312]	113.86	33.115
GO:000552	MF:ATP binding;	ENSG00000132321	IQCA1	IQ motif containing with AAA domain 1 [Source:HGNC Symbol;Acc:HGNC:26195]	4.755	2.07
GO:0006796;GO:0043169;GO:0005515;GO:0004721;GO:000382	BP:phosphate-containing compound metabolic process;MF:cation binding;MF:protein binding;MF:phosphoprotein phosphatase activity;MF:catalytic activity;	ENSG00000132323	ILKAP	ILK associated serine/threonine phosphatase [Source:HGNC Symbol;Acc:HGNC:15566]	29.145	19.11
GO:0046627;GO:0033003;GO:0035335;GO:0007185;GO:0005737;GO:0016021;GO:0005886;GO:0005634;GO:0005001;GO:004280	BP:negative regulation of insulin receptor signaling pathway;BP:regulation of mast cell activation;BP:peptidyl-tyrosine dephosphorylation;BP:transmembrane receptor protein tyrosine phosphatase signaling pathway;CC:cytoplasm;CC:integral component of membrane;CC:plasma membrane;CC:nucleus;MF:transmembrane receptor protein tyrosine phosphatase activity;MF:protein homodimerization activity;	ENSG00000132334	PTPRE	protein tyrosine phosphatase, receptor type E [Source:HGNC Symbol;Acc:HGNC:9669]	7.52	29.47
GO:0043065;GO:0000398;GO:0016445;GO:0005737;GO:0005654;GO:0016020;GO:0000974;GO:0005681;GO:001989	BP:positive regulation of apoptotic process;BP:mRNA splicing, via spliceosome;BP:somatic diversification of immunoglobulins;CC:cytoplasm;CC:nucleoplasm;CC:membrane;CC:Prp19 complex;CC:spliceosomal complex;MF:enzyme binding;	ENSG00000132792	CTNNBL1	catenin beta like 1 [Source:HGNC Symbol;Acc:HGNC:15879]	44.98	25.76
GO:0046827;GO:0005737;GO:000565	BP:positive regulation of protein export from nucleus;CC:cytoplasm;CC:nucleoplasm;	ENSG00000132953	XPO4	exportin 4 [Source:HGNC Symbol;Acc:HGNC:17796]	1.455	4.09
GO:0030032;GO:0030036;GO:0031643;GO:0014003;GO:0008360;GO:0030041;GO:0005856;GO:0005737;GO:0070062;GO:0030027;GO:000377	BP:lamellipodium assembly;BP:actin cytoskeleton organization;BP:positive regulation of myelination;BP:oligodendrocyte development;BP:regulation of cell shape;BP:actin filament polymerization;CC:cytoskeleton;CC:cytoplasm;CC:extracellular exosome;CC:lamellipodium;MF:actin binding;	ENSG00000132970	WASF3	WAS protein family member 3 [Source:HGNC Symbol;Acc:HGNC:12734]	3.515	9.745
GO:0016459;GO:0051015;GO:0005524;GO:000377	CC:myosin complex;MF:actin filament binding;MF:ATP binding;MF:motor activity;	ENSG00000133026	MYH10	myosin heavy chain 10 [Source:HGNC Symbol;Acc:HGNC:7568]	20.915	62.62
GO:001602	CC:membrane;	ENSG00000133069	TMCC2	transmembrane and coiled-coil domain family 2 [Source:HGNC Symbol;Acc:HGNC:24239]	5.33	1.42
GO:0070588;GO:0051924;GO:0048709;GO:0014051;GO:0051480;GO:0070509;GO:0006828;GO:0043234;GO:0005887;GO:0030863;GO:0016021;GO:0016323;GO:0034704;GO:0005911;GO:0005901;GO:0009986;GO:0015279;GO:0008013;GO:0005262;GO:0045296;GO:007067	BP:calcium ion transmembrane transport;BP:regulation of calcium ion transport;BP:oligodendrocyte differentiation;BP:gamma-aminobutyric acid secretion;BP:regulation of cytosolic calcium ion concentration;BP:calcium ion import;BP:manganese ion transport;CC:protein complex;CC:integral component of plasma membrane;CC:cortical cytoskeleton;CC:integral component of membrane;CC:basolateral plasma membra…	ENSG00000133107	TRPC4	transient receptor potential cation channel subfamily C member 4 [Source:HGNC Symbol;Acc:HGNC:12336]	0.05	0.51
GO:0031334;GO:2000781;GO:1990166;GO:0034184;GO:0005737;GO:0005813;GO:0042405;GO:0000786;GO:0035861;GO:0031625;GO:003240	BP:positive regulation of protein complex assembly;BP:positive regulation of double-strand break repair;BP:protein localization to site of double-strand break;BP:positive regulation of maintenance of mitotic sister chromatid cohesion;CC:cytoplasm;CC:centrosome;CC:nuclear inclusion body;CC:nucleosome;CC:site of double-strand break;MF:ubiquitin protein ligase binding;MF:protein complex binding;	ENSG00000133302	SLF1	SMC5-SMC6 complex localization factor 1 [Source:HGNC Symbol;Acc:HGNC:25408]	0.815	1.195
GO:0000096;GO:0008152;GO:0006750;GO:0006508;GO:0005737;GO:0070062;GO:0005829;GO:0005654;GO:0016787;GO:0016805;GO:0004180;GO:0034701;GO:0102008;GO:0046872;GO:000823	BP:sulfur amino acid metabolic process;BP:metabolic process;BP:glutathione biosynthetic process;BP:proteolysis;CC:cytoplasm;CC:extracellular exosome;CC:cytosol;CC:nucleoplasm;MF:hydrolase activity;MF:dipeptidase activity;MF:carboxypeptidase activity;MF:tripeptidase activity;MF:cytosolic dipeptidase activity;MF:metal ion binding;MF:metallopeptidase activity;	ENSG00000133313	CNDP2	carnosine dipeptidase 2 [Source:HGNC Symbol;Acc:HGNC:24437]	168.065	71.16
GO:0008285;GO:0006644;GO:0009987;GO:0016042;GO:0044699;GO:0016020;GO:0016021;GO:0005515;GO:000462	BP:negative regulation of cell proliferation;BP:phospholipid metabolic process;BP:cellular process;BP:lipid catabolic process;BP:single-organism process;CC:membrane;CC:integral component of membrane;MF:protein binding;MF:phospholipase A2 activity;	ENSG00000133321	RARRES3	retinoic acid receptor responder 3 [Source:HGNC Symbol;Acc:HGNC:9869]	134.85	5.21
GO:0007067;GO:0051301;GO:0005654;GO:000581	BP:mitotic nuclear division;BP:cell division;CC:nucleoplasm;CC:centriole;	ENSG00000133739	LRRCC1	leucine rich repeat and coiled-coil centrosomal protein 1 [Source:HGNC Symbol;Acc:HGNC:29373]	0.275	0.84
GO:0032233;GO:0045190;GO:0030835;GO:1902309;GO:0007204;GO:0060754;GO:0033633;GO:0032880;GO:0005856;GO:0030027;GO:0005829;GO:0005886;GO:0005634;GO:0005509;GO:0005515;GO:0003677;GO:000552	BP:positive regulation of actin filament bundle assembly;BP:isotype switching;BP:negative regulation of actin filament depolymerization;BP:negative regulation of peptidyl-serine dephosphorylation;BP:positive regulation of cytosolic calcium ion concentration;BP:positive regulation of mast cell chemotaxis;BP:negative regulation of cell-cell adhesion mediated by integrin;BP:regulation of protein loc…	ENSG00000133789	SWAP70	SWAP switching B-cell complex subunit 70 [Source:HGNC Symbol;Acc:HGNC:17070]	11.45	32.38
GO:0030214;GO:0009611;GO:0006928;GO:0007160;GO:0009653;GO:0070062;GO:0016020;GO:0005887;GO:0005515;GO:000487	BP:hyaluronan catabolic process;BP:response to wounding;BP:movement of cell or subcellular component;BP:cell-matrix adhesion;BP:anatomical structure morphogenesis;CC:extracellular exosome;CC:membrane;CC:integral component of plasma membrane;MF:protein binding;MF:receptor activity;	ENSG00000133800	LYVE1	lymphatic vessel endothelial hyaluronan receptor 1 [Source:HGNC Symbol;Acc:HGNC:14687]	0.785	4.53
GO:0000187;GO:0051092;GO:0043433;GO:0031663;GO:0007165;GO:0006468;GO:0006954;GO:0002755;GO:0035556;GO:0006468;GO:0006954;GO:0002224;GO:0002755;GO:0002756;GO:0007249;GO:0051092;GO:0007254;GO:0051092;GO:0070423;GO:0000187;GO:0001959;GO:0001959;GO:0002755;GO:0007249;GO:0007249;GO:0032088;GO:0034162;GO:0070498;GO:0070498;GO:0070555;GO:0007249;GO:0007165;GO:0070498;GO:0035556;GO:0007254;GO:0002224;GO:…	BP:activation of MAPK activity;BP:positive regulation of NF-kappaB transcription factor activity;BP:negative regulation of sequence-specific DNA binding transcription factor activity;BP:lipopolysaccharide-mediated signaling pathway;BP:signal transduction;BP:protein phosphorylation;BP:inflammatory response;BP:MyD88-dependent toll-like receptor signaling pathway;BP:intracellular signal transduction…	ENSG00000134070	IRAK2	interleukin 1 receptor associated kinase 2 [Source:HGNC Symbol;Acc:HGNC:6113]	11.43	4.88
GO:0005737;GO:0005730;GO:000372	CC:cytoplasm;CC:nucleolus;MF:RNA binding;	ENSG00000134077	THUMPD3	THUMP domain containing 3 [Source:HGNC Symbol;Acc:HGNC:24493]	2.755	11.44
GO:0030154;GO:0046579;GO:0007275;GO:0007219;GO:0016049;GO:0001709;GO:0043066;GO:0006367;GO:0061314;GO:0008285;GO:0050793;GO:0007050;GO:0030522;GO:0019827;GO:0007399;GO:0042246;GO:0006355;GO:0003184;GO:0046849;GO:0060413;GO:0002315;GO:0005789;GO:0005737;GO:0005654;GO:0043235;GO:0009986;GO:0005887;GO:0000139;GO:0005576;GO:0038049;GO:0005509;GO:000551	BP:cell differentiation;BP:positive regulation of Ras protein signal transduction;BP:multicellular organism development;BP:Notch signaling pathway;BP:cell growth;BP:cell fate determination;BP:negative regulation of apoptotic process;BP:transcription initiation from RNA polymerase II promoter;BP:Notch signaling involved in heart development;BP:negative regulation of cell proliferation;BP:regulatio…	ENSG00000134250	NOTCH2	notch 2 [Source:HGNC Symbol;Acc:HGNC:7882]	13.395	8.665
GO:0060348;GO:0005737;GO:0005654;GO:0045171;GO:000827	BP:bone development;CC:cytoplasm;CC:nucleoplasm;CC:intercellular bridge;MF:zinc ion binding;	ENSG00000134253	TRIM45	tripartite motif containing 45 [Source:HGNC Symbol;Acc:HGNC:19018]	0.115	1.365
GO:0007264;GO:0007264;GO:0005622;GO:0005622;GO:0005525;GO:0000166;GO:0005525;GO:000552	BP:small GTPase mediated signal transduction;BP:small GTPase mediated signal transduction;CC:intracellular;CC:intracellular;MF:GTP binding;MF:nucleotide binding;MF:GTP binding;MF:GTP binding;	ENSG00000134287	ARF3	ADP ribosylation factor 3 [Source:HGNC Symbol;Acc:HGNC:654]	151.165	79.5
GO:0006235;GO:0006233;GO:0006227;GO:0006165;GO:0071222;GO:0005829;GO:0005654;GO:0005739;GO:0004798;GO:0033862;GO:0004127;GO:0004550;GO:000552	BP:dTTP biosynthetic process;BP:dTDP biosynthetic process;BP:dUDP biosynthetic process;BP:nucleoside diphosphate phosphorylation;BP:cellular response to lipopolysaccharide;CC:cytosol;CC:nucleoplasm;CC:mitochondrion;MF:thymidylate kinase activity;MF:UMP kinase activity;MF:cytidylate kinase activity;MF:nucleoside diphosphate kinase activity;MF:ATP binding;	ENSG00000134326	CMPK2	cytidine/uridine monophosphate kinase 2 [Source:HGNC Symbol;Acc:HGNC:27015]	45.13	17.17
GO:0008283;GO:0019221;GO:0005615;GO:0005789;GO:0016021;GO:0031965;GO:0000139;GO:0030659;GO:0005886;GO:0005515;GO:000489	BP:cell proliferation;BP:cytokine-mediated signaling pathway;CC:extracellular space;CC:endoplasmic reticulum membrane;CC:integral component of membrane;CC:nuclear membrane;CC:Golgi membrane;CC:cytoplasmic vesicle membrane;CC:plasma membrane;MF:protein binding;MF:cytokine receptor activity;	ENSG00000134470	IL15RA	interleukin 15 receptor subunit alpha [Source:HGNC Symbol;Acc:HGNC:5978]	147.34	25.525
GO:0045892;GO:0051260;GO:0005634;GO:0008134;GO:000371	BP:negative regulation of transcription, DNA-templated;BP:protein homooligomerization;CC:nucleus;MF:transcription factor binding;MF:transcription corepressor activity;	ENSG00000134504	KCTD1	potassium channel tetramerization domain containing 1 [Source:HGNC Symbol;Acc:HGNC:18249]	1.055	3.815
GO:0051301;GO:0051726;GO:0005829;GO:0005634;GO:000551	BP:cell division;BP:regulation of cell cycle;CC:cytosol;CC:nucleus;MF:protein binding;	ENSG00000134508	CABLES1	Cdk5 and Abl enzyme substrate 1 [Source:HGNC Symbol;Acc:HGNC:25097]	3.395	21
GO:0046633;GO:0030036;GO:0001766;GO:0001768;GO:0050766;GO:0045059;GO:0043547;GO:0006935;GO:0050690;GO:0001771;GO:0007264;GO:0045060;GO:0002277;GO:0044351;GO:0016020;GO:0005856;GO:0012505;GO:0070062;GO:0005829;GO:0005622;GO:0042608;GO:0005085;GO:0005096;GO:003067	BP:alpha-beta T cell proliferation;BP:actin cytoskeleton organization;BP:membrane raft polarization;BP:establishment of T cell polarity;BP:positive regulation of phagocytosis;BP:positive thymic T cell selection;BP:positive regulation of GTPase activity;BP:chemotaxis;BP:regulation of defense response to virus by virus;BP:immunological synapse formation;BP:small GTPase mediated signal transduction;…	ENSG00000134516	DOCK2	dedicator of cytokinesis 2 [Source:HGNC Symbol;Acc:HGNC:2988]	0.205	2.015
GO:0050776;GO:0002228;GO:0007166;GO:0043235;GO:0009897;GO:0016021;GO:0030246;GO:0004888;GO:0023024;GO:1990405;GO:002303	BP:regulation of immune response;BP:natural killer cell mediated immunity;BP:cell surface receptor signaling pathway;CC:receptor complex;CC:external side of plasma membrane;CC:integral component of membrane;MF:carbohydrate binding;MF:transmembrane signaling receptor activity;MF:MHC class I protein complex binding;MF:protein antigen binding;MF:MHC class Ib protein binding, via antigen binding groo…	ENSG00000134539	KLRD1	killer cell lectin like receptor D1 [Source:HGNC Symbol;Acc:HGNC:6378]	0.3	0.01
GO:0051124;GO:0030509;GO:1904395;GO:0001822;GO:0097105;GO:0097104;GO:0090090;GO:0009953;GO:0030279;GO:0042733;GO:0009954;GO:0050771;GO:0050731;GO:1901631;GO:0001942;GO:0042475;GO:0031594;GO:0016021;GO:0009986;GO:0005886;GO:0030971;GO:0005509;GO:004280	BP:synaptic growth at neuromuscular junction;BP:BMP signaling pathway;BP:positive regulation of skeletal muscle acetylcholine-gated channel clustering;BP:kidney development;BP:presynaptic membrane assembly;BP:postsynaptic membrane assembly;BP:negative regulation of canonical Wnt signaling pathway;BP:dorsal/ventral pattern formation;BP:negative regulation of ossification;BP:embryonic digit morphog…	ENSG00000134569	LRP4	LDL receptor related protein 4 [Source:HGNC Symbol;Acc:HGNC:6696]	1.52	0.635
GO:0010923;GO:000635	BP:negative regulation of phosphatase activity;BP:transcription, DNA-templated;	ENSG00000134668	SPOCD1	SPOC domain containing 1 [Source:HGNC Symbol;Acc:HGNC:26338]	51.675	26.06
GO:2000249;GO:0048146;GO:0018108;GO:0048557;GO:0050920;GO:0035790;GO:0060326;GO:0010863;GO:0046777;GO:0043547;GO:0010544;GO:0045740;GO:0046854;GO:0030335;GO:2000739;GO:0048701;GO:0034614;GO:0014068;GO:0001553;GO:0061298;GO:0072277;GO:0043552;GO:0038091;GO:0055003;GO:0007204;GO:0016032;GO:0070374;GO:0070527;GO:0005634;GO:0005737;GO:0005887;GO:0043234;GO:0005088;GO:0005161;GO:0005021;GO:0038085;GO:…	BP:regulation of actin cytoskeleton reorganization;BP:positive regulation of fibroblast proliferation;BP:peptidyl-tyrosine phosphorylation;BP:embryonic digestive tract morphogenesis;BP:regulation of chemotaxis;BP:platelet-derived growth factor receptor-alpha signaling pathway;BP:cell chemotaxis;BP:positive regulation of phospholipase C activity;BP:protein autophosphorylation;BP:positive regulatio…	ENSG00000134853	PDGFRA	platelet derived growth factor receptor alpha [Source:HGNC Symbol;Acc:HGNC:8803]	3.75	0.635
GO:0006355;GO:0005634;GO:0003700;GO:004356	BP:regulation of transcription, DNA-templated;CC:nucleus;MF:transcription factor activity, sequence-specific DNA binding;MF:sequence-specific DNA binding;	ENSG00000134954	ETS1	ETS proto-oncogene 1, transcription factor [Source:HGNC Symbol;Acc:HGNC:3488]	49.375	27.485
GO:0072593;GO:0016310;GO:0006915;GO:0009398;GO:0033864;GO:0009231;GO:0005829;GO:0005739;GO:0008531;GO:0046872;GO:000552	BP:reactive oxygen species metabolic process;BP:phosphorylation;BP:apoptotic process;BP:FMN biosynthetic process;BP:positive regulation of NA;BP:riboflavin biosynthetic process;CC:cytosol;CC:mitochondrion;MF:riboflavin kinase activity;MF:metal ion binding;MF:ATP binding;	ENSG00000135002	RFK	riboflavin kinase [Source:HGNC Symbol;Acc:HGNC:30324]	6.955	20.17
GO:0007275;GO:0016021;GO:007006	BP:multicellular organism development;CC:integral component of membrane;CC:extracellular exosome;	ENSG00000135048	TMEM2	transmembrane protein 2 [Source:HGNC Symbol;Acc:HGNC:11869]	79.93	35.24
GO:000563	CC:nucleus;	ENSG00000135083	CCNJL	cyclin J like [Source:HGNC Symbol;Acc:HGNC:25876]	3.185	10.645
GO:0051607;GO:0045071;GO:0060333;GO:0060337;GO:0051607;GO:0005730;GO:0005829;GO:0016020;GO:0046966;GO:0003725;GO:0003677;GO:0003725;GO:0001730;GO:0044822;GO:000552	BP:defense response to virus;BP:negative regulation of viral genome replication;BP:interferon-gamma-mediated signaling pathway;BP:type I interferon signaling pathway;BP:defense response to virus;CC:nucleolus;CC:cytosol;CC:membrane;MF:thyroid hormone receptor binding;MF:double-stranded RNA binding;MF:DNA binding;MF:double-stranded RNA binding;MF:2'-5'-oligoadenylate synthetase activity;MF:pol;MF:A…	ENSG00000135114	OASL	2'-5'-oligoadenylate synthetase like [Source:HGNC Symbol;Acc:HGNC:8090]	82.73	14.625
GO:0042118;GO:0007596;GO:0019228;GO:0051899;GO:0008217;GO:0033198;GO:0071318;GO:0051260;GO:0019233;GO:0002028;GO:0050850;GO:0097190;GO:0010524;GO:0055119;GO:0001894;GO:0055117;GO:0010614;GO:0045429;GO:0035590;GO:0006811;GO:0098655;GO:0060079;GO:0033198;GO:0035590;GO:0034405;GO:0098655;GO:0032308;GO:0030054;GO:0070062;GO:0005639;GO:0048471;GO:0043025;GO:0014069;GO:0005887;GO:0043195;GO:0043197;GO:…	BP:endothelial cell activation;BP:blood coagulation;BP:neuronal action potential;BP:membrane depolarization;BP:regulation of blood pressure;BP:response to ATP;BP:cellular response to ATP;BP:protein homooligomerization;BP:sensory perception of pain;BP:regulation of sodium ion transport;BP:positive regulation of calcium-mediated signaling;BP:apoptotic signaling pathway;BP:positive regulation of cal…	ENSG00000135124	P2RX4	purinergic receptor P2X 4 [Source:HGNC Symbol;Acc:HGNC:8535]	222.055	112.56
GO:0045824;GO:0034097;GO:0046872;GO:000551	BP:negative regulation of innate immune response;BP:response to cytokine;MF:metal ion binding;MF:protein binding;	ENSG00000135148	TRAFD1	TRAF-type zinc finger domain containing 1 [Source:HGNC Symbol;Acc:HGNC:24808]	214.93	22.4
GO:0007631;GO:0051385;GO:0042756;GO:0035690;GO:0042310;GO:0014059;GO:0071502;GO:0051967;GO:0051385;GO:0046849;GO:0045471;GO:0042756;GO:0042493;GO:0042220;GO:0032229;GO:0014063;GO:0014059;GO:0007631;GO:0007268;GO:0007205;GO:0002031;GO:0007165;GO:0007186;GO:0007186;GO:0042310;GO:0007268;GO:0050795;GO:0098664;GO:0007631;GO:0046849;GO:0030818;GO:0035690;GO:0007268;GO:1904707;GO:0007187;GO:0007198;GO:…	BP:feeding behavior;BP:response to mineralocorticoid;BP:drinking behavior;BP:cellular response to drug;BP:vasoconstriction;BP:regulation of dopamine secretion;BP:cellular response to temperature stimulus;BP:negative regulation of synaptic transmission, glutamatergic;BP:response to mineralocorticoid;BP:bone remodeling;BP:response to ethanol;BP:drinking behavior;BP:response to drug;BP:response to c…	ENSG00000135312	HTR1B	5-hydroxytryptamine receptor 1B [Source:HGNC Symbol;Acc:HGNC:5287]	13.685	42.48
GO:0015031;GO:0005737;GO:0005929;GO:0005815;GO:003240	BP:protein transport;CC:cytoplasm;CC:cilium;CC:microtubule organizing center;MF:protein complex binding;	ENSG00000135338	LCA5	LCA5, lebercilin [Source:HGNC Symbol;Acc:HGNC:31923]	0.29	0.82
GO:0008150;GO:0016021;GO:0005576;GO:0005576;GO:0016021;GO:0016021;GO:0016020;GO:0005509;GO:0005509;GO:000367	BP:biological_process;CC:integral component of membrane;CC:extracellular region;CC:extracellular region;CC:integral component of membrane;CC:integral component of membrane;CC:membrane;MF:calcium ion binding;MF:calcium ion binding;MF:molecular_function;	ENSG00000135378	PRRG4	proline rich and Gla domain 4 [Source:HGNC Symbol;Acc:HGNC:30799]	0.41	0.07
GO:0018107;GO:0030308;GO:0032927;GO:0000082;GO:0097191;GO:0010629;GO:0010628;GO:0010862;GO:0046777;GO:0023014;GO:0007417;GO:0001701;GO:0045648;GO:0001942;GO:0046545;GO:1901165;GO:0038092;GO:0006355;GO:0045944;GO:0070062;GO:0009986;GO:0048179;GO:0019838;GO:0016361;GO:0046872;GO:0005524;GO:0046332;GO:0034711;GO:0031625;GO:0004702;GO:004818	BP:peptidyl-threonine phosphorylation;BP:negative regulation of cell growth;BP:positive regulation of activin receptor signaling pathway;BP:G1/S transition of mitotic cell cycle;BP:extrinsic apoptotic signaling pathway;BP:negative regulation of gene expression;BP:positive regulation of gene expression;BP:positive regulation of pathway-restricted SMAD protein phosphorylation;BP:protein autophospho…	ENSG00000135503	ACVR1B	activin A receptor type 1B [Source:HGNC Symbol;Acc:HGNC:172]	27.23	12.665
GO:0016192;GO:0031629;GO:0061025;GO:0048278;GO:0006886;GO:0016192;GO:0015031;GO:0006886;GO:0006810;GO:0006886;GO:0048278;GO:0031629;GO:0061025;GO:0008021;GO:0016020;GO:0005794;GO:0016021;GO:0005886;GO:0031201;GO:0005794;GO:0005794;GO:0016020;GO:0016020;GO:0016021;GO:0005886;GO:0031201;GO:0008021;GO:0005484;GO:0005515;GO:0005484;GO:0005515;GO:0000149;GO:0005484;GO:0005484;GO:000014	BP:vesicle-mediated transport;BP:synaptic vesicle fusion to presynaptic active zone membrane;BP:membrane fusion;BP:vesicle docking;BP:intracellular protein transport;BP:vesicle-mediated transport;BP:protein transport;BP:intracellular protein transport;BP:transport;BP:intracellular protein transport;BP:vesicle docking;BP:synaptic vesicle fusion to presynaptic active zone membrane;BP:membrane fusio…	ENSG00000135604	STX11	syntaxin 11 [Source:HGNC Symbol;Acc:HGNC:11429]	21.39	4.765
GO:0060347;GO:0060711;GO:0001666;GO:0061418;GO:0051344;GO:0045765;GO:0055008;GO:0043433;GO:0055114;GO:0018401;GO:0030821;GO:0071731;GO:0060412;GO:0032364;GO:0005737;GO:0005634;GO:0005829;GO:0019899;GO:0031418;GO:0016705;GO:0005506;GO:003154	BP:heart trabecula formation;BP:labyrinthine layer development;BP:response to hypoxia;BP:regulation of transcription from RNA polymerase II promoter in response to hypoxia;BP:negative regulation of cyclic-nucleotide phosphodiesterase activity;BP:regulation of angiogenesis;BP:cardiac muscle tissue morphogenesis;BP:negative regulation of sequence-specific DNA binding transcription factor activity;B…	ENSG00000135766	EGLN1	egl-9 family hypoxia inducible factor 1 [Source:HGNC Symbol;Acc:HGNC:1232]	7.44	19.795
GO:0045444;GO:0043488;GO:0045071;GO:0006364;GO:0006468;GO:0006397;GO:0090305;GO:0006468;GO:0090501;GO:0090502;GO:0051607;GO:0051607;GO:0045944;GO:0045071;GO:0006468;GO:0060337;GO:0060338;GO:0090501;GO:0060337;GO:0055085;GO:0090502;GO:0051607;GO:0045944;GO:2001275;GO:0006397;GO:0005759;GO:0016363;GO:0005739;GO:0005737;GO:0005575;GO:0005829;GO:0005759;GO:0005829;GO:0004540;GO:0004521;GO:0004672;GO:…	BP:fat cell differentiation;BP:regulation of mRNA stability;BP:negative regulation of viral genome replication;BP:rRNA processing;BP:protein phosphorylation;BP:mRNA processing;BP:nucleic acid phosphodiester bond hydrolysis;BP:protein phosphorylation;BP:RNA phosphodiester bond hydrolysis;BP:RNA phosphodiester bond hydrolysis, endonucleolytic;BP:defense response to virus;BP:defense response to viru…	ENSG00000135828	RNASEL	ribonuclease L [Source:HGNC Symbol;Acc:HGNC:10050]	0.345	1.385
GO:000585	CC:cytoskeleton;	ENSG00000135842	FAM129A	family with sequence similarity 129 member A [Source:HGNC Symbol;Acc:HGNC:16784]	3.76	0.75
GO:0016032;GO:0006355;GO:0007165;GO:0005730;GO:0004871;GO:0003677;GO:000827	BP:viral process;BP:regulation of transcription, DNA-templated;BP:signal transduction;CC:nucleolus;MF:signal transducer activity;MF:DNA binding;MF:zinc ion binding;	ENSG00000135899	SP110	SP110 nuclear body protein [Source:HGNC Symbol;Acc:HGNC:5401]	73.665	24.33
GO:0007205;GO:0043406;GO:0051000;GO:0042310;GO:0043547;GO:0001938;GO:0007210;GO:0003300;GO:0070528;GO:1904015;GO:0051209;GO:0006182;GO:0010507;GO:0043123;GO:0048598;GO:0019722;GO:0006939;GO:0043066;GO:0014827;GO:0003007;GO:0071502;GO:0070371;GO:0051781;GO:0050795;GO:0050715;GO:0048598;GO:0043066;GO:0042493;GO:0014033;GO:0007507;GO:0007205;GO:0003300;GO:0003007;GO:0002031;GO:0001938;GO:0001755;GO:…	BP:protein kinase C-activating G-protein coupled receptor signaling pathway;BP:positive regulation of MAP kinase activity;BP:positive regulation of nitric-oxide synthase activity;BP:vasoconstriction;BP:positive regulation of GTPase activity;BP:positive regulation of endothelial cell proliferation;BP:serotonin receptor signaling pathway;BP:cardiac muscle hypertrophy;BP:protein kinase C signaling;B…	ENSG00000135914	HTR2B	5-hydroxytryptamine receptor 2B [Source:HGNC Symbol;Acc:HGNC:5294]	0.02	0.34
GO:0042723;GO:0071934;GO:0006810;GO:0016021;GO:0016020;GO:0016021;GO:0016020;GO:0005887;GO:001540	BP:thiamine-containing compound metabolic process;BP:thiamine transmembrane transport;BP:transport;CC:integral component of membrane;CC:membrane;CC:integral component of membrane;CC:membrane;CC:integral component of plasma membrane;MF:thiamine uptake transmembrane transporter activity;	ENSG00000135917	SLC19A3	solute carrier family 19 member 3 [Source:HGNC Symbol;Acc:HGNC:16266]	0.405	0
GO:0030308;GO:0048711;GO:0009314;GO:0032940;GO:0050974;GO:0061108;GO:0060384;GO:0042628;GO:0010766;GO:0008285;GO:0030334;GO:0045879;GO:0090331;GO:0061110;GO:0010951;GO:0014067;GO:0033363;GO:0060291;GO:0048505;GO:0042177;GO:0010757;GO:0051966;GO:0007566;GO:0021683;GO:0010976;GO:0031012;GO:0031594;GO:0031232;GO:0031091;GO:0005615;GO:1903561;GO:0043025;GO:0005829;GO:0004867;GO:0008201;GO:000510	BP:negative regulation of cell growth;BP:positive regulation of astrocyte differentiation;BP:response to radiation;BP:secretion by cell;BP:detection of mechanical stimulus involved in sensory perception;BP:seminal vesicle epithelium development;BP:innervation;BP:mating plug formation;BP:negative regulation of sodium ion transport;BP:negative regulation of cell proliferation;BP:regulation of cell …	ENSG00000135919	SERPINE2	serpin family E member 2 [Source:HGNC Symbol;Acc:HGNC:8951]	13.915	4.905
GO:0043231;GO:000573	CC:intracellular membrane-bounded organelle;CC:mitochondrion;	ENSG00000135926	TMBIM1	transmembrane BAX inhibitor motif containing 1 [Source:HGNC Symbol;Acc:HGNC:23410]	173.67	93.66
GO:0016192;GO:0007165;GO:0006355;GO:0016192;GO:0015031;GO:0006886;GO:0006810;GO:0008333;GO:0007179;GO:0034058;GO:0008333;GO:0006355;GO:0034058;GO:0006886;GO:0007179;GO:0007165;GO:0016020;GO:0043231;GO:0016020;GO:0005737;GO:0005768;GO:0005769;GO:0005769;GO:0005622;GO:0033263;GO:0005769;GO:0005515;GO:0005515;GO:0046332;GO:0005160;GO:0005160;GO:004633	BP:vesicle-mediated transport;BP:signal transduction;BP:regulation of transcription, DNA-templated;BP:vesicle-mediated transport;BP:protein transport;BP:intracellular protein transport;BP:transport;BP:endosome to lysosome transport;BP:transforming growth factor beta receptor signaling pathway;BP:endosomal vesicle fusion;BP:endosome to lysosome transport;BP:regulation of transcription, DNA-templat…	ENSG00000135966	TGFBRAP1	transforming growth factor beta receptor associated protein 1 [Source:HGNC Symbol;Acc:HGNC:16836]	13.455	27.06
GO:0046655;GO:0006730;GO:0009058;GO:0009258;GO:0055114;GO:0005737;GO:0070062;GO:0005739;GO:0005759;GO:0019145;GO:0016155;GO:0016620;GO:0016742;GO:004710	BP:folic acid metabolic process;BP:one-carbon metabolic process;BP:biosynthetic process;BP:10-formyltetrahydrofolate catabolic process;BP:oxidation-reduction process;CC:cytoplasm;CC:extracellular exosome;CC:mitochondrion;CC:mitochondrial matrix;MF:aminobutyraldehyde dehydrogenase activity;MF:formyltetrahydrofolate dehydrogenase activity;MF:oxidoreductase activity, acting on the aldehyde or oxo gr…	ENSG00000136010	ALDH1L2	aldehyde dehydrogenase 1 family member L2 [Source:HGNC Symbol;Acc:HGNC:26777]	0.085	0.3
GO:0090231;GO:0043161;GO:0090266;GO:0006511;GO:1904667;GO:0016579;GO:0051301;GO:0015630;GO:0005730;GO:0008270;GO:0005515;GO:000484	BP:regulation of spindle checkpoint;BP:proteasome-mediated ubiquitin-dependent protein catabolic process;BP:regulation of mitotic cell cycle spindle assembly checkpoint;BP:ubiquitin-dependent protein catabolic process;BP:negative regulation of ubiquitin protein ligase activity;BP:protein deubiquitination;BP:cell division;CC:microtubule cytoskeleton;CC:nucleolus;MF:zinc ion binding;MF:protein bind…	ENSG00000136014	USP44	ubiquitin specific peptidase 44 [Source:HGNC Symbol;Acc:HGNC:20064]	0.115	0.29
GO:0006915;GO:0010506;GO:0016021;GO:0005764;GO:0005765;GO:000551	BP:apoptotic process;BP:regulation of autophagy;CC:integral component of membrane;CC:lysosome;CC:lysosomal membrane;MF:protein binding;	ENSG00000136048	DRAM1	DNA damage regulated autophagy modulator 1 [Source:HGNC Symbol;Acc:HGNC:25645]	64.175	20.94
GO:0098655;GO:0006812;GO:0098655;GO:0016021;GO:0016021;GO:0016020;GO:0008324;GO:000832	BP:cation transmembrane transport;BP:cation transport;BP:cation transmembrane transport;CC:integral component of membrane;CC:integral component of membrane;CC:membrane;MF:cation transmembrane transporter activity;MF:cation transmembrane transporter activity;	ENSG00000136052	SLC41A2	solute carrier family 41 member 2 [Source:HGNC Symbol;Acc:HGNC:31045]	11.265	4.325
GO:0005737;GO:0016021;GO:0005576;GO:0005576;GO:0005829;GO:0016021;GO:001602	CC:cytoplasm;CC:integral component of membrane;CC:extracellular region;CC:extracellular region;CC:cytosol;CC:integral component of membrane;CC:membrane;	ENSG00000136114	THSD1	thrombospondin type 1 domain containing 1 [Source:HGNC Symbol;Acc:HGNC:17754]	4.38	13.575
GO:0051387;GO:0033138;GO:0060437;GO:0042059;GO:0043407;GO:0010628;GO:0071902;GO:0010801;GO:0007275;GO:0031345;GO:0045595;GO:0007275;GO:0007275;GO:0009966;GO:0070373;GO:0010628;GO:0042127;GO:0046580;GO:0071902;GO:0043066;GO:0030335;GO:0070374;GO:0070373;GO:0070373;GO:0051897;GO:0010801;GO:0042059;GO:0033138;GO:0031345;GO:0051897;GO:0043066;GO:0060449;GO:0042127;GO:0008285;GO:0007605;GO:0034260;GO:…	BP:negative regulation of neurotrophin TRK receptor signaling pathway;BP:positive regulation of peptidyl-serine phosphorylation;BP:lung growth;BP:negative regulation of epidermal growth factor receptor signaling pathway;BP:negative regulation of MAP kinase activity;BP:positive regulation of gene expression;BP:positive regulation of protein serine/threonine kinase activity;BP:negative regulation o…	ENSG00000136158	SPRY2	sprouty RTK signaling antagonist 2 [Source:HGNC Symbol;Acc:HGNC:11270]	1.505	14.205
GO:0006338;GO:0000122;GO:0045944;GO:0051571;GO:0051574;GO:0045624;GO:0016363;GO:0001077;GO:0005515;GO:000097	BP:chromatin remodeling;BP:negative regulation of transcription from RNA polymerase II promoter;BP:positive regulation of transcription from RNA polymerase II promoter;BP:positive regulation of histone H3-K4 methylation;BP:positive regulation of histone H3-K9 methylation;BP:positive regulation of T-helper cell differentiation;CC:nuclear matrix;MF:transcriptional activator activity, RNA polymerase…	ENSG00000136169	SETDB2	SET domain bifurcated 2 [Source:HGNC Symbol;Acc:HGNC:20263]	0.42	1.22
GO:0008284;GO:0048286;GO:0016477;GO:0005737;GO:0005925;GO:000551	BP:positive regulation of cell proliferation;BP:lung alveolus development;BP:cell migration;CC:cytoplasm;CC:focal adhesion;MF:protein binding;	ENSG00000136205	TNS3	tensin 3 [Source:HGNC Symbol;Acc:HGNC:21616]	15.545	9.055
GO:0006955;GO:0006955;GO:0005576;GO:0005576;GO:0005125;GO:0005138;GO:0005125;GO:000513	BP:immune response;BP:immune response;CC:extracellular region;CC:extracellular region;MF:cytokine activity;MF:interleukin-6 receptor binding;MF:cytokine activity;MF:interleukin-6 receptor binding;	ENSG00000136244	IL6	interleukin 6 [Source:HGNC Symbol;Acc:HGNC:6018]	259.835	13.63
GO:0046872;GO:0008270;GO:0008270;GO:000551	MF:metal ion binding;MF:zinc ion binding;MF:zinc ion binding;MF:protein binding;	ENSG00000136490	LIMD2	LIM domain containing 2 [Source:HGNC Symbol;Acc:HGNC:28142]	89.655	63.79
GO:0001580;GO:0006612;GO:0051205;GO:0001580;GO:0051205;GO:0006612;GO:0005737;GO:0016021;GO:0016021;GO:0016020;GO:0005737;GO:0009986;GO:0031849;GO:0005515;GO:003184	BP:detection of chemical stimulus involved in sensory perception of bitter taste;BP:protein targeting to membrane;BP:protein insertion into membrane;BP:detection of chemical stimulus involved in sensory perception of bitter taste;BP:protein insertion into membrane;BP:protein targeting to membrane;CC:cytoplasm;CC:integral component of membrane;CC:integral component of membrane;CC:membrane;CC:cytop…	ENSG00000136514	RTP4	receptor transporter protein 4 [Source:HGNC Symbol;Acc:HGNC:23992]	9.16	2.54
GO:0006997;GO:0008283;GO:0048711;GO:0043065;GO:0060988;GO:0071156;GO:0016032;GO:0045664;GO:0042692;GO:0030100;GO:0015629;GO:0030315;GO:0005634;GO:0030018;GO:0033268;GO:0060987;GO:0043194;GO:0070063;GO:0048156;GO:0042802;GO:005101	BP:nucleus organization;BP:cell proliferation;BP:positive regulation of astrocyte differentiation;BP:positive regulation of apoptotic process;BP:lipid tube assembly;BP:regulation of cell cycle arrest;BP:viral process;BP:regulation of neuron differentiation;BP:muscle cell differentiation;BP:regulation of endocytosis;CC:actin cytoskeleton;CC:T-tubule;CC:nucleus;CC:Z disc;CC:node of Ranvier;CC:lipid…	ENSG00000136717	BIN1	bridging integrator 1 [Source:HGNC Symbol;Acc:HGNC:1052]	33.11	21.21
GO:2000342;GO:0034115;GO:0031328;GO:0031327;GO:0030154;GO:1902532;GO:0045429;GO:0045444;GO:0009653;GO:0045595;GO:0051716;GO:0000122;GO:0051241;GO:0051246;GO:0032270;GO:0044092;GO:0045944;GO:0051973;GO:0008285;GO:0035166;GO:0045935;GO:1904998;GO:1901701;GO:0071499;GO:0050728;GO:0035019;GO:0071363;GO:0060761;GO:0010033;GO:0007500;GO:0045415;GO:0090051;GO:0032088;GO:0043154;GO:0010557;GO:0006357;GO:…	BP:negative regulation of chemokin;BP:negative regulation of heterotypic cell-cell adhesion;BP:positive regulation of cellular biosynthetic process;BP:negative regulation of cellular biosynthetic process;BP:cell differentiation;BP:negative regulation of intracellular signal transduction;BP:positive regulation of nitric oxide biosynthetic process;BP:fat cell differentiation;BP:anatomical structure…	ENSG00000136826	KLF4	Kruppel like factor 4 [Source:HGNC Symbol;Acc:HGNC:6348]	6.37	0.905
GO:0051694;GO:0030049;GO:0006936;GO:0030239;GO:0070307;GO:0008344;GO:0030049;GO:0051694;GO:0005737;GO:0005856;GO:0005829;GO:0008180;GO:0030016;GO:0005884;GO:0030017;GO:0030863;GO:0005829;GO:0016020;GO:0030017;GO:0005865;GO:0008180;GO:0003779;GO:0003779;GO:0051015;GO:0005523;GO:0051015;GO:000552	BP:pointed-end actin filament capping;BP:muscle filament sliding;BP:muscle contraction;BP:myofibril assembly;BP:lens fiber cell development;BP:adult locomotory behavior;BP:muscle filament sliding;BP:pointed-end actin filament capping;CC:cytoplasm;CC:cytoskeleton;CC:cytosol;CC:COP9 signalosome;CC:myofibril;CC:actin filament;CC:sarcomere;CC:cortical cytoskeleton;CC:cytosol;CC:membrane;CC:sarcomere;…	ENSG00000136842	TMOD1	tropomodulin 1 [Source:HGNC Symbol;Acc:HGNC:11871]	4.53	2.385
GO:0007018;GO:0005737;GO:0070062;GO:0005871;GO:0005874;GO:0008017;GO:0005524;GO:0016887;GO:000377	BP:microtubule-based movement;CC:cytoplasm;CC:extracellular exosome;CC:kinesin complex;CC:microtubule;MF:microtubule binding;MF:ATP binding;MF:ATPase activity;MF:microtubule motor activity;	ENSG00000136883	KIF12	kinesin family member 12 [Source:HGNC Symbol;Acc:HGNC:21495]	0.75	0.34
GO:1900264;GO:0034421;GO:0034088;GO:0005654;GO:0000785;GO:0000775;GO:0031390;GO:0003689;GO:0043142;GO:000551	BP:positive regulation of DNA-directed DNA polymerase activity;BP:post-translational protein acetylation;BP:maintenance of mitotic sister chromatid cohesion;CC:nucleoplasm;CC:chromatin;CC:chromosome, centromeric region;CC:Ctf18 RFC-like complex;MF:DNA clamp loader activity;MF:single-stranded DNA-dependent ATPase activity;MF:protein binding;	ENSG00000136982	DSCC1	DNA replication and sister chromatid cohesion 1 [Source:HGNC Symbol;Acc:HGNC:24453]	0.27	1.955
GO:0030212;GO:0008283;GO:0031659;GO:0043433;GO:0007275;GO:0006468;GO:0043066;GO:0046777;GO:0070561;GO:0005737;GO:0005886;GO:0005634;GO:0008134;GO:0030145;GO:0004674;GO:0043024;GO:000552	BP:hyaluronan metabolic process;BP:cell proliferation;BP:positive regulation of cyclin-dependent protein serine/threonine kinase activity involved in G1/S transition of mitotic cell cycle;BP:negative regulation of sequence-specific DNA binding transcription factor activity;BP:multicellular organism development;BP:protein phosphorylation;BP:negative regulation of apoptotic process;BP:protein autop…	ENSG00000137193	PIM1	Pim-1 proto-oncogene, serine/threonine kinase [Source:HGNC Symbol;Acc:HGNC:8986]	5.11	2.9
GO:0097309;GO:0080009;GO:0006370;GO:0005737;GO:0005654;GO:0004483;GO:000367	BP:cap1 mRNA methylation;BP:mRNA methylation;BP:7-methylguanosine mRNA capping;CC:cytoplasm;CC:nucleoplasm;MF:mRN;MF:nucleic acid binding;	ENSG00000137200	CMTR1	cap methyltransferase 1 [Source:HGNC Symbol;Acc:HGNC:21077]	42.28	26.035
GO:0006811;GO:0015629;GO:0016021;GO:0005886;GO:000016	BP:ion transport;CC:actin cytoskeleton;CC:integral component of membrane;CC:plasma membrane;MF:nucleotide binding;	ENSG00000137216	TMEM63B	transmembrane protein 63B [Source:HGNC Symbol;Acc:HGNC:17735]	40.565	15.885
GO:0055085;GO:0015711;GO:0005887;GO:0008514;GO:000551	BP:transmembrane transport;BP:organic anion transport;CC:integral component of plasma membrane;MF:organic anion transmembrane transporter activity;MF:protein binding;	ENSG00000137266	SLC22A23	solute carrier family 22 member 23 [Source:HGNC Symbol;Acc:HGNC:21106]	0.51	1.565
GO:000016	MF:nucleotide binding;	ENSG00000137267	TUBB2A	tubulin beta 2A class IIa [Source:HGNC Symbol;Acc:HGNC:12412]	84.535	55.865
GO:0007017;GO:0005737;GO:0070062;GO:0005634;GO:0005874;GO:0003924;GO:0005200;GO:000552	BP:microtubule-based process;CC:cytoplasm;CC:extracellular exosome;CC:nucleus;CC:microtubule;MF:GTPase activity;MF:structural constituent of cytoskeleton;MF:GTP binding;	ENSG00000137285	TUBB2B	tubulin beta 2B class IIb [Source:HGNC Symbol;Acc:HGNC:30829]	52.855	27.735
GO:0014066;GO:0043066;GO:0043066;GO:0006915;GO:0043066;GO:0014066;GO:0009653;GO:0010941;GO:2001020;GO:2001020;GO:0009653;GO:0005829;GO:0016021;GO:0016021;GO:0016020;GO:0005829;GO:0005634;GO:0005634;GO:0005515;GO:000551	BP:regulation of phosphatidylinositol 3-kinase signaling;BP:negative regulation of apoptotic process;BP:negative regulation of apoptotic process;BP:apoptotic process;BP:negative regulation of apoptotic process;BP:regulation of phosphatidylinositol 3-kinase signaling;BP:anatomical structure morphogenesis;BP:regulation of cell death;BP:regulation of response to DNA damage stimulus;BP:regulation of …	ENSG00000137331	IER3	immediate early response 3 [Source:HGNC Symbol;Acc:HGNC:5392]	282.25	155.51
GO:0034134;GO:0038123;GO:0038124;GO:0051770;GO:0071223;GO:0050729;GO:0007252;GO:0071727;GO:0071726;GO:0050707;GO:0032728;GO:0002237;GO:0032722;GO:0032760;GO:0070542;GO:0046209;GO:0048714;GO:0032868;GO:0032733;GO:0032570;GO:0032496;GO:0032493;GO:0032289;GO:0009636;GO:0008285;GO:0006954;GO:0006691;GO:0002224;GO:0001774;GO:0001666;GO:0001775;GO:0006955;GO:0007165;GO:0007165;GO:0006954;GO:0002224;GO:…	BP:toll-like receptor 2 signaling pathway;BP:toll-like receptor TLR;BP:toll-like receptor TLR;BP:positive regulation of nitric-oxide synthase biosynthetic process;BP:cellular response to lipoteichoic acid;BP:positive regulation of inflammatory response;BP:I-kappaB phosphorylation;BP:cellular response to triacyl bacterial lipopeptide;BP:cellular response to diacyl bacterial lipopeptide;BP:regulati…	ENSG00000137462	TLR2	toll like receptor 2 [Source:HGNC Symbol;Acc:HGNC:11848]	0.415	0.185
GO:0007030;GO:0007264;GO:0043231;GO:0005801;GO:0005802;GO:0031985;GO:0005622;GO:0003924;GO:0005525;GO:000552	BP:Golgi organization;BP:small GTPase mediated signal transduction;CC:intracellular membrane-bounded organelle;CC:cis-Golgi network;CC:trans-Golgi network;CC:Golgi cisterna;CC:intracellular;MF:GTPase activity;MF:GTP binding;MF:GTP binding;	ENSG00000137502	RAB30	RAB30, member RAS oncogene family [Source:HGNC Symbol;Acc:HGNC:9770]	1.78	5.28
GO:0030488;GO:0006974;GO:0055114;GO:0002098;GO:0015630;GO:0005654;GO:0005829;GO:0016706;GO:0016300;GO:0000166;GO:0000049;GO:0008270;GO:0005515;GO:000550	BP:tRNA methylation;BP:cellular response to DNA damage stimulus;BP:oxidation-reduction process;BP:tRNA wobble uridine modification;CC:microtubule cytoskeleton;CC:nucleoplasm;CC:cytosol;MF:oxidoreductase activity, acting on paired donors, with incorporation or reduction of molecular oxygen, 2-oxoglutarate as one donor, and incorporation of one atom each of oxygen into both donors;MF:tRN;MF:nucleot…	ENSG00000137760	ALKBH8	alkB homolog 8, tRNA methyltransferase [Source:HGNC Symbol;Acc:HGNC:25189]	0.625	4
GO:0055114;GO:0070221;GO:0070813;GO:0055114;GO:0005743;GO:0016491;GO:0070224;GO:0048038;GO:001649	BP:oxidation-reduction process;BP:sulfide oxidation, using sulfid;BP:hydrogen sulfide metabolic process;BP:oxidation-reduction process;CC:mitochondrial inner membrane;MF:oxidoreductase activity;MF:sulfid;MF:quinone binding;MF:oxidoreductase activity;	ENSG00000137767	SQOR	sulfide quinone oxidoreductase [Source:HGNC Symbol;Acc:HGNC:20390]	39.39	15.555
GO:0097190;GO:1901222;GO:0005856;GO:0070062;GO:0005634;GO:0005739;GO:000551	BP:apoptotic signaling pathway;BP:regulation of NIK/NF-kappaB signaling;CC:cytoskeleton;CC:extracellular exosome;CC:nucleus;CC:mitochondrion;MF:protein binding;	ENSG00000137831	UACA	uveal autoantigen with coiled-coil domains and ankyrin repeats [Source:HGNC Symbol;Acc:HGNC:15947]	8.075	48.515
GO:0016021;GO:001678	CC:integral component of membrane;MF:hydrolase activity;	ENSG00000137842	TMEM62	transmembrane protein 62 [Source:HGNC Symbol;Acc:HGNC:26269]	13.455	9.645
GO:0043065;GO:0008630;GO:0006919;GO:0097192;GO:0007292;GO:0007283;GO:2001243;GO:2001240;GO:0048709;GO:0043065;GO:0042981;GO:2001240;GO:2001243;GO:0016021;GO:0005829;GO:0031965;GO:0005741;GO:0016020;GO:0046982;GO:0042803;GO:004280	BP:positive regulation of apoptotic process;BP:intrinsic apoptotic signaling pathway in response to DNA damage;BP:activation of cysteine-type endopeptidase activity involved in apoptotic process;BP:extrinsic apoptotic signaling pathway in absence of ligand;BP:female gamete generation;BP:spermatogenesis;BP:negative regulation of intrinsic apoptotic signaling pathway;BP:negative regulation of extri…	ENSG00000137875	BCL2L10	BCL2 like 10 [Source:HGNC Symbol;Acc:HGNC:993]	0.11	1.28
GO:0032774;GO:0035556;GO:0051685;GO:0031234;GO:0005635;GO:0030864;GO:0030018;GO:0016591;GO:0043025;GO:0030054;GO:0005515;GO:000389	BP:RNA biosynthetic process;BP:intracellular signal transduction;BP:maintenance of ER location;CC:extrinsic component of cytoplasmic side of plasma membrane;CC:nuclear envelope;CC:cortical actin cytoskeleton;CC:Z disc;CC:DNA-directed RNA polymerase II, holoenzyme;CC:neuronal cell body;CC:cell junction;MF:protein binding;MF:DNA-directed RNA polymerase activity;	ENSG00000137878	GCOM1	GRINL1A complex locus 1 [Source:HGNC Symbol;Acc:HGNC:26424]	0.27	1.375
GO:0006355;GO:0006352;GO:0006413;GO:0005634;GO:0017025;GO:0008270;GO:000374	BP:regulation of transcription, DNA-templated;BP:DNA-templated transcription, initiation;BP:translational initiation;CC:nucleus;MF:TBP-class protein binding;MF:zinc ion binding;MF:translation initiation factor activity;	ENSG00000137947	GTF2B	general transcription factor IIB [Source:HGNC Symbol;Acc:HGNC:4648]	35.75	17.64
GO:0008152;GO:0008152;GO:0046487;GO:0009083;GO:0042645;GO:0005947;GO:0005739;GO:0031625;GO:0016746;GO:0016746;GO:0016746;GO:0016740;GO:004375	BP:metabolic process;BP:metabolic process;BP:glyoxylate metabolic process;BP:branched-chain amino acid catabolic process;CC:mitochondrial nucleoid;CC:mitochondrial alpha-ketoglutarate dehydrogenase complex;CC:mitochondrion;MF:ubiquitin protein ligase binding;MF:transferase activity, transferring acyl groups;MF:transferase activity, transferring acyl groups;MF:transferase activity, transferring ac…	ENSG00000137992	DBT	dihydrolipoamide branched chain transacylase E2 [Source:HGNC Symbol;Acc:HGNC:2698]	0.45	1.65
GO:0006633;GO:0016126;GO:0035754;GO:0008203;GO:0006629;GO:0055114;GO:0055114;GO:0008202;GO:0008610;GO:0006694;GO:0016126;GO:0035754;GO:0006629;GO:0006699;GO:0008203;GO:0006699;GO:0055114;GO:0008203;GO:0005829;GO:0005789;GO:0005789;GO:0005783;GO:0016021;GO:0016020;GO:0005829;GO:0005789;GO:0016021;GO:0001567;GO:0008395;GO:0001567;GO:0005506;GO:0016491;GO:0016491;GO:0004497;GO:0046872;GO:0001567;GO:…	BP:fatty acid biosynthetic process;BP:sterol biosynthetic process;BP:B cell chemotaxis;BP:cholesterol metabolic process;BP:lipid metabolic process;BP:oxidation-reduction process;BP:oxidation-reduction process;BP:steroid metabolic process;BP:lipid biosynthetic process;BP:steroid biosynthetic process;BP:sterol biosynthetic process;BP:B cell chemotaxis;BP:lipid metabolic process;BP:bile acid biosynt…	ENSG00000138135	CH25H	cholesterol 25-hydroxylase [Source:HGNC Symbol;Acc:HGNC:1907]	4.13	0.81
GO:0000187;GO:0001706;GO:0000188;GO:0035335;GO:0005654;GO:0004725;GO:0017017;GO:000551	BP:activation of MAPK activity;BP:endoderm formation;BP:inactivation of MAPK activity;BP:peptidyl-tyrosine dephosphorylation;CC:nucleoplasm;MF:protein tyrosine phosphatase activity;MF:MAP kinase tyrosine/serine/threonine phosphatase activity;MF:protein binding;	ENSG00000138166	DUSP5	dual specificity phosphatase 5 [Source:HGNC Symbol;Acc:HGNC:3071]	53.07	6.96
GO:0098655;GO:0016021;GO:0005887;GO:000526	BP:cation transmembrane transport;CC:integral component of membrane;CC:integral component of plasma membrane;MF:cation channel activity;	ENSG00000138172	CALHM2	calcium homeostasis modulator 2 [Source:HGNC Symbol;Acc:HGNC:23493]	5.065	17.845
GO:0033566;GO:0000281;GO:0005737;GO:0005813;GO:0000930;GO:0005815;GO:0005515;GO:004280	BP:gamma-tubulin complex localization;BP:mitotic cytokinesis;CC:cytoplasm;CC:centrosome;CC:gamma-tubulin complex;CC:microtubule organizing center;MF:protein binding;MF:protein homodimerization activity;	ENSG00000138311	ZNF365	zinc finger protein 365 [Source:HGNC Symbol;Acc:HGNC:18194]	0.08	0.68
GO:0008284;GO:0019827;GO:0006493;GO:0080111;GO:0001826;GO:0090310;GO:0045944;GO:0031062;GO:0055114;GO:0016569;GO:0006355;GO:0006351;GO:0055114;GO:0045944;GO:0008284;GO:0006493;GO:0080111;GO:0019827;GO:0090310;GO:0001826;GO:0031062;GO:0005634;GO:0005634;GO:0005634;GO:0043566;GO:0008270;GO:0005506;GO:0070579;GO:0003677;GO:0003677;GO:0003677;GO:0016491;GO:0046872;GO:0008270;GO:0051213;GO:0005506;GO:…	BP:positive regulation of cell proliferation;BP:stem cell population maintenance;BP:protein O-linked glycosylation;BP:DNA demethylation;BP:inner cell mass cell differentiation;BP:negative regulation of methylation-dependent chromatin silencing;BP:positive regulation of transcription from RNA polymerase II promoter;BP:positive regulation of histone methylation;BP:oxidation-reduction process;BP:cov…	ENSG00000138336	TET1	tet methylcytosine dioxygenase 1 [Source:HGNC Symbol;Acc:HGNC:29484]	0	0.195
GO:1902990;GO:0090305;GO:0043504;GO:0000722;GO:0000729;GO:0006264;GO:0045740;GO:0006284;GO:0032508;GO:1901796;GO:0000076;GO:0000731;GO:0000732;GO:0043137;GO:0000784;GO:0042645;GO:0005654;GO:0005760;GO:0017108;GO:0003677;GO:0043142;GO:0046872;GO:0005524;GO:0016890;GO:0051539;GO:0005515;GO:004313	BP:mitotic telomere maintenance via semi-conservative replication;BP:nucleic acid phosphodiester bond hydrolysis;BP:mitochondrial DNA repair;BP:telomere maintenance via recombination;BP:DNA double-strand break processing;BP:mitochondrial DNA replication;BP:positive regulation of DNA replication;BP:base-excision repair;BP:DNA duplex unwinding;BP:regulation of signal transduction by p53 class media…	ENSG00000138346	DNA2	DNA replication helicase/nuclease 2 [Source:HGNC Symbol;Acc:HGNC:2939]	0.985	1.63
GO:0043065;GO:0006303;GO:0016567;GO:0000729;GO:0043066;GO:0006260;GO:1901796;GO:0007050;GO:0001894;GO:0042325;GO:0031441;GO:0000731;GO:0000732;GO:0046826;GO:0045732;GO:0085020;GO:0005737;GO:0031436;GO:0005654;GO:0070531;GO:0008270;GO:0016874;GO:0042803;GO:0019900;GO:0004842;GO:0003723;GO:0005515;GO:004698	BP:positive regulation of apoptotic process;BP:double-strand break repair via nonhomologous end joining;BP:protein ubiquitination;BP:DNA double-strand break processing;BP:negative regulation of apoptotic process;BP:DNA replication;BP:regulation of signal transduction by p53 class mediator;BP:cell cycle arrest;BP:tissue homeostasis;BP:regulation of phosphorylation;BP:negative regulation of mRNA 3'…	ENSG00000138376	BARD1	BRCA1 associated RING domain 1 [Source:HGNC Symbol;Acc:HGNC:952]	0.69	1.79
GO:0007165;GO:000635	BP:signal transduction;BP:regulation of transcription, DNA-templated;	ENSG00000138378	STAT4	signal transducer and activator of transcription 4 [Source:HGNC Symbol;Acc:HGNC:11365]	0.505	1.23
GO:0061400;GO:0035865;GO:0005730;GO:0005654;GO:0003700;GO:0001077;GO:0003677;GO:000097	BP:positive regulation of transcription from RNA polymerase II promoter in response to calcium ion;BP:cellular response to potassium ion;CC:nucleolus;CC:nucleoplasm;MF:transcription factor activity, sequence-specific DNA binding;MF:transcriptional activator activity, RNA polymerase II core promoter proximal region sequence-specific binding;MF:DNA binding;MF:RNA polymerase II core promoter proxima…	ENSG00000138380	CARF	calcium responsive transcription factor [Source:HGNC Symbol;Acc:HGNC:14435]	0.3	17.8
GO:0005737;GO:0005634;GO:0005886;GO:0051015;GO:0003779;GO:000510	CC:cytoplasm;CC:nucleus;CC:plasma membrane;MF:actin filament binding;MF:actin binding;MF:receptor binding;	ENSG00000138434	SSFA2	sperm specific antigen 2 [Source:HGNC Symbol;Acc:HGNC:11319]	8.155	35.34
GO:0030210;GO:0015012;GO:0006024;GO:0005794;GO:0016021;GO:0000139;GO:0016857;GO:0047464;GO:005037	BP:heparin biosynthetic process;BP:heparan sulfate proteoglycan biosynthetic process;BP:glycosaminoglycan biosynthetic process;CC:Golgi apparatus;CC:integral component of membrane;CC:Golgi membrane;MF:racemase and epimerase activity, acting on carbohydrates and derivatives;MF:heparosan-N-sulfate-glucuronate 5-epimerase activity;MF:UDP-glucuronate 5'-epimerase activity;	ENSG00000138604	GLCE	glucuronic acid epimerase [Source:HGNC Symbol;Acc:HGNC:17855]	8.4	22.47
GO:0006987;GO:0060548;GO:0070213;GO:0071902;GO:0016021;GO:0016020;GO:0016021;GO:0005635;GO:0005789;GO:0071782;GO:0003950;GO:0019900;GO:0003950;GO:004353	BP:activation of signaling protein activity involved in unfolded protein response;BP:negative regulation of cell death;BP:protein auto-ADP-ribosylation;BP:positive regulation of protein serine/threonine kinase activity;CC:integral component of membrane;CC:membrane;CC:integral component of membrane;CC:nuclear envelope;CC:endoplasmic reticulum membrane;CC:endoplasmic reticulum tubular network;MF:NA…	ENSG00000138617	PARP16	poly(ADP-ribose) polymerase family member 16 [Source:HGNC Symbol;Acc:HGNC:26040]	1.54	3.74
GO:0051056;GO:0005829;GO:000509	BP:regulation of small GTPase mediated signal transduction;CC:cytosol;MF:GTPase activator activity;	ENSG00000138640	FAM13A	family with sequence similarity 13 member A [Source:HGNC Symbol;Acc:HGNC:19367]	0.565	1.57
GO:0016021;GO:000827	CC:integral component of membrane;MF:zinc ion binding;	ENSG00000138658	ZGRF1	zinc finger GRF-type containing 1 [Source:HGNC Symbol;Acc:HGNC:25654]	0.56	1.335
GO:0034315;GO:0048203;GO:1900025;GO:2000146;GO:2000146;GO:1900025;GO:0034315;GO:0015031;GO:0048203;GO:0001920;GO:0034613;GO:0005829;GO:0005794;GO:0005794;GO:0005768;GO:0005829;GO:0005769;GO:0005770;GO:0030133;GO:0035650;GO:0019894;GO:003565	BP:regulation of Arp2/3 complex-mediated actin nucleation;BP:vesicle targeting, trans-Golgi to endosome;BP:negative regulation of substrate adhesion-dependent cell spreading;BP:negative regulation of cell motility;BP:negative regulation of cell motility;BP:negative regulation of substrate adhesion-dependent cell spreading;BP:regulation of Arp2/3 complex-mediated actin nucleation;BP:protein transp…	ENSG00000138660	AP1AR	adaptor related protein complex 1 associated regulatory protein [Source:HGNC Symbol;Acc:HGNC:28808]	2.195	5.705
GO:0019432;GO:0032006;GO:0016021;GO:0005789;GO:000436	BP:triglyceride biosynthetic process;BP:regulation of TOR signaling;CC:integral component of membrane;CC:endoplasmic reticulum membrane;MF:glycerol-3-phosphate O-acyltransferase activity;	ENSG00000138678	GPAT3	glycerol-3-phosphate acyltransferase 3 [Source:HGNC Symbol;Acc:HGNC:28157]	0.38	0.625
GO:0023014;GO:0007178;GO:0016020;GO:0005524;GO:0004702;GO:000467	BP:signal transduction by protein phosphorylation;BP:transmembrane receptor protein serine/threonine kinase signaling pathway;CC:membrane;MF:ATP binding;MF:receptor signaling protein serine/threonine kinase activity;MF:transmembrane receptor protein serine/threonine kinase activity;	ENSG00000138696	BMPR1B	bone morphogenetic protein receptor type 1B [Source:HGNC Symbol;Acc:HGNC:1077]	0.38	0.13
GO:0070098;GO:0006968;GO:0043950;GO:0051281;GO:0060326;GO:0051149;GO:0032496;GO:0051716;GO:0030816;GO:1901741;GO:0051607;GO:0045663;GO:0006955;GO:0006935;GO:0006954;GO:0006954;GO:0006935;GO:0006952;GO:0006955;GO:0006954;GO:0070098;GO:0042127;GO:0007186;GO:0006935;GO:0006954;GO:0007165;GO:0007267;GO:0032496;GO:0006952;GO:0002690;GO:0030816;GO:0043950;GO:0051281;GO:0006968;GO:0010818;GO:0045663;GO:…	BP:chemokine-mediated signaling pathway;BP:cellular defense response;BP:positive regulation of cAMP-mediated signaling;BP:positive regulation of release of sequestered calcium ion into cytosol;BP:cell chemotaxis;BP:positive regulation of muscle cell differentiation;BP:response to lipopolysaccharide;BP:cellular response to stimulus;BP:positive regulation of cAMP metabolic process;BP:positive regul…	ENSG00000138755	CXCL9	C-X-C motif chemokine ligand 9 [Source:HGNC Symbol;Acc:HGNC:7098]	592.07	0.215
GO:000551	MF:protein binding;	ENSG00000138867	GUCD1	guanylyl cyclase domain containing 1 [Source:HGNC Symbol;Acc:HGNC:14237]	91.295	53.44
GO:0016020;GO:0016021;GO:001602	CC:membrane;CC:integral component of membrane;CC:membrane;	ENSG00000138944	KIAA1644	KIAA1644 [Source:HGNC Symbol;Acc:HGNC:29335]	0.085	0.01
GO:0016021;GO:0032580;GO:0016740;GO:003384	CC:integral component of membrane;CC:Golgi cisterna membrane;MF:transferase activity;MF:N-acetyl-beta-glucosaminyl-glycoprotein 4-beta-N-acetylgalactosaminyltransferase activity;	ENSG00000139044	B4GALNT3	beta-1,4-N-acetyl-galactosaminyltransferase 3 [Source:HGNC Symbol;Acc:HGNC:24137]	0.49	0.05
GO:007006	CC:extracellular exosome;	ENSG00000139117	CPNE8	copine 8 [Source:HGNC Symbol;Acc:HGNC:23498]	3.9	1.72
GO:0043065;GO:0046847;GO:0030035;GO:0030036;GO:0008360;GO:0035023;GO:0030032;GO:0043547;GO:0001726;GO:0015629;GO:0005794;GO:0030027;GO:0005829;GO:0030175;GO:0005089;GO:0003779;GO:0031267;GO:004687	BP:positive regulation of apoptotic process;BP:filopodium assembly;BP:microspike assembly;BP:actin cytoskeleton organization;BP:regulation of cell shape;BP:regulation of Rho protein signal transduction;BP:lamellipodium assembly;BP:positive regulation of GTPase activity;CC:ruffle;CC:actin cytoskeleton;CC:Golgi apparatus;CC:lamellipodium;CC:cytosol;CC:filopodium;MF:Rho guanyl-nucleotide exchange fa…	ENSG00000139132	FGD4	FYVE, RhoGEF and PH domain containing 4 [Source:HGNC Symbol;Acc:HGNC:19125]	0.57	4.945
GO:0090090;GO:0032436;GO:0031398;GO:0006606;GO:0045892;GO:0060976;GO:0035904;GO:2000691;GO:0001843;GO:0005829;GO:0031965;GO:0005515;GO:000827	BP:negative regulation of canonical Wnt signaling pathway;BP:positive regulation of proteasomal ubiquitin-dependent protein catabolic process;BP:positive regulation of protein ubiquitination;BP:protein import into nucleus;BP:negative regulation of transcription, DNA-templated;BP:coronary vasculature development;BP:aorta development;BP:negative regulation of cardiac muscle cell myoblast differenti…	ENSG00000139174	PRICKLE1	prickle planar cell polarity protein 1 [Source:HGNC Symbol;Acc:HGNC:17019]	1.82	19.605
GO:0006968;GO:0006954;GO:0045087;GO:0007166;GO:0005886;GO:0016021;GO:0005515;GO:0030246;GO:000487	BP:cellular defense response;BP:inflammatory response;BP:innate immune response;BP:cell surface receptor signaling pathway;CC:plasma membrane;CC:integral component of membrane;MF:protein binding;MF:carbohydrate binding;MF:receptor activity;	ENSG00000139187	KLRG1	killer cell lectin like receptor G1 [Source:HGNC Symbol;Acc:HGNC:6380]	2.255	7.455
GO:0007155;GO:0043066;GO:0007156;GO:0007157;GO:0043069;GO:0043066;GO:0051965;GO:0007157;GO:0007156;GO:0016021;GO:0005886;GO:0016021;GO:0016020;GO:0005634;GO:0005886;GO:0005634;GO:0005515;GO:000551	BP:cell adhesion;BP:negative regulation of apoptotic process;BP:homophilic cell adhesion via plasma membrane adhesion molecules;BP:heterophilic cell-cell adhesion via plasma membrane cell adhesion molecules;BP:negative regulation of programmed cell death;BP:negative regulation of apoptotic process;BP:positive regulation of synapse assembly;BP:heterophilic cell-cell adhesion via plasma membrane ce…	ENSG00000139211	AMIGO2	adhesion molecule with Ig like domain 2 [Source:HGNC Symbol;Acc:HGNC:24073]	6.345	2.95
GO:0032474;GO:0016021;GO:000561	BP:otolith morphogenesis;CC:integral component of membrane;CC:extracellular space;	ENSG00000139263	LRIG3	leucine rich repeats and immunoglobulin like domains 3 [Source:HGNC Symbol;Acc:HGNC:30991]	53.305	14.815
GO:0051260;GO:0051260;GO:0030165;GO:0008270;GO:0030165;GO:0005515;GO:0046872;GO:000827	BP:protein homooligomerization;BP:protein homooligomerization;MF:PDZ domain binding;MF:zinc ion binding;MF:PDZ domain binding;MF:protein binding;MF:metal ion binding;MF:zinc ion binding;	ENSG00000139517	LNX2	ligand of numb-protein X 2 [Source:HGNC Symbol;Acc:HGNC:20421]	1.425	4.015
GO:000551	MF:protein binding;	ENSG00000139737	SLAIN1	SLAIN motif family member 1 [Source:HGNC Symbol;Acc:HGNC:26387]	0.535	1.595
GO:0007268;GO:0042594;GO:0007218;GO:0007586;GO:0007215;GO:0071392;GO:0007187;GO:0008285;GO:0007584;GO:0038170;GO:0007283;GO:0060125;GO:0021549;GO:0030900;GO:0071392;GO:0042594;GO:0030900;GO:0021549;GO:0007283;GO:0007218;GO:0007215;GO:0007186;GO:0007165;GO:0007186;GO:0007186;GO:0007267;GO:0007166;GO:0008285;GO:0007586;GO:0007584;GO:0007187;GO:0038170;GO:0071392;GO:0005887;GO:0005737;GO:0016021;GO:…	BP:chemical synaptic transmission;BP:response to starvation;BP:neuropeptide signaling pathway;BP:digestion;BP:glutamate receptor signaling pathway;BP:cellular response to estradiol stimulus;BP:G-protein coupled receptor signaling pathway, coupled to cyclic nucleotide second messenger;BP:negative regulation of cell proliferation;BP:response to nutrient;BP:somatostatin signaling pathway;BP:spermato…	ENSG00000139874	SSTR1	somatostatin receptor 1 [Source:HGNC Symbol;Acc:HGNC:11330]	0.07	0.935
GO:0032970;GO:0034613;GO:0003383;GO:0005856;GO:004329	BP:regulation of actin filament-based process;BP:cellular protein localization;BP:apical constriction;CC:cytoskeleton;CC:apical junction complex;	ENSG00000139926	FRMD6	FERM domain containing 6 [Source:HGNC Symbol;Acc:HGNC:19839]	6.435	31.065
GO:0043410;GO:0016567;GO:0008063;GO:0043123;GO:0005829;GO:0016021;GO:0034450;GO:0005515;GO:001687	BP:positive regulation of MAPK cascade;BP:protein ubiquitination;BP:Toll signaling pathway;BP:positive regulation of I-kappaB kinase/NF-kappaB signaling;CC:cytosol;CC:integral component of membrane;MF:ubiquitin-ubiquitin ligase activity;MF:protein binding;MF:ligase activity;	ENSG00000139946	PELI2	pellino E3 ubiquitin protein ligase family member 2 [Source:HGNC Symbol;Acc:HGNC:8828]	0.385	1.095
GO:0008630;GO:0042981;GO:0043066;GO:0006915;GO:0043066;GO:0043066;GO:0043066;GO:0097192;GO:0043065;GO:0008053;GO:0001836;GO:0055085;GO:0005741;GO:0005737;GO:0005515;GO:0005515;GO:0015267;GO:0046982;GO:004280	BP:intrinsic apoptotic signaling pathway in response to DNA damage;BP:regulation of apoptotic process;BP:negative regulation of apoptotic process;BP:apoptotic process;BP:negative regulation of apoptotic process;BP:negative regulation of apoptotic process;BP:negative regulation of apoptotic process;BP:extrinsic apoptotic signaling pathway in absence of ligand;BP:positive regulation of apoptotic pr…	ENSG00000140379	BCL2A1	BCL2 related protein A1 [Source:HGNC Symbol;Acc:HGNC:991]	6.425	0.165
GO:0051443;GO:0051443;GO:0005886;GO:0005886;GO:0016020;GO:0031410;GO:0005768;GO:0005886;GO:0005769;GO:0005768;GO:0005768;GO:0005769;GO:0005515;GO:000551	BP:positive regulation of ubiquitin-protein transferase activity;BP:positive regulation of ubiquitin-protein transferase activity;CC:plasma membrane;CC:plasma membrane;CC:membrane;CC:cytoplasmic vesicle;CC:endosome;CC:plasma membrane;CC:early endosome;CC:endosome;CC:endosome;CC:early endosome;MF:protein binding;MF:protein binding;	ENSG00000140450	ARRDC4	arrestin domain containing 4 [Source:HGNC Symbol;Acc:HGNC:28087]	0.305	1.51
GO:0000278;GO:0006281;GO:0031647;GO:0006511;GO:0016578;GO:0005737;GO:0000790;GO:0042393;GO:0004843;GO:000827	BP:mitotic cell cycle;BP:DNA repair;BP:regulation of protein stability;BP:ubiquitin-dependent protein catabolic process;BP:histone deubiquitination;CC:cytoplasm;CC:nuclear chromatin;MF:histone binding;MF:thiol-dependent ubiquitin-specific protease activity;MF:zinc ion binding;	ENSG00000140455	USP3	ubiquitin specific peptidase 3 [Source:HGNC Symbol;Acc:HGNC:12626]	4.51	13.945
GO:0007286;GO:0016358;GO:0000281;GO:0021766;GO:0010629;GO:0001764;GO:0060324;GO:0060613;GO:0045444;GO:0060296;GO:0038108;GO:0021987;GO:0021591;GO:0030837;GO:0051457;GO:0051492;GO:0001947;GO:0046548;GO:0032465;GO:0032402;GO:0001843;GO:1902855;GO:0007608;GO:0034454;GO:0019216;GO:0035176;GO:0021756;GO:0051297;GO:0007601;GO:0034260;GO:0045724;GO:1903546;GO:0030534;GO:0040018;GO:0071539;GO:0050893;GO:…	BP:spermatid development;BP:dendrite development;BP:mitotic cytokinesis;BP:hippocampus development;BP:negative regulation of gene expression;BP:neuron migration;BP:face development;BP:fat pad development;BP:fat cell differentiation;BP:regulation of cilium beat frequency involved in ciliary motility;BP:negative regulation of appetite by leptin-mediated signaling pathway;BP:cerebral cortex developm…	ENSG00000140463	BBS4	Bardet-Biedl syndrome 4 [Source:HGNC Symbol;Acc:HGNC:969]	0.95	3.745
GO:0032922;GO:0032206;GO:0030308;GO:1902187;GO:0048146;GO:0030155;GO:2001238;GO:0050821;GO:0009411;GO:0045165;GO:0001666;GO:0051457;GO:0048384;GO:0045343;GO:0043161;GO:0010332;GO:0071353;GO:2000059;GO:0032211;GO:0030099;GO:0032469;GO:0007182;GO:0060444;GO:0007184;GO:0008285;GO:0060058;GO:0006919;GO:0010761;GO:0006461;GO:0032938;GO:0031065;GO:0060333;GO:0006977;GO:0045892;GO:0016525;GO:1901796;GO:…	BP:circadian regulation of gene expression;BP:positive regulation of telomere maintenance;BP:negative regulation of cell growth;BP:negative regulation of viral release from host cell;BP:positive regulation of fibroblast proliferation;BP:regulation of cell adhesion;BP:positive regulation of extrinsic apoptotic signaling pathway;BP:protein stabilization;BP:response to UV;BP:cell fate commitment;BP:…	ENSG00000140464	PML	promyelocytic leukemia [Source:HGNC Symbol;Acc:HGNC:9113]	231.265	54.515
GO:0048565;GO:0042359;GO:0042493;GO:0006778;GO:0009792;GO:0046677;GO:0009692;GO:0010041;GO:0060137;GO:0055093;GO:0032496;GO:0055114;GO:0001666;GO:0032094;GO:0009308;GO:0050665;GO:0009615;GO:0046483;GO:0017144;GO:0009636;GO:0009611;GO:0009635;GO:0042904;GO:0097267;GO:0033189;GO:0046685;GO:0019373;GO:1900087;GO:0009812;GO:0008283;GO:0017143;GO:0055114;GO:0070988;GO:0007568;GO:0071407;GO:0009624;GO:…	BP:digestive tract development;BP:vitamin D metabolic process;BP:response to drug;BP:porphyrin-containing compound metabolic process;BP:embryo development ending in birth or egg hatching;BP:response to antibiotic;BP:ethylene metabolic process;BP:response to iro;BP:maternal process involved in parturition;BP:response to hyperoxia;BP:response to lipopolysaccharide;BP:oxidation-reduction process;BP:…	ENSG00000140465	CYP1A1	cytochrome P450 family 1 subfamily A member 1 [Source:HGNC Symbol;Acc:HGNC:2595]	1.715	8.58
GO:0001501;GO:0007155;GO:0007417;GO:0005615;GO:0005578;GO:0005201;GO:000554	BP:skeletal system development;BP:cell adhesion;BP:central nervous system development;CC:extracellular space;CC:proteinaceous extracellular matrix;MF:extracellular matrix structural constituent;MF:hyaluronic acid binding;	ENSG00000140511	HAPLN3	hyaluronan and proteoglycan link protein 3 [Source:HGNC Symbol;Acc:HGNC:21446]	473.205	82.825
GO:0051044;GO:0019082;GO:0032902;GO:0032940;GO:0032804;GO:0009966;GO:0043043;GO:0019058;GO:0022617;GO:0032904;GO:0030335;GO:0008283;GO:0032911;GO:0006465;GO:0010951;GO:0016486;GO:0030511;GO:0007568;GO:0030574;GO:0032455;GO:0045714;GO:0005802;GO:0005783;GO:0005886;GO:0005789;GO:0031985;GO:0005615;GO:0016021;GO:0005796;GO:0030140;GO:0009986;GO:0070062;GO:0045121;GO:0000139;GO:0004252;GO:0042277;GO:…	BP:positive regulation of membrane protein ectodomain proteolysis;BP:viral protein processing;BP:nerve growth factor production;BP:secretion by cell;BP:negative regulation of low-density lipoprotein particle receptor catabolic process;BP:regulation of signal transduction;BP:peptide biosynthetic process;BP:viral life cycle;BP:extracellular matrix disassembly;BP:negative regulation of nerve growth …	ENSG00000140564	FURIN	furin, paired basic amino acid cleaving enzyme [Source:HGNC Symbol;Acc:HGNC:8568]	220.35	101.025
GO:0007030;GO:0007018;GO:0007601;GO:0045218;GO:0090136;GO:0005794;GO:0070062;GO:0005813;GO:0030659;GO:0005915;GO:0005871;GO:0005874;GO:0008017;GO:0008569;GO:000552	BP:Golgi organization;BP:microtubule-based movement;BP:visual perception;BP:zonula adherens maintenance;BP:epithelial cell-cell adhesion;CC:Golgi apparatus;CC:extracellular exosome;CC:centrosome;CC:cytoplasmic vesicle membrane;CC:zonula adherens;CC:kinesin complex;CC:microtubule;MF:microtubule binding;MF:ATP-dependent microtubule motor activity, minus-end-directed;MF:ATP binding;	ENSG00000140859	KIFC3	kinesin family member C3 [Source:HGNC Symbol;Acc:HGNC:6326]	30.155	19.935
GO:0060261;GO:0006909;GO:0000122;GO:0030099;GO:0006355;GO:0060333;GO:0042742;GO:0032735;GO:0032729;GO:0071222;GO:0042832;GO:0044130;GO:0060337;GO:0005829;GO:0005654;GO:0003700;GO:0003705;GO:0005515;GO:000097	BP:positive regulation of transcription initiation from RNA polymerase II promoter;BP:phagocytosis;BP:negative regulation of transcription from RNA polymerase II promoter;BP:myeloid cell differentiation;BP:regulation of transcription, DNA-templated;BP:interferon-gamma-mediated signaling pathway;BP:defense response to bacterium;BP:positive regulation of interleukin-12 production;BP:positive regula…	ENSG00000140968	IRF8	interferon regulatory factor 8 [Source:HGNC Symbol;Acc:HGNC:5358]	33.95	0.045
GO:0019933;GO:0043410;GO:0007265;GO:0043234;GO:0005829;GO:0005789;GO:0008022;GO:0031434;GO:0005078;GO:0004672;GO:0046872;GO:000552	BP:cAMP-mediated signaling;BP:positive regulation of MAPK cascade;BP:Ras protein signal transduction;CC:protein complex;CC:cytosol;CC:endoplasmic reticulum membrane;MF:protein C-terminus binding;MF:mitogen-activated protein kinase kinase binding;MF:MAP-kinase scaffold activity;MF:protein kinase activity;MF:metal ion binding;MF:ATP binding;	ENSG00000141068	KSR1	kinase suppressor of ras 1 [Source:HGNC Symbol;Acc:HGNC:6465]	23.605	15.05
GO:0016485;GO:0016021;GO:0005743;GO:0004252;GO:000550	BP:protein processing;CC:integral component of membrane;CC:mitochondrial inner membrane;MF:serine-type endopeptidase activity;MF:calcium ion binding;	ENSG00000141314	RHBDL3	rhomboid like 3 [Source:HGNC Symbol;Acc:HGNC:16502]	0.185	0.055
GO:0006352;GO:2000648;GO:0006355;GO:0006352;GO:1901796;GO:2000648;GO:0006355;GO:0007283;GO:0006367;GO:0006368;GO:0048477;GO:0005737;GO:0001650;GO:0005654;GO:0005669;GO:0005730;GO:0005669;GO:0046982;GO:0003700;GO:0003700;GO:0051059;GO:0003677;GO:004698	BP:DNA-templated transcription, initiation;BP:positive regulation of stem cell proliferation;BP:regulation of transcription, DNA-templated;BP:DNA-templated transcription, initiation;BP:regulation of signal transduction by p53 class mediator;BP:positive regulation of stem cell proliferation;BP:regulation of transcription, DNA-templated;BP:spermatogenesis;BP:transcription initiation from RNA polyme…	ENSG00000141384	TAF4B	TATA-box binding protein associated factor 4b [Source:HGNC Symbol;Acc:HGNC:11538]	1.485	0.555
GO:0060575;GO:0031018;GO:0007596;GO:0048468;GO:0008584;GO:0051145;GO:0000122;GO:0035987;GO:0051240;GO:0070848;GO:0045766;GO:0071310;GO:0071158;GO:0043066;GO:0071456;GO:2000026;GO:0006355;GO:0006351;GO:0045893;GO:0006355;GO:0045893;GO:0000122;GO:0044267;GO:0008584;GO:0043066;GO:0045892;GO:0045766;GO:0071456;GO:0007596;GO:0071158;GO:0006366;GO:0003148;GO:0042493;GO:0070848;GO:0032912;GO:0060575;GO:…	BP:intestinal epithelial cell differentiation;BP:endocrine pancreas development;BP:blood coagulation;BP:cell development;BP:male gonad development;BP:smooth muscle cell differentiation;BP:negative regulation of transcription from RNA polymerase II promoter;BP:endodermal cell differentiation;BP:positive regulation of multicellular organismal process;BP:response to growth factor;BP:positive regulat…	ENSG00000141448	GATA6	GATA binding protein 6 [Source:HGNC Symbol;Acc:HGNC:4174]	1.825	5.055
GO:0046718;GO:0006869;GO:0042493;GO:0071383;GO:2000189;GO:0007165;GO:0007041;GO:0006486;GO:0031579;GO:0046686;GO:0060548;GO:0007628;GO:0042632;GO:0008206;GO:0008203;GO:0006897;GO:0090150;GO:0071404;GO:0016242;GO:0033344;GO:0005783;GO:0070062;GO:0016021;GO:0005635;GO:0048471;GO:0031902;GO:0005794;GO:0005887;GO:0045121;GO:0005765;GO:0005319;GO:0015485;GO:0001618;GO:0004888;GO:0005515;GO:001524	BP:viral entry into host cell;BP:lipid transport;BP:response to drug;BP:cellular response to steroid hormone stimulus;BP:positive regulation of cholesterol homeostasis;BP:signal transduction;BP:lysosomal transport;BP:protein glycosylation;BP:membrane raft organization;BP:response to cadmium ion;BP:negative regulation of cell death;BP:adult walking behavior;BP:cholesterol homeostasis;BP:bile acid …	ENSG00000141458	NPC1	NPC intracellular cholesterol transporter 1 [Source:HGNC Symbol;Acc:HGNC:7897]	24.415	16.505
GO:0045892;GO:0007286;GO:0005737;GO:0005634;GO:0046872;GO:004282	BP:negative regulation of transcription, DNA-templated;BP:spermatid development;CC:cytoplasm;CC:nucleus;MF:metal ion binding;MF:histone deacetylase binding;	ENSG00000141497	ZMYND15	zinc finger MYND-type containing 15 [Source:HGNC Symbol;Acc:HGNC:20997]	3.065	0.545
GO:0007498;GO:0006955;GO:0006955;GO:0043123;GO:0005794;GO:0005615;GO:0070062;GO:0016021;GO:0005886;GO:0005125;GO:0005125;GO:000487	BP:mesoderm development;BP:immune response;BP:immune response;BP:positive regulation of I-kappaB kinase/NF-kappaB signaling;CC:Golgi apparatus;CC:extracellular space;CC:extracellular exosome;CC:integral component of membrane;CC:plasma membrane;MF:cytokine activity;MF:cytokine activity;MF:signal transducer activity;	ENSG00000141574	SECTM1	secreted and transmembrane 1 [Source:HGNC Symbol;Acc:HGNC:10707]	288.61	8.75
GO:0000122;GO:0043066;GO:0016925;GO:0016607;GO:0016604;GO:0035102;GO:0044212;GO:0003682;GO:0035064;GO:0003714;GO:0051219;GO:0032183;GO:0019789;GO:0003727;GO:0019899;GO:001687	BP:negative regulation of transcription from RNA polymerase II promoter;BP:negative regulation of apoptotic process;BP:protein sumoylation;CC:nuclear speck;CC:nuclear body;CC:PRC1 complex;MF:transcription regulatory region DNA binding;MF:chromatin binding;MF:methylated histone binding;MF:transcription corepressor activity;MF:phosphoprotein binding;MF:SUMO binding;MF:SUMO transferase activity;MF:s…	ENSG00000141582	CBX4	chromobox 4 [Source:HGNC Symbol;Acc:HGNC:1554]	15.84	7.93
GO:0009314;GO:0097190;GO:0001503;GO:0071848;GO:0043507;GO:0032496;GO:0042981;GO:0060086;GO:0070555;GO:0048535;GO:0008284;GO:0002548;GO:0030316;GO:0007267;GO:0060749;GO:0051092;GO:0071812;GO:0002250;GO:0009897;GO:0005887;GO:0019955;GO:0046872;GO:000503	BP:response to radiation;BP:apoptotic signaling pathway;BP:ossification;BP:positive regulation of ERK1 and ERK2 cascade via TNFSF11-mediated signaling;BP:positive regulation of JUN kinase activity;BP:response to lipopolysaccharide;BP:regulation of apoptotic process;BP:circadian temperature homeostasis;BP:response to interleukin-1;BP:lymph node development;BP:positive regulation of cell proliferat…	ENSG00000141655	TNFRSF11A	TNF receptor superfamily member 11a [Source:HGNC Symbol;Acc:HGNC:11908]	1.075	5.19
GO:1902043;GO:0048147;GO:0090200;GO:1902237;GO:0010907;GO:0009411;GO:0043525;GO:0010165;GO:0043029;GO:0071456;GO:2001244;GO:0032461;GO:0006919;GO:0072593;GO:0006974;GO:0010917;GO:0042149;GO:0043517;GO:0042771;GO:0051607;GO:0070059;GO:0010498;GO:0001836;GO:1900740;GO:0043331;GO:0005634;GO:0005739;GO:0005741;GO:0005829;GO:000551	BP:positive regulation of extrinsic apoptotic signaling pathway via death domain receptors;BP:negative regulation of fibroblast proliferation;BP:positive regulation of release of cytochrome c from mitochondria;BP:positive regulation of endoplasmic reticulum stress-induced intrinsic apoptotic signaling pathway;BP:positive regulation of glucose metabolic process;BP:response to UV;BP:positive regula…	ENSG00000141682	PMAIP1	phorbol-12-myristate-13-acetate-induced protein 1 [Source:HGNC Symbol;Acc:HGNC:9108]	55.135	7.655
GO:0006355;GO:0005622;GO:000367	BP:regulation of transcription, DNA-templated;CC:intracellular;MF:nucleic acid binding;	ENSG00000142065	ZFP14	ZFP14 zinc finger protein [Source:HGNC Symbol;Acc:HGNC:29312]	0.15	0.445
GO:0009607;GO:0009615;GO:0009607;GO:0045071;GO:0034341;GO:0046597;GO:0060337;GO:0035456;GO:0035455;GO:0032897;GO:0005768;GO:0044446;GO:0070062;GO:0016021;GO:0016021;GO:0016021;GO:0016020;GO:0005764;GO:0005886;GO:0098805;GO:0098588;GO:000551	BP:response to biotic stimulus;BP:response to virus;BP:response to biotic stimulus;BP:negative regulation of viral genome replication;BP:response to interferon-gamma;BP:negative regulation of viral entry into host cell;BP:type I interferon signaling pathway;BP:response to interferon-beta;BP:response to interferon-alpha;BP:negative regulation of viral transcription;CC:endosome;CC:intracellular org…	ENSG00000142089	IFITM3	interferon induced transmembrane protein 3 [Source:HGNC Symbol;Acc:HGNC:5414]	2482.22	1570.36
GO:0006098;GO:0055114;GO:000461	BP:pentose-phosphate shunt;BP:oxidation-reduction process;MF:phosphogluconate dehydrogenas;	ENSG00000142657	PGD	phosphogluconate dehydrogenase [Source:HGNC Symbol;Acc:HGNC:8891]	255.42	162.495
GO:0070613;GO:0007596;GO:0042157;GO:0034199;GO:0071377;GO:1901621;GO:0007188;GO:0097338;GO:0002223;GO:0006468;GO:0051447;GO:0001843;GO:0003091;GO:0070062;GO:0005813;GO:0005654;GO:0048471;GO:0005886;GO:0005952;GO:0005829;GO:0097546;GO:0004691;GO:0000287;GO:0004674;GO:0005524;GO:003162	BP:regulation of protein processing;BP:blood coagulation;BP:lipoprotein metabolic process;BP:activation of protein kinase A activity;BP:cellular response to glucagon stimulus;BP:negative regulation of smoothened signaling pathway involved in dorsal/ventral neural tube patterning;BP:adenylate cyclase-modulating G-protein coupled receptor signaling pathway;BP:response to clozapine;BP:stimulatory C-…	ENSG00000142875	PRKACB	protein kinase cAMP-activated catalytic subunit beta [Source:HGNC Symbol;Acc:HGNC:9381]	4.22	14.54
GO:0042177;GO:0033387;GO:0097055;GO:0043085;GO:0098629;GO:0015847;GO:1902269;GO:0007283;GO:0033116;GO:0030425;GO:0030424;GO:0030133;GO:0043204;GO:0005634;GO:0005739;GO:0048471;GO:1990005;GO:0005829;GO:0005802;GO:0005801;GO:0008792;GO:0015489;GO:0042978;GO:000551	BP:negative regulation of protein catabolic process;BP:putrescine biosynthetic process from ornithine;BP:agmatine biosynthetic process;BP:positive regulation of catalytic activity;BP:trans-Golgi network membrane organization;BP:putrescine transport;BP:positive regulation of polyamine transmembrane transport;BP:spermatogenesis;CC:endoplasmic reticulum-Golgi intermediate compartment membrane;CC:den…	ENSG00000142920	AZIN2	antizyme inhibitor 2 [Source:HGNC Symbol;Acc:HGNC:29957]	1.855	0.58
GO:0042127;GO:0045165;GO:0006355;GO:0045595;GO:0045944;GO:0006355;GO:0021983;GO:0009653;GO:0005634;GO:0005634;GO:0003700;GO:0001158;GO:0003700;GO:000367	BP:regulation of cell proliferation;BP:cell fate commitment;BP:regulation of transcription, DNA-templated;BP:regulation of cell differentiation;BP:positive regulation of transcription from RNA polymerase II promoter;BP:regulation of transcription, DNA-templated;BP:pituitary gland development;BP:anatomical structure morphogenesis;CC:nucleus;CC:nucleus;MF:transcription factor activity, sequence-spe…	ENSG00000143178	TBX19	T-box 19 [Source:HGNC Symbol;Acc:HGNC:11596]	1.25	0.645
GO:0007067;GO:0007062;GO:0051301;GO:0005634;GO:0016020;GO:0031262;GO:0005829;GO:0000777;GO:000551	BP:mitotic nuclear division;BP:sister chromatid cohesion;BP:cell division;CC:nucleus;CC:membrane;CC:Ndc80 complex;CC:cytosol;CC:condensed chromosome kinetochore;MF:protein binding;	ENSG00000143228	NUF2	NUF2, NDC80 kinetochore complex component [Source:HGNC Symbol;Acc:HGNC:14621]	2.21	7.005
GO:0006506;GO:0006506;GO:0016254;GO:0006506;GO:0016254;GO:0016021;GO:0005789;GO:0005789;GO:0005783;GO:0016021;GO:0016021;GO:0016020;GO:0005789;GO:0016758;GO:0016757;GO:0016740;GO:001675	BP:GPI anchor biosynthetic process;BP:GPI anchor biosynthetic process;BP:preassembly of GPI anchor in ER membrane;BP:GPI anchor biosynthetic process;BP:preassembly of GPI anchor in ER membrane;CC:integral component of membrane;CC:endoplasmic reticulum membrane;CC:endoplasmic reticulum membrane;CC:endoplasmic reticulum;CC:integral component of membrane;CC:integral component of membrane;CC:membrane…	ENSG00000143315	PIGM	phosphatidylinositol glycan anchor biosynthesis class M [Source:HGNC Symbol;Acc:HGNC:18858]	0.87	2.675
GO:0006898;GO:0046854;GO:0048015;GO:0046854;GO:0006661;GO:0048015;GO:0005768;GO:0005829;GO:0030867;GO:0000139;GO:0005741;GO:0005622;GO:0048471;GO:0004430;GO:0071889;GO:000552	BP:receptor-mediated endocytosis;BP:phosphatidylinositol phosphorylation;BP:phosphatidylinositol-mediated signaling;BP:phosphatidylinositol phosphorylation;BP:phosphatidylinositol biosynthetic process;BP:phosphatidylinositol-mediated signaling;CC:endosome;CC:cytosol;CC:rough endoplasmic reticulum membrane;CC:Golgi membrane;CC:mitochondrial outer membrane;CC:intracellular;CC:perinuclear region of …	ENSG00000143393	PI4KB	phosphatidylinositol 4-kinase beta [Source:HGNC Symbol;Acc:HGNC:8984]	41.185	26.81
GO:0006508;GO:0071108;GO:0004843;GO:199038	BP:proteolysis;BP:protein K48-linked deubiquitination;MF:thiol-dependent ubiquitin-specific protease activity;MF:Lys48-specific deubiquitinase activity;	ENSG00000143409	MINDY1	MINDY lysine 48 deubiquitinase 1 [Source:HGNC Symbol;Acc:HGNC:25648]	1.71	5.25
GO:0015847;GO:0006596;GO:0043086;GO:0045732;GO:0007283;GO:1902268;GO:0006521;GO:0007283;GO:0043086;GO:0005829;GO:0072562;GO:0005634;GO:0005654;GO:0008073;GO:0015489;GO:0005515;GO:000807	BP:putrescine transport;BP:polyamine biosynthetic process;BP:negative regulation of catalytic activity;BP:positive regulation of protein catabolic process;BP:spermatogenesis;BP:negative regulation of polyamine transmembrane transport;BP:regulation of cellular amino acid metabolic process;BP:spermatogenesis;BP:negative regulation of catalytic activity;CC:cytosol;CC:blood microparticle;CC:nucleus;C…	ENSG00000143450	OAZ3	ornithine decarboxylase antizyme 3 [Source:HGNC Symbol;Acc:HGNC:8097]	3.745	2.18
GO:0019985;GO:0031572;GO:0006513;GO:0009411;GO:0042769;GO:0006511;GO:0006260;GO:0000209;GO:0005737;GO:0005730;GO:0005813;GO:0005694;GO:0031965;GO:0031465;GO:0005654;GO:0031464;GO:0004842;GO:000551	BP:translesion synthesis;BP:G2 DNA damage checkpoint;BP:protein monoubiquitination;BP:response to UV;BP:DNA damage response, detection of DNA damage;BP:ubiquitin-dependent protein catabolic process;BP:DNA replication;BP:protein polyubiquitination;CC:cytoplasm;CC:nucleolus;CC:centrosome;CC:chromosome;CC:nuclear membrane;CC:Cul4B-RING E3 ubiquitin ligase complex;CC:nucleoplasm;CC:Cul4A-RING E3 ubiq…	ENSG00000143476	DTL	denticleless E3 ubiquitin protein ligase homolog [Source:HGNC Symbol;Acc:HGNC:30288]	1	5.515
GO:0006468;GO:0030218;GO:0018108;GO:0006468;GO:0005634;GO:0005654;GO:0005829;GO:0043231;GO:0000287;GO:0004674;GO:0004712;GO:0004713;GO:0005524;GO:0004672;GO:000552	BP:protein phosphorylation;BP:erythrocyte differentiation;BP:peptidyl-tyrosine phosphorylation;BP:protein phosphorylation;CC:nucleus;CC:nucleoplasm;CC:cytosol;CC:intracellular membrane-bounded organelle;MF:magnesium ion binding;MF:protein serine/threonine kinase activity;MF:protein serine/threonine/tyrosine kinase activity;MF:protein tyrosine kinase activity;MF:ATP binding;MF:protein kinase activ…	ENSG00000143479	DYRK3	dual specificity tyrosine phosphorylation regulated kinase 3 [Source:HGNC Symbol;Acc:HGNC:3094]	6.6	4.18
GO:0045957;GO:0045959;GO:0016021;GO:000557	BP:negative regulation of complement activation, alternative pathway;BP:negative regulation of complement activation, classical pathway;CC:integral component of membrane;CC:extracellular region;	ENSG00000143502	SUSD4	sushi domain containing 4 [Source:HGNC Symbol;Acc:HGNC:25470]	1.365	0.05
GO:0032510;GO:0030595;GO:0051607;GO:0032438;GO:0042267;GO:0042742;GO:0007040;GO:0015031;GO:0033364;GO:0042832;GO:0005737;GO:0015630;GO:000551	BP:endosome to lysosome transport via multivesicular body sorting pathway;BP:leukocyte chemotaxis;BP:defense response to virus;BP:melanosome organization;BP:natural killer cell mediated cytotoxicity;BP:defense response to bacterium;BP:lysosome organization;BP:protein transport;BP:mast cell secretory granule organization;BP:defense response to protozoan;CC:cytoplasm;CC:microtubule cytoskeleton;MF:…	ENSG00000143669	LYST	lysosomal trafficking regulator [Source:HGNC Symbol;Acc:HGNC:1968]	1.15	3.62
GO:0046638;GO:0046579;GO:0016310;GO:0007165;GO:0043647;GO:0071277;GO:0032957;GO:0007166;GO:0035556;GO:0045059;GO:0002262;GO:0000165;GO:0035726;GO:0002683;GO:0033030;GO:0006468;GO:0071277;GO:0045595;GO:0032957;GO:1903706;GO:0045061;GO:0045638;GO:0001932;GO:0048523;GO:0048522;GO:0005829;GO:0016020;GO:0005829;GO:0044424;GO:0005634;GO:0005515;GO:0008440;GO:0016301;GO:0016740;GO:0005524;GO:0000166;GO:…	BP:positive regulation of alpha-beta T cell differentiation;BP:positive regulation of Ras protein signal transduction;BP:phosphorylation;BP:signal transduction;BP:inositol phosphate metabolic process;BP:cellular response to calcium ion;BP:inositol trisphosphate metabolic process;BP:cell surface receptor signaling pathway;BP:intracellular signal transduction;BP:positive thymic T cell selection;BP:…	ENSG00000143772	ITPKB	inositol-trisphosphate 3-kinase B [Source:HGNC Symbol;Acc:HGNC:6179]	0.61	8.415
GO:0016126;GO:0006695;GO:0055114;GO:0005639;GO:0031965;GO:0030176;GO:0016021;GO:0050613;GO:0044822;GO:0070087;GO:0003677;GO:0005521;GO:001662	BP:sterol biosynthetic process;BP:cholesterol biosynthetic process;BP:oxidation-reduction process;CC:integral component of nuclear inner membrane;CC:nuclear membrane;CC:integral component of endoplasmic reticulum membrane;CC:integral component of membrane;MF:delta14-sterol reductase activity;MF:pol;MF:chromo shadow domain binding;MF:DNA binding;MF:lamin binding;MF:oxidoreductase activity, acting …	ENSG00000143815	LBR	lamin B receptor [Source:HGNC Symbol;Acc:HGNC:6518]	6.28	19.545
GO:0048704;GO:0045880;GO:0007275;GO:0043154;GO:0061303;GO:0032331;GO:0008285;GO:0071300;GO:0030182;GO:0072498;GO:0045597;GO:0035115;GO:0061072;GO:0045165;GO:0060070;GO:0016055;GO:0061037;GO:0060548;GO:0060070;GO:0048856;GO:0048704;GO:0045880;GO:0045597;GO:0043154;GO:0035115;GO:0032331;GO:0007275;GO:0007275;GO:0007275;GO:0016055;GO:0016055;GO:0030182;GO:0016055;GO:0030182;GO:0045165;GO:0071300;GO:…	BP:embryonic skeletal system morphogenesis;BP:positive regulation of smoothened signaling pathway;BP:multicellular organism development;BP:negative regulation of cysteine-type endopeptidase activity involved in apoptotic process;BP:cornea development in camera-type eye;BP:negative regulation of chondrocyte differentiation;BP:negative regulation of cell proliferation;BP:cellular response to retino…	ENSG00000143816	WNT9A	Wnt family member 9A [Source:HGNC Symbol;Acc:HGNC:12778]	0.36	2.19
GO:0006927;GO:0051056;GO:0008333;GO:0071479;GO:0045786;GO:0006886;GO:0045766;GO:0043065;GO:0030336;GO:0030154;GO:0045786;GO:0045766;GO:0043065;GO:0007155;GO:0006886;GO:0007155;GO:0007155;GO:0007264;GO:0015031;GO:0006810;GO:0006915;GO:0006915;GO:0007275;GO:0030154;GO:0051056;GO:0008333;GO:0043065;GO:0043065;GO:0030168;GO:0045786;GO:0001525;GO:0045766;GO:0000910;GO:0010595;GO:0007266;GO:0030336;GO:…	BP:obsolete transformed cell apoptotic process;BP:regulation of small GTPase mediated signal transduction;BP:endosome to lysosome transport;BP:cellular response to ionizing radiation;BP:negative regulation of cell cycle;BP:intracellular protein transport;BP:positive regulation of angiogenesis;BP:positive regulation of apoptotic process;BP:negative regulation of cell migration;BP:cell differentiat…	ENSG00000143878	RHOB	ras homolog family member B [Source:HGNC Symbol;Acc:HGNC:668]	1486.85	945.195
GO:000573	CC:cytoplasm;	ENSG00000143971	ETAA1	ETAA1, ATR kinase activator [Source:HGNC Symbol;Acc:HGNC:24648]	1.46	6.065
GO:0006355;GO:0005634;GO:000367	BP:regulation of transcription, DNA-templated;CC:nucleus;MF:DNA binding;	ENSG00000143995	MEIS1	Meis homeobox 1 [Source:HGNC Symbol;Acc:HGNC:7000]	0.745	4.175
GO:0042632;GO:0016021;GO:0045121;GO:0000139;GO:0005886;GO:0016021;GO:0016020;GO:0030136;GO:000551	BP:cholesterol homeostasis;CC:integral component of membrane;CC:membrane raft;CC:Golgi membrane;CC:plasma membrane;CC:integral component of membrane;CC:membrane;CC:clathrin-coated vesicle;MF:protein binding;	ENSG00000144063	MALL	mal, T-cell differentiation protein like [Source:HGNC Symbol;Acc:HGNC:6818]	17.565	52.55
GO:0042127;GO:0006355;GO:0006915;GO:0005654;GO:000573	BP:regulation of cell proliferation;BP:regulation of transcription, DNA-templated;BP:apoptotic process;CC:nucleoplasm;CC:cytoplasm;	ENSG00000144354	CDCA7	cell division cycle associated 7 [Source:HGNC Symbol;Acc:HGNC:14628]	2.37	6.75
GO:001602	CC:integral component of membrane;	ENSG00000144369	FAM171B	family with sequence similarity 171 member B [Source:HGNC Symbol;Acc:HGNC:29412]	0.895	2.43
GO:0070098;GO:1902230;GO:0001525;GO:0007165;GO:0007186;GO:0007186;GO:0006935;GO:0001525;GO:0001570;GO:0006935;GO:0007155;GO:0031623;GO:0001570;GO:0007186;GO:0002230;GO:0098792;GO:0070374;GO:0055037;GO:0005905;GO:0016021;GO:0016021;GO:0016021;GO:0016020;GO:0048471;GO:0009986;GO:0005886;GO:0043231;GO:0005768;GO:0005769;GO:0019958;GO:0019956;GO:0016494;GO:0004930;GO:0004871;GO:0004930;GO:0004930;GO:…	BP:chemokine-mediated signaling pathway;BP:negative regulation of intrinsic apoptotic signaling pathway in response to DNA damage;BP:angiogenesis;BP:signal transduction;BP:G-protein coupled receptor signaling pathway;BP:G-protein coupled receptor signaling pathway;BP:chemotaxis;BP:angiogenesis;BP:vasculogenesis;BP:chemotaxis;BP:cell adhesion;BP:receptor internalization;BP:vasculogenesis;BP:G-prot…	ENSG00000144476	ACKR3	atypical chemokine receptor 3 [Source:HGNC Symbol;Acc:HGNC:23692]	186.225	25.43
GO:0016567;GO:0016567;GO:0005795;GO:0005794;GO:0016021;GO:0016020;GO:0000139;GO:0005802;GO:0005795;GO:0016021;GO:0005802;GO:0000139;GO:0016740;GO:0046872;GO:0008270;GO:0004842;GO:0016874;GO:0008270;GO:000484	BP:protein ubiquitination;BP:protein ubiquitination;CC:Golgi stack;CC:Golgi apparatus;CC:integral component of membrane;CC:membrane;CC:Golgi membrane;CC:trans-Golgi network;CC:Golgi stack;CC:integral component of membrane;CC:trans-Golgi network;CC:Golgi membrane;MF:transferase activity;MF:metal ion binding;MF:zinc ion binding;MF:ubiquitin-protein transferase activity;MF:ligase activity;MF:zinc io…	ENSG00000144583	MARCH4	membrane associated ring-CH-type finger 4 [Source:HGNC Symbol;Acc:HGNC:29269]	1.535	5.525
GO:0048705;GO:0006915;GO:0060021;GO:0009791;GO:0006355;GO:0006351;GO:0006915;GO:0006915;GO:0045944;GO:0048008;GO:0060325;GO:0045944;GO:0005634;GO:0005634;GO:0005634;GO:0043565;GO:0001228;GO:0005515;GO:0003700;GO:0003677;GO:0003674;GO:000551	BP:skeletal system morphogenesis;BP:apoptotic process;BP:palate development;BP:post-embryonic development;BP:regulation of transcription, DNA-templated;BP:transcription, DNA-templated;BP:apoptotic process;BP:apoptotic process;BP:positive regulation of transcription from RNA polymerase II promoter;BP:platelet-derived growth factor receptor signaling pathway;BP:face morphogenesis;BP:positive regula…	ENSG00000144655	CSRNP1	cysteine and serine rich nuclear protein 1 [Source:HGNC Symbol;Acc:HGNC:14300]	37.005	12.63
[truncated: 821 more rows]
